# Supplementary material for: Evolved bacterial resistance to the chemotherapy gemcitabine modulates its efficacy in co-cultured cancer cells
Source: eLife. 2023 Feb 3;12:e83140. doi: 10.7554/eLife.83140 (PMC9931390; doi:10.7554/eLife.83140)
Supplement: Supplementary file 1. [file elife-83140-supp1.xlsx]

## Sheet: OriginalScreen(odd)
gene	baseMean	log2FoldChange	lfcSE	stat	pvalue	padj
crr	1543	3.98778	0.0961858	41.4591	6.06e-172	6.9e-169
cytR	2955.72	4.14374	0.0874234	47.3985	6.06e-172	6.9e-169
envZ	1092.69	5.15631	0.124181	41.5225	6.06e-172	6.9e-169
fadR	2713.87	4.1	0.0885087	46.3231	6.06e-172	6.9e-169
galU	2318.86	3.83565	0.0894589	42.8761	6.06e-172	6.9e-169
gmhB	2788.46	5.40219	0.10139	53.2814	6.06e-172	6.9e-169
lpcA	1347.57	4.90585	0.112037	43.7877	6.06e-172	6.9e-169
nupC	51698.4	7.21386	0.0441915	163.241	6.06e-172	6.9e-169
polA	1401.45	3.7231	0.094767	39.2869	6.06e-172	6.9e-169
poxA	1130.21	4.23998	0.10467	40.5082	6.06e-172	6.9e-169
rfaC	5060.45	5.0271	0.0816475	61.5708	6.06e-172	6.9e-169
rfaD	2704.97	5.21874	0.0996313	52.3805	6.06e-172	6.9e-169
rfaE	2956.86	5.05062	0.0954274	52.9263	6.06e-172	6.9e-169
rfaF	7583.66	4.80255	0.0654228	73.408	6.06e-172	6.9e-169
rfaG	8689.69	4.18569	0.0581096	72.0309	6.06e-172	6.9e-169
rfaH	4789.12	4.68149	0.0809989	57.797	6.06e-172	6.9e-169
rfaQ	4252.19	3.28289	0.0777873	42.2034	6.06e-172	6.9e-169
udk	2827.77	3.15488	0.0830928	37.9681	6.06e-172	6.9e-169
ybfE	2948.31	5.33093	0.0989649	53.8669	6.06e-172	6.9e-169
yieP	4857.2	5.7785	0.0904331	63.8981	6.06e-172	6.9e-169
yohJ	14269.9	5.07771	0.0481398	105.478	6.06e-172	6.9e-169
yohK	18698.5	5.24311	0.0437855	119.745	6.06e-172	6.9e-169
yraO	2910.34	4.78774	0.0929645	51.5008	6.06e-172	6.9e-169
ihfB	1301.38	3.49184	0.0934702	37.3579	1.89e-305	2.77e-303
atpC	1024.88	3.71651	0.0996918	37.28	3.46e-304	4.88e-302
trkA	824.198	4.21188	0.11462	36.7464	1.33e-295	1.8e-293
ompR	677.703	4.93266	0.143144	34.4594	3.26e-260	4.25e-258
sapC	1013.72	3.07641	0.0932965	32.9746	1.88e-238	2.37e-236
sapD	900.101	3.18342	0.097103	32.784	9.96e-236	1.21e-233
ihfA	617.073	4.36332	0.133951	32.5739	9.61e-233	1.13e-230
rnhA	553.648	3.90046	0.130493	29.8901	2.65e-196	3.01e-194
pgm	607.297	3.46029	0.117563	29.4334	2.05e-190	2.26e-188
phoR	821.144	2.52897	0.0942358	26.8366	1.21e-158	1.29e-156
sapB	623.555	2.9397	0.109568	26.8299	1.45e-158	1.5e-156
ppc	402.792	4.11932	0.155627	26.4692	2.19e-154	2.21e-152
mioC	695.332	2.6672	0.101636	26.2428	8.63e-152	8.44e-150
ptsN	897.481	2.37634	0.0909147	26.1381	1.35e-150	1.28e-148
purR	616.404	-3.15516	0.121359	-25.9986	5.14e-149	4.76e-147
dhaK	1187.01	2.18252	0.0859829	25.3832	3.87e-142	3.49e-140
fruB	1507.65	2.15337	0.0850563	25.317	2.07e-141	1.83e-139
nagA	455.93	-4.46348	0.177352	-25.1673	9.13e-140	7.84e-138
ytfP	1222.31	2.13599	0.0856821	24.9293	3.59e-137	3.01e-135
nagD	959.637	2.19434	0.0885551	24.7794	1.49e-135	1.22e-133
yjjY	347.878	4.06999	0.164737	24.7059	9.23e-135	7.39e-133
cysP	1514.38	2.04918	0.0847257	24.1861	3.12e-129	2.44e-127
kdsC	634.003	2.49336	0.104577	23.8422	1.22e-125	9.33e-124
pstS	578.517	2.62927	0.110356	23.8254	1.82e-125	1.37e-123
yzfA	1010.44	2.06787	0.087103	23.7405	1.38e-124	1.01e-122
yfjG	377.052	3.37359	0.143287	23.5443	1.44e-122	1.03e-120
arcA	294.765	4.32452	0.186415	23.1984	4.73e-119	3.33e-117
rfaY	871.646	2.07395	0.0900155	23.0399	1.86e-117	1.28e-115
fruR	1183.7	1.93171	0.0850742	22.7062	3.89e-114	2.63e-112
sapF	354.975	3.26708	0.145475	22.458	1.07e-111	7.09e-110
asnC	487.213	2.61907	0.118661	22.0718	5.9e-108	3.85e-106
cyaA	275.633	3.85275	0.177574	21.6965	2.21e-104	1.42e-102
cysW	1447.52	1.8264	0.0842405	21.6807	3.12e-104	1.96e-102
trkH	511.862	2.468	0.11494	21.472	2.84e-102	1.76e-100
yoaH	518.71	-2.62527	0.122712	-21.3938	1.53e-101	9.27e-100
lon	709.574	2.05685	0.0965797	21.2969	1.21e-100	7.24e-99
sodA	245.037	4.1894	0.198443	21.1113	6.26e-99	3.67e-97
cysU	1487.46	1.75286	0.0840115	20.8645	1.13e-96	6.5e-95
cysA	1234.41	1.75051	0.0843951	20.7418	1.45e-95	8.25e-94
surA	754.243	1.93407	0.0935733	20.669	6.58e-95	3.68e-93
rnd	415.542	-2.85951	0.138707	-20.6155	1.99e-94	1.1e-92
arcB	554.906	2.22528	0.109124	20.3923	1.96e-92	1.06e-90
ppiB	1015.46	1.717	0.0857381	20.0261	3.26e-89	1.74e-87
atpA	644.665	1.94795	0.100258	19.4294	4.35e-84	2.29e-82
gcvR	566.554	2.07934	0.10719	19.3987	7.92e-84	4.1e-82
rpmE	308.923	2.87804	0.148425	19.3904	9.29e-84	4.74e-82
malG	1099.7	1.63793	0.0846439	19.3509	2e-83	1.01e-81
zwf	258.32	3.18252	0.166347	19.1319	1.37e-81	6.8e-80
sucB	368.907	2.45436	0.131896	18.6082	2.76e-77	1.35e-75
glgA	641.064	1.85676	0.100062	18.5561	7.28e-77	3.51e-75
tatA	918.216	1.5989	0.0870376	18.3702	2.27e-75	1.08e-73
ndk	241.429	3.03483	0.168515	18.0093	1.65e-72	7.73e-71
yicN	1443.83	1.48325	0.083512	17.761	1.42e-70	6.57e-69
proQ	272.056	-3.05088	0.173035	-17.6316	1.41e-69	6.45e-68
rffH	803.459	1.55779	0.0900245	17.304	4.39e-67	1.98e-65
fdx	295.168	2.53419	0.146727	17.2714	7.72e-67	3.44e-65
uhpT	1145.14	1.435	0.0838795	17.1079	1.3e-65	5.7e-64
ruvC	287.143	-2.76665	0.162334	-17.0429	3.94e-65	1.71e-63
pstB	658.488	1.63433	0.0978796	16.6973	1.37e-62	5.89e-61
ruvA	360.996	-2.30524	0.138571	-16.6358	3.83e-62	1.63e-60
fadA	530.299	1.80595	0.108741	16.6078	6.11e-62	2.56e-60
malE	1044.32	1.39782	0.0845361	16.5352	2.05e-61	8.48e-60
hfq	192.422	6.5532	0.400362	16.3682	3.23e-60	1.32e-58
prc	184.182	-4.39612	0.269493	-16.3125	8.04e-60	3.25e-58
prpB	1598.2	1.34306	0.0831511	16.1521	1.1e-58	4.39e-57
ldcA	378.13	-2.13646	0.13341	-16.0142	1.02e-57	4.02e-56
fruA	1908.64	1.31238	0.0826745	15.8741	9.58e-57	3.75e-55
mdtK	177.36	-3.93105	0.248333	-15.8297	1.94e-56	7.51e-55
cyoC	2036.1	1.30178	0.0823705	15.804	2.92e-56	1.12e-54
fieF	729.174	1.46459	0.0929861	15.7506	6.8e-56	2.58e-54
cyoB	2044.1	1.29451	0.0823418	15.7211	1.08e-55	4.06e-54
yahM	1233.38	1.31119	0.0834223	15.7175	1.15e-55	4.26e-54
metL	474	-1.86269	0.118547	-15.7127	1.24e-55	4.54e-54
fcl	734.902	1.4494	0.0926378	15.6458	3.55e-55	1.29e-53
yahF	982.449	1.31853	0.0851367	15.4872	4.23e-54	1.52e-52
rfaI	1920.84	1.27847	0.0826119	15.4757	5.07e-54	1.8e-52
prmA	868.56	1.35015	0.0874921	15.4316	1e-53	3.53e-52
hslV	724.806	1.43107	0.0931195	15.3681	2.68e-53	9.34e-52
ruvB	290.919	-2.36343	0.153859	-15.361	2.99e-53	1.03e-51
uspA	1034.65	1.29151	0.0844105	15.3003	7.61e-53	2.6e-51
cyaY	379.654	1.91446	0.125431	15.263	1.35e-52	4.56e-51
recF	403.669	1.84306	0.121693	15.1451	8.17e-52	2.72e-50
yahJ	842.032	1.33556	0.0881851	15.1449	8.18e-52	2.72e-50
racC	194.654	2.72858	0.180723	15.0982	1.66e-51	5.48e-50
zitB	433.472	1.77479	0.117725	15.0758	2.34e-51	7.62e-50
dhaL	757.427	1.37626	0.0913338	15.0685	2.61e-51	8.43e-50
ydhB	319.162	-2.18169	0.14482	-15.0649	2.76e-51	8.83e-50
sixA	775.544	1.36229	0.0905149	15.0504	3.43e-51	1.09e-49
chpS	385.239	1.87123	0.124341	15.0492	3.49e-51	1.1e-49
hscB	294.391	2.09899	0.14222	14.7588	2.7e-49	8.41e-48
gntY	144.74	3.28907	0.223354	14.7258	4.4e-49	1.36e-47
rffA	526.483	1.5896	0.108047	14.7121	5.39e-49	1.65e-47
gltP	990.326	1.23314	0.0848533	14.5326	7.53e-48	2.29e-46
glnG	132.655	3.46133	0.23883	14.4929	1.34e-47	4.04e-46
cyoE	1725.67	1.20045	0.0828422	14.4909	1.38e-47	4.13e-46
speD	146.772	3.13667	0.217718	14.407	4.67e-47	1.38e-45
cyoD	1612.06	1.19157	0.0829454	14.3657	8.5e-47	2.49e-45
rumA	947.621	1.22403	0.0855096	14.3145	1.78e-46	5.17e-45
secB	359.712	1.79665	0.127824	14.0557	7.1e-45	2.05e-43
gpmA	207.21	2.38038	0.169989	14.0032	1.49e-44	4.26e-43
icd	116.789	3.64081	0.261967	13.898	6.52e-44	1.85e-42
yahO	1517	1.15301	0.0829655	13.8975	6.56e-44	1.85e-42
rffC	471.019	1.56725	0.112877	13.8846	7.86e-44	2.19e-42
yhdJ	1013.65	1.17124	0.0844259	13.873	9.24e-44	2.56e-42
atpG	371.749	1.73931	0.125492	13.8599	1.11e-43	3.05e-42
yqiB	973.17	1.17055	0.0849932	13.7723	3.74e-43	1.02e-41
yidJ	780.329	1.23438	0.0899821	13.7181	7.91e-43	2.14e-41
fadL	299.398	-2.00325	0.146646	-13.6604	1.75e-42	4.7e-41
yqiC	243.663	2.10734	0.154444	13.6447	2.17e-42	5.79e-41
gor	1257.1	1.13006	0.0831082	13.5974	4.15e-42	1.09e-40
yfdG	355.187	-1.81627	0.133574	-13.5974	4.15e-42	1.09e-40
znuB	799.893	-1.23904	0.09121	-13.5845	4.95e-42	1.29e-40
yigL	349.233	1.74555	0.129116	13.5193	1.2e-41	3.11e-40
yicC	1666.2	1.11496	0.0828114	13.4639	2.55e-41	6.55e-40
rffT	382.541	1.64451	0.123395	13.3272	1.61e-40	4.1e-39
fadD	429.114	-1.61101	0.121141	-13.2987	2.36e-40	5.96e-39
pyrI	164.687	-2.84077	0.21364	-13.297	2.41e-40	6.06e-39
ydhQ	337.589	-1.81774	0.136809	-13.2867	2.76e-40	6.9e-39
rnb	350.439	1.70825	0.128679	13.2753	3.22e-40	7.98e-39
fdoG	456.403	1.51346	0.11402	13.2736	3.29e-40	8.05e-39
ygdL	386.006	-1.69214	0.127478	-13.274	3.28e-40	8.05e-39
lipB	122.387	3.17789	0.239961	13.2434	4.93e-40	1.2e-38
tig	322.61	-1.84277	0.1399	-13.1721	1.27e-39	3.06e-38
metB	568.213	1.35812	0.103734	13.0923	3.64e-39	8.73e-38
hslO	874.356	1.1307	0.0868778	13.0149	1.01e-38	2.4e-37
gntX	108.426	3.43365	0.263908	13.0108	1.06e-38	2.51e-37
acnB	224.009	2.08085	0.16029	12.9818	1.55e-38	3.64e-37
priA	167.627	2.46915	0.190238	12.9793	1.6e-38	3.74e-37
prpR	768.415	1.16155	0.0903168	12.8609	7.47e-38	1.73e-36
csdA	315.045	-1.8107	0.141028	-12.8393	9.88e-38	2.27e-36
fdhD	580.017	1.31756	0.102654	12.835	1.04e-37	2.39e-36
ubiF	132.639	2.83094	0.221009	12.8091	1.46e-37	3.31e-36
rraA	456.966	1.45451	0.113698	12.7928	1.8e-37	4.06e-36
rhaA	290.71	1.79681	0.140549	12.7842	2.01e-37	4.51e-36
ydgI	322.616	-1.78019	0.13927	-12.7823	2.06e-37	4.59e-36
dppC	598.582	1.28672	0.101085	12.7291	4.07e-37	9.02e-36
oxyR	411.09	1.51299	0.118917	12.7231	4.4e-37	9.68e-36
ysaB	1477.68	1.05249	0.0828728	12.7	5.91e-37	1.29e-35
ydcQ	616.751	1.26386	0.0996371	12.6846	7.19e-37	1.56e-35
yidK	946.844	1.076	0.0852523	12.6214	1.61e-36	3.47e-35
entA	759.133	1.13942	0.0906774	12.5657	3.26e-36	7e-35
yggW	500.356	1.37395	0.10941	12.5578	3.6e-36	7.68e-35
gltS	1271.95	1.0405	0.082975	12.5399	4.52e-36	9.58e-35
yrbE	355.398	1.58353	0.127179	12.4512	1.38e-35	2.9e-34
hscA	251.267	1.86592	0.150106	12.4307	1.78e-35	3.73e-34
fdhE	542.348	1.30007	0.105657	12.3046	8.56e-35	1.78e-33
nudF	935.074	1.05023	0.085433	12.293	9.88e-35	2.05e-33
ycdS	260.377	-1.89794	0.154434	-12.2897	1.03e-34	2.12e-33
ptsP	452.545	-1.43217	0.117263	-12.2133	2.64e-34	5.4e-33
apaG	1782.36	1.00846	0.0825853	12.2111	2.71e-34	5.52e-33
ilvE	513.821	1.30883	0.108045	12.1138	8.93e-34	1.81e-32
fldB	982.519	1.01389	0.0845886	11.9861	4.2e-33	8.45e-32
yihG	501.394	1.3078	0.109125	11.9844	4.29e-33	8.57e-32
trxB	298.645	1.65193	0.137875	11.9814	4.45e-33	8.85e-32
hofQ	927.132	1.02346	0.085532	11.9658	5.37e-33	1.06e-31
ytfN	167.171	-2.39625	0.200571	-11.9472	6.72e-33	1.32e-31
ynfM	394.082	-1.4685	0.124468	-11.7982	3.99e-32	7.8e-31
argB	514.369	1.26762	0.107872	11.7511	6.97e-32	1.35e-30
rfbC	509.24	-1.30285	0.111102	-11.7267	9.3e-32	1.8e-30
ygdK	303.576	-1.65415	0.141755	-11.6691	1.83e-31	3.53e-30
radA	869.727	1.01196	0.0867699	11.6626	1.98e-31	3.79e-30
yjaG	414.958	1.37453	0.117899	11.6586	2.07e-31	3.95e-30
xylA	834.279	1.02023	0.0877436	11.6274	2.99e-31	5.66e-30
rng	185.021	2.03423	0.175444	11.5948	4.38e-31	8.25e-30
fabF	122.432	-2.84766	0.248288	-11.4692	1.88e-30	3.53e-29
fruK	90.0742	-4.10545	0.36186	-11.3454	7.82e-30	1.46e-28
sdaA	1057.62	-0.960581	0.0847989	-11.3278	9.56e-30	1.77e-28
cyoA	1268.11	0.937835	0.0828657	11.3175	1.07e-29	1.98e-28
rimI	122.507	-2.7785	0.245985	-11.2954	1.38e-29	2.54e-28
selB	703.727	1.05337	0.0933164	11.2882	1.5e-29	2.74e-28
hupB	366.188	-1.44756	0.128501	-11.265	1.95e-29	3.54e-28
sthA	557.346	1.17094	0.104068	11.2517	2.27e-29	4.1e-28
yahC	1345.93	0.92695	0.0828036	11.1946	4.34e-29	7.79e-28
gph	540.261	1.17862	0.105461	11.1759	5.35e-29	9.56e-28
truB	321.978	1.46858	0.132314	11.0991	1.27e-28	2.25e-27
lpp	149.649	-2.33041	0.210215	-11.0858	1.47e-28	2.6e-27
gcvA	159.008	-2.24125	0.202244	-11.0819	1.54e-28	2.7e-27
priC	958.09	0.938519	0.0848541	11.0604	1.95e-28	3.42e-27
yiiS	515.776	1.18323	0.107519	11.0049	3.62e-28	6.31e-27
fadB	514.478	1.18279	0.107607	10.9918	4.19e-28	7.26e-27
betB	978.25	0.928776	0.0845174	10.9892	4.31e-28	7.44e-27
prpE	1428.5	0.908862	0.0827532	10.9828	4.62e-28	7.94e-27
yjcO	707.673	1.02051	0.0930326	10.9694	5.36e-28	9.17e-27
glpK	1369.3	0.906296	0.0827723	10.9493	6.7e-28	1.14e-26
fdoI	215.28	1.74678	0.160181	10.9051	1.09e-27	1.84e-26
acrF	650.417	1.05179	0.0966837	10.8787	1.46e-27	2.45e-26
tldD	592.84	1.09705	0.101023	10.8593	1.8e-27	3.02e-26
yhdU	786.9	0.968399	0.0891968	10.8569	1.85e-27	3.09e-26
recT	275.423	-1.59321	0.147299	-10.8162	2.89e-27	4.79e-26
yieL	536.176	1.14154	0.105702	10.7996	3.46e-27	5.72e-26
yqaB	435.821	1.2378	0.115033	10.7603	5.3e-27	8.71e-26
yieF	1023.71	0.902478	0.0839072	10.7557	5.57e-27	9.12e-26
yfaL	389.289	-1.33504	0.124224	-10.747	6.12e-27	9.97e-26
hepA	333.834	-1.43738	0.13389	-10.7355	6.93e-27	1.12e-25
selA	771.495	0.962762	0.0898061	10.7205	8.16e-27	1.32e-25
entD	458.182	1.20522	0.112717	10.6924	1.1e-26	1.78e-25
dedD	84.9478	-3.54077	0.333561	-10.6151	2.54e-26	4.06e-25
yfcD	411.416	-1.2708	0.120818	-10.5183	7.11e-26	1.13e-24
yigB	367.944	1.3032	0.123938	10.5149	7.38e-26	1.17e-24
rsd	533.125	1.113	0.105901	10.5098	7.79e-26	1.23e-24
fpr	561.05	1.08461	0.103539	10.4754	1.12e-25	1.76e-24
hslU	664.907	0.999734	0.0955928	10.4582	1.34e-25	2.1e-24
yahI	912.128	0.895335	0.0856406	10.4546	1.4e-25	2.18e-24
malZ	623.258	-1.04708	0.10044	-10.4249	1.91e-25	2.96e-24
yrbF	398.708	1.2416	0.119378	10.4005	2.47e-25	3.81e-24
yihD	407.112	1.22934	0.118279	10.3936	2.65e-25	4.08e-24
ompL	606.744	1.03605	0.0998326	10.3778	3.13e-25	4.79e-24
ycjV	885.049	-0.90772	0.0875129	-10.3724	3.31e-25	5.04e-24
ynfL	574.351	-1.08347	0.104466	-10.3715	3.34e-25	5.07e-24
frwC	484.724	1.13952	0.110053	10.3543	4e-25	6.04e-24
trpD	61.8199	5.65656	0.547998	10.3222	5.59e-25	8.41e-24
rfaJ	945.439	0.874504	0.0849901	10.2895	7.86e-25	1.18e-23
yeaW	1256.88	-0.859371	0.083674	-10.2705	9.57e-25	1.43e-23
ibpB	930.866	0.873335	0.0852483	10.2446	1.25e-24	1.86e-23
purT	893.166	-0.893715	0.0872875	-10.2387	1.33e-24	1.97e-23
rfbD	386.009	-1.27133	0.124199	-10.2362	1.36e-24	2.01e-23
aslB	326.906	1.33737	0.130826	10.2225	1.57e-24	2.3e-23
entE	673.856	0.96343	0.0949579	10.1459	3.46e-24	5.05e-23
tyrR	338.261	-1.34152	0.132372	-10.1344	3.89e-24	5.65e-23
ycaR	104.276	2.44728	0.241491	10.134	3.9e-24	5.65e-23
glgX	477.202	1.1212	0.110692	10.129	4.11e-24	5.93e-23
mltD	416.254	1.1814	0.117039	10.094	5.87e-24	8.44e-23
yhbE	354.403	1.26899	0.125906	10.0788	6.85e-24	9.81e-23
ptsA	373.645	1.23662	0.122824	10.0683	7.63e-24	1.09e-22
yiiR	585.703	1.01526	0.101432	10.0093	1.39e-23	1.97e-22
rplI	175.836	1.76555	0.177183	9.96458	2.18e-23	3.08e-22
znuA	297.855	-1.39611	0.140505	-9.93639	2.89e-23	4.07e-22
smg	816.553	0.873958	0.0880438	9.9264	3.2e-23	4.48e-22
pck	729.948	0.908318	0.0916541	9.91028	3.76e-23	5.25e-22
yifN	418.255	1.1532	0.116674	9.88396	4.89e-23	6.8e-22
ubiC	1073.3	0.821044	0.0833376	9.85202	6.72e-23	9.31e-22
yhdW	775.125	0.881489	0.0895234	9.84647	7.1e-23	9.8e-22
fsaB	371.903	1.20999	0.122991	9.83805	7.72e-23	1.06e-21
dppB	703.334	0.913812	0.0930914	9.81629	9.58e-23	1.31e-21
kdgT	539.202	1.03094	0.10521	9.79886	1.14e-22	1.55e-21
sdaC	286.83	-1.3992	0.142903	-9.79125	1.23e-22	1.67e-21
mog	538.483	1.0293	0.105226	9.78186	1.35e-22	1.82e-21
tgt	603.485	-0.994537	0.101768	-9.7726	1.48e-22	1.99e-21
yqgC	94.4381	-2.71291	0.277932	-9.76104	1.65e-22	2.22e-21
ftsN	121.189	2.13306	0.218742	9.75152	1.82e-22	2.43e-21
glpF	277.358	1.37281	0.140819	9.74873	1.87e-22	2.49e-21
rbsC	442.761	1.11085	0.113956	9.74804	1.88e-22	2.5e-21
yahE	903.896	0.834907	0.0857487	9.73667	2.1e-22	2.78e-21
pykF	1619.27	0.80307	0.0825816	9.72456	2.37e-22	3.12e-21
rfbX	631.13	-0.965653	0.0995255	-9.70257	2.94e-22	3.86e-21
glpX	514.253	1.03863	0.107283	9.68127	3.62e-22	4.74e-21
ilvA	453.934	1.08977	0.112767	9.66392	4.29e-22	5.59e-21
uraA	429.593	1.11418	0.115315	9.66206	4.37e-22	5.68e-21
yeaX	1149.82	-0.809453	0.0838009	-9.65924	4.49e-22	5.81e-21
yeaB	1049.48	-0.809778	0.0845041	-9.58271	9.45e-22	1.22e-20
yhdE	720.118	0.881977	0.0921102	9.57523	1.02e-21	1.31e-20
ade	944.983	0.812611	0.0849221	9.5689	1.08e-21	1.38e-20
yhdV	625.098	0.939603	0.0982709	9.56135	1.16e-21	1.48e-20
htpX	1254.88	-0.796636	0.0835476	-9.53511	1.5e-21	1.9e-20
yiiG	416.897	1.10847	0.116743	9.49492	2.2e-21	2.79e-20
wzzE	516.729	1.0153	0.10701	9.48792	2.36e-21	2.97e-20
rssB	184.916	-1.69458	0.178646	-9.48569	2.41e-21	3.03e-20
queA	820.858	-0.844683	0.0891014	-9.48003	2.54e-21	3.18e-20
hflD	99.5135	2.3188	0.244755	9.47399	2.69e-21	3.36e-20
yicL	1074.67	0.787544	0.0832963	9.45473	3.24e-21	4.03e-20
yifL	263.873	1.35801	0.143673	9.45206	3.32e-21	4.12e-20
deoR	211.883	-1.55234	0.165339	-9.38886	6.07e-21	7.49e-20
glgB	275.542	1.32211	0.140932	9.38121	6.52e-21	8.03e-20
sbp	510.203	1.0077	0.107527	9.37156	7.15e-21	8.77e-20
ilvM	340.284	1.19896	0.127947	9.37073	7.2e-21	8.8e-20
mutM	962.86	0.79196	0.084598	9.36145	7.86e-21	9.55e-20
yzcX	201.598	1.5324	0.16369	9.36161	7.85e-21	9.55e-20
trkD	404.761	1.10173	0.118183	9.32226	1.14e-20	1.38e-19
hupA	148.609	-1.88541	0.202259	-9.32175	1.14e-20	1.38e-19
qor	703.753	0.862121	0.0929967	9.27045	1.85e-20	2.23e-19
yhjV	593.97	0.932097	0.100627	9.26286	1.99e-20	2.38e-19
pepE	530.099	0.978616	0.105832	9.24687	2.31e-20	2.76e-19
pepQ	491.674	1.00808	0.10913	9.23743	2.52e-20	3e-19
mscL	665.093	0.875637	0.0953716	9.18132	4.26e-20	5.05e-19
udp	312.269	1.22196	0.133109	9.18013	4.31e-20	5.09e-19
dcuD	594.819	0.920364	0.10052	9.15601	5.39e-20	6.34e-19
ybfF	613.267	0.903827	0.0990729	9.12285	7.32e-20	8.59e-19
glnE	124.954	-2.04182	0.224107	-9.11093	8.17e-20	9.55e-19
yigZ	369.375	1.11755	0.123054	9.08178	1.07e-19	1.24e-18
nadB	50.92	5.95127	0.655603	9.07754	1.11e-19	1.29e-18
yidP	849.832	0.788053	0.0869859	9.05955	1.31e-19	1.52e-18
pldA	327.585	1.17814	0.130091	9.05628	1.35e-19	1.56e-18
rbsA	409.006	1.06383	0.11753	9.05157	1.41e-19	1.62e-18
feoB	323.22	1.18434	0.130928	9.04579	1.49e-19	1.7e-18
ycjU	457.093	-1.0342	0.114487	-9.03335	1.66e-19	1.9e-18
gldA	458.664	1.01251	0.112132	9.02968	1.72e-19	1.96e-18
mdtF	699.845	0.84087	0.0931885	9.02332	1.82e-19	2.07e-18
yjbC	546.368	0.939026	0.104434	8.99157	2.44e-19	2.76e-18
yhdL	898.996	0.770118	0.0857658	8.97931	2.72e-19	3.07e-18
yrbD	366.017	1.1072	0.123496	8.96544	3.09e-19	3.48e-18
yebU	1264.47	-0.748016	0.0834499	-8.96365	3.14e-19	3.52e-18
aceF	54.0467	6.30779	0.704157	8.95792	3.31e-19	3.7e-18
rbn	419.685	1.04074	0.116244	8.95302	3.46e-19	3.85e-18
argH	324.804	1.16589	0.130552	8.93043	4.24e-19	4.71e-18
yihP	493.457	0.96903	0.108894	8.89885	5.64e-19	6.25e-18
rhtB	302.344	1.19982	0.134874	8.89584	5.8e-19	6.4e-18
yafX	572.201	0.908592	0.102295	8.88211	6.56e-19	7.22e-18
trxA	194.647	1.4734	0.166127	8.86913	7.37e-19	8.08e-18
ysgA	251.265	1.29711	0.14646	8.85639	8.26e-19	9.03e-18
ydhD	156.86	1.64903	0.186415	8.84602	9.07e-19	9.88e-18
yrfA	408.691	1.03895	0.117511	8.84132	9.46e-19	1.03e-17
rhaT	534.171	0.929897	0.105393	8.82317	1.11e-18	1.21e-17
yebN	1339.68	-0.734223	0.0833407	-8.8099	1.25e-18	1.35e-17
ilvL	425.988	1.01604	0.115434	8.8019	1.35e-18	1.45e-17
yciB	283.258	-1.25122	0.142515	-8.77954	1.64e-18	1.76e-17
rhaB	509.139	0.943154	0.107482	8.77498	1.71e-18	1.83e-17
def	792.08	0.778269	0.0887299	8.77121	1.77e-18	1.89e-17
ilvN	1202.12	0.72417	0.0827371	8.75267	2.08e-18	2.22e-17
argE	467.933	0.972707	0.111173	8.74945	2.14e-18	2.27e-17
dhaR	375.949	-1.09005	0.124606	-8.74797	2.17e-18	2.3e-17
pdxK	900.911	0.748759	0.0857127	8.73569	2.42e-18	2.55e-17
yhcH	760.112	0.786046	0.0900352	8.73043	2.54e-18	2.67e-17
zraR	553.159	0.905779	0.103817	8.72478	2.67e-18	2.79e-17
cdh	387.915	1.04837	0.120214	8.72092	2.76e-18	2.88e-17
yicI	1034.7	0.727917	0.0836068	8.70644	3.14e-18	3.27e-17
kdgK	589.753	0.873924	0.100849	8.66563	4.49e-18	4.66e-17
ybhE	53.8007	-3.86584	0.446128	-8.66532	4.5e-18	4.66e-17
ydfR	858.142	-0.760384	0.0877913	-8.66127	4.67e-18	4.82e-17
ilvD	403.211	1.02188	0.118139	8.64985	5.16e-18	5.31e-17
yhdH	807.34	0.761683	0.0881928	8.63657	5.79e-18	5.94e-17
yfcX	352.916	-1.10778	0.1283	-8.63432	5.91e-18	6.05e-17
rbsB	339.492	1.09851	0.127727	8.6005	7.94e-18	8.1e-17
mdoG	180.435	-1.53795	0.178856	-8.59886	8.05e-18	8.19e-17
yiaF	490.028	0.935624	0.109121	8.57419	9.98e-18	1.01e-16
yejK	259.094	-1.26797	0.148135	-8.55956	1.13e-17	1.15e-16
sgbE	894.477	0.734046	0.0858474	8.55059	1.22e-17	1.24e-16
exbD	116.109	1.87758	0.219909	8.53798	1.37e-17	1.37e-16
rarD	381.104	1.03088	0.121088	8.51348	1.69e-17	1.69e-16
yihV	445.755	0.96432	0.113294	8.51164	1.71e-17	1.71e-16
yidE	1085.29	0.707202	0.0831537	8.50475	1.82e-17	1.81e-16
recJ	1563.52	-0.706923	0.0831313	-8.5037	1.84e-17	1.83e-16
bcp	603.284	-0.861105	0.101279	-8.50228	1.86e-17	1.84e-16
yiiT	520.324	0.904401	0.106488	8.49298	2.01e-17	1.99e-16
ynbD	435.343	-0.988589	0.116507	-8.48525	2.15e-17	2.12e-16
mntH	539.998	0.889343	0.104833	8.48345	2.19e-17	2.15e-16
rhtC	286.41	1.16941	0.137977	8.47541	2.34e-17	2.3e-16
yfgC	142.522	-1.72225	0.203669	-8.4561	2.76e-17	2.7e-16
rhaR	449.245	0.954621	0.112915	8.4543	2.81e-17	2.74e-16
smtA	299.321	-1.16938	0.138552	-8.44001	3.17e-17	3.09e-16
ilvY	291.594	1.15253	0.136836	8.42269	3.68e-17	3.57e-16
ymjB	670.777	-0.810527	0.0962414	-8.42181	3.71e-17	3.58e-16
ynfH	615.004	-0.843662	0.100312	-8.41042	4.09e-17	3.94e-16
uhpC	782.719	0.747895	0.0890667	8.39702	4.58e-17	4.4e-16
yijF	531.182	0.885855	0.105544	8.39321	4.73e-17	4.54e-16
hsrA	370.378	1.02863	0.122584	8.39117	4.81e-17	4.6e-16
ydfA	618.079	-0.838787	0.100048	-8.38385	5.12e-17	4.89e-16
cpdA	308.095	-1.1444	0.136576	-8.37917	5.33e-17	5.07e-16
yqjI	134.61	-1.76229	0.210388	-8.37638	5.46e-17	5.18e-16
yeaV	868.363	-0.731777	0.0874549	-8.36748	5.89e-17	5.57e-16
dtd	528.975	0.88481	0.105758	8.36636	5.94e-17	5.61e-16
yhcN	515.216	0.893622	0.106895	8.35984	6.28e-17	5.91e-16
phnG	813.119	0.73513	0.0879814	8.35551	6.52e-17	6.12e-16
dppD	566.592	0.855118	0.102642	8.3311	8.01e-17	7.5e-16
galF	620.637	-0.830073	0.0998547	-8.31281	9.35e-17	8.73e-16
degQ	783.138	0.739213	0.0890367	8.30234	1.02e-16	9.51e-16
yhcO	618.02	0.818042	0.0985961	8.2969	1.07e-16	9.9e-16
ynfK	508.497	-0.906178	0.109218	-8.29699	1.07e-16	9.9e-16
yihM	446.369	0.938886	0.11317	8.29626	1.07e-16	9.93e-16
yiiM	443.045	0.94148	0.113504	8.29466	1.09e-16	1e-15
frwD	486.93	0.906535	0.109326	8.29201	1.11e-16	1.02e-15
rhaD	451.013	0.934077	0.112704	8.28786	1.15e-16	1.06e-15
bcsB	546.764	0.863315	0.104246	8.28149	1.22e-16	1.11e-15
aceB	413.692	0.966482	0.11673	8.27961	1.24e-16	1.13e-15
yhiR	607.203	0.822411	0.0994098	8.27294	1.31e-16	1.19e-15
gnd	244.922	1.22248	0.147804	8.27094	1.33e-16	1.21e-15
yihF	326.305	1.07356	0.129955	8.26102	1.44e-16	1.31e-15
phnE	755.577	0.744273	0.0901905	8.25223	1.55e-16	1.4e-15
prlC	660.25	0.788538	0.0955772	8.25027	1.58e-16	1.42e-15
yigI	294.745	1.11964	0.136063	8.22887	1.89e-16	1.7e-15
yihN	425.091	0.949344	0.115406	8.22614	1.93e-16	1.73e-15
setC	846.508	0.713727	0.0870009	8.20368	2.33e-16	2.08e-15
iscA	176.755	1.42739	0.174043	8.20139	2.38e-16	2.12e-15
treF	471.317	0.907315	0.110719	8.19474	2.51e-16	2.23e-15
adhE	82.6852	2.17176	0.26545	8.18142	2.81e-16	2.49e-15
ybiX	244.258	1.20973	0.147884	8.18028	2.83e-16	2.5e-15
yibA	768.042	0.733068	0.0896442	8.17753	2.9e-16	2.56e-15
nanR	749.919	0.739242	0.0904476	8.17316	3e-16	2.64e-15
dinF	793.427	0.723749	0.0886486	8.16425	3.23e-16	2.84e-15
yeeX	137.484	-1.68647	0.206956	-8.14893	3.67e-16	3.21e-15
nanA	773.453	0.727768	0.0894041	8.14021	3.95e-16	3.45e-15
phnK	682.154	0.765236	0.0941363	8.12902	4.33e-16	3.77e-15
yiaA	573.942	0.828976	0.102038	8.12421	4.5e-16	3.91e-15
ymfL	95.2761	-2.09796	0.258253	-8.12366	4.52e-16	3.92e-15
pabB	46.1065	-4.59665	0.566772	-8.11022	5.05e-16	4.37e-15
pflC	428.647	0.931933	0.114983	8.10497	5.28e-16	4.55e-15
recE	114.656	-1.86938	0.230697	-8.10319	5.35e-16	4.61e-15
xylR	828.495	0.707866	0.0875147	8.08854	6.04e-16	5.18e-15
aaeA	541.034	0.845754	0.104659	8.08101	6.42e-16	5.5e-15
hemN	383.913	0.973296	0.120539	8.07454	6.77e-16	5.79e-15
kbl	343.92	-1.04493	0.129428	-8.0735	6.83e-16	5.82e-15
yhjB	524.39	0.854209	0.106065	8.05361	8.04e-16	6.83e-15
nlpA	917.55	0.686056	0.085306	8.04229	8.82e-16	7.48e-15
ycfM	295.239	-1.11658	0.138994	-8.03331	9.49e-16	8.03e-15
yiiQ	508.544	0.86203	0.107401	8.02626	1e-15	8.48e-15
yjcP	524.62	0.85061	0.106031	8.02225	1.04e-15	8.74e-15
yeaE	493.284	-0.884892	0.110462	-8.01084	1.14e-15	9.57e-15
slyA	429.309	-0.936255	0.116925	-8.00734	1.17e-15	9.81e-15
yhcF	851.737	0.695287	0.0868319	8.00728	1.17e-15	9.81e-15
yeeO	61.6749	-2.77141	0.346359	-8.00156	1.23e-15	1.02e-14
rffG	466.564	0.888653	0.111119	7.99732	1.27e-15	1.06e-14
osmE	368.055	-1.00103	0.125314	-7.98816	1.37e-15	1.14e-14
ndh	83.8782	2.09251	0.262017	7.98616	1.39e-15	1.15e-14
yidL	1310.93	0.657618	0.0826198	7.95957	1.73e-15	1.43e-14
yijD	432.711	0.911043	0.114502	7.9566	1.77e-15	1.46e-14
yhjJ	604.157	0.792266	0.0996014	7.95437	1.8e-15	1.48e-14
clcB	694.962	-0.752119	0.0945639	-7.95355	1.81e-15	1.49e-14
yicH	1194.74	0.656446	0.0826976	7.93791	2.06e-15	1.68e-14
yhiL	850.634	0.689132	0.0868661	7.93326	2.13e-15	1.74e-14
yijE	522.546	0.841014	0.106193	7.9197	2.38e-15	1.94e-14
hcaT	333.212	-1.03746	0.131187	-7.90827	2.61e-15	2.12e-14
yajR	710.826	0.729482	0.0924145	7.89359	2.94e-15	2.38e-14
yoaB	1316.22	-0.65589	0.0832375	-7.87974	3.28e-15	2.65e-14
paaI	707.878	-0.737954	0.0937694	-7.86987	3.55e-15	2.87e-14
cobS	449.729	-0.901904	0.114632	-7.86785	3.61e-15	2.9e-14
rfaL	752.728	0.710374	0.090285	7.86813	3.6e-15	2.9e-14
ydgR	391.678	-0.955457	0.121612	-7.85657	3.95e-15	3.17e-14
ivbL	1021.66	0.656963	0.0837015	7.84888	4.2e-15	3.36e-14
nikE	420.662	0.908824	0.115808	7.84769	4.24e-15	3.38e-14
yihX	372.613	0.95811	0.122146	7.84396	4.37e-15	3.48e-14
cheR	1397.16	-0.652053	0.0831659	-7.84038	4.49e-15	3.56e-14
nuoA	1482.12	0.647276	0.0825546	7.84058	4.48e-15	3.56e-14
cutC	1206.64	-0.652926	0.0833623	-7.83238	4.79e-15	3.79e-14
yobF	1224.47	-0.651884	0.0833339	-7.82255	5.18e-15	4.09e-14
intQ	850.116	-0.68651	0.0878288	-7.81646	5.43e-15	4.28e-14
malI	440.416	-0.902975	0.115554	-7.81433	5.53e-15	4.34e-14
barA	572.237	-0.808608	0.103579	-7.80665	5.87e-15	4.6e-14
ydbH	923.166	-0.671947	0.0860822	-7.80589	5.91e-15	4.62e-14
yoaF	1107.64	-0.652629	0.0837084	-7.79646	6.37e-15	4.97e-14
rbsD	462.953	0.868171	0.11142	7.79185	6.6e-15	5.14e-14
yaaH	620.488	0.765783	0.0983423	7.78691	6.87e-15	5.34e-14
yeaD	484.123	-0.865684	0.111215	-7.78389	7.03e-15	5.45e-14
phoU	39.4711	3.4372	0.441634	7.78291	7.09e-15	5.48e-14
pinQ	534.669	-0.829841	0.106718	-7.77603	7.48e-15	5.78e-14
yecM	1605.45	-0.64549	0.0830189	-7.77522	7.53e-15	5.8e-14
yidQ	880.037	0.6695	0.0861094	7.775	7.54e-15	5.8e-14
gspA	459.647	0.868732	0.111743	7.77438	7.58e-15	5.81e-14
exbB	134.775	1.55626	0.200291	7.76995	7.85e-15	6.01e-14
yifO	414.546	0.904032	0.116491	7.76056	8.46e-15	6.46e-14
sgbU	606.971	0.769601	0.0993488	7.74646	9.45e-15	7.2e-14
ydfP	786.401	-0.694983	0.0898756	-7.73273	1.05e-14	8e-14
ynfF	736.89	-0.711974	0.0921333	-7.72765	1.1e-14	8.31e-14
trmA	477.917	0.849537	0.110001	7.72302	1.14e-14	8.6e-14
envC	118.449	-1.72788	0.224219	-7.70622	1.3e-14	9.79e-14
yhdN	590.423	0.775367	0.100638	7.70448	1.31e-14	9.9e-14
edd	826.116	-0.681511	0.0885035	-7.70039	1.36e-14	1.02e-13
kdgR	789.218	-0.690294	0.0897818	-7.68857	1.49e-14	1.12e-13
yeaR	1055.06	-0.646621	0.0841058	-7.68819	1.49e-14	1.12e-13
yiaN	308.385	-1.04439	0.135891	-7.6855	1.52e-14	1.14e-13
dppF	458.947	0.858642	0.111777	7.68173	1.57e-14	1.17e-13
yjaB	526.448	0.812274	0.105818	7.67617	1.64e-14	1.22e-13
yieK	472.381	0.847168	0.110495	7.66706	1.76e-14	1.31e-13
chpR	636.312	0.744563	0.09717	7.66248	1.82e-14	1.35e-13
yjcF	877.468	0.660214	0.0861655	7.66216	1.83e-14	1.35e-13
yjbD	608.347	0.759456	0.0992373	7.65293	1.96e-14	1.45e-13
mraW	78.5936	-2.18843	0.286427	-7.64046	2.16e-14	1.59e-13
ugpQ	659.295	0.73009	0.0955728	7.6391	2.19e-14	1.61e-13
yibJ	1040.32	0.636425	0.0834876	7.62298	2.48e-14	1.82e-13
rspA	761.848	-0.691578	0.0909086	-7.60739	2.8e-14	2.05e-13
yhjE	433.678	0.869344	0.114317	7.60469	2.86e-14	2.09e-13
cobT	465.998	-0.857634	0.112867	-7.59864	2.99e-14	2.18e-13
ypeC	1141.33	0.628718	0.0828022	7.593	3.13e-14	2.27e-13
dcuA	388.862	0.908227	0.119706	7.58714	3.27e-14	2.37e-13
yigF	316.244	0.996762	0.131529	7.57829	3.5e-14	2.54e-13
yeaC	718.028	-0.704581	0.0931078	-7.56736	3.81e-14	2.75e-13
prkB	438.948	0.860518	0.113765	7.56401	3.91e-14	2.82e-13
yeaO	1171.66	-0.630443	0.0833829	-7.56083	4.01e-14	2.88e-13
kgtP	378.661	0.91577	0.121138	7.55975	4.04e-14	2.9e-13
yhgG	301.06	1.01613	0.134471	7.5565	4.14e-14	2.97e-13
arpA	572.327	0.771211	0.102069	7.55582	4.16e-14	2.98e-13
yjbF	563.229	0.775682	0.102795	7.54591	4.49e-14	3.21e-13
ydjN	632.239	-0.742691	0.0987063	-7.52425	5.3e-14	3.78e-13
ynfN	705.815	-0.705271	0.0937773	-7.5207	5.45e-14	3.87e-13
pta	44.3124	2.93954	0.391224	7.51372	5.75e-14	4.08e-13
uhpB	507.713	0.805894	0.107365	7.50611	6.09e-14	4.31e-13
pabC	45.6704	-3.23841	0.433458	-7.4711	7.95e-14	5.62e-13
ycbJ	110.954	-1.73281	0.231978	-7.46972	8.04e-14	5.67e-13
bcsG	563.303	0.767684	0.10278	7.46921	8.07e-14	5.68e-13
ydfB	664.214	-0.719659	0.0963913	-7.46601	8.27e-14	5.81e-13
mtlD	1082.77	0.620269	0.0831132	7.46294	8.46e-14	5.93e-13
prfC	101.655	1.74193	0.23347	7.46103	8.58e-14	6e-13
yicE	897.88	0.63934	0.0856881	7.46124	8.57e-14	6e-13
yhbP	269.687	1.05221	0.141108	7.45677	8.87e-14	6.18e-13
yibG	1001.51	0.625651	0.0839121	7.45603	8.92e-14	6.2e-13
yoaC	1402.99	-0.618813	0.0831142	-7.44532	9.67e-14	6.71e-13
malK	730.532	0.679576	0.0913184	7.44183	9.93e-14	6.88e-13
slp	694.637	0.69421	0.0932987	7.44073	1e-13	6.92e-13
ugpE	548.797	0.771594	0.103949	7.4228	1.15e-13	7.91e-13
corA	276.673	1.03507	0.139513	7.41913	1.18e-13	8.12e-13
yobH	855.769	-0.649169	0.0875923	-7.41125	1.25e-13	8.6e-13
zntR	160.258	1.34976	0.18223	7.40692	1.29e-13	8.87e-13
wcaF	1027.32	-0.624788	0.0843549	-7.40666	1.3e-13	8.87e-13
gntK	359.739	0.916672	0.123957	7.39506	1.41e-13	9.66e-13
ldcC	812.041	0.650182	0.0879386	7.39359	1.43e-13	9.75e-13
yhiF	545.861	0.769849	0.104174	7.38999	1.47e-13	1e-12
ynaE	667.435	-0.710091	0.0961611	-7.38438	1.53e-13	1.04e-12
yebE	1194.68	-0.613804	0.0833128	-7.36747	1.74e-13	1.18e-12
yaiI	409.741	-0.876175	0.11894	-7.36654	1.75e-13	1.18e-12
ydeA	334.109	-0.962349	0.130636	-7.36662	1.75e-13	1.18e-12
nanE	577.957	0.746498	0.101566	7.34985	1.98e-13	1.34e-12
fumC	414.092	-0.86813	0.118356	-7.33491	2.22e-13	1.49e-12
rhaS	445.201	0.828852	0.113057	7.33128	2.28e-13	1.53e-12
yiiU	324.766	0.951091	0.129866	7.32361	2.41e-13	1.62e-12
dhaH	232.088	-1.12994	0.154523	-7.31247	2.62e-13	1.76e-12
yebK	314.912	-0.980714	0.13428	-7.30352	2.8e-13	1.87e-12
bcsC	556.728	0.754113	0.103309	7.29957	2.89e-13	1.92e-12
aceK	437.886	0.830347	0.113806	7.29619	2.96e-13	1.97e-12
yhfW	697.667	0.678424	0.0930969	7.28729	3.16e-13	2.1e-12
cbl	416.624	-0.859864	0.118044	-7.28426	3.23e-13	2.14e-12
astC	447.99	-0.833354	0.114502	-7.2781	3.39e-13	2.24e-12
blr	301.894	-0.995402	0.136823	-7.2751	3.46e-13	2.29e-12
yicO	986.118	0.611805	0.0841102	7.27385	3.49e-13	2.3e-12
gatY	1168.14	-0.605877	0.0833577	-7.2684	3.64e-13	2.39e-12
yjcQ	768.841	0.649302	0.0895145	7.25359	4.06e-13	2.67e-12
htrC	353.55	0.905283	0.124911	7.24742	4.25e-13	2.78e-12
aceA	416.13	0.840383	0.116191	7.23275	4.73e-13	3.1e-12
pphA	1477.13	-0.600337	0.0830454	-7.22902	4.86e-13	3.18e-12
mtlA	710.451	0.66758	0.0923797	7.22648	4.96e-13	3.23e-12
gltF	671.238	0.68437	0.0947208	7.22512	5.01e-13	3.25e-12
yiaV	874.639	0.622912	0.0862121	7.22533	5e-13	3.25e-12
relE	681.622	-0.687257	0.0951811	-7.22052	5.18e-13	3.35e-12
yidX	398.084	0.854853	0.11839	7.22067	5.17e-13	3.35e-12
yeaU	1118.19	-0.603014	0.0835531	-7.21713	5.31e-13	3.43e-12
phnB	881.59	0.620823	0.0860359	7.21586	5.36e-13	3.46e-12
yebR	959.412	-0.614936	0.0852854	-7.21033	5.58e-13	3.59e-12
glpE	925.144	0.613516	0.0851075	7.20872	5.65e-13	3.63e-12
rhlB	116.11	-1.61985	0.224812	-7.20536	5.79e-13	3.71e-12
yiaU	971.562	0.607043	0.0843174	7.1995	6.04e-13	3.87e-12
xylG	765.984	0.645104	0.0896476	7.196	6.2e-13	3.96e-12
smf	1049.97	0.59931	0.0833667	7.18884	6.53e-13	4.17e-12
ilvB	1014.48	0.601533	0.0837359	7.18369	6.79e-13	4.32e-12
ynfA	736.318	-0.660845	0.0920276	-7.18095	6.92e-13	4.4e-12
speG	1025.24	-0.604986	0.0843526	-7.17211	7.38e-13	4.68e-12
yhdY	595.462	0.718384	0.100163	7.17212	7.38e-13	4.68e-12
yegI	451.742	-0.817139	0.114066	-7.16376	7.85e-13	4.96e-12
yeaS	1114.86	-0.598593	0.083564	-7.16329	7.88e-13	4.97e-12
hslR	483.593	0.78296	0.109382	7.15804	8.18e-13	5.15e-12
dedA	386.764	-0.87168	0.121883	-7.15176	8.57e-13	5.39e-12
xylB	612.563	0.706912	0.098863	7.15042	8.65e-13	5.43e-12
yrbB	388.214	0.85575	0.119697	7.14928	8.72e-13	5.46e-12
aphA	401.813	0.842309	0.117881	7.14542	8.97e-13	5.61e-12
arsC	435.757	0.814051	0.113989	7.14147	9.23e-13	5.76e-12
frvB	346.615	0.899873	0.12603	7.14012	9.32e-13	5.81e-12
nac	418.203	-0.840001	0.117718	-7.1357	9.63e-13	5.99e-12
hdhA	431.846	-0.828687	0.116166	-7.13363	9.78e-13	6.07e-12
malP	383.595	0.856869	0.120322	7.12146	1.07e-12	6.62e-12
yoaG	1860.54	-0.588137	0.0826314	-7.1176	1.1e-12	6.78e-12
zraP	536.684	0.74649	0.10488	7.1176	1.1e-12	6.78e-12
sppA	317.137	-0.950691	0.133641	-7.11374	1.13e-12	6.96e-12
ycdR	229.98	-1.10168	0.154945	-7.11015	1.16e-12	7.13e-12
nuoJ	849.556	0.617091	0.0868151	7.1081	1.18e-12	7.23e-12
acrE	700.126	0.660146	0.0929529	7.10194	1.23e-12	7.54e-12
yebO	806.369	-0.632151	0.0890194	-7.10127	1.24e-12	7.57e-12
yobB	1379.66	-0.589993	0.0830914	-7.10053	1.24e-12	7.59e-12
yfgD	192.118	-1.20502	0.16975	-7.09877	1.26e-12	7.68e-12
aldB	863.271	0.613307	0.0864869	7.09132	1.33e-12	8.09e-12
ydfU	654.06	-0.687716	0.0970113	-7.08903	1.35e-12	8.21e-12
rdgC	735.251	-0.652559	0.0920635	-7.08814	1.36e-12	8.25e-12
lyxK	769.688	0.634244	0.0894886	7.08743	1.37e-12	8.28e-12
yebW	1159.17	-0.590082	0.0833549	-7.07916	1.45e-12	8.77e-12
ydfD	904.276	-0.611128	0.0863363	-7.07846	1.46e-12	8.8e-12
torY	1445.83	-0.587671	0.0830497	-7.07614	1.48e-12	8.92e-12
ydfH	591.369	-0.720051	0.101758	-7.07609	1.48e-12	8.92e-12
metA	483.98	0.77383	0.109364	7.07575	1.49e-12	8.93e-12
menA	302.735	0.946357	0.133987	7.06303	1.63e-12	9.77e-12
yegW	597.818	-0.713574	0.101234	-7.04873	1.81e-12	1.08e-11
yhhM	414.855	0.819517	0.11631	7.04596	1.84e-12	1.1e-11
yhcG	521.319	0.747766	0.106146	7.04467	1.86e-12	1.11e-11
yeeI	519.434	-0.759094	0.10776	-7.04429	1.86e-12	1.11e-11
yeaT	1278.13	-0.585223	0.0831675	-7.03668	1.97e-12	1.17e-11
alr	841.601	0.612305	0.0870426	7.03455	2e-12	1.19e-11
yieG	299.805	0.945731	0.134534	7.02966	2.07e-12	1.23e-11
atpI	280.447	0.973676	0.13854	7.02811	2.09e-12	1.24e-11
gspH	255.803	1.01082	0.144115	7.014	2.32e-12	1.37e-11
dppA	603.541	0.698146	0.0995415	7.01361	2.32e-12	1.37e-11
cheZ	1196.64	-0.583382	0.0832604	-7.00672	2.44e-12	1.44e-11
ibpA	1025.01	0.585443	0.0836067	7.00235	2.52e-12	1.48e-11
marA	548.787	-0.736567	0.105241	-6.99884	2.58e-12	1.51e-11
nagB	431.361	0.800349	0.114414	6.9952	2.65e-12	1.55e-11
glvG	916.949	0.596322	0.0852557	6.99452	2.66e-12	1.56e-11
phnJ	433.522	0.798635	0.114197	6.99347	2.68e-12	1.57e-11
ydjQ	481.736	-0.776305	0.111095	-6.98778	2.79e-12	1.63e-11
wcaD	1561.1	-0.579697	0.0829697	-6.98685	2.81e-12	1.64e-11
yrfB	577.218	0.709511	0.101587	6.98428	2.86e-12	1.66e-11
argC	427.119	0.801162	0.114865	6.97484	3.06e-12	1.77e-11
yhjD	530.964	0.734634	0.105327	6.9748	3.06e-12	1.77e-11
tonB	60.2722	2.17085	0.311367	6.97202	3.12e-12	1.81e-11
yhdT	535.074	0.731649	0.104988	6.96886	3.2e-12	1.84e-11
yijP	298.043	0.939828	0.134885	6.96763	3.22e-12	1.86e-11
eptA	509.557	0.745905	0.107126	6.96288	3.33e-12	1.92e-11
deaD	185.571	1.17175	0.168437	6.9566	3.49e-12	2e-11
rbsK	516.903	0.740596	0.106485	6.95492	3.53e-12	2.02e-11
tiaE	736.177	0.632766	0.0909939	6.95394	3.55e-12	2.03e-11
yhjG	551.648	0.720669	0.103659	6.9523	3.59e-12	2.05e-11
yfdI	188.843	-1.18915	0.171096	-6.95019	3.65e-12	2.08e-11
ycbG	82.7475	-1.88769	0.271848	-6.94394	3.81e-12	2.17e-11
livH	412.471	0.809061	0.116556	6.94142	3.88e-12	2.21e-11
pflD	289.842	0.947492	0.136556	6.9385	3.96e-12	2.25e-11
yecD	1675.72	-0.574998	0.0828686	-6.93867	3.96e-12	2.25e-11
yhiD	534.784	0.727312	0.105017	6.92569	4.34e-12	2.46e-11
hdeB	473.507	0.76358	0.110268	6.92475	4.37e-12	2.47e-11
frlD	485.771	0.755562	0.109146	6.92246	4.44e-12	2.5e-11
cheB	848.311	-0.607062	0.0877031	-6.92178	4.46e-12	2.51e-11
astA	518.171	-0.746	0.107813	-6.91937	4.54e-12	2.55e-11
rihB	240.784	-1.04711	0.151359	-6.91805	4.58e-12	2.57e-11
exoX	990.922	-0.585225	0.0847452	-6.9057	5e-12	2.8e-11
ydiH	484.749	-0.764417	0.110748	-6.90233	5.12e-12	2.86e-11
yghO	269.899	-0.989754	0.143587	-6.89309	5.46e-12	3.05e-11
nikB	708.929	0.637148	0.092446	6.89211	5.5e-12	3.07e-11
yjbA	621.014	0.676641	0.09821	6.88974	5.59e-12	3.11e-11
ydhR	386.643	-0.837122	0.121739	-6.87639	6.14e-12	3.41e-11
livG	540.701	0.717554	0.104539	6.864	6.7e-12	3.72e-11
glgC	319.586	0.896195	0.130654	6.85928	6.92e-12	3.84e-11
dgoT	894.425	0.587572	0.0857119	6.8552	7.12e-12	3.94e-11
yfeC	325.01	-0.903967	0.131945	-6.8511	7.33e-12	4.05e-11
pyrL	508.137	0.733092	0.107225	6.83695	8.09e-12	4.46e-11
ydgG	476.114	-0.761459	0.111512	-6.82848	8.58e-12	4.73e-11
yiaG	628.454	0.665447	0.0976556	6.81423	9.48e-12	5.21e-11
hisC	499.519	-0.744546	0.109376	-6.80724	9.95e-12	5.46e-11
dadA	445.913	-0.778655	0.114514	-6.79967	1.05e-11	5.75e-11
nrfC	779.237	0.604905	0.0890619	6.79196	1.11e-11	6.06e-11
leuA	577.058	0.689652	0.101575	6.78958	1.12e-11	6.15e-11
proC	1169.57	0.560936	0.0826915	6.78348	1.17e-11	6.4e-11
yhbX	347.519	0.852818	0.125745	6.78213	1.18e-11	6.45e-11
yibD	973.436	0.57122	0.0842773	6.77787	1.22e-11	6.64e-11
yegR	868.945	-0.588416	0.0871104	-6.75483	1.43e-11	7.77e-11
ydcS	590.079	-0.685567	0.101757	-6.73732	1.61e-11	8.75e-11
dgsA	456.812	-0.763499	0.113364	-6.73493	1.64e-11	8.88e-11
astB	482.291	-0.746684	0.110908	-6.73244	1.67e-11	9.02e-11
cbrA	826.545	0.58867	0.08746	6.73073	1.69e-11	9.11e-11
kefG	345.78	0.847666	0.126029	6.72594	1.74e-11	9.4e-11
tyrB	819.48	0.58958	0.0876603	6.72574	1.75e-11	9.4e-11
rssA	248.39	-1.0002	0.148873	-6.71853	1.84e-11	9.86e-11
rbbA	667.017	0.637907	0.0949761	6.7165	1.86e-11	9.99e-11
yhhY	568.94	0.686351	0.102221	6.71437	1.89e-11	1.01e-10
yadN	491.729	0.728137	0.108604	6.7045	2.02e-11	1.08e-10
damX	239.246	-1.01444	0.151448	-6.69824	2.11e-11	1.13e-10
yeaM	1701.74	-0.554522	0.0828186	-6.69562	2.15e-11	1.15e-10
yeaQ	1203.35	-0.556397	0.0832098	-6.68668	2.28e-11	1.22e-10
flhB	1525.6	-0.554403	0.0829608	-6.68271	2.35e-11	1.25e-10
ydaN	841.996	-0.586469	0.0878382	-6.67669	2.44e-11	1.3e-10
yhhX	426.313	0.767193	0.114915	6.67616	2.45e-11	1.3e-10
brnQ	1012.7	0.558205	0.0837336	6.66644	2.62e-11	1.39e-10
cpsB	662.944	-0.641749	0.096272	-6.666	2.63e-11	1.39e-10
fliQ	407.907	-0.791642	0.118767	-6.6655	2.64e-11	1.39e-10
ydjR	459.157	-0.753591	0.113109	-6.66251	2.69e-11	1.42e-10
eamA	619.693	-0.661481	0.0994075	-6.65424	2.85e-11	1.5e-10
btuC	263.502	-0.964432	0.144945	-6.65377	2.86e-11	1.5e-10
metE	325.497	0.861105	0.129522	6.64834	2.96e-11	1.55e-10
gst	275.55	-0.944518	0.142085	-6.64757	2.98e-11	1.56e-10
cedA	328.714	-0.871325	0.131119	-6.6453	3.03e-11	1.58e-10
mdtE	583.166	0.671536	0.101092	6.64285	3.08e-11	1.61e-10
ycjX	1040.29	-0.558274	0.0840962	-6.63851	3.17e-11	1.65e-10
tag	611.488	0.655419	0.0988809	6.62837	3.39e-11	1.77e-10
ycdC	256.087	-0.973185	0.146824	-6.62825	3.4e-11	1.77e-10
yecS	364.889	-0.827302	0.124893	-6.62408	3.49e-11	1.81e-10
yhfT	378.669	0.800982	0.120924	6.62383	3.5e-11	1.81e-10
rmuC	249.198	0.964181	0.145658	6.61947	3.6e-11	1.87e-10
frwB	433.258	0.755233	0.114138	6.61684	3.67e-11	1.9e-10
hchA	480.861	-0.734275	0.111017	-6.61407	3.74e-11	1.93e-10
yhfX	814.834	0.580591	0.0877935	6.61314	3.76e-11	1.94e-10
yneF	779.059	-0.594807	0.0899567	-6.61215	3.79e-11	1.95e-10
glvB	694.819	0.616314	0.0932358	6.61027	3.84e-11	1.97e-10
btuF	445.462	0.745885	0.112898	6.60673	3.93e-11	2.02e-10
asr	453.761	-0.750533	0.113649	-6.60393	4e-11	2.05e-10
lldD	637.948	0.640139	0.0969326	6.60396	4e-11	2.05e-10
phnC	789.859	0.585327	0.0886553	6.60228	4.05e-11	2.07e-10
pncA	420.011	-0.773823	0.117274	-6.59841	4.16e-11	2.12e-10
yidR	918.232	0.562101	0.0852099	6.59666	4.21e-11	2.14e-10
phnD	785.817	0.585448	0.0887953	6.59323	4.3e-11	2.19e-10
yhbH	277.438	-0.934002	0.141671	-6.59275	4.32e-11	2.19e-10
eptB	524.449	0.696797	0.105827	6.58428	4.57e-11	2.32e-10
yigG	291.528	0.895549	0.136021	6.58389	4.58e-11	2.32e-10
envR	676.716	0.620841	0.0943229	6.58208	4.64e-11	2.35e-10
ydiF	314.421	-0.880462	0.133845	-6.57823	4.76e-11	2.4e-10
ycgL	658.09	-0.63516	0.0965821	-6.57637	4.82e-11	2.43e-10
yodB	598.383	-0.663912	0.101019	-6.57216	4.96e-11	2.5e-10
rfaK	979.786	0.55178	0.0841608	6.55626	5.52e-11	2.77e-10
grxC	549.683	0.678566	0.103752	6.54025	6.14e-11	3.08e-10
yeiN	281.999	-0.919354	0.14058	-6.5397	6.16e-11	3.09e-10
erfK	450.674	-0.744807	0.113898	-6.53923	6.18e-11	3.1e-10
dgoD	313.562	0.860707	0.131673	6.53671	6.29e-11	3.14e-10
yihR	347.912	0.821041	0.125634	6.53516	6.35e-11	3.17e-10
ynfO	801.431	-0.582027	0.0890772	-6.53396	6.41e-11	3.19e-10
ydeP	437.531	-0.752842	0.115268	-6.53124	6.52e-11	3.25e-10
yniD	247.444	-0.971069	0.148906	-6.52136	6.97e-11	3.46e-10
yhcD	682.512	0.611921	0.0939537	6.51301	7.37e-11	3.66e-10
alsE	730.345	0.594325	0.0912706	6.51168	7.43e-11	3.68e-10
gltD	657.845	0.622078	0.0955487	6.51058	7.49e-11	3.71e-10
gadX	306.826	0.865272	0.132959	6.50782	7.63e-11	3.77e-10
ydaY	696.299	-0.612002	0.0940982	-6.50387	7.83e-11	3.86e-10
uhpA	838.758	0.566386	0.0870962	6.503	7.87e-11	3.88e-10
rtcA	401.933	0.765702	0.117751	6.50272	7.89e-11	3.88e-10
yehI	630.775	-0.640464	0.0985062	-6.50176	7.94e-11	3.9e-10
ggt	461.485	0.72256	0.111328	6.49035	8.56e-11	4.2e-10
bcsF	604.632	0.644581	0.0993819	6.4859	8.82e-11	4.32e-10
metF	323.839	0.840865	0.129755	6.48041	9.15e-11	4.48e-10
gadW	442.418	0.733216	0.113194	6.4775	9.33e-11	4.56e-10
galR	733.656	-0.595624	0.0920091	-6.47353	9.57e-11	4.67e-10
nikC	550.739	0.670082	0.103652	6.46475	1.01e-10	4.95e-10
yfaE	124.438	1.33773	0.206952	6.46396	1.02e-10	4.96e-10
yieN	411.225	0.753523	0.116573	6.46396	1.02e-10	4.96e-10
yibH	923.573	0.550028	0.085107	6.46278	1.03e-10	4.99e-10
yjbI	620.851	0.634218	0.0981631	6.46086	1.04e-10	5.05e-10
yraM	221.985	-1.0129	0.156852	-6.45768	1.06e-10	5.15e-10
yebQ	1216.46	-0.536748	0.083167	-6.45386	1.09e-10	5.27e-10
yeiG	619.274	-0.641199	0.0993549	-6.45362	1.09e-10	5.27e-10
kefB	298.549	0.866974	0.134552	6.44342	1.17e-10	5.63e-10
yneG	631.959	-0.634014	0.09842	-6.44192	1.18e-10	5.68e-10
yhfA	435.216	0.733045	0.113906	6.43555	1.23e-10	5.92e-10
malM	619.118	0.632509	0.098297	6.43467	1.24e-10	5.94e-10
yebS	1453.76	-0.533738	0.0829781	-6.43227	1.26e-10	6.03e-10
yjbG	659.828	0.613594	0.095407	6.43133	1.26e-10	6.06e-10
yihL	207.597	1.02085	0.158766	6.42988	1.28e-10	6.11e-10
ydfW	741.214	-0.588568	0.0916121	-6.42457	1.32e-10	6.32e-10
lldR	819.334	0.562091	0.0876624	6.412	1.44e-10	6.84e-10
nrfD	689.693	0.599616	0.0935151	6.41197	1.44e-10	6.84e-10
cheY	911.769	-0.551607	0.086065	-6.40919	1.46e-10	6.96e-10
wcaI	701.094	-0.600946	0.0937886	-6.40746	1.48e-10	7.03e-10
uidA	357.79	-0.80632	0.125897	-6.40459	1.51e-10	7.15e-10
ampD	333.754	0.819394	0.127978	6.40261	1.53e-10	7.24e-10
gshA	263.345	-0.926535	0.144734	-6.40165	1.54e-10	7.27e-10
yiaT	484.121	0.697688	0.109222	6.38778	1.68e-10	7.95e-10
yjbL	775.622	0.569492	0.0891929	6.38495	1.71e-10	8.09e-10
yheT	262.516	0.907973	0.142229	6.38386	1.73e-10	8.14e-10
manX	721.776	-0.590856	0.0926205	-6.37932	1.78e-10	8.37e-10
ycgF	639.698	-0.623525	0.0978343	-6.37327	1.85e-10	8.7e-10
ymgB	477.95	-0.708374	0.111191	-6.3708	1.88e-10	8.83e-10
dmsD	614.547	-0.635059	0.0997033	-6.36949	1.9e-10	8.89e-10
livF	527.462	0.672203	0.10556	6.368	1.92e-10	8.96e-10
lysP	1182.4	0.526185	0.082652	6.36627	1.94e-10	9.05e-10
rfaS	817.113	0.558299	0.087701	6.36593	1.94e-10	9.06e-10
yidB	361.837	0.785091	0.123351	6.36469	1.96e-10	9.12e-10
yoaD	1270.06	-0.528807	0.0830918	-6.36414	1.96e-10	9.14e-10
ydhZ	515.989	-0.685839	0.107785	-6.36301	1.98e-10	9.2e-10
rpoZ	1043.72	0.529714	0.0833933	6.352	2.13e-10	9.87e-10
arsR	674.429	0.599864	0.0944424	6.35164	2.13e-10	9.88e-10
yecN	1192.21	-0.527939	0.0831918	-6.34605	2.21e-10	1.02e-09
flxA	652.505	-0.614632	0.0969172	-6.34182	2.27e-10	1.05e-09
yedK	548.141	-0.666354	0.105075	-6.34168	2.27e-10	1.05e-09
sufE	596.47	0.633399	0.0999986	6.33408	2.39e-10	1.1e-09
rbsR	354.483	0.788478	0.124518	6.33225	2.42e-10	1.11e-09
ilvH	497.194	0.683907	0.108073	6.32819	2.48e-10	1.14e-09
yjbB	549.392	0.656298	0.10374	6.32639	2.51e-10	1.15e-09
cspF	548.569	-0.664001	0.105025	-6.32229	2.58e-10	1.18e-09
phnI	705.893	0.584864	0.0925539	6.31917	2.63e-10	1.21e-09
yebG	870.115	-0.549816	0.087012	-6.31885	2.64e-10	1.21e-09
gapA	492.811	-0.693725	0.109794	-6.31841	2.64e-10	1.21e-09
yjcB	307.546	0.837689	0.132785	6.3086	2.82e-10	1.29e-09
ynfD	879.409	-0.5474	0.0867776	-6.30808	2.83e-10	1.29e-09
frvX	341.736	0.797281	0.126592	6.29805	3.01e-10	1.37e-09
marC	477.52	-0.700339	0.111197	-6.29821	3.01e-10	1.37e-09
yrfF	565.358	0.644087	0.102462	6.28611	3.26e-10	1.48e-09
rffM	222.927	0.961298	0.153119	6.27812	3.43e-10	1.55e-09
aslA	235.137	0.935096	0.149336	6.26169	3.81e-10	1.73e-09
rstA	369.495	-0.775394	0.123967	-6.25485	3.98e-10	1.8e-09
gatZ	784.594	-0.560125	0.0896519	-6.24777	4.16e-10	1.88e-09
rem	592.214	-0.633283	0.101434	-6.24327	4.29e-10	1.93e-09
yhiJ	502.007	0.671972	0.107669	6.24112	4.34e-10	1.96e-09
yjcE	740.859	0.565672	0.0907176	6.23553	4.5e-10	2.02e-09
yrbC	294.115	0.843989	0.135349	6.23563	4.5e-10	2.02e-09
yjbM	487.074	0.678916	0.108958	6.23099	4.64e-10	2.08e-09
yebB	1420.8	-0.516236	0.0829767	-6.22146	4.93e-10	2.21e-09
frlB	221.118	0.955514	0.153705	6.21653	5.08e-10	2.28e-09
ycbZ	235.951	0.925851	0.149085	6.21024	5.29e-10	2.37e-09
yiaJ	728.447	0.566895	0.0913449	6.20609	5.43e-10	2.43e-09
aaeX	430.122	0.709936	0.114412	6.20507	5.47e-10	2.44e-09
ydeE	602.564	-0.624289	0.100607	-6.20522	5.46e-10	2.44e-09
pepA	626.484	0.606106	0.0977269	6.20204	5.57e-10	2.48e-09
yhjA	455.577	0.692876	0.111836	6.19548	5.81e-10	2.58e-09
ydjK	495.981	-0.677993	0.109487	-6.19243	5.92e-10	2.63e-09
yecT	1048.36	-0.519549	0.0839433	-6.18929	6.04e-10	2.68e-09
yeaK	483.623	-0.684424	0.110606	-6.18796	6.09e-10	2.7e-09
yhhJ	669.855	0.586094	0.094736	6.18661	6.15e-10	2.72e-09
wzxE	297.405	0.832769	0.134744	6.18038	6.39e-10	2.82e-09
uidC	464.649	-0.694266	0.112358	-6.17907	6.45e-10	2.84e-09
mdtC	787.722	-0.552906	0.0895144	-6.17672	6.54e-10	2.88e-09
ydhK	323.481	-0.814074	0.131794	-6.17686	6.54e-10	2.88e-09
ydeJ	785.176	-0.553438	0.0896239	-6.17511	6.61e-10	2.91e-09
yeiS	1014.84	-0.52065	0.0843219	-6.17455	6.64e-10	2.91e-09
yhiK	434.329	0.7033	0.113947	6.17216	6.74e-10	2.95e-09
ynjC	565.947	-0.638282	0.103549	-6.16408	7.09e-10	3.1e-09
yrfC	396.289	0.729819	0.118403	6.16387	7.1e-10	3.1e-09
hokA	668.414	0.584313	0.0948403	6.16103	7.23e-10	3.16e-09
wbbJ	493.171	-0.6756	0.109719	-6.15755	7.39e-10	3.22e-09
vsr	625.522	-0.608436	0.0988322	-6.15625	7.45e-10	3.24e-09
trpC	20.748	4.62998	0.752183	6.15539	7.49e-10	3.26e-09
yiaW	527.775	0.64815	0.105506	6.14325	8.08e-10	3.51e-09
dacD	549.646	-0.643428	0.104882	-6.13476	8.53e-10	3.7e-09
hdeA	498.97	0.661859	0.107904	6.13378	8.58e-10	3.72e-09
ydiM	359.148	-0.769967	0.125534	-6.13352	8.6e-10	3.72e-09
yeeS	648.522	-0.595772	0.0971493	-6.13255	8.65e-10	3.74e-09
yrfG	603.589	0.609474	0.0994259	6.12993	8.79e-10	3.8e-09
yieH	264.55	0.867776	0.141672	6.12524	9.05e-10	3.91e-09
paaH	937.869	-0.52344	0.0854993	-6.12216	9.23e-10	3.98e-09
ycgG	680.17	-0.58126	0.0949927	-6.11899	9.42e-10	4.05e-09
fliH	294.697	-0.841076	0.1375	-6.11693	9.54e-10	4.1e-09
ydfT	623.257	-0.604772	0.0989853	-6.10971	9.98e-10	4.28e-09
pioO	204.564	0.975043	0.159664	6.10685	1.02e-09	4.35e-09
yiaY	1063.96	0.508148	0.0832085	6.10692	1.02e-09	4.35e-09
dgoR	317.595	0.797891	0.130838	6.0983	1.07e-09	4.59e-09
yecC	282.398	-0.854089	0.140123	-6.09527	1.09e-09	4.67e-09
fbaB	785.292	-0.545841	0.0895888	-6.09273	1.11e-09	4.74e-09
abgR	693.694	-0.573326	0.0941581	-6.08897	1.14e-09	4.84e-09
ydfX	635.08	-0.596921	0.0980999	-6.08483	1.17e-09	4.96e-09
cpxR	495.513	0.658208	0.108197	6.08341	1.18e-09	5e-09
ysdC	289.545	0.828996	0.13627	6.08346	1.18e-09	5e-09
acpT	460.165	0.675956	0.111378	6.06905	1.29e-09	5.46e-09
speF	677.524	-0.577332	0.0951552	-6.06727	1.3e-09	5.51e-09
yaeB	549.983	0.628552	0.103672	6.06288	1.34e-09	5.66e-09
tam	787.377	-0.542443	0.0895187	-6.05955	1.37e-09	5.77e-09
sgbH	1058.57	0.504314	0.083235	6.05891	1.37e-09	5.78e-09
aaeR	494.821	0.655506	0.108236	6.05626	1.39e-09	5.87e-09
ydbL	894.24	-0.523206	0.086395	-6.05597	1.4e-09	5.88e-09
yniC	365.936	-0.753455	0.124471	-6.05325	1.42e-09	5.97e-09
bglB	356.812	0.750415	0.124065	6.04857	1.46e-09	6.14e-09
ynfP	604.085	-0.607499	0.100444	-6.04813	1.47e-09	6.15e-09
bcsZ	403.542	0.710185	0.117451	6.04667	1.48e-09	6.2e-09
yhhA	467.844	0.668754	0.110678	6.04236	1.52e-09	6.36e-09
miaB	194.987	-1.00807	0.166958	-6.03788	1.56e-09	6.53e-09
nuoC	701.717	0.559451	0.0927773	6.03004	1.64e-09	6.84e-09
nudH	50.1542	-2.17486	0.36074	-6.02887	1.65e-09	6.89e-09
nudG	465.072	-0.676828	0.112282	-6.02795	1.66e-09	6.92e-09
yrfD	586.489	0.607258	0.100761	6.0267	1.67e-09	6.96e-09
wbbH	749.853	-0.548772	0.0911086	-6.02327	1.71e-09	7.1e-09
bcsE	355.233	0.748697	0.124338	6.02147	1.73e-09	7.17e-09
yfcE	283.1	-0.842402	0.139901	-6.02143	1.73e-09	7.17e-09
yrdA	590.859	0.604531	0.100409	6.02068	1.74e-09	7.19e-09
sgcE	931.274	0.511381	0.0849434	6.02025	1.74e-09	7.2e-09
yhjY	698.492	0.559311	0.0929771	6.01558	1.79e-09	7.41e-09
nudD	1051.96	-0.504573	0.0838916	-6.01458	1.8e-09	7.44e-09
yneJ	545.753	-0.63184	0.10516	-6.00834	1.87e-09	7.73e-09
yhcM	484.07	0.655469	0.10918	6.00356	1.93e-09	7.95e-09
yeaH	527.778	-0.640175	0.106664	-6.00178	1.95e-09	8.03e-09
mpaA	845.696	-0.525797	0.0876142	-6.00127	1.96e-09	8.04e-09
ydcJ	829.385	-0.528576	0.0880821	-6.00095	1.96e-09	8.05e-09
yjbJ	643.343	0.579103	0.096508	6.00057	1.97e-09	8.06e-09
nuoB	724.859	0.548743	0.0914843	5.99822	1.99e-09	8.17e-09
sgrR	543.922	0.624749	0.104164	5.99775	2e-09	8.18e-09
yniB	338.961	-0.772815	0.128863	-5.99719	2.01e-09	8.2e-09
tynA	992.941	-0.507202	0.0845823	-5.99656	2.02e-09	8.22e-09
paaB	798.264	-0.533666	0.0890839	-5.9906	2.09e-09	8.52e-09
livM	358.203	0.741933	0.123855	5.99032	2.09e-09	8.52e-09
wcaJ	513.933	-0.645999	0.107855	-5.98952	2.1e-09	8.55e-09
yohO	633.508	-0.587911	0.0981707	-5.98866	2.12e-09	8.59e-09
arsB	435.659	0.681527	0.113813	5.98814	2.12e-09	8.61e-09
hisH	554.049	-0.625393	0.104448	-5.98758	2.13e-09	8.62e-09
paaF	966.358	-0.50888	0.0849868	-5.98776	2.13e-09	8.62e-09
cspC	1074.57	-0.500942	0.0836776	-5.98657	2.14e-09	8.66e-09
feoA	416.108	0.693945	0.115928	5.98598	2.15e-09	8.68e-09
btuE	314.383	-0.797476	0.133371	-5.9794	2.24e-09	9.03e-09
uvrY	234.989	-0.908233	0.151928	-5.97804	2.26e-09	9.1e-09
ydfQ	542.849	-0.629652	0.105411	-5.97329	2.33e-09	9.35e-09
ydjJ	467.351	-0.669013	0.11202	-5.97228	2.34e-09	9.4e-09
hokD	440.412	-0.685004	0.114725	-5.97083	2.36e-09	9.46e-09
ogrK	855.709	-0.52146	0.0873342	-5.97086	2.36e-09	9.46e-09
yeaN	1039.62	-0.50153	0.0840003	-5.97057	2.36e-09	9.47e-09
proB	606.826	0.591977	0.0991801	5.9687	2.39e-09	9.57e-09
yeeZ	470.657	-0.66656	0.11169	-5.96793	2.4e-09	9.6e-09
yeaP	1258.2	-0.495343	0.083059	-5.96375	2.47e-09	9.84e-09
frvA	316.69	0.780913	0.130952	5.96338	2.47e-09	9.85e-09
yiiD	189.972	0.987377	0.165674	5.95977	2.53e-09	1.01e-08
ynbE	605.928	-0.597534	0.100274	-5.95904	2.54e-09	1.01e-08
ydfZ	543.023	-0.627661	0.105381	-5.95611	2.58e-09	1.03e-08
cls	608.538	0.589412	0.0990349	5.95156	2.66e-09	1.05e-08
aaeB	490.366	0.646363	0.108614	5.951	2.67e-09	1.06e-08
ymjA	366.921	-0.739081	0.124215	-5.95004	2.68e-09	1.06e-08
yehC	552.461	-0.621427	0.104593	-5.94136	2.83e-09	1.12e-08
metR	278.627	0.822529	0.138545	5.93693	2.9e-09	1.15e-08
nanT	389.541	0.707379	0.11923	5.93288	2.98e-09	1.17e-08
ydiU	266.78	-0.851468	0.143518	-5.93282	2.98e-09	1.17e-08
bcr	457.115	-0.6704	0.113016	-5.9319	2.99e-09	1.18e-08
ugpB	798.781	0.52357	0.0882924	5.92996	3.03e-09	1.19e-08
shiA	456.846	-0.669829	0.113035	-5.92583	3.11e-09	1.22e-08
yddK	604.166	-0.59494	0.100403	-5.92552	3.11e-09	1.22e-08
glpD	2972.46	0.464887	0.0786277	5.91251	3.37e-09	1.32e-08
upp	340.907	-0.758595	0.128459	-5.90535	3.52e-09	1.38e-08
cobU	547.603	-0.619684	0.104974	-5.90321	3.56e-09	1.39e-08
hslJ	1033.64	-0.496117	0.084064	-5.90166	3.6e-09	1.41e-08
ycjM	702.097	-0.551915	0.0936256	-5.89491	3.75e-09	1.46e-08
yabI	396.709	0.697225	0.118303	5.89356	3.78e-09	1.47e-08
sohB	251.596	-0.867215	0.147192	-5.89173	3.82e-09	1.49e-08
aroH	65.5633	-1.7839	0.302921	-5.88899	3.89e-09	1.51e-08
greA	28.8304	-3.25068	0.552426	-5.88437	4e-09	1.55e-08
wzxC	362.471	-0.733826	0.124893	-5.87564	4.21e-09	1.63e-08
yneI	455.721	-0.664274	0.113114	-5.87259	4.29e-09	1.66e-08
uxaB	509.71	-0.634967	0.108169	-5.87016	4.35e-09	1.69e-08
yhfU	376.309	0.710697	0.121087	5.8693	4.38e-09	1.69e-08
xylH	490.49	0.637241	0.108603	5.8676	4.42e-09	1.71e-08
ydhA	300.907	-0.79809	0.136036	-5.86674	4.44e-09	1.72e-08
yhjR	574.248	0.596135	0.1017	5.86168	4.58e-09	1.77e-08
ddpB	689.666	-0.552382	0.0943624	-5.85383	4.8e-09	1.85e-08
yiaC	509.402	0.626206	0.107	5.85238	4.85e-09	1.86e-08
ygjF	615.825	0.575676	0.0984887	5.8451	5.06e-09	1.95e-08
speA	43.064	-2.31215	0.395749	-5.84245	5.14e-09	1.97e-08
hisA	782.351	-0.523634	0.0896509	-5.84081	5.19e-09	1.99e-08
gpt	204.427	0.930613	0.159489	5.83498	5.38e-09	2.06e-08
otsA	462.141	-0.656265	0.112506	-5.83318	5.44e-09	2.08e-08
ydfV	475.69	0.640923	0.109905	5.83159	5.49e-09	2.1e-08
stfR	791.994	-0.520612	0.0892883	-5.83068	5.52e-09	2.11e-08
ycjG	1181.82	-0.484502	0.0831427	-5.82735	5.63e-09	2.15e-08
gadE	296.477	0.783447	0.134829	5.81066	6.22e-09	2.37e-08
baeR	667.989	-0.555734	0.0957369	-5.8048	6.44e-09	2.45e-08
yecO	1147.88	-0.482783	0.0832375	-5.80006	6.63e-09	2.52e-08
yjbR	617.644	0.569882	0.0983564	5.79405	6.87e-09	2.61e-08
paaE	535.301	-0.613708	0.105967	-5.79153	6.97e-09	2.65e-08
bioC	14.2792	7.58199	1.3094	5.79044	7.02e-09	2.66e-08
mobB	408.385	0.676409	0.116815	5.79044	7.02e-09	2.66e-08
yneH	474.896	-0.643161	0.111272	-5.78009	7.47e-09	2.82e-08
yciS	232.036	-0.881938	0.1528	-5.77185	7.84e-09	2.96e-08
ydiB	463.421	-0.648171	0.112334	-5.77004	7.93e-09	2.99e-08
hdeD	424	0.663451	0.115026	5.76784	8.03e-09	3.02e-08
ycjF	765.221	-0.521157	0.090353	-5.768	8.02e-09	3.02e-08
ydfG	403.422	-0.684326	0.118885	-5.75621	8.6e-09	3.24e-08
ydiQ	265.612	-0.826891	0.143665	-5.75568	8.63e-09	3.24e-08
yecA	396.694	-0.689149	0.119782	-5.75337	8.75e-09	3.28e-08
rhsE	582.723	-0.587088	0.102059	-5.75245	8.8e-09	3.3e-08
fabR	267.651	0.809895	0.140806	5.75185	8.83e-09	3.31e-08
ftn	432.996	-0.663936	0.115441	-5.7513	8.86e-09	3.31e-08
rstB	433.211	-0.663761	0.115434	-5.75014	8.92e-09	3.33e-08
yjdA	504.636	0.617375	0.107374	5.74979	8.94e-09	3.34e-08
ydgK	322.129	-0.75754	0.131791	-5.74803	9.03e-09	3.37e-08
frlC	449.943	0.645062	0.112347	5.74169	9.37e-09	3.49e-08
ydiN	435.856	-0.66082	0.115089	-5.7418	9.37e-09	3.49e-08
ebgC	809.626	0.504773	0.0879274	5.74079	9.42e-09	3.5e-08
yihT	321.829	0.745219	0.129935	5.73531	9.73e-09	3.61e-08
paaC	704.829	-0.535599	0.0934247	-5.73295	9.87e-09	3.66e-08
ydeI	535.718	-0.60723	0.105924	-5.73268	9.89e-09	3.66e-08
yhhH	492.855	0.621088	0.108393	5.72996	1e-08	3.72e-08
astE	437.281	-0.65868	0.114966	-5.72936	1.01e-08	3.73e-08
yaeH	410.687	0.667267	0.11654	5.72563	1.03e-08	3.81e-08
php	492.247	0.62079	0.108462	5.72357	1.04e-08	3.85e-08
cspI	504.493	-0.621308	0.108567	-5.72279	1.05e-08	3.86e-08
wbbI	655.541	-0.551873	0.0965465	-5.71614	1.09e-08	4.01e-08
ydfC	740.59	-0.522818	0.091506	-5.71348	1.11e-08	4.07e-08
yecE	1524.44	-0.47339	0.0828702	-5.71242	1.11e-08	4.09e-08
adiC	529.314	0.600577	0.10531	5.70295	1.18e-08	4.32e-08
gspG	234.355	0.851087	0.149333	5.69925	1.2e-08	4.41e-08
rrmA	816.064	-0.503685	0.0884348	-5.69556	1.23e-08	4.5e-08
yeaA	280.156	-0.799236	0.140328	-5.69549	1.23e-08	4.5e-08
yigA	301.986	0.761044	0.133664	5.69372	1.24e-08	4.54e-08
slyD	278.851	0.787995	0.138422	5.6927	1.25e-08	4.57e-08
ydhX	528.848	-0.605287	0.106468	-5.68518	1.31e-08	4.77e-08
yeeV	428.237	-0.658083	0.115924	-5.67683	1.37e-08	5e-08
lit	592.322	-0.574201	0.101265	-5.6703	1.43e-08	5.19e-08
cspB	494.029	-0.620424	0.109467	-5.6677	1.45e-08	5.26e-08
yebV	1408.74	-0.469928	0.0829213	-5.66716	1.45e-08	5.27e-08
ydjG	437.4	-0.65115	0.114931	-5.66557	1.47e-08	5.32e-08
ydeU	599.314	-0.570405	0.1007	-5.6644	1.48e-08	5.35e-08
yegD	779.811	-0.507849	0.0897432	-5.65892	1.52e-08	5.52e-08
phnM	272.557	0.789992	0.139765	5.65229	1.58e-08	5.73e-08
nudC	440.563	0.639933	0.113248	5.65072	1.6e-08	5.77e-08
yebT	943.097	-0.481855	0.08532	-5.64762	1.63e-08	5.87e-08
ygeX	769.823	0.504331	0.0893793	5.64259	1.68e-08	6.04e-08
ydbK	673.148	-0.537866	0.0953642	-5.64012	1.7e-08	6.12e-08
rfbB	499.434	-0.614432	0.108968	-5.63866	1.71e-08	6.17e-08
ydfE	581.09	-0.575043	0.102178	-5.62785	1.82e-08	6.56e-08
ydhY	589.067	-0.571283	0.101513	-5.62769	1.83e-08	6.56e-08
dcp	362.151	-0.702131	0.124813	-5.62544	1.85e-08	6.64e-08
yiaH	386.849	0.6725	0.119552	5.62516	1.85e-08	6.64e-08
dicB	518.997	-0.603421	0.107286	-5.62441	1.86e-08	6.67e-08
dicC	643.716	-0.54642	0.0973659	-5.61203	2e-08	7.15e-08
amyA	340.129	-0.720579	0.128465	-5.60914	2.03e-08	7.27e-08
nuoN	964.218	0.472946	0.0843491	5.607	2.06e-08	7.35e-08
yheS	357.79	0.69361	0.123818	5.60187	2.12e-08	7.56e-08
btuB	445.052	0.630898	0.112778	5.59419	2.22e-08	7.9e-08
yedX	426.131	-0.649497	0.11611	-5.59383	2.22e-08	7.91e-08
torZ	1793.7	-0.462046	0.082615	-5.59276	2.23e-08	7.95e-08
dctA	159.288	1.01104	0.180881	5.58951	2.28e-08	8.09e-08
paaD	659.23	-0.537737	0.0962619	-5.58618	2.32e-08	8.24e-08
yjhR	534.027	0.585725	0.104936	5.58174	2.38e-08	8.44e-08
yehM	602.763	-0.560347	0.100413	-5.58042	2.4e-08	8.5e-08
hisB	400.234	-0.665288	0.119254	-5.57873	2.42e-08	8.56e-08
iclR	224.724	0.849268	0.152234	5.57871	2.42e-08	8.56e-08
flhA	1444.44	-0.462369	0.0828994	-5.57747	2.44e-08	8.62e-08
yidI	806.22	0.489514	0.0880319	5.56064	2.69e-08	9.48e-08
yibT	343.242	0.701348	0.126167	5.55888	2.72e-08	9.57e-08
yebY	1054.85	-0.465796	0.0837988	-5.5585	2.72e-08	9.58e-08
ldhA	440.35	-0.63663	0.114585	-5.55595	2.76e-08	9.71e-08
sbmC	676.123	-0.52786	0.0951454	-5.54793	2.89e-08	1.01e-07
yhjX	570.688	0.565778	0.101981	5.54785	2.89e-08	1.01e-07
yjcC	844.843	0.481667	0.086886	5.54367	2.96e-08	1.04e-07
malT	451.033	0.621435	0.112175	5.53989	3.03e-08	1.06e-07
bioH	19.389	7.05314	1.27373	5.53739	3.07e-08	1.07e-07
ydaO	896.492	-0.4771	0.0862562	-5.5312	3.18e-08	1.11e-07
dsrB	303.92	-0.747511	0.135155	-5.53079	3.19e-08	1.11e-07
agaB	365.86	0.677866	0.12259	5.52955	3.21e-08	1.12e-07
sdaB	431.413	-0.638624	0.115511	-5.52868	3.23e-08	1.12e-07
yedR	426.882	-0.641477	0.116043	-5.52794	3.24e-08	1.13e-07
dcuR	626.682	0.53965	0.0976628	5.52565	3.28e-08	1.14e-07
nadC	19.1396	7.03563	1.27502	5.51807	3.43e-08	1.19e-07
paaX	605.007	-0.552961	0.100241	-5.5163	3.46e-08	1.2e-07
yjcD	497.747	0.595301	0.107948	5.51472	3.49e-08	1.21e-07
bax	529.841	0.580181	0.105269	5.5114	3.56e-08	1.23e-07
yihQ	293.537	0.746077	0.13538	5.51099	3.57e-08	1.23e-07
manY	938.642	-0.470479	0.0853948	-5.50946	3.6e-08	1.24e-07
nikA	593.979	0.551686	0.100137	5.50931	3.6e-08	1.24e-07
yddA	638.244	-0.538484	0.0977359	-5.50959	3.6e-08	1.24e-07
cysJ	23.4338	-3.55543	0.646116	-5.50278	3.74e-08	1.29e-07
ydaG	358.786	-0.689033	0.125275	-5.50015	3.79e-08	1.31e-07
cysN	49.7783	-1.94837	0.354337	-5.49864	3.83e-08	1.32e-07
ymfM	247.894	-0.812478	0.147862	-5.49485	3.91e-08	1.34e-07
yieM	280.854	0.757522	0.137913	5.49274	3.96e-08	1.36e-07
hipB	633.182	-0.538029	0.0980991	-5.48454	4.15e-08	1.42e-07
proA	418.935	0.632995	0.11556	5.47761	4.31e-08	1.48e-07
paaJ	926.044	-0.468296	0.0856184	-5.46958	4.51e-08	1.54e-07
wcaC	604.771	-0.547836	0.10023	-5.46578	4.61e-08	1.58e-07
rpiB	729.838	0.498592	0.0912296	5.46524	4.62e-08	1.58e-07
chbC	478.71	-0.605293	0.110774	-5.46423	4.65e-08	1.59e-07
fliM	224.893	-0.845602	0.154754	-5.46417	4.65e-08	1.59e-07
ynbB	329.091	-0.711021	0.13033	-5.45554	4.88e-08	1.66e-07
ydgA	341.123	-0.699166	0.128189	-5.4542	4.92e-08	1.67e-07
yddW	612.157	-0.54329	0.0996706	-5.45085	5.01e-08	1.7e-07
yedP	460.735	-0.612739	0.112471	-5.44798	5.09e-08	1.73e-07
ompG	991.413	-0.46008	0.084529	-5.44286	5.24e-08	1.78e-07
dos	739.824	-0.497459	0.0914823	-5.43776	5.4e-08	1.83e-07
sufD	516.121	0.577778	0.106402	5.43013	5.63e-08	1.91e-07
ydcU	383.39	-0.659826	0.121508	-5.43029	5.63e-08	1.91e-07
paaA	451.221	-0.6153	0.113403	-5.42577	5.77e-08	1.95e-07
yhiN	864.693	0.468114	0.0863554	5.42079	5.93e-08	2e-07
ydiZ	254.835	-0.790996	0.14601	-5.41742	6.05e-08	2.04e-07
nrfE	542.528	0.564149	0.104226	5.41275	6.21e-08	2.09e-07
sfcA	846.557	-0.473262	0.0874922	-5.40919	6.33e-08	2.13e-07
yhdA	677.859	0.509174	0.0941851	5.4061	6.44e-08	2.17e-07
phnO	689.567	0.50507	0.0934448	5.405	6.48e-08	2.18e-07
trg	372.845	-0.665288	0.123095	-5.40467	6.49e-08	2.18e-07
topB	329.314	-0.703729	0.13026	-5.40251	6.57e-08	2.21e-07
kbaZ	349.226	0.676049	0.125145	5.40212	6.59e-08	2.21e-07
yigE	122.584	1.11862	0.207186	5.39909	6.7e-08	2.24e-07
ynjD	343.623	-0.689491	0.127723	-5.39831	6.73e-08	2.25e-07
gatC	354.872	-0.678136	0.125859	-5.38805	7.12e-08	2.38e-07
ampG	713.891	0.495913	0.0920606	5.38681	7.17e-08	2.4e-07
agaR	264.008	0.76228	0.141578	5.38418	7.28e-08	2.43e-07
yafE	369.205	0.657202	0.122058	5.38434	7.27e-08	2.43e-07
pfkB	370.321	-0.663956	0.123391	-5.3809	7.41e-08	2.47e-07
yfbF	593.806	-0.543747	0.101062	-5.38032	7.44e-08	2.47e-07
dcrB	571.481	0.54804	0.101895	5.37846	7.51e-08	2.5e-07
gadC	748.344	-0.489576	0.0910736	-5.3756	7.63e-08	2.53e-07
yecF	253.277	-0.786414	0.146376	-5.37258	7.76e-08	2.58e-07
pal	96.4708	-1.29731	0.241605	-5.36955	7.89e-08	2.62e-07
yedL	383.377	-0.651987	0.121477	-5.36714	8e-08	2.65e-07
tolB	73.8456	-1.49873	0.279321	-5.36562	8.07e-08	2.67e-07
yedY	382.224	-0.652241	0.121626	-5.3627	8.2e-08	2.71e-07
ypaA	606.248	-0.536397	0.100082	-5.35958	8.34e-08	2.75e-07
ynaK	548.565	-0.560791	0.104746	-5.35381	8.61e-08	2.84e-07
lysU	851.853	0.463069	0.0866787	5.34236	9.17e-08	3.02e-07
sufI	405.419	-0.632978	0.118522	-5.34058	9.26e-08	3.05e-07
bglF	374.725	0.646607	0.121239	5.33335	9.64e-08	3.17e-07
ydiK	471.743	-0.594047	0.111395	-5.33278	9.67e-08	3.18e-07
rimJ	312.28	-0.71136	0.133405	-5.33235	9.7e-08	3.18e-07
lhr	258.744	-0.772719	0.14499	-5.32948	9.85e-08	3.23e-07
galT	602.256	-0.534659	0.100396	-5.32551	1.01e-07	3.3e-07
yjgF	305.063	0.707368	0.132986	5.31911	1.04e-07	3.41e-07
yddE	528.823	-0.565742	0.10638	-5.31812	1.05e-07	3.43e-07
yodC	366.51	-0.659014	0.12395	-5.31675	1.06e-07	3.45e-07
pspF	716.907	-0.492358	0.0926556	-5.31385	1.07e-07	3.5e-07
lepA	64.3628	1.5452	0.290797	5.31368	1.07e-07	3.5e-07
ugpC	509.51	0.568197	0.106936	5.31343	1.08e-07	3.51e-07
wzc	612.99	-0.528427	0.0995649	-5.30737	1.11e-07	3.62e-07
ydcD	423.998	-0.616662	0.11625	-5.3046	1.13e-07	3.67e-07
pps	324.876	-0.69363	0.130996	-5.29506	1.19e-07	3.87e-07
rluC	36.6392	-2.27076	0.428853	-5.29496	1.19e-07	3.87e-07
yhcC	496.365	0.571543	0.108027	5.29074	1.22e-07	3.95e-07
aspA	825.935	0.462364	0.0873966	5.29041	1.22e-07	3.96e-07
fabH	17.8198	6.02469	1.13903	5.28933	1.23e-07	3.98e-07
ycjQ	645.438	-0.513628	0.0971507	-5.28692	1.24e-07	4.02e-07
yibQ	808.798	0.464147	0.0879251	5.27889	1.3e-07	4.2e-07
motA	406.163	-0.624736	0.118351	-5.27866	1.3e-07	4.2e-07
yphH	177.614	-0.919212	0.174143	-5.27848	1.3e-07	4.2e-07
puuP	664.9	-0.505146	0.0958271	-5.27143	1.35e-07	4.36e-07
tyrP	381.378	-0.64163	0.121731	-5.2709	1.36e-07	4.37e-07
yjgM	686.028	0.493253	0.0936701	5.26585	1.4e-07	4.49e-07
malY	364.187	-0.653961	0.124293	-5.26143	1.43e-07	4.59e-07
ydbD	367.394	-0.651455	0.123823	-5.26119	1.43e-07	4.6e-07
ydiL	291.579	-0.723452	0.137527	-5.26045	1.44e-07	4.61e-07
yeiU	541.314	-0.553891	0.105299	-5.26015	1.44e-07	4.61e-07
yncM	678.218	-0.499155	0.0949398	-5.2576	1.46e-07	4.67e-07
ydiR	340.118	-0.673473	0.128248	-5.25132	1.51e-07	4.83e-07
ynaA	667.991	-0.502025	0.0956265	-5.24985	1.52e-07	4.87e-07
thiM	486.257	-0.577293	0.110027	-5.24684	1.55e-07	4.94e-07
ydcW	329.365	-0.68267	0.130148	-5.24533	1.56e-07	4.98e-07
fumA	284.737	-0.728833	0.139041	-5.24186	1.59e-07	5.07e-07
yeeU	577.741	-0.535815	0.102314	-5.23697	1.63e-07	5.2e-07
lysC	408.724	0.610693	0.116709	5.2326	1.67e-07	5.32e-07
gspE	287.081	0.713948	0.136522	5.22954	1.7e-07	5.4e-07
ydcI	697.032	-0.490212	0.0937826	-5.22711	1.72e-07	5.47e-07
narV	626.697	-0.514565	0.0985112	-5.22341	1.76e-07	5.58e-07
kefC	550.743	0.540687	0.103546	5.22171	1.77e-07	5.62e-07
cbrC	363.348	0.64123	0.122904	5.21733	1.82e-07	5.75e-07
yihU	317.436	0.681318	0.13062	5.21602	1.83e-07	5.79e-07
yhhW	415.275	0.604586	0.115917	5.21567	1.83e-07	5.79e-07
nth	346.64	-0.66292	0.127121	-5.21488	1.84e-07	5.81e-07
uspF	591.118	-0.527985	0.101243	-5.21504	1.84e-07	5.81e-07
yeeA	747.036	-0.474463	0.0910848	-5.20903	1.9e-07	5.99e-07
yjiP	333.548	0.664306	0.12776	5.19964	2e-07	6.29e-07
yeaL	394.938	-0.62249	0.119767	-5.19749	2.02e-07	6.36e-07
lysA	510.134	-0.560786	0.107917	-5.19644	2.03e-07	6.39e-07
pntB	376.045	-0.636125	0.122485	-5.19349	2.06e-07	6.49e-07
ynfE	409.964	-0.611494	0.117877	-5.18756	2.13e-07	6.69e-07
fixB	439.032	0.587832	0.113342	5.18637	2.14e-07	6.73e-07
nuoE	795.294	0.458212	0.0883786	5.18465	2.16e-07	6.78e-07
aegA	234.448	-0.78521	0.151479	-5.18361	2.18e-07	6.82e-07
manA	1144.53	-0.430923	0.0831707	-5.18119	2.2e-07	6.9e-07
yecJ	338.532	-0.665478	0.128473	-5.17993	2.22e-07	6.94e-07
katE	346.678	-0.657129	0.127082	-5.17091	2.33e-07	7.28e-07
wzb	626.011	-0.509396	0.0985572	-5.16853	2.36e-07	7.36e-07
fnr	464.723	-0.578696	0.112	-5.16695	2.38e-07	7.42e-07
ligT	624.423	0.505187	0.0978137	5.16479	2.41e-07	7.5e-07
nrfA	460.889	0.574281	0.111202	5.16428	2.41e-07	7.51e-07
guaC	620.618	0.505572	0.0980829	5.15453	2.54e-07	7.91e-07
mprA	508.615	-0.556711	0.108041	-5.15279	2.57e-07	7.97e-07
ydaF	500.723	-0.559805	0.108708	-5.14964	2.61e-07	8.1e-07
yfbW	549.365	-0.538378	0.104603	-5.14688	2.65e-07	8.21e-07
nfi	318.304	0.67038	0.130436	5.13954	2.75e-07	8.53e-07
baeS	477.962	-0.568972	0.110734	-5.13817	2.77e-07	8.59e-07
paaG	834.364	-0.449575	0.0877919	-5.12092	3.04e-07	9.4e-07
ydaV	507.458	-0.55329	0.108122	-5.11725	3.1e-07	9.58e-07
yedE	314.043	-0.679968	0.132938	-5.11494	3.14e-07	9.69e-07
phnL	607.811	0.50612	0.0990427	5.11012	3.22e-07	9.93e-07
menD	395.727	-0.611281	0.119632	-5.10969	3.23e-07	9.95e-07
ompN	654.377	-0.493064	0.0965028	-5.10933	3.23e-07	9.96e-07
aspC	89.8141	1.24196	0.243181	5.10716	3.27e-07	1.01e-06
yoaE	699.835	-0.477777	0.0935866	-5.10519	3.3e-07	1.02e-06
hemX	154.297	0.935956	0.183478	5.10119	3.38e-07	1.04e-06
tus	454.676	-0.575496	0.112924	-5.09633	3.46e-07	1.06e-06
idnD	463.443	0.565114	0.110952	5.09334	3.52e-07	1.08e-06
yejH	459.796	-0.572361	0.112438	-5.09047	3.57e-07	1.09e-06
gspD	175.36	0.874965	0.172046	5.08565	3.66e-07	1.12e-06
yhhN	502.492	0.546617	0.107508	5.08444	3.69e-07	1.13e-06
yzgL	315.423	0.665267	0.131014	5.07784	3.82e-07	1.17e-06
ydhV	567.921	-0.523401	0.103079	-5.07764	3.82e-07	1.17e-06
yohF	718.673	-0.469464	0.0925087	-5.0748	3.88e-07	1.18e-06
yhfS	370.229	0.617785	0.121864	5.06948	3.99e-07	1.22e-06
uup	81.1092	1.29938	0.256331	5.06914	4e-07	1.22e-06
dnaJ	87.9335	-1.28019	0.252557	-5.06891	4e-07	1.22e-06
ynjH	412.322	-0.594828	0.117533	-5.06095	4.17e-07	1.27e-06
yegP	724.95	-0.466468	0.0921834	-5.06021	4.19e-07	1.27e-06
dcd	297.255	0.680363	0.13447	5.05958	4.2e-07	1.28e-06
yiaB	744.269	0.4576	0.090508	5.0559	4.28e-07	1.3e-06
yegS	803.694	-0.448491	0.0887291	-5.05461	4.31e-07	1.31e-06
polB	476.448	0.554608	0.10976	5.05291	4.35e-07	1.32e-06
nfo	460.16	-0.567724	0.112424	-5.04987	4.42e-07	1.34e-06
hda	11.9087	-6.72533	1.33186	-5.04958	4.43e-07	1.34e-06
ydiO	301.67	-0.682687	0.135331	-5.04456	4.55e-07	1.37e-06
ydaS	662.972	-0.483565	0.095896	-5.0426	4.59e-07	1.39e-06
yedO	341.52	-0.644849	0.127907	-5.04155	4.62e-07	1.39e-06
ykfC	587.554	0.506685	0.100599	5.03666	4.74e-07	1.43e-06
rof	571.134	0.512832	0.101892	5.03307	4.83e-07	1.45e-06
phnF	654.367	0.481121	0.0956973	5.02753	4.97e-07	1.49e-06
treA	428.673	-0.581305	0.115644	-5.02668	4.99e-07	1.5e-06
yebC	1543.18	-0.415969	0.0828029	-5.02361	5.07e-07	1.52e-06
agaA	304.687	0.667183	0.132978	5.01726	5.24e-07	1.57e-06
wza	864.922	-0.435912	0.0869394	-5.01398	5.33e-07	1.6e-06
fkpA	337.826	0.636418	0.126957	5.01288	5.36e-07	1.6e-06
rfaB	264.86	0.708017	0.141249	5.01253	5.37e-07	1.61e-06
ynjB	417.369	-0.585263	0.11691	-5.00609	5.55e-07	1.66e-06
xylF	1041.16	0.417333	0.0833791	5.00525	5.58e-07	1.67e-06
yaaJ	539.292	0.52255	0.104454	5.0027	5.65e-07	1.69e-06
yeiP	446.946	-0.568481	0.113691	-5.00023	5.73e-07	1.71e-06
yciQ	307.903	-0.669798	0.134075	-4.99571	5.86e-07	1.75e-06
yhhK	17.5777	3.29891	0.660939	4.99124	6e-07	1.79e-06
yohN	706.495	-0.464691	0.0931632	-4.98793	6.1e-07	1.81e-06
bcsA	570.366	0.508491	0.101972	4.98659	6.15e-07	1.83e-06
yodD	314.747	-0.661646	0.132768	-4.98346	6.25e-07	1.85e-06
trpL	113.24	-1.09926	0.220596	-4.98312	6.26e-07	1.86e-06
ygjE	645.913	0.479397	0.0962864	4.97886	6.4e-07	1.9e-06
cycA	405.626	0.582256	0.117025	4.97549	6.51e-07	1.93e-06
phnH	779.88	0.442096	0.0889521	4.97005	6.69e-07	1.98e-06
yehL	435.901	-0.570226	0.114805	-4.96693	6.8e-07	2.01e-06
ddpA	661.41	-0.476571	0.0959954	-4.96452	6.89e-07	2.03e-06
yhaV	346.209	0.623499	0.125592	4.96448	6.89e-07	2.03e-06
pgpB	327.937	-0.646605	0.130257	-4.96406	6.9e-07	2.04e-06
ubiD	150.354	0.921713	0.185684	4.96389	6.91e-07	2.04e-06
spy	505.692	-0.536887	0.108215	-4.96131	7e-07	2.06e-06
feaR	557.716	-0.515355	0.103884	-4.96088	7.02e-07	2.06e-06
sodC	290.553	-0.682394	0.137583	-4.95986	7.05e-07	2.07e-06
yfdO	361.529	-0.617866	0.124573	-4.95987	7.05e-07	2.07e-06
dsdA	88.1542	-1.24953	0.251949	-4.95945	7.07e-07	2.07e-06
yfeK	629.753	-0.486827	0.0982031	-4.95734	7.15e-07	2.09e-06
ydgD	388.98	-0.597224	0.120503	-4.95609	7.19e-07	2.11e-06
mviM	528.263	-0.526873	0.106332	-4.95497	7.23e-07	2.12e-06
nhoA	467.44	-0.552629	0.111671	-4.94874	7.47e-07	2.18e-06
yecH	366.462	-0.612296	0.123801	-4.94582	7.58e-07	2.21e-06
yliB	319.305	-0.651848	0.131882	-4.94268	7.71e-07	2.25e-06
bioF	14.8623	5.75461	1.16448	4.94178	7.74e-07	2.26e-06
yheU	302.854	0.658827	0.133351	4.94056	7.79e-07	2.27e-06
metC	324.08	0.638946	0.129389	4.93817	7.89e-07	2.3e-06
ydhL	242.426	-0.735122	0.148947	-4.93545	8e-07	2.33e-06
yfbV	852.839	-0.43044	0.087231	-4.93448	8.04e-07	2.34e-06
amn	62.9389	-1.49219	0.302833	-4.92742	8.33e-07	2.42e-06
yicS	808.874	0.433138	0.0879263	4.92615	8.39e-07	2.43e-06
fliI	321.627	-0.647094	0.131366	-4.92588	8.4e-07	2.44e-06
flgL	350.703	-0.621939	0.126279	-4.9251	8.43e-07	2.44e-06
sucC	715.188	0.452081	0.0919787	4.91506	8.88e-07	2.57e-06
yciI	249.341	-0.722442	0.147046	-4.91304	8.97e-07	2.59e-06
yihI	232.281	0.735016	0.149731	4.90891	9.16e-07	2.65e-06
yfdE	772.858	-0.441045	0.0898738	-4.90738	9.23e-07	2.67e-06
fxsA	441.938	0.554585	0.113031	4.90648	9.27e-07	2.68e-06
ygcB	502.358	-0.532279	0.108513	-4.90521	9.33e-07	2.69e-06
yodA	230.03	-0.747799	0.152556	-4.90179	9.5e-07	2.74e-06
sieB	553.64	-0.510277	0.104178	-4.89814	9.67e-07	2.78e-06
yjgX	447.687	0.550277	0.112469	4.89269	9.95e-07	2.86e-06
dcuB	656.126	0.46717	0.0955638	4.88857	1.02e-06	2.92e-06
cvrA	653.825	-0.470727	0.0964716	-4.87943	1.06e-06	3.05e-06
ydeR	517.335	-0.523201	0.107228	-4.87931	1.06e-06	3.05e-06
yegQ	779.543	-0.437208	0.0896223	-4.87834	1.07e-06	3.07e-06
mtgA	248.151	0.708379	0.145218	4.87803	1.07e-06	3.07e-06
fliD	260.031	-0.703044	0.144293	-4.87234	1.1e-06	3.16e-06
yecP	1377.26	-0.40364	0.0828646	-4.87108	1.11e-06	3.17e-06
ydcY	589.579	-0.493004	0.101272	-4.86814	1.13e-06	3.22e-06
gcd	349.571	0.608535	0.12503	4.86711	1.13e-06	3.23e-06
thrB	440.595	0.550702	0.113183	4.86557	1.14e-06	3.26e-06
cmr	463.528	-0.544734	0.112002	-4.8636	1.15e-06	3.29e-06
yoaA	1448.3	-0.402348	0.0828337	-4.8573	1.19e-06	3.39e-06
nuoH	1210.72	0.40091	0.0825819	4.8547	1.21e-06	3.43e-06
ydhW	442.4	-0.553625	0.114099	-4.85214	1.22e-06	3.47e-06
yoaI	563.567	-0.501444	0.103381	-4.85044	1.23e-06	3.5e-06
yihO	411.148	0.564182	0.116368	4.84827	1.25e-06	3.54e-06
yedQ	354.358	-0.609077	0.125679	-4.84628	1.26e-06	3.57e-06
yedJ	400.341	-0.576217	0.11892	-4.84543	1.26e-06	3.58e-06
ybgE	533.285	-0.512869	0.10587	-4.84434	1.27e-06	3.6e-06
yieI	305.504	0.64344	0.132826	4.84423	1.27e-06	3.6e-06
yfbU	323.984	-0.633939	0.130891	-4.84325	1.28e-06	3.61e-06
yhbO	323.877	0.626528	0.129384	4.8424	1.28e-06	3.62e-06
glcE	670.664	0.457496	0.0946161	4.83528	1.33e-06	3.75e-06
moaC	370.264	0.588886	0.121788	4.83535	1.33e-06	3.75e-06
abgA	600.13	-0.485603	0.100436	-4.83496	1.33e-06	3.75e-06
ydcX	399.14	-0.575603	0.119088	-4.83344	1.34e-06	3.78e-06
yjiY	495.98	0.521797	0.108034	4.82992	1.37e-06	3.84e-06
yraP	272.268	0.674223	0.139601	4.82964	1.37e-06	3.85e-06
yfbN	674.335	-0.459005	0.0951004	-4.82653	1.39e-06	3.9e-06
ycfL	682.312	-0.456553	0.0946023	-4.82602	1.39e-06	3.91e-06
rnt	23.8657	-2.71851	0.563565	-4.82378	1.41e-06	3.95e-06
yedF	505.455	-0.521836	0.108223	-4.82184	1.42e-06	3.99e-06
mcrC	448.974	0.54133	0.112305	4.82019	1.43e-06	4.02e-06
yghD	538.407	0.503333	0.104533	4.81508	1.47e-06	4.12e-06
kbaY	366.165	0.588821	0.122425	4.80966	1.51e-06	4.23e-06
alx	697.149	0.447089	0.0929914	4.80785	1.53e-06	4.26e-06
feaB	787.814	-0.428731	0.0892699	-4.80264	1.57e-06	4.37e-06
yfbL	591.839	-0.484591	0.101086	-4.79385	1.64e-06	4.56e-06
ydaQ	618.224	-0.474579	0.099043	-4.79165	1.65e-06	4.61e-06
chbA	410.038	-0.56384	0.117685	-4.79108	1.66e-06	4.62e-06
gutM	190.789	-0.801459	0.167277	-4.7912	1.66e-06	4.62e-06
yfiQ	328.766	-0.622772	0.130023	-4.7897	1.67e-06	4.64e-06
manZ	1030.71	-0.401994	0.0839506	-4.78846	1.68e-06	4.67e-06
actP	566.141	0.489708	0.102278	4.788	1.68e-06	4.68e-06
nikD	215.377	0.742408	0.155111	4.7863	1.7e-06	4.71e-06
ynjA	448.456	-0.543105	0.113493	-4.78536	1.71e-06	4.73e-06
flk	350.855	-0.603368	0.12621	-4.78068	1.75e-06	4.84e-06
hofC	430.027	0.545849	0.114242	4.77802	1.77e-06	4.9e-06
yjbQ	468.656	0.527704	0.110441	4.77814	1.77e-06	4.9e-06
yecI	372.231	-0.586222	0.12282	-4.77302	1.81e-06	5.01e-06
uidB	249.306	-0.701112	0.146921	-4.77204	1.82e-06	5.03e-06
chbG	333.066	-0.616807	0.129274	-4.77131	1.83e-06	5.05e-06
bipA	105.735	1.06447	0.223151	4.77017	1.84e-06	5.07e-06
ansP	668.045	-0.455412	0.0955049	-4.76847	1.86e-06	5.11e-06
mazG	432.086	-0.549208	0.115172	-4.7686	1.86e-06	5.11e-06
ycbY	251.232	-0.696942	0.146369	-4.76156	1.92e-06	5.28e-06
ydcC	388.08	-0.573816	0.120552	-4.75989	1.94e-06	5.32e-06
lpxA	389.304	-0.572484	0.120326	-4.75777	1.96e-06	5.37e-06
ydcO	485.885	-0.522641	0.109912	-4.75508	1.98e-06	5.44e-06
yehB	629.962	-0.466711	0.0981561	-4.75479	1.99e-06	5.45e-06
yddJ	623.77	-0.468896	0.0986343	-4.75389	2e-06	5.47e-06
mrr	435.654	0.540095	0.113678	4.75108	2.02e-06	5.54e-06
chaA	446.943	-0.539566	0.113598	-4.7498	2.04e-06	5.57e-06
yegE	635.361	-0.464215	0.0977664	-4.7482	2.05e-06	5.61e-06
yeeR	495.865	-0.517596	0.109018	-4.74782	2.06e-06	5.62e-06
yhhT	479.5	0.51962	0.109468	4.74678	2.07e-06	5.64e-06
bdm	587.85	-0.481298	0.101406	-4.74624	2.07e-06	5.65e-06
xylE	430.054	0.542013	0.114229	4.74498	2.09e-06	5.68e-06
nuoG	1126.83	0.392669	0.082764	4.74445	2.09e-06	5.69e-06
yecG	272.559	-0.670302	0.141306	-4.74361	2.1e-06	5.71e-06
dgkA	142.269	0.904988	0.1908	4.74311	2.1e-06	5.72e-06
yfaD	477.027	-0.524914	0.110712	-4.74127	2.12e-06	5.77e-06
ynfB	489.069	-0.51915	0.109611	-4.7363	2.18e-06	5.91e-06
ydhO	258.439	-0.684839	0.144607	-4.73586	2.18e-06	5.92e-06
wcaL	623.853	-0.466859	0.0985972	-4.73501	2.19e-06	5.94e-06
trmC	257.083	-0.685945	0.144936	-4.73274	2.22e-06	6e-06
otsB	271.086	-0.67024	0.141647	-4.73177	2.23e-06	6.02e-06
narY	636.827	-0.461742	0.0976447	-4.7288	2.26e-06	6.1e-06
rhoL	375.541	0.572273	0.121021	4.7287	2.26e-06	6.1e-06
ydhU	485.718	-0.519164	0.109918	-4.72321	2.32e-06	6.27e-06
yhjH	312.643	0.620569	0.131463	4.72048	2.35e-06	6.35e-06
yfaX	589.446	-0.47764	0.101283	-4.71588	2.41e-06	6.49e-06
yeeF	594.761	-0.475369	0.100832	-4.71447	2.42e-06	6.53e-06
ycfJ	204.423	-0.759697	0.161438	-4.7058	2.53e-06	6.81e-06
cybB	351.558	-0.592291	0.126088	-4.69744	2.63e-06	7.08e-06
yjbE	345.924	0.589404	0.125587	4.69319	2.69e-06	7.23e-06
yeiC	533.812	-0.496153	0.105766	-4.69106	2.72e-06	7.3e-06
ycgK	591.66	-0.474079	0.101077	-4.6903	2.73e-06	7.32e-06
ydfI	491.508	-0.512863	0.109386	-4.68857	2.75e-06	7.38e-06
ydcF	481.187	-0.517	0.110325	-4.68614	2.78e-06	7.46e-06
yjhB	590.118	0.470281	0.100379	4.68505	2.8e-06	7.49e-06
dgoA	248.635	0.677982	0.14508	4.67317	2.97e-06	7.93e-06
dinD	1078.16	0.388022	0.0830493	4.67219	2.98e-06	7.96e-06
alsA	612.894	0.460678	0.0986333	4.67062	3e-06	8.02e-06
mdoD	404.611	-0.552549	0.118319	-4.67001	3.01e-06	8.04e-06
hipA	442.686	-0.532519	0.114036	-4.66973	3.02e-06	8.04e-06
yhhZ	443.491	0.526902	0.112849	4.6691	3.03e-06	8.06e-06
alkB	495.481	-0.508832	0.109004	-4.66802	3.04e-06	8.1e-06
nlpC	257.768	-0.675301	0.144688	-4.66729	3.05e-06	8.12e-06
yicG	736.23	0.424056	0.0908856	4.66582	3.07e-06	8.17e-06
ycjT	228.718	-0.712839	0.152847	-4.66373	3.11e-06	8.25e-06
yohL	469.846	-0.519014	0.111348	-4.66118	3.14e-06	8.35e-06
narW	729.62	-0.428134	0.0918571	-4.66087	3.15e-06	8.35e-06
ydeK	476.621	-0.516021	0.110724	-4.66042	3.16e-06	8.36e-06
yddH	497.97	-0.506538	0.108801	-4.65564	3.23e-06	8.55e-06
yeiM	675.067	-0.442247	0.0950218	-4.65417	3.25e-06	8.61e-06
ydiE	238.12	-0.697479	0.149949	-4.65143	3.3e-06	8.72e-06
thrA	562.16	0.477023	0.102584	4.65006	3.32e-06	8.77e-06
prpC	765.715	0.416255	0.0895269	4.6495	3.33e-06	8.79e-06
ynbA	332.666	-0.600636	0.129245	-4.64726	3.36e-06	8.88e-06
dcm	531.029	-0.492015	0.105992	-4.64199	3.45e-06	9.1e-06
dgt	323.543	0.600146	0.129402	4.63786	3.52e-06	9.28e-06
entC	620.055	0.453883	0.0981125	4.62614	3.73e-06	9.81e-06
ybaN	229.077	0.696133	0.150542	4.62417	3.76e-06	9.89e-06
fliF	391.32	-0.555128	0.120054	-4.62397	3.76e-06	9.9e-06
hlpA	378.274	0.557475	0.120625	4.62157	3.81e-06	1e-05
emrD	151.732	-0.868284	0.187993	-4.6187	3.86e-06	1.01e-05
fliR	341.035	-0.590303	0.127811	-4.61856	3.86e-06	1.01e-05
lipA	18.0908	2.86366	0.620486	4.61519	3.93e-06	1.03e-05
degP	211.479	0.720111	0.156364	4.60535	4.12e-06	1.08e-05
rluD	93.6503	-1.1186	0.242898	-4.60522	4.12e-06	1.08e-05
caiC	507.031	0.493022	0.107087	4.60394	4.15e-06	1.08e-05
pqqL	484.499	-0.505741	0.109984	-4.59831	4.26e-06	1.11e-05
mdtI	335.115	-0.592255	0.128819	-4.59757	4.27e-06	1.12e-05
mdtA	756.221	-0.416225	0.0905576	-4.59625	4.3e-06	1.12e-05
ychP	468.572	-0.511813	0.111439	-4.59275	4.37e-06	1.14e-05
pspD	791.948	-0.408022	0.0890787	-4.58047	4.64e-06	1.21e-05
mdoH	170.728	-0.810328	0.176997	-4.57821	4.69e-06	1.22e-05
yedD	273.461	-0.645501	0.141048	-4.57646	4.73e-06	1.23e-05
mppA	465.953	-0.510922	0.111712	-4.57355	4.8e-06	1.25e-05
helD	759.953	-0.413306	0.0903729	-4.57334	4.8e-06	1.25e-05
ycgJ	540.892	-0.480863	0.105155	-4.57291	4.81e-06	1.25e-05
yncD	527.136	-0.485392	0.106293	-4.56655	4.96e-06	1.29e-05
ydiY	251.507	-0.667359	0.146196	-4.56484	5e-06	1.3e-05
yfbJ	483.05	-0.501721	0.110072	-4.5581	5.16e-06	1.34e-05
ccmE	383.16	-0.550867	0.121131	-4.5477	5.42e-06	1.4e-05
ycjS	555.354	-0.472494	0.103973	-4.54438	5.51e-06	1.43e-05
yedI	434.09	-0.521772	0.114865	-4.54248	5.56e-06	1.44e-05
yehK	729.222	-0.417226	0.0918475	-4.54259	5.56e-06	1.44e-05
garL	320.913	0.589588	0.129867	4.53994	5.63e-06	1.45e-05
ydcZ	400.177	-0.53949	0.118848	-4.53932	5.64e-06	1.46e-05
chiA	235.98	0.673785	0.148462	4.53844	5.67e-06	1.46e-05
btuD	262.411	-0.651173	0.143489	-4.53812	5.68e-06	1.46e-05
ypdJ	566.035	-0.467605	0.103098	-4.53554	5.75e-06	1.48e-05
ydeV	709.837	-0.421214	0.0929173	-4.53321	5.81e-06	1.49e-05
yjhS	485.779	0.493555	0.10891	4.53175	5.85e-06	1.5e-05
tehB	461.903	-0.507308	0.112045	-4.52772	5.96e-06	1.53e-05
yrdB	213.161	0.704942	0.155756	4.52594	6.01e-06	1.54e-05
yhfY	393.466	0.536237	0.118543	4.52357	6.08e-06	1.56e-05
ynhG	430.429	-0.521357	0.115285	-4.52233	6.12e-06	1.57e-05
paaK	432.935	-0.519993	0.114997	-4.52181	6.13e-06	1.57e-05
ydgT	244.552	-0.668702	0.148006	-4.51807	6.24e-06	1.6e-05
ygeD	730.461	0.411864	0.0911633	4.51788	6.25e-06	1.6e-05
yneE	450.024	-0.511466	0.113226	-4.5172	6.27e-06	1.6e-05
frlR	218.47	0.694939	0.153888	4.51586	6.31e-06	1.61e-05
cusC	411.196	-0.529966	0.117467	-4.51163	6.43e-06	1.64e-05
cspA	410.042	0.52522	0.116464	4.50971	6.49e-06	1.65e-05
glvC	585.46	0.454171	0.100727	4.50893	6.52e-06	1.66e-05
ydeS	586.955	-0.457165	0.101421	-4.50761	6.56e-06	1.67e-05
ynjE	346.038	-0.571731	0.126893	-4.50561	6.62e-06	1.68e-05
yniA	331.453	-0.583055	0.129413	-4.50539	6.63e-06	1.68e-05
yhiP	883.493	0.386721	0.0858951	4.50225	6.72e-06	1.71e-05
ycfZ	415.576	-0.526384	0.11692	-4.50208	6.73e-06	1.71e-05
yegU	434.665	-0.516691	0.114804	-4.50063	6.78e-06	1.72e-05
abgT	770.462	-0.4046	0.0899104	-4.50004	6.79e-06	1.72e-05
ycjY	428.58	-0.519234	0.115445	-4.4977	6.87e-06	1.74e-05
tap	330.521	-0.582706	0.129574	-4.49709	6.89e-06	1.74e-05
nemA	207.772	-0.718943	0.15996	-4.49451	6.97e-06	1.76e-05
wcaE	791.344	-0.40034	0.0890966	-4.49332	7.01e-06	1.77e-05
yncA	544.962	-0.470815	0.104794	-4.49275	7.03e-06	1.78e-05
yeaG	427.924	-0.51763	0.115495	-4.48185	7.4e-06	1.87e-05
ybbD	1004.13	0.375383	0.0837872	4.4802	7.46e-06	1.88e-05
yfaW	525.737	-0.475264	0.106394	-4.46704	7.93e-06	2e-05
hisD	585.694	-0.453122	0.101497	-4.46438	8.03e-06	2.02e-05
hemY	114.833	0.952782	0.213524	4.46218	8.11e-06	2.04e-05
fepA	545.569	0.463281	0.10391	4.45849	8.25e-06	2.08e-05
yegV	322.541	-0.583968	0.131022	-4.45702	8.31e-06	2.09e-05
nikR	414.282	0.516771	0.115965	4.45629	8.34e-06	2.09e-05
ydcT	509.08	-0.4799	0.107787	-4.45229	8.5e-06	2.13e-05
yrhB	484.813	0.484958	0.108982	4.4499	8.59e-06	2.15e-05
hisI	459.67	-0.499223	0.112237	-4.44793	8.67e-06	2.17e-05
recQ	256.022	0.63614	0.143108	4.44516	8.78e-06	2.2e-05
ygdI	363.12	0.545909	0.122872	4.4429	8.88e-06	2.22e-05
yaeI	391.556	0.52738	0.118774	4.44021	8.99e-06	2.25e-05
ydhI	400.855	-0.526811	0.1187	-4.43817	9.07e-06	2.27e-05
hisF	560.813	-0.459375	0.103513	-4.43784	9.09e-06	2.27e-05
yhjC	441.542	0.501208	0.112997	4.43557	9.18e-06	2.29e-05
ydjH	164.612	-0.797177	0.180069	-4.42705	9.55e-06	2.38e-05
cmtB	147.975	-0.841496	0.190088	-4.42688	9.56e-06	2.38e-05
fliC	298.777	-0.599886	0.13554	-4.4259	9.6e-06	2.39e-05
yeeN	544.824	-0.463564	0.104808	-4.42297	9.74e-06	2.42e-05
lsrF	556.346	-0.459242	0.103861	-4.42171	9.79e-06	2.43e-05
ypdH	714.054	-0.40886	0.0926523	-4.41284	1.02e-05	2.53e-05
ksgA	41.1312	1.62767	0.368944	4.4117	1.03e-05	2.55e-05
flu	451.292	-0.498617	0.113045	-4.41079	1.03e-05	2.55e-05
yehD	577.123	-0.450626	0.102178	-4.41021	1.03e-05	2.56e-05
yjgL	587.675	0.442971	0.100554	4.40531	1.06e-05	2.62e-05
yceD	44.9133	-1.60281	0.364071	-4.40246	1.07e-05	2.65e-05
alkA	535.732	-0.464369	0.105544	-4.39975	1.08e-05	2.68e-05
ydhF	301.28	-0.593998	0.135033	-4.3989	1.09e-05	2.69e-05
narZ	567.244	-0.452233	0.102951	-4.3927	1.12e-05	2.77e-05
fliL	258.072	-0.634356	0.144427	-4.39224	1.12e-05	2.77e-05
puuR	532.231	-0.464422	0.105836	-4.3881	1.14e-05	2.82e-05
amiB	302.339	-0.591445	0.134803	-4.38746	1.15e-05	2.83e-05
yhfK	236.492	0.650077	0.148317	4.38302	1.17e-05	2.88e-05
hokB	450.969	-0.495476	0.113072	-4.38197	1.18e-05	2.9e-05
yedM	465.09	-0.489477	0.111707	-4.3818	1.18e-05	2.9e-05
yaeR	292.468	0.592684	0.135288	4.38092	1.18e-05	2.91e-05
gatD	714.693	-0.405667	0.0926091	-4.38042	1.18e-05	2.91e-05
yegZ	676.319	-0.41555	0.0948711	-4.38016	1.19e-05	2.91e-05
yjbH	569.905	0.4466	0.101959	4.3802	1.19e-05	2.91e-05
ygaP	488.081	0.475806	0.10869	4.37763	1.2e-05	2.94e-05
ydiS	318.499	-0.576286	0.131694	-4.37596	1.21e-05	2.96e-05
yfbM	431.892	-0.503401	0.115061	-4.37508	1.21e-05	2.97e-05
yohM	441.943	-0.498671	0.113989	-4.37474	1.22e-05	2.97e-05
yeeW	627.529	-0.429509	0.0982526	-4.37148	1.23e-05	3.02e-05
mglC	595.077	-0.439933	0.100738	-4.3671	1.26e-05	3.08e-05
yeiE	423.113	-0.505138	0.116008	-4.35433	1.33e-05	3.26e-05
kdsD	162.799	0.774932	0.178077	4.35167	1.35e-05	3.3e-05
agaW	347.18	0.545255	0.125342	4.35015	1.36e-05	3.32e-05
trkG	288.971	-0.597762	0.13757	-4.34515	1.39e-05	3.39e-05
pspB	578.536	-0.443462	0.102065	-4.34492	1.39e-05	3.39e-05
add	147.708	-0.8263	0.19021	-4.34415	1.4e-05	3.4e-05
wcaK	317.679	-0.572233	0.131878	-4.33911	1.43e-05	3.48e-05
fliG	384.219	-0.524349	0.120904	-4.33691	1.45e-05	3.51e-05
caiF	644.448	0.417746	0.0963314	4.33655	1.45e-05	3.51e-05
astD	326.291	-0.564759	0.130265	-4.33547	1.45e-05	3.53e-05
ygjV	641.338	0.41844	0.0965585	4.33354	1.47e-05	3.56e-05
rtn	589.319	-0.437342	0.101157	-4.32338	1.54e-05	3.72e-05
smpA	309.19	0.569889	0.131965	4.31847	1.57e-05	3.8e-05
yfhD	351.746	0.537676	0.124562	4.31654	1.58e-05	3.83e-05
wcaA	699.56	-0.403143	0.0934525	-4.31388	1.6e-05	3.88e-05
glnL	169.688	0.752303	0.174507	4.31101	1.63e-05	3.93e-05
soxR	727.343	0.393545	0.0913154	4.30973	1.63e-05	3.95e-05
prmB	108.086	0.948812	0.220237	4.30815	1.65e-05	3.97e-05
ygjR	794.254	0.380924	0.0884199	4.30813	1.65e-05	3.97e-05
nrfB	544.662	0.447923	0.103977	4.30792	1.65e-05	3.97e-05
aroL	657.416	0.411111	0.0954768	4.30587	1.66e-05	4e-05
ybgF	214.81	-0.676209	0.157199	-4.30162	1.7e-05	4.08e-05
yddG	592.952	-0.433652	0.100898	-4.29793	1.72e-05	4.15e-05
yadH	238.887	0.633828	0.147542	4.29592	1.74e-05	4.18e-05
ybdA	601.536	0.426046	0.0994873	4.28242	1.85e-05	4.44e-05
argG	319.33	0.556241	0.130124	4.27469	1.91e-05	4.59e-05
tolA	54.1435	-1.39145	0.325537	-4.27432	1.92e-05	4.6e-05
fixA	515.938	0.453939	0.106303	4.27023	1.95e-05	4.68e-05
cld	501.342	-0.462835	0.108423	-4.26879	1.97e-05	4.71e-05
gmr	408.387	-0.502016	0.117682	-4.26588	1.99e-05	4.76e-05
asnA	354.145	0.529622	0.124227	4.26335	2.01e-05	4.82e-05
tdcR	454.494	0.476379	0.11175	4.2629	2.02e-05	4.82e-05
fdnH	567.518	-0.438251	0.102916	-4.25834	2.06e-05	4.92e-05
mrcA	540.939	0.443647	0.104268	4.25488	2.09e-05	4.99e-05
ydgJ	120.931	-0.899445	0.211397	-4.25476	2.09e-05	4.99e-05
ynaI	638.544	-0.414567	0.0974436	-4.25443	2.1e-05	4.99e-05
sgcB	677.451	0.400498	0.0941654	4.25314	2.11e-05	5.02e-05
ydcV	421.935	-0.493719	0.116102	-4.25246	2.11e-05	5.03e-05
yaaU	394.249	0.502721	0.118401	4.24592	2.18e-05	5.18e-05
yiiL	113.194	0.912192	0.214857	4.24558	2.18e-05	5.18e-05
yfdC	657.831	-0.407619	0.0960772	-4.24262	2.21e-05	5.25e-05
ydgC	339.34	-0.542459	0.127924	-4.24048	2.23e-05	5.29e-05
ymjC	689.22	-0.398759	0.0940594	-4.23944	2.24e-05	5.32e-05
epd	33.7849	-1.81583	0.428612	-4.23653	2.27e-05	5.38e-05
bioA	13.4454	3.17547	0.750317	4.23217	2.31e-05	5.48e-05
ydiP	458.242	-0.475215	0.112325	-4.23073	2.33e-05	5.51e-05
ytjB	478.413	0.463038	0.109517	4.22801	2.36e-05	5.58e-05
speE	25.9831	2.02783	0.479817	4.22626	2.38e-05	5.62e-05
ninE	799.666	-0.374896	0.0887485	-4.22426	2.4e-05	5.66e-05
ybeX	120.98	0.874918	0.207519	4.21609	2.49e-05	5.86e-05
yfiF	429.69	0.481596	0.114225	4.2162	2.48e-05	5.86e-05
ydjM	408.194	-0.495704	0.117716	-4.211	2.54e-05	5.99e-05
ygjM	662.309	0.40039	0.0951415	4.20837	2.57e-05	6.06e-05
mcrA	489.998	-0.460072	0.109393	-4.20569	2.6e-05	6.13e-05
ubiG	491.532	-0.458606	0.109236	-4.19832	2.69e-05	6.33e-05
glcG	521.489	0.444385	0.10586	4.19784	2.69e-05	6.33e-05
pspC	410.102	-0.49314	0.117476	-4.19777	2.7e-05	6.33e-05
ydbC	244.171	-0.620409	0.147878	-4.19542	2.72e-05	6.4e-05
ydiA	337.265	-0.537947	0.128237	-4.19493	2.73e-05	6.41e-05
yahA	846.597	0.364068	0.0868069	4.194	2.74e-05	6.43e-05
gcl	783.241	0.372111	0.0888064	4.19014	2.79e-05	6.53e-05
yeiT	433.463	-0.480786	0.114804	-4.18787	2.82e-05	6.59e-05
fdnG	641.266	-0.407066	0.0972318	-4.18656	2.83e-05	6.63e-05
pspE	820.446	-0.368656	0.0880694	-4.18597	2.84e-05	6.64e-05
mglB	736.982	-0.38213	0.091395	-4.18108	2.9e-05	6.78e-05
hinT	350.567	-0.52677	0.126005	-4.18054	2.91e-05	6.79e-05
chbR	370.006	-0.513568	0.122947	-4.17713	2.95e-05	6.89e-05
ymfB	441.593	-0.47596	0.113954	-4.17679	2.96e-05	6.9e-05
malS	646.349	0.401649	0.0962247	4.17407	2.99e-05	6.97e-05
yjdL	564.605	0.427058	0.102378	4.17136	3.03e-05	7.05e-05
yohH	762.713	-0.375842	0.0901986	-4.16682	3.09e-05	7.19e-05
yqjC	670.861	0.393645	0.0945586	4.16298	3.14e-05	7.31e-05
uvrA	504.182	0.446269	0.107292	4.15938	3.19e-05	7.42e-05
dam	141.087	0.794861	0.191271	4.15568	3.24e-05	7.54e-05
yeiA	349.538	-0.524026	0.126139	-4.15436	3.26e-05	7.57e-05
fliZ	275.27	-0.582443	0.140397	-4.14856	3.35e-05	7.76e-05
yciN	604.963	0.411521	0.0992079	4.14807	3.35e-05	7.77e-05
ytfF	490.856	0.449362	0.108409	4.14507	3.4e-05	7.87e-05
sufB	517.13	0.440078	0.10622	4.14309	3.43e-05	7.94e-05
mdh	436.679	0.470045	0.113503	4.14125	3.45e-05	7.99e-05
ymfI	437.745	-0.473548	0.114363	-4.14075	3.46e-05	8.01e-05
yghR	637.884	0.40073	0.0967979	4.13986	3.48e-05	8.03e-05
mglA	533.417	-0.437112	0.105666	-4.13672	3.52e-05	8.14e-05
slyB	207.925	-0.659178	0.159573	-4.1309	3.61e-05	8.34e-05
fhuE	219.777	-0.641655	0.15536	-4.13012	3.63e-05	8.36e-05
yafQ	485.327	0.449751	0.108906	4.12971	3.63e-05	8.37e-05
ydgH	441.942	-0.470213	0.113898	-4.12835	3.65e-05	8.42e-05
kptA	386.501	0.492872	0.119422	4.12713	3.67e-05	8.46e-05
yjgN	751.125	0.372068	0.0901587	4.12681	3.68e-05	8.46e-05
yehQ	685.252	-0.388841	0.0942949	-4.12367	3.73e-05	8.57e-05
yjdF	336.746	0.523555	0.127042	4.12112	3.77e-05	8.66e-05
yfcG	500.824	-0.446716	0.108403	-4.12088	3.77e-05	8.67e-05
ycgE	740.034	-0.37592	0.0912496	-4.11968	3.79e-05	8.7e-05
ydjE	257.451	-0.594963	0.144421	-4.11965	3.79e-05	8.7e-05
yddL	541.457	-0.432533	0.104999	-4.1194	3.8e-05	8.71e-05
hlyE	494.762	-0.448799	0.108953	-4.11922	3.8e-05	8.71e-05
dinJ	488.472	0.447159	0.108659	4.11524	3.87e-05	8.85e-05
ptr	648.577	-0.397695	0.0967097	-4.11226	3.92e-05	8.96e-05
yjfC	585.723	0.414137	0.100705	4.1124	3.92e-05	8.96e-05
deoD	936.356	0.348654	0.0847966	4.11165	3.93e-05	8.97e-05
yddB	589.342	-0.415782	0.101134	-4.11122	3.94e-05	8.98e-05
atoC	377.371	-0.500337	0.121783	-4.10841	3.98e-05	9.09e-05
malX	268.148	-0.582402	0.141913	-4.10393	4.06e-05	9.26e-05
ypeA	621.477	-0.404711	0.0986579	-4.10217	4.09e-05	9.33e-05
ydiT	333.368	-0.528339	0.128868	-4.09985	4.13e-05	9.41e-05
yegJ	653.197	-0.394971	0.096371	-4.09844	4.16e-05	9.46e-05
glcB	447.755	0.460391	0.112379	4.09677	4.19e-05	9.53e-05
yjeT	578.112	0.414697	0.101312	4.09328	4.25e-05	9.67e-05
yagB	297.111	0.549639	0.134356	4.0909	4.3e-05	9.76e-05
yrhA	500.915	0.43988	0.107579	4.08889	4.33e-05	9.84e-05
ydfJ	470.939	-0.453975	0.111098	-4.08628	4.38e-05	9.94e-05
pgi	30.4363	-1.86074	0.455822	-4.08217	4.46e-05	0.00010113
basS	285.928	0.557324	0.136565	4.08103	4.48e-05	0.00010156
ddpF	582.074	-0.415044	0.101719	-4.08028	4.5e-05	0.000101756
yjcZ	437.951	0.462659	0.113387	4.08036	4.5e-05	0.000101756
pepB	244.794	0.595397	0.145945	4.07961	4.51e-05	0.000101986
yohD	770.975	-0.366161	0.0898237	-4.07644	4.57e-05	0.000103319
yfaP	445.51	-0.462438	0.113529	-4.0733	4.64e-05	0.000104656
potD	573.566	-0.416748	0.102377	-4.0707	4.69e-05	0.000105706
yjhI	696.737	0.378513	0.0929853	4.07067	4.69e-05	0.000105706
ynjI	345.874	-0.515112	0.126697	-4.06568	4.79e-05	0.000107925
hisM	331.43	-0.525119	0.12919	-4.06471	4.81e-05	0.000108309
yacH	322.549	0.526232	0.129497	4.06367	4.83e-05	0.000108722
yifK	225.705	0.615332	0.151434	4.06336	4.84e-05	0.000108796
yhaH	489.214	0.441068	0.108569	4.06257	4.85e-05	0.000109095
ddpC	417.41	-0.473033	0.116569	-4.05796	4.95e-05	0.0001112
yceH	385.201	-0.489516	0.120667	-4.05677	4.98e-05	0.000111698
minC	161.35	-0.736368	0.181523	-4.0566	4.98e-05	0.000111707
atoS	383.075	-0.490654	0.120994	-4.05521	5.01e-05	0.000112302
mdtD	543.87	-0.423556	0.104792	-4.04187	5.3e-05	0.000118812
bioD	9.23414	5.07748	1.25642	4.04123	5.32e-05	0.000119059
entF	187.468	0.669946	0.165845	4.03959	5.35e-05	0.000119821
yiiX	320.19	-0.529791	0.131238	-4.03687	5.42e-05	0.000121141
yfaQ	443.336	-0.459186	0.113755	-4.03662	5.42e-05	0.000121192
yoeA	522.134	-0.43018	0.106589	-4.03586	5.44e-05	0.000121507
yfbS	349.939	-0.508638	0.126036	-4.03565	5.45e-05	0.000121538
caiD	456.04	0.449321	0.11157	4.02725	5.64e-05	0.000125886
ycjP	920.977	-0.34427	0.0855274	-4.02526	5.69e-05	0.000126875
yraR	336.594	0.511169	0.127056	4.02318	5.74e-05	0.000127917
stfE	369.562	-0.493074	0.122903	-4.0119	6.02e-05	0.0001341
ycgR	388.035	-0.482405	0.120272	-4.01094	6.05e-05	0.000134565
gdhA	318.027	-0.527632	0.131645	-4.008	6.12e-05	0.000136162
adhP	618.991	-0.395893	0.0988205	-4.00618	6.17e-05	0.00013713
yeiR	632.068	-0.391992	0.0978606	-4.00562	6.19e-05	0.00013737
rcsD	533.232	-0.42316	0.105648	-4.00539	6.19e-05	0.000137415
yeeY	408.713	-0.470525	0.117581	-4.0017	6.29e-05	0.000139487
ydeM	694.262	-0.374884	0.0937194	-4.00007	6.33e-05	0.000140364
rluB	102.344	-0.921474	0.230453	-3.99853	6.37e-05	0.00014119
inaA	468.198	-0.444997	0.111297	-3.99829	6.38e-05	0.000141244
ydjF	340.442	-0.509979	0.1276	-3.99669	6.42e-05	0.000142114
rcsA	382.878	-0.483462	0.121005	-3.9954	6.46e-05	0.000142803
narU	343.333	-0.507729	0.127122	-3.99404	6.5e-05	0.000143534
cmk	9.01415	4.99582	1.2517	3.99122	6.57e-05	0.000145163
rtcB	371.081	0.485334	0.121614	3.99078	6.59e-05	0.000145341
yeiH	457.281	-0.448233	0.112342	-3.98991	6.61e-05	0.00014578
yegL	667.043	-0.380599	0.0954163	-3.98883	6.64e-05	0.000146355
garR	365.771	0.488033	0.122375	3.988	6.66e-05	0.000146775
yihS	249.053	0.576441	0.144801	3.98092	6.86e-05	0.000151121
yeaJ	435.412	-0.455745	0.114549	-3.9786	6.93e-05	0.000152512
ttdB	670.738	0.37593	0.0945826	3.97462	7.05e-05	0.000154987
rffD	275.987	0.550721	0.138608	3.97324	7.09e-05	0.000155723
yeeT	457.476	-0.446256	0.112317	-3.97319	7.09e-05	0.000155723
rseC	195.319	0.645301	0.162453	3.97224	7.12e-05	0.00015625
ydiD	264.078	-0.567018	0.142784	-3.97117	7.15e-05	0.000156857
ydaM	726.591	-0.364636	0.0918977	-3.96785	7.25e-05	0.000158958
yncH	384.715	-0.4789	0.120737	-3.96647	7.29e-05	0.000159779
wbbK	554.261	-0.411882	0.103927	-3.9632	7.4e-05	0.000161887
potB	672.119	-0.376866	0.0950979	-3.96292	7.4e-05	0.000161971
ymfD	475.226	-0.437783	0.110631	-3.95715	7.58e-05	0.000165833
pntA	239.151	-0.590137	0.149151	-3.95663	7.6e-05	0.000166089
pabA	15.4469	-2.85318	0.721347	-3.95535	7.64e-05	0.000166879
uxaA	833.965	0.344447	0.0871536	3.95218	7.74e-05	0.000168997
recA	109.764	0.861769	0.218072	3.95176	7.76e-05	0.000169192
maoC	671.773	-0.375873	0.0951333	-3.95101	7.78e-05	0.000169616
glpC	543.903	-0.413901	0.104778	-3.95025	7.81e-05	0.000170051
yadR	11.0186	3.37692	0.855025	3.9495	7.83e-05	0.000170484
dgoK	267.247	0.55507	0.140556	3.94911	7.84e-05	0.000170654
yoeB	484.076	-0.433662	0.109843	-3.948	7.88e-05	0.000171342
fliY	271.88	-0.556269	0.140972	-3.94595	7.95e-05	0.000172707
yjiD	546.465	0.40959	0.10381	3.94556	7.96e-05	0.000172883
ydhS	472.49	-0.437388	0.110875	-3.94487	7.98e-05	0.000173276
yciW	661.604	-0.377745	0.0957807	-3.94385	8.02e-05	0.000173906
yncI	538.594	-0.41483	0.105194	-3.94348	8.03e-05	0.000174068
chbF	313.702	-0.521801	0.132393	-3.94131	8.1e-05	0.000175543
fimA	552.534	0.407042	0.103337	3.93898	8.18e-05	0.000177144
araF	236.168	-0.590588	0.15001	-3.937	8.25e-05	0.000178502
gabT	796.465	-0.349471	0.0888166	-3.93474	8.33e-05	0.000179966
ydcK	448.229	-0.445542	0.11323	-3.93483	8.33e-05	0.000179966
garK	332.216	0.501656	0.127804	3.92519	8.67e-05	0.000187144
ynbC	699.147	-0.366601	0.0934072	-3.92476	8.68e-05	0.000187366
yncN	426.09	-0.453356	0.115535	-3.92397	8.71e-05	0.000187868
ytfK	290.921	-0.536978	0.136974	-3.9203	8.84e-05	0.00019063
yfeS	646.691	-0.379446	0.0967946	-3.92011	8.85e-05	0.000190668
yfcV	490.509	-0.428055	0.109259	-3.91779	8.94e-05	0.000192391
ydaT	779.681	-0.350392	0.0894559	-3.91692	8.97e-05	0.000192968
ydbJ	344.757	-0.496774	0.126839	-3.91659	8.98e-05	0.000193061
yneL	508.36	-0.421974	0.107742	-3.91651	8.98e-05	0.000193061
sgcR	498.228	0.421747	0.107795	3.91251	9.13e-05	0.000196174
yedV	536.812	-0.411935	0.105337	-3.91065	9.2e-05	0.000197568
yehS	606.446	-0.389869	0.0997368	-3.90898	9.27e-05	0.000198819
fecE	637.276	0.378435	0.0968406	3.90781	9.31e-05	0.000199657
yraK	388.758	0.465524	0.119136	3.90749	9.33e-05	0.000199803
yeeJ	409.259	-0.458851	0.11747	-3.90613	9.38e-05	0.000200811
evgA	589.881	-0.394251	0.101053	-3.90142	9.56e-05	0.00020463
ykfA	436.753	0.442404	0.113482	3.89844	9.68e-05	0.000207039
yfaA	429.002	-0.449058	0.115222	-3.89732	9.73e-05	0.000207876
cysD	42.518	-1.44515	0.370945	-3.89586	9.79e-05	0.000209006
oppD	410.416	-0.456914	0.117321	-3.89457	9.84e-05	0.000209878
ymfA	518.904	-0.416021	0.106821	-3.89455	9.84e-05	0.000209878
nrdF	402.902	-0.459976	0.118265	-3.88938	0.000100501	0.000214272
cysI	27.7605	-1.85827	0.47784	-3.8889	0.000100701	0.000214568
abgB	373.985	-0.475177	0.122206	-3.88833	0.000100938	0.000214944
ydeO	632.11	-0.380116	0.0978391	-3.88512	0.000102281	0.000217673
yeeP	407.282	-0.456445	0.117729	-3.87708	0.000105717	0.000224849
sufC	413.429	0.449723	0.116015	3.87643	0.000105999	0.000225311
yjiL	367.615	0.47317	0.122122	3.87456	0.000106816	0.000226912
tsgA	392.894	0.459232	0.118538	3.87415	0.000106999	0.000227164
ydaL	471.545	-0.429613	0.11097	-3.87144	0.000108195	0.000229564
napA	397.795	-0.460344	0.118919	-3.87107	0.00010836	0.000229776
fimI	474.121	0.425316	0.109904	3.86988	0.000108887	0.000230754
yqjE	312.462	0.508125	0.131366	3.868	0.000109731	0.000232402
yjdI	459.581	0.429918	0.111247	3.86453	0.000111305	0.000235594
yhgE	240.465	0.567753	0.147037	3.86128	0.000112792	0.000238599
usg	489.018	-0.42228	0.109371	-3.86098	0.000112931	0.000238749
yedA	239.138	-0.575214	0.149106	-3.85776	0.000114431	0.000241774
yjeP	516.061	0.409786	0.106292	3.85527	0.000115603	0.000244105
rfaZ	334.79	0.490463	0.127335	3.85175	0.000117275	0.000247487
gpp	589.432	0.386315	0.100402	3.84768	0.000119241	0.000251485
ydjY	462.058	-0.430147	0.111839	-3.84613	0.000119998	0.000252931
yehU	520.726	-0.410174	0.106658	-3.84569	0.000120215	0.000253236
frlA	341.411	0.485311	0.126222	3.84491	0.000120598	0.000253889
yagM	229.323	-0.583993	0.152019	-3.84159	0.000122241	0.000257041
ykfH	603.148	0.381712	0.0993594	3.84173	0.00012217	0.000257041
ycgV	563.061	-0.395876	0.103181	-3.83671	0.000124692	0.00026204
ecpD	440.833	0.433143	0.113034	3.83198	0.000127114	0.00026697
yjfL	715.261	0.352216	0.0919386	3.83099	0.000127629	0.000267892
oppB	455.075	-0.430803	0.112515	-3.82885	0.000128744	0.000270071
yfbO	620.218	-0.377793	0.0986785	-3.82852	0.000128914	0.000270267
yfbE	383.681	-0.462384	0.120816	-3.82718	0.000129619	0.000271583
yadE	167.626	-0.679065	0.177719	-3.821	0.000132911	0.000278314
yraJ	340.633	0.48246	0.126347	3.81853	0.000134249	0.000280948
cirA	506.751	-0.411423	0.107827	-3.8156	0.000135851	0.000284133
ygiC	492.088	0.41322	0.108319	3.81485	0.000136267	0.000284834
paaY	280.561	-0.530373	0.139044	-3.81442	0.000136505	0.000285161
yehR	232.503	-0.575925	0.151057	-3.81263	0.000137493	0.000287056
nadA	6.87274	5.52761	1.45221	3.80633	0.000141045	0.000294297
sodB	261.856	-0.544605	0.143193	-3.80328	0.000142791	0.000297763
ycjR	872.998	-0.329134	0.0865771	-3.80163	0.000143748	0.000299581
tehA	461.555	-0.424924	0.111901	-3.79732	0.000146272	0.000304661
dbpA	456.781	-0.426299	0.112334	-3.79494	0.000147682	0.000307309
yjhV	627.817	0.370039	0.0975102	3.79487	0.000147718	0.000307309
yqhC	581.449	0.383119	0.101032	3.79204	0.000149416	0.000310658
ypdG	479.907	-0.417535	0.110173	-3.78981	0.000150765	0.000313278
atoD	438.626	-0.432474	0.114142	-3.7889	0.000151317	0.000314239
exuT	790.641	0.335317	0.0885306	3.78759	0.000152119	0.000315718
araH	414.193	-0.44247	0.116868	-3.78607	0.000153048	0.000317461
xthA	302.993	-0.508817	0.134407	-3.78563	0.00015332	0.000317836
glpA	290.64	-0.517883	0.13691	-3.78264	0.000155175	0.000321493
nlpI	16.8696	-2.48319	0.657283	-3.77796	0.00015812	0.000327402
yegT	752.99	-0.342027	0.0905669	-3.77651	0.000159043	0.000329119
hybG	331.702	0.481127	0.127851	3.76318	0.000167764	0.000346963
yadD	372.948	0.456332	0.121309	3.76172	0.000168749	0.000348794
yhcB	99.4107	-0.876509	0.233117	-3.75995	0.000169949	0.000351068
ampE	302.784	0.500267	0.133185	3.75618	0.000172529	0.000356188
rihC	419.773	0.432793	0.115292	3.75389	0.000174114	0.000359216
yehW	463.576	-0.419095	0.111647	-3.75376	0.000174199	0.000359216
yedZ	428.852	-0.432128	0.115186	-3.75155	0.000175745	0.000362191
yggS	71.5768	1.01478	0.270622	3.74979	0.000176981	0.000364525
zraS	329.148	0.480985	0.128336	3.74784	0.000178362	0.000367154
ogt	505.693	-0.403858	0.107918	-3.74228	0.000182357	0.000375158
yeeE	340.545	-0.476763	0.127514	-3.73892	0.000184813	0.00037999
idnT	528.805	0.392879	0.105242	3.7331	0.000189137	0.000388653
ydhC	396.932	-0.443975	0.118971	-3.7318	0.000190119	0.000390443
puuE	557.216	-0.386311	0.103644	-3.72728	0.000193561	0.000397279
plsX	134.441	-0.740661	0.198791	-3.72582	0.000194681	0.000399346
yghT	709.885	0.343563	0.0922253	3.72526	0.000195113	0.000399999
livK	329.36	0.477779	0.128278	3.72456	0.000195658	0.000400883
yiaM	673.058	0.350615	0.0944361	3.71272	0.00020504	0.000419862
napB	499.451	-0.402291	0.108432	-3.71009	0.000207188	0.000424012
cspE	189.79	-0.618137	0.166686	-3.70839	0.000208578	0.000426608
ycdX	386.692	-0.446069	0.120342	-3.70669	0.000209985	0.000429238
ydeH	482.247	-0.407328	0.109947	-3.70476	0.000211595	0.000432277
idnK	432.652	0.421593	0.113909	3.70114	0.000214633	0.00043823
ycjO	710.938	-0.342678	0.0927027	-3.69653	0.000218566	0.000446001
ydcE	433.209	-0.423229	0.114696	-3.69002	0.00022424	0.000457315
yhbU	244.243	0.538409	0.145958	3.6888	0.000225318	0.000459248
metH	180.755	0.622119	0.168784	3.68589	0.000227901	0.000464242
ymfQ	368.662	-0.452909	0.122945	-3.68382	0.000229762	0.000467763
allD	1059.45	0.30648	0.0832011	3.68361	0.000229953	0.000467882
yhfG	342.135	0.464042	0.126117	3.67947	0.000233723	0.000475277
yfaO	401.922	-0.435222	0.118317	-3.67844	0.000234665	0.000476917
ydeN	625.684	-0.360533	0.0982634	-3.66904	0.000243461	0.000494508
yfaT	395.082	-0.436816	0.119174	-3.66536	0.000246987	0.000501381
yqiK	399.294	-0.434812	0.118648	-3.66471	0.000247618	0.000502372
yejE	537.896	-0.385074	0.105196	-3.66053	0.000251691	0.00051034
osmB	566.605	-0.375685	0.102841	-3.65306	0.000259136	0.000525135
ccmB	492.679	-0.397378	0.109009	-3.64537	0.000267005	0.00054077
lar	298.329	0.487842	0.134013	3.64027	0.000272357	0.000551293
exuR	527.898	0.383158	0.105306	3.63852	0.000274208	0.00055472
ymfH	427.656	-0.419351	0.115295	-3.6372	0.000275623	0.000557262
rtcR	274.182	0.504171	0.138954	3.62834	0.000285251	0.000576398
yeiL	577.015	-0.369607	0.102019	-3.62291	0.000291303	0.000588289
tar	288.857	-0.496367	0.137193	-3.61803	0.000296859	0.000599164
azoR	661.828	-0.346161	0.0957228	-3.61629	0.000298854	0.000602845
ycjW	775.086	-0.323478	0.0896041	-3.61007	0.000306109	0.000617126
mntR	603.283	-0.360257	0.0999281	-3.60516	0.000311957	0.000628557
glcF	431.161	0.411195	0.114067	3.60487	0.000312314	0.000628916
ymgH	518.76	-0.384808	0.106752	-3.60468	0.000312532	0.000628995
ccmG	245.879	-0.529773	0.14702	-3.6034	0.000314076	0.000631741
rsmB	304.318	0.478615	0.132844	3.60282	0.000314784	0.000632805
livJ	308.494	0.47544	0.132063	3.60011	0.000318081	0.000639066
mdaB	591.486	0.360778	0.100243	3.59904	0.000319395	0.000641342
yncJ	421.629	-0.41704	0.115897	-3.59837	0.000320218	0.000642628
potC	552.156	-0.373779	0.10401	-3.59367	0.000326054	0.000653677
yecR	257.981	-0.517401	0.143977	-3.59364	0.000326096	0.000653677
panE	8.59186	3.58017	0.996408	3.59307	0.0003268	0.000654716
yibK	843.311	0.312136	0.0868896	3.59233	0.000327739	0.000656224
murP	447.167	-0.406559	0.113203	-3.59141	0.000328897	0.000658168
yhaO	327.977	0.460686	0.128506	3.58494	0.000337155	0.000674311
ycfQ	237.629	-0.535238	0.149327	-3.58433	0.000337947	0.000675511
ylaC	750.242	0.323226	0.090193	3.58371	0.00033875	0.000676731
gcvP	54.091	-1.15257	0.321654	-3.58325	0.000339341	0.000677528
atoE	414.013	-0.418445	0.116796	-3.58269	0.000340068	0.000678594
garD	437.646	0.406053	0.113361	3.58195	0.000341043	0.000680154
osmC	459.318	-0.401261	0.112045	-3.58125	0.00034196	0.000681597
ccmD	361.626	-0.443901	0.123968	-3.58077	0.000342583	0.000682453
icdC	480.292	-0.394069	0.110071	-3.58014	0.000343405	0.000683703
sufS	445.849	0.402377	0.112543	3.57532	0.000349798	0.000696037
yjdJ	500.206	0.384627	0.107604	3.57448	0.000350931	0.000697896
sra	793.667	-0.317267	0.0888636	-3.57027	0.000356617	0.000708805
fixX	431.559	0.406963	0.114002	3.5698	0.000357256	0.000709673
yohC	552.099	-0.371206	0.104009	-3.56899	0.000358366	0.000711477
glcD	593.92	0.356951	0.100071	3.56696	0.000361144	0.000716588
ais	589.504	-0.359929	0.100999	-3.56368	0.000365689	0.000725198
yjaA	108.614	0.779243	0.218909	3.55967	0.000371322	0.000735953
mepA	491.34	-0.388271	0.109105	-3.55868	0.000372722	0.000738313
fliO	336.578	-0.455573	0.12811	-3.55611	0.000376385	0.000745149
cybC	457.581	0.395896	0.111406	3.55363	0.000379954	0.000751792
hybC	598.465	0.353702	0.0997053	3.54747	0.000388947	0.000769154
yhiQ	402.156	0.415918	0.117364	3.54384	0.00039434	0.00077938
clpS	239.345	-0.52704	0.148758	-3.54293	0.000395712	0.000781654
yjjX	326.357	0.455784	0.128774	3.53943	0.000400997	0.000791648
yhbT	277.679	0.489158	0.138225	3.53884	0.000401883	0.000792952
aer	767.928	0.316378	0.0894137	3.53836	0.000402614	0.00079395
fliT	355.673	-0.441626	0.124908	-3.53561	0.000406835	0.000801824
ompF	131.356	0.700182	0.198058	3.53523	0.000407414	0.000802517
ygcM	411.892	-0.413801	0.117058	-3.535	0.000407774	0.000802778
yedW	471.203	-0.391887	0.110878	-3.5344	0.000408696	0.000804142
ygaD	532.314	0.370792	0.104962	3.53262	0.000411469	0.000809146
ydcH	404.723	-0.416564	0.117944	-3.53188	0.000412621	0.000810957
moaD	310.679	0.464865	0.131631	3.53158	0.000413086	0.000811419
hybF	473.714	-0.390421	0.110671	-3.52775	0.000419104	0.00082278
yjcR	478.585	0.38611	0.109486	3.52656	0.000420994	0.000826031
ykfB	581.01	0.356374	0.101065	3.52618	0.000421605	0.000826768
ptsG	125.882	0.713998	0.202515	3.52566	0.000422431	0.000827927
fecD	743.879	0.318712	0.0904832	3.52234	0.000427763	0.000837911
deoB	929.837	0.298965	0.0849135	3.52082	0.000430215	0.000842246
agaI	182.872	0.590457	0.167762	3.51961	0.000432186	0.000845633
copA	614.756	0.346412	0.0984462	3.5188	0.000433511	0.000847754
yoeF	368.179	-0.43241	0.12297	-3.51639	0.000437456	0.000854994
yeiB	794.221	-0.312353	0.0888511	-3.51547	0.000438982	0.000857501
yejL	527.871	-0.372472	0.105969	-3.51493	0.000439862	0.000858743
gntU	350.622	0.437542	0.124671	3.50957	0.000448829	0.000875764
yjjP	399.009	0.413018	0.117758	3.50735	0.0004526	0.000882633
nudB	4.84861	-5.42132	1.54636	-3.50585	0.000455153	0.00088712
yajC	551.733	-0.364201	0.104016	-3.50139	0.000462832	0.000901588
yobG	1215.81	0.289067	0.0825726	3.50076	0.000463934	0.000903234
yfeN	454.578	-0.393444	0.112482	-3.49785	0.000469023	0.000912133
yjiQ	529.258	0.367939	0.105189	3.49789	0.000468949	0.000912133
yjeS	531.182	-0.369207	0.105708	-3.49272	0.000478135	0.000929339
uvrB	230.347	-0.528595	0.151468	-3.4898	0.000483377	0.000939011
ppiA	127.621	0.701612	0.201183	3.48744	0.000487675	0.000946837
ygcL	352.379	-0.4374	0.125427	-3.48728	0.000487957	0.000946862
pepT	391.003	-0.417028	0.119676	-3.48463	0.000492819	0.000955771
fimC	520.542	0.368593	0.105918	3.47998	0.000501445	0.000971963
ddpX	279.054	-0.484443	0.139223	-3.47962	0.000502117	0.000972356
gmd	387.558	-0.418097	0.120157	-3.47958	0.0005022	0.000972356
ydjX	383.035	-0.41999	0.120799	-3.47678	0.000507472	0.000982023
ansB	584.712	0.349858	0.10076	3.4722	0.00051621	0.000998385
ymfJ	258.023	-0.49952	0.143881	-3.47177	0.000517036	0.000999432
hybD	532.325	0.364146	0.104945	3.46988	0.000520684	0.00100593
dacA	108.683	-0.770286	0.222202	-3.4666	0.000527088	0.00101775
yeaI	392.451	-0.413793	0.119489	-3.46301	0.000534169	0.00103085
hcaF	343.705	0.435063	0.125813	3.45802	0.000544161	0.00104956
yhjK	331.422	0.441489	0.127879	3.45241	0.000555606	0.00107105
yagF	87.0675	0.843577	0.244619	3.44853	0.000563651	0.00108596
csgF	344.761	-0.43667	0.126651	-3.44782	0.000565141	0.00108824
mdtJ	363.766	-0.426151	0.123613	-3.44747	0.000565861	0.00108903
yobD	864.974	-0.298893	0.0867287	-3.4463	0.000568321	0.00109316
moaA	299.116	0.46113	0.133847	3.4452	0.000570641	0.00109703
yjhD	723.218	0.315204	0.0915144	3.4443	0.000572531	0.00110006
yegH	543.032	-0.36072	0.104753	-3.44353	0.000574164	0.0011026
ycjN	767.985	-0.309317	0.0898585	-3.44227	0.000576863	0.00110717
fumB	475.469	0.377404	0.109744	3.43895	0.000583975	0.00112021
pmbA	603.814	0.341189	0.0992905	3.43627	0.000589784	0.00113074
dkgB	257.987	0.489609	0.142498	3.43589	0.000590612	0.00113171
hcaR	370.429	0.418077	0.121685	3.43574	0.000590938	0.00113172
yfcL	473.905	0.377364	0.109909	3.43344	0.00059598	0.00114076
atoB	520.605	-0.365615	0.106556	-3.43121	0.000600888	0.00114952
trmU	17.3378	-2.14859	0.6267	-3.42842	0.000607096	0.00116077
yjiR	473.199	0.376833	0.109973	3.4266	0.000611191	0.00116796
ychM	565.417	-0.352496	0.102911	-3.42524	0.000614251	0.00117318
yeiI	461.051	-0.382906	0.111824	-3.4242	0.000616623	0.00117707
htrG	425.759	0.392496	0.114635	3.42388	0.000617344	0.00117781
gntR	269.897	0.478787	0.13987	3.42308	0.000619166	0.00118064
yfaU	288.7	-0.469427	0.137159	-3.42252	0.00062044	0.00118243
selD	457.992	0.381068	0.11138	3.42133	0.000623158	0.00118697
yefM	619.397	-0.337527	0.0986731	-3.42066	0.000624691	0.00118925
tdh	611.853	0.337283	0.0986697	3.41831	0.000630119	0.00119893
yfcO	377.743	-0.415316	0.12153	-3.41739	0.000632237	0.00120231
puuB	452.475	-0.384875	0.112642	-3.4168	0.00063361	0.00120427
wcaB	599.391	-0.342395	0.100233	-3.416	0.000635476	0.00120716
yfhK	497.662	0.368272	0.107813	3.41585	0.000635842	0.00120721
adiY	344.81	0.429036	0.125624	3.41523	0.000637282	0.00120929
yhaM	456.864	0.380535	0.111443	3.41461	0.000638745	0.00121141
pfs	11.1341	2.69456	0.789345	3.41367	0.000640942	0.00121492
csgE	212.93	-0.535558	0.157189	-3.40709	0.000656604	0.00124394
lsrG	621.13	-0.335372	0.0985493	-3.40308	0.000666297	0.00126163
nirC	50.5477	1.10532	0.325107	3.39987	0.000674179	0.00127518
ybgJ	476.855	-0.375213	0.110356	-3.40001	0.000673831	0.00127518
garP	351.63	0.42272	0.124551	3.39395	0.000688915	0.00130235
pdxY	323.348	-0.442059	0.130356	-3.39116	0.000695966	0.00131498
hybB	405.599	0.396434	0.116942	3.39002	0.000698884	0.00131978
yghU	520.082	0.359131	0.105961	3.38927	0.00070079	0.00132267
nrdE	324.12	-0.441398	0.130253	-3.38879	0.000702026	0.00132429
dusC	150.591	-0.632401	0.187046	-3.38099	0.000722257	0.00136173
gshB	711.589	-0.312959	0.092627	-3.3787	0.000728298	0.00137238
yfbK	523.596	-0.35899	0.106302	-3.37706	0.000732644	0.00137983
ycgY	759.756	-0.304395	0.0902139	-3.37414	0.000740461	0.00139381
ycaL	381.916	0.404583	0.119988	3.37186	0.00074663	0.00140467
melA	390.247	0.400633	0.118876	3.37017	0.000751224	0.00141256
recG	695.929	-0.315158	0.093532	-3.36952	0.000752986	0.00141511
yqhA	586.069	0.33904	0.100661	3.36813	0.000756793	0.00142151
ydeW	540.247	-0.353213	0.104958	-3.36527	0.000764696	0.00143559
yfaV	443.955	-0.381873	0.113486	-3.36494	0.000765615	0.00143655
yliD	340.051	-0.428272	0.127421	-3.36108	0.00077638	0.00145597
hisQ	284.923	-0.463293	0.137887	-3.35995	0.000779579	0.00146119
ptsI	5.21611	5.14555	1.53235	3.35795	0.000785215	0.00147097
yjhT	401.219	0.394122	0.117462	3.35532	0.000792736	0.00148427
yhgF	314.091	0.439388	0.130975	3.35475	0.000794358	0.00148652
yhaJ	441.261	0.378853	0.112987	3.35306	0.000799237	0.00149485
hcaD	384.12	0.401285	0.119723	3.35178	0.000802929	0.00150096
yqiA	533.074	0.351346	0.104874	3.35016	0.000807642	0.00150897
rsuA	524.074	-0.355342	0.106255	-3.34424	0.000825083	0.00154074
pppA	686.607	0.312968	0.0935925	3.34395	0.000825957	0.00154155
yggV	368.178	0.407768	0.121961	3.34343	0.0008275	0.00154361
fecB	702.292	0.309545	0.0926713	3.34024	0.000837051	0.0015606
sucD	409.672	0.388835	0.116423	3.33984	0.000838277	0.00156206
ycfN	298.49	-0.4508	0.135112	-3.33649	0.000848426	0.00158014
leuB	543.318	0.346869	0.104052	3.3336	0.000857286	0.00159579
ydcA	458.782	-0.373185	0.112029	-3.33115	0.00086488	0.00160908
ybeZ	252.736	-0.483398	0.145146	-3.33042	0.000867156	0.00161246
trmH	630.168	0.323781	0.0973522	3.32587	0.000881426	0.00163726
ydcN	352.979	-0.416743	0.125299	-3.326	0.000881018	0.00163726
yqiG	660.835	0.31625	0.09521	3.32161	0.00089501	0.00166162
yjcH	571.327	0.338141	0.101837	3.3204	0.000898881	0.00166793
elbA	515.733	-0.354943	0.106938	-3.31914	0.000902955	0.00167372
yhdX	238.601	0.489601	0.147507	3.31918	0.00090282	0.00167372
oppF	365.927	-0.407849	0.123211	-3.31016	0.000932434	0.00172746
lldP	389.778	0.393619	0.118933	3.30959	0.000934317	0.00172918
yjiJ	322.063	0.428672	0.129524	3.30958	0.000934349	0.00172918
ygiE	582.264	0.334097	0.100967	3.30898	0.000936379	0.00173203
ydhM	209.529	-0.523768	0.15833	-3.30808	0.00093939	0.00173669
yfcY	450.463	-0.371772	0.11284	-3.2947	0.00098528	0.00182057
rcsF	296.299	0.442531	0.134414	3.29229	0.000993765	0.00183529
yncG	369.251	-0.403735	0.122712	-3.2901	0.0010015	0.0018486
yjiE	419.614	0.379268	0.115298	3.28945	0.00100382	0.00185192
bolA	583.791	0.331368	0.100846	3.28589	0.00101661	0.00187452
stfQ	373.788	-0.400715	0.122039	-3.28351	0.00102525	0.00188946
araG	333.212	-0.422188	0.128592	-3.28317	0.00102647	0.00189072
ygaT	316.14	0.428426	0.130613	3.28012	0.00103764	0.00191029
motB	284.676	-0.452027	0.137911	-3.27766	0.00104672	0.00192601
ydjL	329.577	-0.423258	0.12922	-3.2755	0.00105477	0.0019398
alsB	763.203	0.293291	0.08963	3.27225	0.00106696	0.0019612
yhgN	371.121	0.397596	0.121554	3.27095	0.00107187	0.0019692
yfiM	318.415	0.425643	0.130204	3.26905	0.00107909	0.00198142
ulaE	528.635	0.343919	0.105251	3.26761	0.00108461	0.00199053
yahB	1015.18	0.273255	0.0836446	3.26686	0.00108749	0.00199477
menE	364.683	-0.402583	0.123412	-3.26212	0.00110583	0.00202736
ycfT	516.786	-0.348467	0.106849	-3.26128	0.00110909	0.00203227
ybjX	309.507	-0.433295	0.132883	-3.26072	0.00111132	0.00203529
ybjK	341.409	0.411048	0.126171	3.25785	0.00112258	0.00205485
yjiS	389.183	0.387215	0.119034	3.25299	0.00114198	0.00208928
glgS	499.262	0.349739	0.107687	3.24775	0.00116321	0.00212702
ygfS	470.347	-0.359748	0.110923	-3.24323	0.00118182	0.00215993
ybcJ	503.845	-0.349809	0.107953	-3.24037	0.00119376	0.00218061
yfcH	265.262	-0.460286	0.142138	-3.2383	0.00120246	0.00219535
gntT	325.418	0.417255	0.128903	3.23697	0.00120807	0.00220445
acnA	372.087	-0.39565	0.12228	-3.23561	0.00121382	0.00221266
cvpA	64.2052	-0.941803	0.291067	-3.23569	0.00121347	0.00221266
ycdB	576.053	-0.329876	0.102002	-3.23402	0.00122059	0.00222385
galS	786.246	-0.288075	0.0890983	-3.23323	0.00122401	0.00222892
yjfO	435.561	0.366509	0.113541	3.22797	0.0012467	0.00226908
yjiH	432.187	0.36752	0.113911	3.22638	0.00125366	0.00228056
elaD	300.795	-0.434186	0.134584	-3.22614	0.00125471	0.0022813
djlA	661.384	0.30701	0.0951742	3.22577	0.00125633	0.00228306
pstA	64.0631	0.919561	0.285754	3.21802	0.0012908	0.00234449
gspC	107.449	0.707633	0.219979	3.21683	0.00129616	0.00235301
ybjN	266.158	-0.456384	0.141882	-3.21664	0.00129701	0.00235334
thrC	631.488	0.312405	0.0972498	3.21239	0.00131633	0.00238717
yjgZ	680.367	0.301778	0.0939691	3.21146	0.00132063	0.00239372
yehX	347.971	-0.404841	0.126104	-3.21037	0.00132566	0.00240161
ebgR	763.657	0.287123	0.0896013	3.20445	0.00135322	0.00245027
yjeN	65.9677	0.899373	0.281419	3.19585	0.00139418	0.00252314
hyaF	323.889	-0.415845	0.130194	-3.19404	0.00140297	0.00253775
melR	395.503	0.376739	0.118165	3.18824	0.00143143	0.00258525
ugd	209.034	-0.505223	0.158453	-3.18848	0.0014302	0.00258525
yabP	343.869	0.400989	0.125767	3.18834	0.0014309	0.00258525
sanA	473.04	-0.352237	0.110654	-3.18324	0.00145638	0.00262896
ychN	461.923	-0.355424	0.111688	-3.18229	0.00146115	0.00263621
seqA	12.7493	-2.40093	0.756514	-3.17367	0.00150523	0.00271333
yjdK	590.49	0.318376	0.100319	3.17363	0.00150544	0.00271333
yjhC	753.833	0.285178	0.0900245	3.16778	0.00153609	0.00276716
rph	474.706	-0.349681	0.110494	-3.16471	0.00155237	0.00279506
uspE	680.25	-0.298749	0.0944284	-3.16376	0.00155744	0.00280275
fliA	221.595	-0.487411	0.154079	-3.16339	0.00155943	0.0028049
pin	578.187	-0.321947	0.101839	-3.16133	0.00157048	0.00282333
ygiT	421.368	0.363681	0.115065	3.16066	0.00157412	0.00282842
ybcO	364.653	-0.389809	0.123368	-3.15973	0.00157917	0.00283607
eutL	632.066	-0.308663	0.0977005	-3.15928	0.00158161	0.00283899
ygbF	384.341	-0.380668	0.120517	-3.15864	0.00158509	0.00284379
fur	83.8675	-0.797785	0.252915	-3.15436	0.00160849	0.00288429
sfsB	252.848	0.452832	0.143686	3.15154	0.00162413	0.00291086
ulaF	718.006	0.28901	0.0917796	3.14895	0.00163857	0.00293525
fimH	437.673	0.356502	0.113357	3.14495	0.00166112	0.0029729
moeA	227.51	0.473838	0.150667	3.14493	0.00166128	0.0029729
yqgB	575.401	0.318748	0.101512	3.13999	0.00168952	0.0030219
yaeF	473.909	0.344209	0.109891	3.13227	0.00173458	0.00310092
ypdF	358.369	-0.388733	0.124361	-3.12584	0.00177295	0.00316791
agaS	331.031	0.399703	0.12793	3.12438	0.0017818	0.0031821
uxuR	218.308	0.480021	0.153656	3.12401	0.00178405	0.00318452
yggJ	373.573	-0.381061	0.122036	-3.12254	0.00179296	0.0031988
ydjO	283.297	-0.430342	0.138143	-3.1152	0.00183822	0.00327788
yjeB	79.5508	-0.80814	0.259645	-3.11248	0.0018552	0.00330648
flgC	353.326	-0.38927	0.12514	-3.11066	0.00186667	0.00332524
yciU	265.83	-0.441265	0.14189	-3.10992	0.00187138	0.00333194
yfaH	380.501	-0.37582	0.121047	-3.10473	0.00190452	0.00338923
yacL	264.772	0.436701	0.14095	3.09828	0.00194649	0.00346217
fliK	139.646	-0.600974	0.194149	-3.09543	0.00196529	0.00349385
eco	539.736	-0.324673	0.104933	-3.09411	0.00197403	0.00350761
ddg	459.65	-0.345847	0.111873	-3.09142	0.00199205	0.00353785
ygiN	461.768	0.342517	0.110983	3.0862	0.00202734	0.0035987
nrfF	557.995	0.317229	0.102889	3.0832	0.00204787	0.00363148
ygiZ	588.998	0.30967	0.100436	3.08326	0.00204748	0.00363148
aroA	7.19919	3.2305	1.04791	3.0828	0.00205062	0.00363453
ydhP	351.257	-0.38598	0.125467	-3.07635	0.0020955	0.00371221
yhaC	358.991	0.379107	0.123364	3.07307	0.00211867	0.00375136
yjeJ	385.132	0.366715	0.119538	3.06777	0.0021566	0.00381661
yjhG	786.879	0.271956	0.0886643	3.06726	0.00216031	0.00382126
ygdQ	648.889	-0.295691	0.0965066	-3.06394	0.00218441	0.00386001
ymfE	376.712	-0.37243	0.121552	-3.06395	0.00218438	0.00386001
ycfR	610.002	-0.304206	0.0993286	-3.06262	0.00219408	0.00387514
rnk	329.171	-0.394632	0.129191	-3.05463	0.00225335	0.00397784
yfdN	400.968	-0.361126	0.118269	-3.05344	0.00226237	0.00399175
panD	11.0255	2.35886	0.772923	3.05187	0.00227421	0.00401063
yadS	532.1	0.320229	0.104959	3.05099	0.00228091	0.00402043
ygjG	621.27	0.298889	0.0979908	3.05017	0.00228711	0.00402934
ygbE	395.914	-0.362153	0.11888	-3.04636	0.00231628	0.0040787
[truncated: 1,521 more rows]

## Sheet: ValidationScreen(odd)
gene	baseMean	log2FoldChange	lfcSE	stat	pvalue	padj
atpC	8507.27	4.83981	0.0951325	50.8744	6.06e-172	6.9e-169
atpG	4316.43	3.58911	0.0795433	45.1214	6.06e-172	6.9e-169
crr	942.994	4.89201	0.116284	42.0696	6.06e-172	6.9e-169
cytR	13303	4.25513	0.105201	40.4477	6.06e-172	6.9e-169
envZ	3826.17	6.78231	0.108649	62.4241	6.06e-172	6.9e-169
fadR	5739.88	3.24787	0.0833532	38.9651	6.06e-172	6.9e-169
glgA	2171.36	2.88151	0.075767	38.0312	6.06e-172	6.9e-169
ompR	3440.73	6.96214	0.115167	60.4525	6.06e-172	6.9e-169
pgm	1054.67	3.52698	0.0927729	38.0173	6.06e-172	6.9e-169
polA	12439.7	4.87007	0.104337	46.6764	6.06e-172	6.9e-169
poxA	4714.09	4.80848	0.0852282	56.4189	6.06e-172	6.9e-169
rfaG	1653.69	4.18736	0.0874456	47.8853	6.06e-172	6.9e-169
rfaH	1911.42	5.23779	0.0970716	53.958	6.06e-172	6.9e-169
rfaQ	5821.55	3.81125	0.0846615	45.0175	6.06e-172	6.9e-169
rnhA	1073.42	4.69083	0.10699	43.8436	6.06e-172	6.9e-169
rpmE	2038.77	3.97758	0.0820039	48.5048	6.06e-172	6.9e-169
sodA	860.072	4.38862	0.111056	39.5172	6.06e-172	6.9e-169
speD	2009	2.88427	0.0764368	37.7341	6.06e-172	6.9e-169
trkA	1494.78	3.18582	0.0819304	38.8845	6.06e-172	6.9e-169
udk	1485.64	3.10436	0.0815929	38.0469	6.06e-172	6.9e-169
ybfE	7262.39	5.93791	0.097074	61.1689	6.06e-172	6.9e-169
yieP	27399.7	6.90684	0.132121	52.2766	6.06e-172	6.9e-169
yohJ	10919.1	6.52608	0.107321	60.8092	6.06e-172	6.9e-169
yohK	14882.6	6.66352	0.113876	58.5158	6.06e-172	6.9e-169
yraO	10192.1	5.33687	0.100683	53.0064	6.06e-172	6.9e-169
nagD	2043.6	2.82472	0.0760683	37.134	7.94e-302	1.07e-299
nupC	180650	8.80384	0.238246	36.9528	6.57e-299	8.56e-297
mioC	1991.97	2.76155	0.0760887	36.2938	2.03e-288	2.55e-286
cyaA	1013.88	3.3257	0.0922146	36.0648	8.08e-285	9.8e-283
atpA	6814.82	3.11754	0.0868566	35.893	3.93e-282	4.61e-280
priA	972.337	3.28301	0.09317	35.2368	5.47e-272	6.2e-270
hupA	933.203	-3.43982	0.100293	-34.2979	8.43e-258	9.27e-256
zitB	763.839	3.37004	0.102718	32.8088	4.41e-236	4.7e-234
ppc	1200.07	2.64726	0.0836085	31.6626	5.09e-220	5.27e-218
phoR	1580.05	2.46498	0.0778546	31.6614	5.29e-220	5.32e-218
cysP	2094.15	2.15838	0.0740747	29.1379	1.19e-186	1.16e-184
secB	916.263	2.62221	0.0905321	28.9645	1.85e-184	1.75e-182
sucB	3073.04	2.10718	0.0736265	28.6199	3.8e-180	3.52e-178
nadB	443.789	6.30888	0.226369	27.8699	6.18e-171	5.58e-169
trkH	2187.86	2.03834	0.0735749	27.7043	6.2e-169	5.46e-167
malG	1887.79	2.06805	0.074702	27.6839	1.09e-168	9.35e-167
ytfP	2318.74	1.96837	0.0731871	26.8951	2.51e-159	2.1e-157
pyrI	721.152	-2.70228	0.102775	-26.2932	2.29e-152	1.87e-150
asnC	1215.75	2.12231	0.0812977	26.1055	3.16e-150	2.53e-148
sapC	902.759	2.29512	0.0893606	25.6838	1.77e-145	1.39e-143
yzfA	1583.11	1.95806	0.0764272	25.6199	9.16e-145	7e-143
acnB	669.579	2.60858	0.10193	25.5917	1.89e-144	1.41e-142
ycfM	803.79	-2.45035	0.0964869	-25.3957	2.82e-142	2.06e-140
ptsN	2207.76	1.8538	0.0732168	25.3193	1.96e-141	1.41e-139
cysA	1661.1	1.84377	0.0755781	24.3955	1.91e-131	1.34e-129
yigL	1882.53	1.80541	0.0742208	24.3248	1.07e-130	7.39e-129
cyoC	5714.66	1.98307	0.0819925	24.1861	3.12e-129	2.11e-127
hupB	858.218	-2.24472	0.0928546	-24.1746	4.12e-129	2.73e-127
dhaK	2776.11	1.74556	0.0727775	23.9848	4e-127	2.61e-125
hepA	2638.22	-1.71944	0.0732359	-23.478	6.84e-122	4.37e-120
ygdL	1224.82	-1.89782	0.0817983	-23.2013	4.42e-119	2.78e-117
nadC	284.844	6.10232	0.266428	22.9042	4.22e-116	2.6e-114
rfaY	752.619	2.16901	0.0948798	22.8606	1.15e-115	6.95e-114
ftsN	608.876	2.35459	0.104461	22.5404	1.67e-112	9.94e-111
atpE	4472.82	1.73378	0.0772904	22.4321	1.91e-111	1.12e-109
icd	255.31	4.00869	0.183957	21.7914	2.8e-105	1.61e-103
cyoB	6116.86	1.80668	0.0833792	21.6683	4.09e-104	2.32e-102
cysU	1706.55	1.61008	0.0748553	21.5093	1.27e-102	7.12e-101
recF	767.74	1.99836	0.0934435	21.3857	1.81e-101	9.97e-100
fabF	340.985	-3.24615	0.15272	-21.2555	2.93e-100	1.59e-98
sapD	482.846	2.46381	0.116473	21.1535	2.56e-99	1.37e-97
rhlB	672.541	-2.13643	0.101402	-21.069	1.53e-98	8.05e-97
fruB	752.768	1.95364	0.0939668	20.7907	5.25e-96	2.72e-94
ygdK	907.223	-1.85086	0.0890954	-20.774	7.45e-96	3.8e-94
nagA	281.991	-5.88503	0.283552	-20.7546	1.11e-95	5.59e-94
yicN	4913.82	1.62097	0.078822	20.565	5.65e-94	2.8e-92
rumA	1413.86	1.58799	0.077294	20.5449	8.55e-94	4.18e-92
cysW	1198.15	1.64882	0.080334	20.5245	1.3e-93	6.27e-92
malE	3913.08	1.51105	0.0752377	20.0837	1.03e-89	4.87e-88
yfjG	201.286	4.29195	0.215789	19.8896	5.01e-88	2.35e-86
prmA	3338.39	1.46168	0.073531	19.8785	6.25e-88	2.89e-86
atpF	3258.7	1.4532	0.073332	19.8167	2.14e-87	9.76e-86
sapB	370.686	2.60745	0.132768	19.6392	7.15e-86	3.23e-84
fadA	2964.83	1.42417	0.0727158	19.5855	2.06e-85	9.16e-84
glnG	458.974	2.24669	0.117688	19.0902	3.05e-81	1.34e-79
sdaC	326.957	-2.84014	0.148947	-19.0681	4.64e-81	2.02e-79
cyoD	6944.56	1.64095	0.0863066	19.013	1.33e-80	5.71e-79
proQ	274.146	-3.21762	0.169238	-19.0123	1.35e-80	5.71e-79
cyoE	7033.98	1.61814	0.0866154	18.6819	6.96e-78	2.91e-76
atpB	2827.35	1.35345	0.0724617	18.6782	7.45e-78	3.08e-76
uhpT	2838.72	1.33996	0.0724658	18.4909	2.45e-76	1e-74
cyoA	5180.76	1.4614	0.0797379	18.3276	4.99e-75	2.02e-73
ubiC	3055.23	1.33348	0.0728104	18.3144	6.35e-75	2.54e-73
glnE	452.917	-2.19075	0.121101	-18.0903	3.8e-73	1.5e-71
purR	309.256	-2.69051	0.150874	-17.8329	3.92e-71	1.53e-69
rfaI	885.235	1.53009	0.0873673	17.5133	1.13e-68	4.39e-67
csdA	652.013	-1.72324	0.100381	-17.167	4.69e-66	1.79e-64
trxA	840.347	1.52015	0.0889075	17.0981	1.53e-65	5.8e-64
rng	365.214	2.2289	0.130621	17.0638	2.76e-65	1.03e-63
panE	167.759	3.68761	0.216428	17.0385	4.26e-65	1.58e-63
rnd	247.237	-2.89102	0.171603	-16.8472	1.1e-63	4.03e-62
panD	188.709	3.22476	0.194002	16.6223	4.8e-62	1.74e-60
fruK	268.995	-2.66489	0.161025	-16.5496	1.61e-61	5.79e-60
metB	2131.32	1.198	0.0726066	16.4999	3.68e-61	1.31e-59
yhhK	168.776	3.45885	0.210065	16.4656	6.48e-61	2.28e-59
fieF	1379.44	1.24795	0.0771443	16.1768	7.35e-59	2.56e-57
hslO	2588.24	1.16624	0.0721338	16.1677	8.53e-59	2.94e-57
exbD	564.36	1.69035	0.104745	16.1377	1.39e-58	4.73e-57
rfaF	124.928	5.01373	0.310871	16.128	1.62e-58	5.48e-57
thiE	122.896	5.28462	0.332094	15.913	5.15e-57	1.72e-55
yjaG	2329.88	1.14267	0.0722152	15.8231	2.15e-56	7.15e-55
gpmA	228.148	2.66789	0.168623	15.8216	2.21e-56	7.26e-55
cyaY	1453.21	1.2064	0.0763109	15.809	2.7e-56	8.79e-55
yihF	1924.42	1.15478	0.0732039	15.7748	4.64e-56	1.5e-54
phnK	2301.63	1.1283	0.0722406	15.6187	5.43e-55	1.74e-53
tig	715.192	-1.48557	0.0956702	-15.528	2.24e-54	7.1e-53
ndk	164.403	3.22116	0.207461	15.5266	2.29e-54	7.2e-53
truB	1163.57	1.24446	0.0801798	15.5209	2.51e-54	7.8e-53
smtA	583.151	-1.60244	0.104641	-15.3137	6.19e-53	1.91e-51
ilvE	1932	1.11102	0.0731383	15.1907	4.08e-52	1.25e-50
exbB	490.725	1.68998	0.111416	15.1681	5.75e-52	1.74e-50
pdxK	2127.75	1.09838	0.0725326	15.1433	8.39e-52	2.52e-50
yigB	1699.3	1.11269	0.0742784	14.98	9.92e-51	2.96e-49
chpS	158.355	3.13719	0.209635	14.965	1.24e-50	3.68e-49
xylA	1381.24	1.1465	0.0769981	14.89	3.83e-50	1.12e-48
metL	952.918	-1.27465	0.0857092	-14.8718	5.02e-50	1.46e-48
fadD	465.296	-1.72273	0.116329	-14.8092	1.28e-49	3.69e-48
prfC	453.204	1.69899	0.115509	14.7087	5.66e-49	1.61e-47
ytfN	296.019	-2.17296	0.147734	-14.7085	5.68e-49	1.61e-47
gor	1185.41	1.16841	0.0797053	14.6591	1.18e-48	3.32e-47
mdtK	121.72	-4.87857	0.335391	-14.5459	6.2e-48	1.73e-46
greA	123.959	-4.19294	0.289435	-14.4866	1.47e-47	4.08e-46
yihG	2239.21	1.03335	0.0722659	14.2993	2.21e-46	6.08e-45
rimI	126.114	-3.90261	0.273094	-14.2904	2.51e-46	6.85e-45
glgX	1458.36	1.08359	0.0761214	14.235	5.55e-46	1.5e-44
sapF	227.387	2.32987	0.165207	14.1028	3.65e-45	9.8e-44
uspA	1402.22	1.08073	0.0766939	14.0915	4.28e-45	1.14e-43
rraA	2042.7	1.02212	0.0726982	14.0597	6.71e-45	1.78e-43
kdsC	1408.23	1.07491	0.0766241	14.0283	1.05e-44	2.75e-43
gltP	3110.4	1.01983	0.0727384	14.0205	1.17e-44	3.05e-43
malZ	855.761	-1.23173	0.0886731	-13.8906	7.22e-44	1.87e-42
rbsB	1317.48	1.06916	0.0776696	13.7655	4.11e-43	1.05e-41
rhaA	1430.91	1.03833	0.07635	13.5996	4.03e-42	1.03e-40
rfaD	104.049	6.31838	0.465515	13.5729	5.8e-42	1.47e-40
yidJ	4220.63	1.02156	0.0760476	13.4331	3.87e-41	9.72e-40
fdoG	2363.42	0.967115	0.0720652	13.42	4.62e-41	1.15e-39
yqiB	2656.86	0.966548	0.0720471	13.4155	4.91e-41	1.22e-39
fabR	618.543	1.33149	0.0996569	13.3608	1.03e-40	2.52e-39
ycdC	1072.07	-1.09926	0.082403	-13.3401	1.35e-40	3.31e-39
pck	1906.17	0.97113	0.0731269	13.2801	3.02e-40	7.33e-39
yjcD	2080.51	0.959842	0.0725515	13.2298	5.9e-40	1.42e-38
yqaB	437.677	1.53499	0.116667	13.157	1.55e-39	3.71e-38
gntX	164.104	2.56364	0.196518	13.0453	6.76e-39	1.61e-37
bioH	107.044	3.39775	0.26062	13.0372	7.52e-39	1.78e-37
yqjI	797.113	-1.17796	0.090801	-12.973	1.74e-38	4.08e-37
grxC	2495.74	0.932743	0.0719809	12.9582	2.11e-38	4.92e-37
ydhQ	185.654	-2.44448	0.189423	-12.9049	4.22e-38	9.78e-37
ybeX	832.737	1.13995	0.0883964	12.8959	4.75e-38	1.09e-36
priC	1650.51	0.955166	0.0744514	12.8294	1.12e-37	2.56e-36
gltS	5265.39	1.022	0.0799072	12.7899	1.87e-37	4.24e-36
rhtB	1514.85	0.964808	0.0754944	12.7799	2.12e-37	4.79e-36
ptsP	404.725	-1.57188	0.123048	-12.7746	2.27e-37	5.1e-36
radA	1945.63	0.926454	0.0729466	12.7004	5.88e-37	1.31e-35
rssA	495.099	-1.41407	0.111577	-12.6735	8.3e-37	1.84e-35
yhbG	2818.1	-0.900974	0.072418	-12.4413	1.56e-35	3.43e-34
dedD	88.3258	-4.82399	0.388281	-12.424	1.94e-35	4.23e-34
ypeC	1272.85	0.969366	0.0781538	12.4033	2.51e-35	5.45e-34
tatA	4407.54	0.949718	0.0766923	12.3835	3.21e-35	6.93e-34
rfaJ	2462.28	0.88877	0.0719663	12.3498	4.88e-35	1.05e-33
yieL	1159.48	0.986078	0.0799184	12.3386	5.61e-35	1.2e-33
rnb	450.001	1.41051	0.114792	12.2875	1.06e-34	2.24e-33
yhbE	2146.84	0.888521	0.0723503	12.2808	1.15e-34	2.42e-33
phnJ	1836.45	0.900514	0.0733742	12.2729	1.27e-34	2.65e-33
yfaL	532.083	-1.32008	0.107668	-12.2607	1.47e-34	3.07e-33
damX	668.398	-1.18981	0.0972682	-12.2322	2.09e-34	4.33e-33
yidK	3176.73	0.886926	0.072828	12.1784	4.05e-34	8.34e-33
pepA	1387.95	0.933959	0.0767063	12.1758	4.18e-34	8.56e-33
dppC	1400.8	0.924909	0.0765581	12.0811	1.33e-33	2.7e-32
yiiX	1211.63	-0.953245	0.0795801	-11.9784	4.61e-33	9.32e-32
fadL	252.151	-1.87685	0.156748	-11.9737	4.88e-33	9.81e-32
hslV	2367.34	0.859636	0.0720042	11.9387	7.44e-33	1.49e-31
rbsC	1651.63	0.884847	0.0743897	11.8947	1.26e-32	2.51e-31
yoaH	207.389	-2.07404	0.174623	-11.8773	1.55e-32	3.07e-31
yajR	1713.25	0.869662	0.0739917	11.7535	6.77e-32	1.33e-30
prpB	381.14	1.45337	0.123981	11.7225	9.77e-32	1.91e-30
glpF	1477	0.885485	0.0757675	11.6869	1.49e-31	2.89e-30
sufI	954.669	-0.990018	0.0849893	-11.6487	2.33e-31	4.5e-30
frwC	2563.66	0.837646	0.0719422	11.6433	2.48e-31	4.77e-30
trxB	380.352	1.43221	0.124034	11.5469	7.65e-31	1.46e-29
argB	3024.84	0.835611	0.0724871	11.5277	9.56e-31	1.82e-29
recJ	1733.31	-0.853811	0.0742298	-11.5023	1.28e-30	2.43e-29
fdoI	1392.45	0.879672	0.0766097	11.4825	1.62e-30	3.04e-29
dhaL	711.211	1.06871	0.0936173	11.4157	3.49e-30	6.53e-29
fruA	1031.95	0.937316	0.0823508	11.382	5.14e-30	9.52e-29
rffH	1464.63	0.863513	0.0758662	11.382	5.14e-30	9.52e-29
mraW	95.4737	-3.23145	0.284035	-11.3769	5.45e-30	1e-28
bioF	71.6368	3.73926	0.329854	11.3361	8.69e-30	1.59e-28
ycbZ	546.214	1.1846	0.104729	11.3111	1.16e-29	2.11e-28
gph	1103.2	0.910078	0.0808566	11.2555	2.18e-29	3.95e-28
ysaB	930.899	0.955733	0.0849238	11.254	2.21e-29	3.99e-28
ihfB	61.2988	4.4965	0.399885	11.2445	2.47e-29	4.42e-28
glgB	584.875	1.13958	0.101599	11.2165	3.39e-29	6.05e-28
ybaN	1453.97	0.847248	0.0759516	11.1551	6.76e-29	1.2e-27
bioC	59.4038	4.56993	0.411158	11.1148	1.06e-28	1.88e-27
chpR	1337.58	0.858134	0.0772202	11.1128	1.09e-28	1.91e-27
yhjJ	1921.4	0.805374	0.0729655	11.0377	2.51e-28	4.4e-27
fdhE	1654.35	0.816326	0.0743274	10.9828	4.62e-28	8.05e-27
yifO	1262.55	0.858391	0.0781927	10.9779	4.88e-28	8.46e-27
yiiS	1921.93	0.800651	0.0729596	10.9739	5.1e-28	8.8e-27
nuoG	1293.29	0.85279	0.0777675	10.9659	5.57e-28	9.57e-27
nuoN	757.264	0.999454	0.0912844	10.9488	6.73e-28	1.15e-26
dgkA	378.617	1.34877	0.123993	10.8779	1.47e-27	2.5e-26
ycdS	86.7626	-3.21731	0.297096	-10.8292	2.5e-27	4.23e-26
fdhD	1460.24	0.820188	0.0758763	10.8095	3.1e-27	5.22e-26
deoR	178.213	-2.02465	0.18736	-10.8062	3.22e-27	5.39e-26
nagB	875.473	0.934735	0.0865996	10.7937	3.68e-27	6.14e-26
fadB	1020.42	0.890283	0.0825619	10.7832	4.13e-27	6.86e-26
nuoH	954.867	0.905188	0.0841894	10.7518	5.81e-27	9.6e-26
mdoG	599.22	-1.09026	0.101465	-10.7451	6.25e-27	1.03e-25
sdaA	908.258	-0.925405	0.086199	-10.7357	6.92e-27	1.13e-25
phnG	2204.59	0.772579	0.0721784	10.7038	9.77e-27	1.59e-25
ilvL	1824.19	0.782785	0.0733617	10.6702	1.4e-26	2.27e-25
tgt	479.505	-1.19615	0.112269	-10.6543	1.67e-26	2.69e-25
ptsA	1837.11	0.780403	0.0733013	10.6465	1.81e-26	2.91e-25
cpxA	91.1594	-3.01156	0.283009	-10.6412	1.92e-26	3.06e-25
hofQ	1557.04	0.797604	0.0750169	10.6323	2.11e-26	3.36e-25
nuoB	1521.13	0.800569	0.0753098	10.6303	2.15e-26	3.41e-25
dppB	1181.17	0.843636	0.0794129	10.6234	2.32e-26	3.66e-25
gcvA	169.806	-2.03612	0.192009	-10.6043	2.85e-26	4.47e-25
ade	3805.89	0.787344	0.0745714	10.5583	4.65e-26	7.27e-25
sgbE	2244.17	0.75433	0.0721046	10.4616	1.3e-25	2.02e-24
yqgC	115.375	-2.51031	0.240196	-10.4511	1.45e-25	2.25e-24
mtlA	2588.96	0.750162	0.071914	10.4314	1.78e-25	2.75e-24
nuoA	1246.84	0.815295	0.0783793	10.4019	2.43e-25	3.73e-24
bioD	60.3319	3.72668	0.358468	10.3961	2.58e-25	3.95e-24
rbsA	995.442	0.864068	0.0831197	10.3955	2.6e-25	3.96e-24
pstS	290.124	1.46825	0.141257	10.3942	2.63e-25	3.99e-24
pnp	90.163	-2.92708	0.28181	-10.3867	2.85e-25	4.3e-24
aslB	1990.81	0.754958	0.0726967	10.385	2.9e-25	4.36e-24
yaaH	2869.61	0.749256	0.0721895	10.379	3.09e-25	4.62e-24
ycjV	411.153	-1.25139	0.120577	-10.3783	3.11e-25	4.64e-24
pstB	1720.66	0.76352	0.0738865	10.3337	4.96e-25	7.36e-24
yieF	2703	0.743782	0.0719879	10.332	5.05e-25	7.46e-24
yifN	1508.48	0.77217	0.0754053	10.2403	1.31e-24	1.93e-23
ycbY	571.782	-1.05587	0.103435	-10.208	1.83e-24	2.68e-23
trkD	1337	0.785297	0.0771746	10.1756	2.55e-24	3.72e-23
yihV	2015.9	0.738573	0.0726098	10.1718	2.65e-24	3.85e-23
qor	1326.45	0.784748	0.0773027	10.1516	3.26e-24	4.72e-23
yjcO	2468.49	0.728167	0.0718941	10.1283	4.14e-24	5.96e-23
udp	1641.24	0.750777	0.0743744	10.0946	5.84e-24	8.38e-23
pabC	68.8102	-3.4694	0.343767	-10.0923	5.98e-24	8.55e-23
yifL	1419.5	0.76753	0.0762438	10.0668	7.75e-24	1.1e-22
yafX	1209.26	0.792891	0.0789219	10.0465	9.52e-24	1.35e-22
ompL	1634.49	0.746899	0.0744171	10.0367	1.05e-23	1.49e-22
speA	95.8466	-2.6754	0.266625	-10.0343	1.08e-23	1.52e-22
yfaE	245.966	1.53776	0.153419	10.0233	1.2e-23	1.69e-22
rhaB	1256.47	0.783516	0.0782223	10.0165	1.29e-23	1.8e-22
yhdA	3561.39	0.738656	0.0738002	10.0089	1.39e-23	1.94e-22
bcp	328.565	-1.34366	0.134387	-9.99842	1.55e-23	2.14e-22
yciB	96.6468	-2.63839	0.264614	-9.97072	2.05e-23	2.82e-22
yihD	1185.58	0.788039	0.0792893	9.93879	2.82e-23	3.88e-22
rssB	97.4178	-2.61283	0.26315	-9.92904	3.11e-23	4.26e-22
htpX	1020.38	-0.824057	0.0830277	-9.92508	3.24e-23	4.42e-22
cpxR	1636.98	0.736821	0.0743963	9.90401	4e-23	5.43e-22
yibA	2192.48	0.713045	0.0721759	9.87927	5.12e-23	6.93e-22
mutM	3082.99	0.716544	0.0725649	9.87453	5.37e-23	7.24e-22
pabB	54.98	-4.59523	0.467008	-9.83973	7.59e-23	1.02e-21
gntY	127.487	2.12981	0.216475	9.83858	7.68e-23	1.03e-21
yicC	1754.47	0.723775	0.0736791	9.82334	8.93e-23	1.19e-21
ilvM	1278.19	0.764354	0.0779106	9.81066	1.01e-22	1.34e-21
yqiC	208.499	1.63328	0.166862	9.78821	1.27e-22	1.67e-21
uhpB	1697.58	0.724237	0.0739998	9.78701	1.28e-22	1.69e-21
glgC	692.961	0.922891	0.0943616	9.78037	1.37e-22	1.79e-21
yiiR	1006.65	0.804875	0.0828028	9.72039	2.47e-22	3.23e-21
ymfL	120.347	-2.23525	0.230069	-9.71557	2.59e-22	3.37e-21
yjcB	4759	0.756197	0.0779403	9.70227	2.95e-22	3.83e-21
ycbJ	178.882	-1.78077	0.184369	-9.65871	4.52e-22	5.84e-21
rpoZ	6143.48	0.801835	0.0831747	9.64037	5.4e-22	6.96e-21
yifE	162.28	-1.86952	0.194216	-9.62596	6.21e-22	7.98e-21
eptB	1289.84	0.747338	0.0777409	9.61318	7.03e-22	9e-21
yfgD	149.946	-1.94336	0.202726	-9.58614	9.14e-22	1.17e-20
yfgC	103.984	-2.39561	0.250004	-9.58229	9.49e-22	1.21e-20
lldD	2660.21	0.687615	0.0719336	9.55902	1.19e-21	1.5e-20
ycbG	136.421	-2.0351	0.213457	-9.53403	1.51e-21	1.91e-20
selB	757.402	0.864182	0.0910979	9.48629	2.39e-21	3.01e-20
nudF	2117.85	0.684697	0.072318	9.46787	2.86e-21	3.58e-20
kdgT	1968.2	0.688283	0.072741	9.4621	3.02e-21	3.77e-20
yigZ	1822.02	0.6933	0.0733262	9.45501	3.23e-21	4.02e-20
gldA	1570.72	0.70767	0.0748562	9.45373	3.27e-21	4.05e-20
yieG	705.831	0.884987	0.0936263	9.45233	3.31e-21	4.09e-20
yraM	375.154	-1.18597	0.125504	-9.4497	3.4e-21	4.18e-20
yjgM	2444.19	0.67905	0.0718826	9.44665	3.5e-21	4.29e-20
yhdJ	2075.38	0.679518	0.0724191	9.38313	6.4e-21	7.82e-20
sixA	534.104	0.988511	0.105378	9.38065	6.56e-21	7.98e-20
fsaB	1930.17	0.683461	0.0728713	9.37901	6.66e-21	8.06e-20
xylR	1801.98	0.688583	0.0734182	9.3789	6.67e-21	8.06e-20
ydhB	109.481	-2.26251	0.241301	-9.37629	6.83e-21	8.23e-20
yciQ	416.305	-1.11887	0.119362	-9.37372	7e-21	8.41e-20
nuoJ	385.494	1.14616	0.122363	9.36687	7.47e-21	8.94e-20
arcA	41.3653	5.07991	0.543828	9.34101	9.54e-21	1.14e-19
ksgA	272.667	1.35335	0.145076	9.32858	1.07e-20	1.28e-19
entA	543.488	0.971756	0.104537	9.29577	1.46e-20	1.73e-19
metE	2133.35	0.67189	0.0722796	9.2957	1.46e-20	1.73e-19
mdoH	697.023	-0.881223	0.094825	-9.29314	1.5e-20	1.76e-19
ubiF	43.9973	4.10135	0.442137	9.2762	1.76e-20	2.05e-19
yrfG	2053.17	0.672288	0.0724753	9.2761	1.76e-20	2.05e-19
sucC	1036.48	0.760703	0.0820779	9.26807	1.9e-20	2.21e-19
yjcP	2743.33	0.666795	0.0720015	9.26084	2.03e-20	2.35e-19
frlD	2322.87	0.66578	0.0719663	9.25127	2.22e-20	2.57e-19
ilvD	1548.44	0.693542	0.0750243	9.24423	2.37e-20	2.73e-19
fpr	1616.8	0.68859	0.0745058	9.2421	2.42e-20	2.78e-19
rhaT	1587.54	0.689024	0.0747195	9.22147	2.93e-20	3.36e-19
pepQ	1709.04	0.681534	0.0739145	9.22057	2.96e-20	3.38e-19
yzcX	440.458	1.05456	0.11496	9.17329	4.59e-20	5.22e-19
bioA	41.3813	4.25694	0.466004	9.13499	6.54e-20	7.42e-19
yobA	750.151	0.828729	0.0913786	9.06918	1.2e-19	1.36e-18
yqiK	1043.43	-0.746619	0.0823945	-9.06152	1.29e-19	1.45e-18
yciS	370.743	-1.14014	0.126011	-9.04792	1.46e-19	1.64e-18
ybfF	1040.85	0.740927	0.0819706	9.03895	1.58e-19	1.77e-18
ilvN	6453.9	0.761682	0.0843208	9.03314	1.67e-19	1.86e-18
aslA	1291.87	0.701415	0.0776835	9.02913	1.73e-19	1.93e-18
nuoC	582.523	0.913553	0.10136	9.01294	2.01e-19	2.23e-18
sbp	1598.4	0.67253	0.074631	9.01141	2.03e-19	2.25e-18
glpE	1957.28	0.655152	0.0727628	9.00393	2.18e-19	2.4e-18
cysD	58.6509	-3.24272	0.360588	-8.99286	2.41e-19	2.65e-18
ptsG	454.171	1.01751	0.113309	8.97993	2.71e-19	2.97e-18
yiaN	572.824	-0.924083	0.102986	-8.9729	2.89e-19	3.16e-18
rdgC	1058.25	-0.736167	0.082058	-8.9713	2.93e-19	3.19e-18
argH	1547.17	0.670971	0.0750225	8.9436	3.77e-19	4.09e-18
yicE	5647.16	0.726609	0.0812952	8.93791	3.97e-19	4.29e-18
cpdA	972.561	-0.750629	0.0840764	-8.92794	4.34e-19	4.68e-18
ibpB	1832.39	0.653833	0.0732599	8.92484	4.46e-19	4.8e-18
yhdU	1639.98	0.663078	0.0743368	8.91991	4.67e-19	5.01e-18
nadA	54.9454	9.44418	1.05988	8.91063	5.07e-19	5.43e-18
yggW	416.916	1.0482	0.11781	8.89737	5.72e-19	6.1e-18
fdx	82.0252	2.41783	0.272583	8.87007	7.31e-19	7.77e-18
phnM	1179.81	0.703441	0.0793247	8.86787	7.46e-19	7.9e-18
nlpA	4076.32	0.668457	0.075451	8.85949	8.04e-19	8.49e-18
yibD	2323.47	0.63619	0.0719548	8.84153	9.44e-19	9.95e-18
yidP	3668.33	0.655102	0.074105	8.84018	9.56e-19	1e-17
mtlD	2897.07	0.638007	0.072199	8.83678	9.85e-19	1.03e-17
nuoE	461.464	0.992967	0.112432	8.83171	1.03e-18	1.08e-17
bglF	973.316	0.737745	0.0835549	8.82947	1.05e-18	1.09e-17
queA	1913.55	-0.644345	0.0731627	-8.80701	1.29e-18	1.33e-17
ydgI	141.581	-1.81133	0.206822	-8.75791	1.99e-18	2.06e-17
yihN	1456.27	0.662136	0.0758158	8.73348	2.47e-18	2.55e-17
uraA	368.529	1.08975	0.124815	8.73087	2.53e-18	2.6e-17
hslU	2827.44	0.626609	0.0720925	8.69174	3.57e-18	3.66e-17
rplI	122.48	1.89183	0.218138	8.67265	4.22e-18	4.32e-17
uhpC	3397.1	0.635755	0.0733086	8.67231	4.23e-18	4.32e-17
yhjV	1311.34	0.670093	0.077418	8.65551	4.91e-18	4.99e-17
rbsD	1471.6	0.653164	0.0756647	8.63235	6.01e-18	6.09e-17
aegA	560.322	-0.896728	0.103897	-8.63093	6.09e-18	6.15e-17
bcsG	1171.45	0.685223	0.0794503	8.62455	6.43e-18	6.49e-17
cbrA	3969.72	0.647188	0.0750824	8.6197	6.71e-18	6.75e-17
rhaS	1013.66	0.710172	0.0825532	8.60259	7.79e-18	7.81e-17
lpp	49.6907	-3.45009	0.402024	-8.58179	9.34e-18	9.34e-17
ybhE	41.5844	-4.81258	0.561533	-8.57042	1.03e-17	1.03e-16
pyrL	1253.7	0.669782	0.0781825	8.56691	1.06e-17	1.06e-16
malP	693.548	0.805558	0.0941794	8.55344	1.19e-17	1.18e-16
yjbC	1431.87	0.648071	0.0760451	8.52219	1.57e-17	1.55e-16
yfeC	345.607	-1.10691	0.130098	-8.50826	1.77e-17	1.74e-16
tldD	1893.34	0.620818	0.072987	8.50586	1.8e-17	1.77e-16
phnE	2240.16	0.612589	0.0720583	8.50129	1.87e-17	1.84e-16
yieN	1289.38	0.659452	0.0776896	8.48829	2.1e-17	2.05e-16
rhtC	1290.11	0.658767	0.0776827	8.48023	2.25e-17	2.19e-16
trpL	133.233	-1.80277	0.212886	-8.46821	2.49e-17	2.42e-16
metR	1699.58	0.625947	0.0739443	8.46512	2.56e-17	2.48e-16
bax	1231.97	0.662646	0.0784894	8.44249	3.11e-17	3e-16
znuB	258.832	-1.26802	0.150393	-8.4314	3.42e-17	3.29e-16
yiiM	1240.99	0.65988	0.07836	8.42114	3.73e-17	3.58e-16
rbsK	1365.09	0.646119	0.0767579	8.41761	3.84e-17	3.68e-16
yihX	1388.91	0.641705	0.0764911	8.38927	4.89e-17	4.68e-16
nrdG	966.877	-0.705346	0.0841569	-8.38133	5.23e-17	4.99e-16
yiiT	1115.58	0.673219	0.0804202	8.37127	5.7e-17	5.41e-16
yjaH	803.192	-0.750054	0.0895986	-8.37128	5.7e-17	5.41e-16
yiaC	1163.18	0.665811	0.0795795	8.36662	5.93e-17	5.61e-16
cdh	1408.64	0.637583	0.0762771	8.35877	6.34e-17	5.98e-16
ugpE	992.583	0.693398	0.0830404	8.35013	6.82e-17	6.41e-16
sgbH	2105.62	0.603431	0.0723168	8.34427	7.17e-17	6.72e-16
entE	566.655	0.85441	0.10248	8.33737	7.6e-17	7.11e-16
alsA	1479.85	0.630081	0.0755808	8.33651	7.65e-17	7.14e-16
pldA	1196.34	0.658487	0.0790277	8.33235	7.93e-17	7.38e-16
lldR	2451.34	0.597902	0.0718561	8.32082	8.74e-17	8.11e-16
rfaL	3206.15	0.605295	0.072813	8.31301	9.33e-17	8.64e-16
dppF	807.761	0.735717	0.0888322	8.28209	1.21e-16	1.12e-15
polB	1243.3	0.647815	0.0783162	8.27178	1.32e-16	1.22e-15
yicO	4453.86	0.634476	0.0767907	8.2624	1.43e-16	1.31e-15
yicL	3070.56	0.598061	0.072509	8.2481	1.61e-16	1.47e-15
rfaK	3603.06	0.609223	0.0738963	8.24431	1.66e-16	1.52e-15
yibH	1625.15	0.613085	0.074414	8.23883	1.74e-16	1.58e-15
ugpC	794.683	0.736096	0.0893521	8.23814	1.75e-16	1.59e-15
nikE	839.033	0.721772	0.0876418	8.23547	1.79e-16	1.62e-15
frwB	1713.09	0.607308	0.0738564	8.22281	1.99e-16	1.8e-15
yiaA	951.841	0.690555	0.084075	8.21355	2.15e-16	1.94e-15
dadX	502.473	-0.893286	0.108967	-8.19776	2.45e-16	2.2e-15
yibN	1624.05	0.609101	0.074421	8.18453	2.73e-16	2.45e-15
yhiR	1233.86	0.641711	0.0784521	8.17966	2.85e-16	2.55e-15
yjbB	1940.41	0.594238	0.0727997	8.16265	3.28e-16	2.93e-15
rarD	948.903	0.686597	0.0841514	8.15907	3.38e-16	3.01e-15
dinF	2255.46	0.587546	0.0720261	8.15741	3.42e-16	3.04e-15
yoaG	1441.55	-0.620812	0.076234	-8.14349	3.84e-16	3.4e-15
yeaX	756.913	-0.744761	0.0915703	-8.13322	4.18e-16	3.7e-15
aldB	1845.77	0.594268	0.0731767	8.12099	4.62e-16	4.08e-15
tyrB	2344.44	0.583901	0.0719176	8.11903	4.7e-16	4.13e-15
pspA	805.444	-0.726111	0.0894568	-8.11689	4.78e-16	4.2e-15
ygdI	1576.77	0.606765	0.0747593	8.11625	4.81e-16	4.21e-15
ycaR	387.321	0.987415	0.12174	8.11086	5.03e-16	4.39e-15
yiaU	1248.1	0.633061	0.0782425	8.09101	5.92e-16	5.15e-15
hokA	1624.21	0.602065	0.0744157	8.09057	5.94e-16	5.16e-15
yicH	6730.42	0.689919	0.0853243	8.08584	6.17e-16	5.35e-15
ilvY	1157.68	0.643953	0.0796574	8.08403	6.27e-16	5.42e-15
yieK	917.894	0.687287	0.085028	8.08306	6.32e-16	5.45e-15
selA	1527.77	0.606459	0.0751516	8.06981	7.04e-16	6.06e-15
yejK	178.027	-1.46065	0.181892	-8.03032	9.72e-16	8.34e-15
dinD	3167.87	0.583423	0.0727188	8.02299	1.03e-15	8.83e-15
pta	32.2773	4.14716	0.517167	8.01899	1.07e-15	9.1e-15
bglB	679.016	0.761141	0.09493	8.01792	1.08e-15	9.16e-15
frvB	990.792	0.665905	0.0830701	8.01618	1.09e-15	9.27e-15
sgbU	947.368	0.67235	0.0841842	7.98665	1.39e-15	1.18e-14
apaG	22764.1	0.968717	0.121322	7.98469	1.41e-15	1.19e-14
rffM	1305.24	0.61794	0.0774632	7.9772	1.5e-15	1.26e-14
speE	38.1328	3.4595	0.433841	7.97412	1.53e-15	1.29e-14
yicI	4723.86	0.620168	0.0777865	7.9727	1.55e-15	1.3e-14
trpC	64.8986	2.43322	0.305495	7.96485	1.65e-15	1.39e-14
cysN	83.7179	-2.17059	0.27298	-7.95149	1.84e-15	1.54e-14
yadE	239.249	-1.2414	0.156156	-7.94973	1.87e-15	1.56e-14
yibG	979.979	0.659942	0.0833245	7.92015	2.37e-15	1.97e-14
glvG	5434.06	0.637337	0.0804743	7.91976	2.38e-15	1.97e-14
yibT	1261.74	0.617928	0.0780399	7.91811	2.41e-15	2e-14
cmr	828.592	-0.699353	0.0885172	-7.90076	2.77e-15	2.29e-14
prlC	1422.22	0.600956	0.0761207	7.89478	2.91e-15	2.4e-14
yjbE	1371.7	0.604367	0.0766605	7.88369	3.18e-15	2.61e-14
ihfA	35.2789	3.6241	0.459874	7.88063	3.26e-15	2.67e-14
ysgA	1404.95	0.599893	0.0763	7.86229	3.77e-15	3.09e-14
yhbH	405.627	-0.942519	0.120168	-7.84338	4.39e-15	3.58e-14
nfi	1030.58	0.644158	0.0821331	7.84286	4.4e-15	3.59e-14
ilvB	3545.5	0.576606	0.0737177	7.82181	5.21e-15	4.23e-14
tag	1309.18	0.603717	0.0774064	7.79932	6.22e-15	5.05e-14
uhpA	3546.75	0.574686	0.0737214	7.79538	6.42e-15	5.19e-14
yagM	637.083	-0.764645	0.0980966	-7.79482	6.45e-15	5.2e-14
yjaB	1958.38	0.563624	0.0727273	7.74982	9.2e-15	7.41e-14
yijE	1964.64	0.562701	0.0727074	7.73925	1e-14	8.03e-14
tiaE	1861.33	0.565485	0.0731002	7.73575	1.03e-14	8.24e-14
yigF	1497.99	0.58313	0.0753969	7.73414	1.04e-14	8.32e-14
cbrC	819.732	0.68237	0.0883215	7.72598	1.11e-14	8.85e-14
ycgF	385.791	-0.950086	0.122979	-7.72562	1.11e-14	8.86e-14
pepE	2619.58	0.555018	0.07187	7.72253	1.14e-14	9.06e-14
feoB	443.622	0.880953	0.114241	7.71135	1.24e-14	9.86e-14
metH	1216.16	0.606051	0.0786952	7.70125	1.35e-14	1.07e-13
aroC	36.2881	3.40337	0.441976	7.70036	1.36e-14	1.07e-13
kdgK	1003.08	0.637133	0.0827588	7.69868	1.37e-14	1.08e-13
xylB	1186.89	0.608113	0.079154	7.68266	1.56e-14	1.22e-13
yrfA	925.076	0.651374	0.0847929	7.68194	1.57e-14	1.23e-13
rfaB	539.84	0.802255	0.104599	7.66983	1.72e-14	1.35e-13
rpoD	54.5854	2.5643	0.335082	7.65275	1.97e-14	1.53e-13
yjbD	1907.57	0.557762	0.0729101	7.64999	2.01e-14	1.56e-13
rhaD	898.508	0.65469	0.0855869	7.64943	2.02e-14	1.57e-13
yhfX	2239.5	0.550958	0.0720405	7.64789	2.04e-14	1.58e-13
yibQ	2048.77	0.550225	0.0724438	7.5952	3.07e-14	2.38e-13
trmH	2455.91	0.545327	0.0718412	7.59073	3.18e-14	2.45e-13
sthA	5273.44	0.605112	0.0798599	7.57717	3.53e-14	2.72e-13
yijP	1278.21	0.589397	0.0778018	7.57562	3.57e-14	2.75e-13
ruvC	60.8688	-2.47284	0.326455	-7.57483	3.6e-14	2.76e-13
yeaW	625.806	-0.746547	0.0987757	-7.558	4.09e-14	3.13e-13
pflD	1500.37	0.568981	0.075369	7.54926	4.38e-14	3.34e-13
zraR	2088.41	0.545605	0.0723409	7.54214	4.62e-14	3.52e-13
yihM	858.068	0.655121	0.0869115	7.5378	4.78e-14	3.63e-13
dppA	1219.04	0.592059	0.0786467	7.52809	5.15e-14	3.9e-13
yhcN	3036.52	0.544857	0.0724285	7.52269	5.37e-14	4.06e-13
yjjY	27.9726	5.69908	0.759169	7.507	6.05e-14	4.57e-13
frwD	1467.63	0.567722	0.0756659	7.50301	6.24e-14	4.7e-13
nikR	765.02	0.678602	0.0905659	7.4929	6.74e-14	5.06e-13
ruvA	71.146	-2.21642	0.296342	-7.47927	7.47e-14	5.61e-13
yieM	870.661	0.645058	0.0864758	7.4594	8.69e-14	6.51e-13
yihU	1395.34	0.568751	0.0763879	7.44556	9.65e-14	7.21e-13
yidL	4973.44	0.586017	0.0787201	7.44432	9.74e-14	7.26e-13
yihL	697.799	0.694672	0.0938302	7.40351	1.33e-13	9.86e-13
yijF	1414.06	0.563841	0.0761875	7.40069	1.35e-13	1.01e-12
lysC	898.96	0.632096	0.0855569	7.38801	1.49e-13	1.1e-12
yhiF	984.737	0.61141	0.0831781	7.35061	1.97e-13	1.46e-12
yidX	513.055	0.785469	0.106928	7.34579	2.05e-13	1.51e-12
pflC	1614.89	0.546678	0.0744615	7.34176	2.11e-13	1.55e-12
yifB	684.219	-0.697702	0.0951519	-7.33251	2.26e-13	1.66e-12
rffT	634.139	0.714864	0.0975555	7.32777	2.34e-13	1.72e-12
pmbA	1133.44	0.585614	0.0800443	7.31612	2.55e-13	1.87e-12
yidQ	4355.23	0.558785	0.0764208	7.31195	2.63e-13	1.92e-12
yhiD	650.792	0.70447	0.0965073	7.29965	2.89e-13	2.1e-12
rfaE	31.4785	7.91977	1.08728	7.284	3.24e-13	2.36e-12
glvB	4249.85	0.551505	0.0760416	7.25267	4.09e-13	2.96e-12
fis	87.3366	-1.90434	0.262751	-7.24769	4.24e-13	3.07e-12
phnN	693.605	0.68121	0.0940453	7.24342	4.38e-13	3.16e-12
zntA	110.245	1.64426	0.227283	7.23443	4.68e-13	3.37e-12
astA	505.816	-0.78392	0.108383	-7.23287	4.73e-13	3.4e-12
yjcR	1492.89	0.544766	0.0754236	7.22276	5.09e-13	3.66e-12
rluB	105.946	-1.70587	0.236643	-7.20863	5.65e-13	4.05e-12
ivbL	5360.19	0.577507	0.0801864	7.20205	5.93e-13	4.24e-12
yliB	698.687	-0.678509	0.0943299	-7.19294	6.34e-13	4.53e-12
yihS	1011.21	0.591024	0.0825349	7.1609	8.02e-13	5.71e-12
yigI	1077.36	0.579	0.0811049	7.1389	9.41e-13	6.69e-12
dctA	364.812	0.889582	0.124959	7.11896	1.09e-12	7.71e-12
alsE	1570.7	0.532302	0.0747824	7.11801	1.09e-12	7.75e-12
yhiL	783.202	0.638523	0.0897451	7.11486	1.12e-12	7.91e-12
hdeB	823.516	0.626784	0.0881345	7.11167	1.15e-12	8.08e-12
yeaP	443.925	-0.815989	0.114963	-7.09783	1.27e-12	8.92e-12
rbn	1829.99	0.519607	0.073222	7.09633	1.28e-12	9e-12
kbaY	589.465	0.712904	0.100584	7.08767	1.36e-12	9.56e-12
nrdD	555.124	-0.736238	0.103928	-7.08413	1.4e-12	9.79e-12
hemX	632.285	0.690335	0.097656	7.06905	1.56e-12	1.09e-11
phnI	1583.11	0.52692	0.0746817	7.05554	1.72e-12	1.2e-11
ydcQ	89.9777	1.77857	0.252075	7.05572	1.72e-12	1.2e-11
ydhD	158.886	1.32978	0.188516	7.05393	1.74e-12	1.21e-11
yfdG	90.7732	-1.80842	0.256514	-7.04999	1.79e-12	1.24e-11
entD	307.585	0.956015	0.135664	7.04693	1.83e-12	1.26e-11
yhfA	1040.37	0.576558	0.0818734	7.04206	1.89e-12	1.31e-11
hslR	879.592	0.606459	0.086152	7.03941	1.93e-12	1.33e-11
alr	1830.15	0.514827	0.0732222	7.03102	2.05e-12	1.41e-11
yahM	464.867	0.784741	0.111721	7.02415	2.15e-12	1.48e-11
yhjR	1224.6	0.551127	0.0785441	7.01679	2.27e-12	1.55e-11
yiiD	726.313	0.6479	0.0923359	7.01677	2.27e-12	1.55e-11
livH	819.26	0.619395	0.0882849	7.01587	2.29e-12	1.56e-11
rmuC	1505.2	0.528057	0.075312	7.0116	2.36e-12	1.6e-11
ygjF	1745.47	0.516319	0.0736406	7.01133	2.36e-12	1.6e-11
hemN	859.752	0.60806	0.0868142	7.00416	2.48e-12	1.68e-11
kefB	1094.9	0.565375	0.0807552	7.00109	2.54e-12	1.72e-11
rluD	346.621	-0.90412	0.129168	-6.99957	2.57e-12	1.73e-11
yjcE	2224.39	0.504282	0.0720534	6.99873	2.58e-12	1.74e-11
frvX	1137.27	0.559495	0.0799656	6.9967	2.62e-12	1.76e-11
dgoT	4714.52	0.543488	0.0777416	6.99096	2.73e-12	1.83e-11
bcsB	946.722	0.587864	0.0841398	6.98675	2.81e-12	1.89e-11
yahJ	734.498	0.640785	0.0919344	6.97002	3.17e-12	2.12e-11
yeeX	68.5125	-2.08294	0.298881	-6.96914	3.19e-12	2.13e-11
phnD	3084.8	0.504304	0.0725205	6.95395	3.55e-12	2.37e-11
yiiU	1179.53	0.550905	0.07924	6.95236	3.59e-12	2.39e-11
yidE	4786.99	0.542276	0.0780127	6.95112	3.62e-12	2.41e-11
yjgF	750.58	0.632284	0.0911744	6.93489	4.07e-12	2.69e-11
yegQ	386.263	-0.847877	0.12259	-6.91637	4.63e-12	3.06e-11
ilvA	1021.38	0.568374	0.0822876	6.90717	4.94e-12	3.26e-11
xylG	1449.9	0.523201	0.0758128	6.90122	5.16e-12	3.4e-11
mprA	1048.53	-0.565973	0.0820413	-6.89864	5.25e-12	3.45e-11
yjcQ	2799.87	0.493964	0.0720268	6.85806	6.98e-12	4.58e-11
hcaT	399.229	-0.826943	0.120681	-6.85233	7.27e-12	4.76e-11
ynfD	308.557	-0.935383	0.136665	-6.84436	7.68e-12	5.02e-11
yiaB	1328.52	0.527829	0.0771338	6.84303	7.75e-12	5.06e-11
yjcF	2851.36	0.492934	0.0720969	6.8371	8.08e-12	5.26e-11
yjdF	482.586	0.750046	0.109829	6.82918	8.54e-12	5.55e-11
yieH	602.295	0.67977	0.0996424	6.8221	8.97e-12	5.82e-11
yhjE	894.375	0.583779	0.085674	6.81396	9.49e-12	6.15e-11
fldB	959.062	0.570919	0.0838046	6.81249	9.59e-12	6.2e-11
dcuD	1752.83	0.500077	0.0735961	6.79488	1.08e-11	7e-11
yiiQ	945.112	0.57171	0.0841793	6.79157	1.11e-11	7.15e-11
narX	272.801	-0.985822	0.145242	-6.78744	1.14e-11	7.34e-11
yidR	5089.33	0.537066	0.0791531	6.78515	1.16e-11	7.44e-11
yiaY	1572.85	0.507133	0.0747534	6.78408	1.17e-11	7.49e-11
upp	209.023	-1.12665	0.166098	-6.78308	1.18e-11	7.52e-11
minE	338.364	-0.88557	0.130562	-6.78275	1.18e-11	7.53e-11
yiaJ	2005.81	0.491294	0.0725539	6.77144	1.28e-11	8.13e-11
argE	1203.39	0.533202	0.0788536	6.76192	1.36e-11	8.66e-11
aphA	830.812	0.593887	0.0878369	6.76125	1.37e-11	8.67e-11
mscL	2223.48	0.487161	0.0720506	6.76137	1.37e-11	8.67e-11
livM	817.961	0.596323	0.088325	6.75147	1.46e-11	9.26e-11
aceA	1813.48	0.493804	0.0732909	6.7376	1.61e-11	1.02e-10
ugpB	1133.75	0.53792	0.0800191	6.7224	1.79e-11	1.13e-10
treF	831.597	0.588224	0.0878056	6.69916	2.1e-11	1.32e-10
yigG	830.525	0.588036	0.0878432	6.69416	2.17e-11	1.36e-10
yrbG	754.165	-0.612232	0.0914738	-6.69298	2.19e-11	1.37e-10
yeaY	1565.19	0.500094	0.0748083	6.68501	2.31e-11	1.45e-10
arsB	943.873	0.561885	0.0842112	6.67233	2.52e-11	1.57e-10
ldcA	96.9857	-1.64213	0.24618	-6.67043	2.55e-11	1.59e-10
rsd	2306.55	0.479765	0.0719329	6.66962	2.56e-11	1.6e-10
ymjA	213.272	-1.0942	0.164336	-6.65831	2.77e-11	1.72e-10
glpK	10012.3	0.63844	0.0959254	6.65559	2.82e-11	1.75e-10
nrfD	3204.33	0.48442	0.0727862	6.65539	2.83e-11	1.75e-10
aceB	1230.13	0.521999	0.0784471	6.65415	2.85e-11	1.76e-10
yiiG	1121.45	0.533929	0.080238	6.65431	2.85e-11	1.76e-10
ydfI	146.427	-1.32068	0.198778	-6.64402	3.05e-11	1.88e-10
uvrB	266.738	-0.97417	0.146808	-6.63566	3.23e-11	1.99e-10
ynfK	252.143	-0.998387	0.150989	-6.6123	3.78e-11	2.32e-10
panC	33.5705	2.85776	0.434718	6.57381	4.9e-11	3.01e-10
yhfG	758.461	0.596853	0.0907978	6.57344	4.92e-11	3.01e-10
argC	1810.2	0.481828	0.0733056	6.57287	4.94e-11	3.01e-10
yhjG	901.888	0.55962	0.0854277	6.5508	5.72e-11	3.49e-10
sspA	853.111	-0.571422	0.0874321	-6.53561	6.34e-11	3.86e-10
yibJ	1151.96	0.520304	0.0796904	6.52907	6.62e-11	4.02e-10
gpt	323.824	0.862013	0.132133	6.52383	6.85e-11	4.16e-10
fhuE	619.321	-0.645906	0.0990176	-6.52315	6.88e-11	4.17e-10
phnB	2986.08	0.471339	0.0723186	6.51753	7.15e-11	4.32e-10
hdfR	114.699	-1.46632	0.22516	-6.51233	7.4e-11	4.47e-10
ytfJ	1005.48	0.537833	0.0826374	6.50835	7.6e-11	4.58e-10
nrfC	2826.78	0.468154	0.0720581	6.4969	8.2e-11	4.93e-10
agaW	878.259	0.559571	0.0861689	6.49389	8.36e-11	5.02e-10
yhjY	961.868	0.543112	0.0837201	6.48723	8.74e-11	5.24e-10
yebZ	548.237	0.672537	0.103737	6.48307	8.99e-11	5.38e-10
prpE	1355.72	0.496076	0.0768007	6.45927	1.05e-10	6.27e-10
yhjA	839.646	0.565193	0.0874976	6.45953	1.05e-10	6.27e-10
phnH	1725	0.47434	0.0737422	6.43242	1.26e-10	7.48e-10
def	2472.33	0.461697	0.0718193	6.4286	1.29e-10	7.65e-10
gmhB	25.583	6.8882	1.0721	6.42493	1.32e-10	7.83e-10
ytfF	1736.03	0.473006	0.0736816	6.4196	1.37e-10	8.09e-10
nrfB	2154.03	0.463298	0.0721728	6.41929	1.37e-10	8.1e-10
brnQ	1117.97	0.514593	0.0802936	6.40889	1.47e-10	8.65e-10
yrfB	927.976	0.542454	0.0846427	6.40876	1.47e-10	8.65e-10
yigE	405.068	0.761463	0.118847	6.4071	1.48e-10	8.73e-10
yihT	1405.03	0.488113	0.0762545	6.4011	1.54e-10	9.06e-10
dnaJ	71.7885	-1.84071	0.288003	-6.39129	1.64e-10	9.64e-10
phnO	2460.78	0.458868	0.071821	6.38904	1.67e-10	9.77e-10
bcsZ	892.442	0.547391	0.0857067	6.38679	1.69e-10	9.9e-10
yeaO	706.396	-0.598715	0.0937901	-6.38357	1.73e-10	1.01e-09
lysA	988.588	-0.530944	0.0833819	-6.36762	1.92e-10	1.12e-09
rhoL	1487.58	0.480223	0.0754497	6.36481	1.96e-10	1.14e-09
hsrA	1136.91	0.508811	0.0799475	6.36431	1.96e-10	1.14e-09
yhhM	903.829	0.542896	0.0853538	6.36054	2.01e-10	1.17e-09
yjdL	1397.59	0.484902	0.0763327	6.35248	2.12e-10	1.23e-09
caiT	1764.44	0.466709	0.0735269	6.34747	2.19e-10	1.26e-09
trmA	2053.81	0.459485	0.072408	6.34578	2.21e-10	1.28e-09
setC	2345.59	0.456063	0.0718863	6.34422	2.24e-10	1.29e-09
yahO	623.548	0.622537	0.0981612	6.34199	2.27e-10	1.3e-09
rfaS	1866.21	0.46263	0.0730509	6.33299	2.4e-10	1.38e-09
gntK	617.422	0.622669	0.0985738	6.31678	2.67e-10	1.53e-09
dhaH	586.098	-0.640124	0.101342	-6.3165	2.68e-10	1.53e-09
gshA	322.379	-0.842014	0.133487	-6.30785	2.83e-10	1.62e-09
ycgJ	607.659	-0.628729	0.0997719	-6.30166	2.94e-10	1.68e-09
hfq	20.7315	6.00207	0.952555	6.30102	2.96e-10	1.68e-09
pgi	58.684	-2.0205	0.320974	-6.29492	3.08e-10	1.75e-09
nrfA	1693.5	0.464079	0.0739253	6.27768	3.44e-10	1.95e-09
htrC	745.59	0.572738	0.0913649	6.26869	3.64e-10	2.06e-09
ybiX	346.509	0.800622	0.127848	6.2623	3.79e-10	2.15e-09
dcuR	855.976	0.543631	0.0869078	6.25526	3.97e-10	2.24e-09
yhjX	1042.28	0.510879	0.0818016	6.24535	4.23e-10	2.38e-09
arsC	670.55	0.593452	0.0952517	6.23036	4.65e-10	2.62e-09
slt	1133.3	0.498377	0.0800095	6.22898	4.69e-10	2.64e-09
yjbM	1259.36	0.485147	0.0780166	6.21851	5.02e-10	2.82e-09
malS	1863.79	0.454245	0.0730596	6.21746	5.05e-10	2.83e-09
yfcX	161.107	-1.17332	0.188723	-6.21715	5.06e-10	2.83e-09
nrfE	1599.04	0.463389	0.0745477	6.21601	5.1e-10	2.85e-09
apaH	561.805	0.637069	0.102598	6.20939	5.32e-10	2.97e-09
hdeD	1113.84	0.498818	0.0803622	6.20712	5.4e-10	3e-09
mntH	447.368	0.703543	0.113562	6.19522	5.82e-10	3.23e-09
kbl	527.027	-0.656775	0.106149	-6.18728	6.12e-10	3.4e-09
thiC	38.2561	2.44371	0.395582	6.1775	6.51e-10	3.61e-09
php	840.018	0.537335	0.0874698	6.14309	8.09e-10	4.48e-09
clpS	785.625	-0.551697	0.0899941	-6.13036	8.77e-10	4.84e-09
ycjP	1061.68	-0.499073	0.0816826	-6.10991	9.97e-10	5.5e-09
recT	41.909	-2.36666	0.387909	-6.10107	1.05e-09	5.8e-09
yhhJ	1311.8	0.470625	0.077317	6.08696	1.15e-09	6.33e-09
prc	14.0207	-7.05007	1.15871	-6.08439	1.17e-09	6.42e-09
yrbC	673.091	0.578325	0.095097	6.08142	1.19e-09	6.53e-09
aaeR	1376.34	0.465242	0.0765558	6.07716	1.22e-09	6.69e-09
yrbF	288.289	0.848718	0.139717	6.07457	1.24e-09	6.79e-09
agaR	526.377	0.641099	0.105566	6.07295	1.26e-09	6.85e-09
yhfT	935.929	0.512347	0.0844076	6.06991	1.28e-09	6.97e-09
acrF	1728.68	0.446661	0.0737156	6.05924	1.37e-09	7.44e-09
ugpQ	599.476	0.604291	0.0997844	6.05597	1.4e-09	7.58e-09
mrcB	44.2849	-2.26773	0.374674	-6.05255	1.43e-09	7.73e-09
yfiQ	400.663	-0.727249	0.1202	-6.05034	1.45e-09	7.82e-09
ycfN	369.819	-0.753939	0.124837	-6.03936	1.55e-09	8.36e-09
mviM	1115.36	-0.486583	0.0806098	-6.03627	1.58e-09	8.51e-09
yhdL	2509.63	0.432769	0.0718121	6.0264	1.68e-09	9.03e-09
rpiB	2444.68	0.432739	0.0718209	6.02525	1.69e-09	9.08e-09
envC	74.999	-1.68121	0.279367	-6.01792	1.77e-09	9.49e-09
aceK	1039.09	0.492576	0.0818578	6.01745	1.77e-09	9.5e-09
yjbJ	2186.65	0.433847	0.0721044	6.01692	1.78e-09	9.52e-09
yjbL	1002.95	0.497403	0.0826754	6.01633	1.78e-09	9.54e-09
dcrB	770.636	0.54245	0.0902263	6.01211	1.83e-09	9.78e-09
flgN	1224.35	-0.473476	0.0787671	-6.01108	1.84e-09	9.82e-09
rhaR	986.912	0.499133	0.0830655	6.00891	1.87e-09	9.94e-09
nikA	844.89	0.52229	0.0872802	5.98406	2.18e-09	1.16e-08
yrfF	1380.65	0.457698	0.0765047	5.98261	2.2e-09	1.17e-08
metA	1891.48	0.435782	0.0729381	5.97468	2.31e-09	1.22e-08
helD	741.549	-0.54929	0.091962	-5.97302	2.33e-09	1.23e-08
slp	807.924	0.529601	0.0886679	5.97286	2.33e-09	1.23e-08
ynbD	90.5084	-1.511	0.252958	-5.97333	2.32e-09	1.23e-08
mdtI	160.598	-1.12658	0.188697	-5.97032	2.37e-09	1.25e-08
yiaT	1080.42	0.48178	0.0809996	5.94793	2.72e-09	1.43e-08
yrfD	1862.12	0.43378	0.0730596	5.93734	2.9e-09	1.52e-08
dadA	528.902	-0.628588	0.105929	-5.93405	2.96e-09	1.55e-08
yiaF	952.085	0.497501	0.0839507	5.9261	3.1e-09	1.62e-08
yjbR	2636.82	0.425682	0.0718569	5.92401	3.14e-09	1.64e-08
yjbA	1740.34	0.435778	0.0736487	5.91697	3.28e-09	1.71e-08
wzxC	431.581	-0.686531	0.116104	-5.91307	3.36e-09	1.75e-08
yhgA	475.615	0.652335	0.110439	5.90676	3.49e-09	1.81e-08
yigA	1395.01	0.450963	0.0763476	5.90671	3.49e-09	1.81e-08
yiaW	733.339	0.542779	0.0919229	5.90472	3.53e-09	1.83e-08
livG	959.49	0.494349	0.0837577	5.90213	3.59e-09	1.86e-08
aroA	44.2302	2.13099	0.361401	5.89648	3.71e-09	1.92e-08
cheB	507.108	-0.634672	0.107935	-5.88014	4.1e-09	2.12e-08
melB	665.233	0.561379	0.095538	5.87597	4.2e-09	2.17e-08
yhdW	2494.03	0.421227	0.0718115	5.86574	4.47e-09	2.3e-08
yjbF	1529.52	0.440325	0.0750761	5.86504	4.49e-09	2.31e-08
yjbH	2045.42	0.424559	0.0724228	5.86224	4.57e-09	2.35e-08
thiG	241.102	0.893668	0.152517	5.85946	4.64e-09	2.38e-08
ulaE	781.979	0.52528	0.0897221	5.85453	4.78e-09	2.45e-08
idnR	1035.36	0.479638	0.0819363	5.85379	4.8e-09	2.46e-08
yfcD	244.657	-0.893325	0.152776	-5.84728	5e-09	2.55e-08
garL	829.625	0.512976	0.0878301	5.84055	5.2e-09	2.65e-08
garP	886.287	0.501551	0.0858796	5.84017	5.21e-09	2.65e-08
lsrF	217.41	-0.946094	0.162092	-5.83679	5.32e-09	2.71e-08
ychQ	282.63	-0.827902	0.14219	-5.82251	5.8e-09	2.94e-08
adiC	701.639	0.544409	0.0935159	5.82157	5.83e-09	2.95e-08
galR	2038.9	-0.422581	0.07259	-5.82147	5.83e-09	2.95e-08
yjgL	1805.12	0.426574	0.0733129	5.81854	5.94e-09	3e-08
ybiS	936.121	-0.49258	0.0847124	-5.81474	6.07e-09	3.07e-08
yahF	516.624	0.618626	0.106419	5.8131	6.13e-09	3.09e-08
livF	684.685	0.548549	0.0944305	5.80902	6.28e-09	3.16e-08
emtA	660.278	-0.558628	0.0962818	-5.80201	6.55e-09	3.29e-08
dgoA	501.338	0.625478	0.107841	5.80002	6.63e-09	3.33e-08
potH	683.79	-0.550443	0.0949241	-5.79877	6.68e-09	3.35e-08
ycgY	983.378	-0.48329	0.0834503	-5.79135	6.98e-09	3.49e-08
yjeT	930.595	0.489372	0.0845421	5.7885	7.1e-09	3.55e-08
dtd	1448.53	0.438542	0.0758011	5.78544	7.23e-09	3.61e-08
mog	548.99	0.599253	0.103607	5.78391	7.3e-09	3.64e-08
yjbQ	2064.51	0.41848	0.0723722	5.78232	7.37e-09	3.67e-08
nikB	1049.42	0.471571	0.0816315	5.77682	7.61e-09	3.78e-08
zwf	29.8379	2.59813	0.450913	5.76193	8.32e-09	4.13e-08
galF	355.194	-0.731807	0.127139	-5.75596	8.61e-09	4.27e-08
ymjB	81.0347	-1.53686	0.267077	-5.75438	8.7e-09	4.3e-08
pepT	555.824	-0.594917	0.103597	-5.74262	9.32e-09	4.61e-08
nemA	129.86	-1.20247	0.209749	-5.73291	9.87e-09	4.87e-08
iclR	967.766	0.477787	0.0835326	5.71976	1.07e-08	5.26e-08
ydiY	676.91	-0.544287	0.0952976	-5.71145	1.12e-08	5.51e-08
proB	1240.2	0.446588	0.0782768	5.70524	1.16e-08	5.71e-08
yedF	357.998	-0.722151	0.126644	-5.70223	1.18e-08	5.8e-08
phnC	1964.78	0.414344	0.0726686	5.70184	1.19e-08	5.81e-08
yajI	649.236	-0.552015	0.0969359	-5.69464	1.24e-08	6.05e-08
flgG	630.7	-0.557824	0.0981133	-5.68551	1.3e-08	6.37e-08
entC	515.16	0.60542	0.106528	5.68323	1.32e-08	6.45e-08
yfeD	1143.77	-0.454406	0.0800705	-5.67508	1.39e-08	6.75e-08
fepG	22.5417	3.04541	0.537013	5.67101	1.42e-08	6.91e-08
frlC	828.105	0.498115	0.0878796	5.66815	1.44e-08	7.01e-08
minD	205.12	-0.944706	0.16672	-5.66642	1.46e-08	7.08e-08
yjbI	1535.15	0.424852	0.0750278	5.66259	1.49e-08	7.23e-08
puuP	385.084	-0.691934	0.122339	-5.65586	1.55e-08	7.5e-08
mdtF	1258.22	0.440996	0.0780171	5.65256	1.58e-08	7.64e-08
yhhX	462.009	0.632253	0.111863	5.65202	1.59e-08	7.65e-08
pitA	711.916	-0.526356	0.0933967	-5.6357	1.74e-08	8.4e-08
hybA	1290.84	0.436497	0.0775763	5.62668	1.84e-08	8.84e-08
ybaX	858.834	-0.490153	0.0871194	-5.62623	1.84e-08	8.85e-08
yaaU	2421.62	0.404037	0.0718253	5.62528	1.85e-08	8.89e-08
phnL	1969.45	0.40863	0.0726503	5.62461	1.86e-08	8.91e-08
yhjB	1127.47	0.45051	0.0800987	5.62443	1.86e-08	8.91e-08
ymgH	621.135	-0.553797	0.0987409	-5.60859	2.04e-08	9.75e-08
ampD	428.214	0.647745	0.115733	5.5969	2.18e-08	1.04e-07
mazG	611.133	-0.556107	0.0994122	-5.59395	2.22e-08	1.06e-07
fre	2959.36	0.403073	0.0722613	5.57799	2.43e-08	1.16e-07
thiH	348.96	0.709319	0.127295	5.57224	2.51e-08	1.19e-07
yidB	664.958	0.532335	0.095534	5.57221	2.52e-08	1.19e-07
basS	585.422	0.560969	0.100743	5.5683	2.57e-08	1.22e-07
arsR	1079.11	0.450692	0.0810118	5.56329	2.65e-08	1.25e-07
yjfC	1490.71	0.419056	0.0754039	5.55748	2.74e-08	1.29e-07
yfaA	626.339	-0.54652	0.0983765	-5.55539	2.77e-08	1.31e-07
ycgL	453.59	-0.629504	0.113422	-5.55009	2.86e-08	1.35e-07
ycjX	362.854	-0.697902	0.125794	-5.54796	2.89e-08	1.36e-07
atpI	899.083	0.473667	0.0854727	5.54173	3e-08	1.41e-07
sohB	263.421	-0.814777	0.147068	-5.54016	3.02e-08	1.42e-07
fixB	2262.92	0.398551	0.0719753	5.53733	3.07e-08	1.44e-07
ytfI	790.458	0.494695	0.0893466	5.53681	3.08e-08	1.44e-07
yghO	211.619	-0.908019	0.164075	-5.53416	3.13e-08	1.46e-07
malK	2300.55	0.397445	0.0719254	5.5258	3.28e-08	1.53e-07
potI	755.592	-0.503481	0.0912436	-5.51799	3.43e-08	1.6e-07
yfeO	679.764	0.522144	0.0946788	5.5149	3.49e-08	1.63e-07
yjfO	446.95	0.625899	0.113518	5.51368	3.51e-08	1.64e-07
cpdB	2022.15	0.399168	0.0724862	5.50682	3.65e-08	1.7e-07
deoB	1620.06	0.409384	0.0743837	5.50368	3.72e-08	1.73e-07
yihQ	883.371	0.472754	0.0859606	5.49966	3.81e-08	1.76e-07
asnA	1065.03	0.446894	0.0812999	5.49686	3.87e-08	1.79e-07
fimA	704.436	0.512056	0.0933458	5.48558	4.12e-08	1.91e-07
phnF	1402.98	0.41805	0.0762556	5.48222	4.2e-08	1.94e-07
malY	219.475	-0.881843	0.161064	-5.47511	4.37e-08	2.02e-07
aroH	32.6037	-2.40806	0.440241	-5.46988	4.5e-08	2.07e-07
nudD	2284.81	-0.393709	0.0720679	-5.46303	4.68e-08	2.15e-07
yjbG	1433.29	0.414837	0.0759471	5.46218	4.7e-08	2.16e-07
yhiJ	792.897	0.487123	0.0892473	5.45812	4.81e-08	2.2e-07
yhjD	691.57	0.513245	0.0940314	5.45823	4.81e-08	2.2e-07
yecO	504.362	-0.589519	0.108094	-5.45378	4.93e-08	2.26e-07
yrbB	1183.95	0.431034	0.0791268	5.44738	5.11e-08	2.34e-07
fecI	1356.04	0.417972	0.076773	5.44425	5.2e-08	2.37e-07
pspE	292.918	-0.758595	0.139507	-5.43769	5.4e-08	2.46e-07
yibK	2712.49	0.390957	0.071913	5.43653	5.43e-08	2.47e-07
deoA	945.279	0.457041	0.0841219	5.43308	5.54e-08	2.52e-07
agaV	725.333	0.501353	0.0922829	5.43278	5.55e-08	2.52e-07
baeR	203.412	-0.907888	0.167263	-5.4279	5.7e-08	2.59e-07
dhaR	548.315	-0.564203	0.10415	-5.4172	6.05e-08	2.74e-07
umuD	413.769	-0.640226	0.11824	-5.41463	6.14e-08	2.78e-07
yhgF	412.407	0.636461	0.117703	5.40736	6.4e-08	2.89e-07
yeaE	297.915	-0.744581	0.138318	-5.38311	7.32e-08	3.3e-07
rob	732.807	-0.496752	0.0923112	-5.38127	7.4e-08	3.33e-07
metC	1273.22	0.418684	0.0778073	5.38104	7.41e-08	3.33e-07
yjjP	887.998	0.461498	0.0858141	5.37788	7.54e-08	3.39e-07
ygiV	300.357	0.735279	0.136779	5.37568	7.63e-08	3.42e-07
malM	2031.89	0.389369	0.0724562	5.37385	7.71e-08	3.45e-07
menA	869.088	0.464236	0.0864264	5.37146	7.81e-08	3.5e-07
thrA	2456.67	0.385429	0.0718108	5.36728	7.99e-08	3.57e-07
arpA	1314.55	0.414337	0.0772677	5.36236	8.21e-08	3.67e-07
bcsC	809.632	0.474562	0.0885788	5.35751	8.44e-08	3.76e-07
bcsF	713.042	0.497574	0.0929022	5.35589	8.51e-08	3.79e-07
cybC	1911.53	0.390145	0.0728543	5.35513	8.55e-08	3.8e-07
yiaH	632.889	0.522031	0.0974832	5.35509	8.55e-08	3.8e-07
yhgG	487.857	0.583986	0.109116	5.35197	8.7e-08	3.86e-07
gntU	685.232	0.504887	0.0943729	5.34991	8.8e-08	3.9e-07
speF	433.486	-0.61909	0.115738	-5.34908	8.84e-08	3.91e-07
ycgV	483.064	-0.589296	0.110172	-5.34889	8.85e-08	3.91e-07
yeaM	308.163	-0.727318	0.136037	-5.34646	8.97e-08	3.96e-07
yqjA	2427	-0.384359	0.0719349	-5.34315	9.13e-08	4.03e-07
fecA	2074.52	0.38522	0.0723406	5.32508	1.01e-07	4.44e-07
yifK	1445.54	0.40352	0.0758243	5.32178	1.03e-07	4.52e-07
yrhB	520.228	0.564313	0.106041	5.32165	1.03e-07	4.52e-07
ycgB	651.152	-0.514911	0.0967659	-5.3212	1.03e-07	4.52e-07
yicS	2307.23	0.382531	0.0719151	5.31921	1.04e-07	4.57e-07
yqiA	1175.06	0.421371	0.0792665	5.31587	1.06e-07	4.64e-07
glpX	959.983	0.444244	0.083724	5.30606	1.12e-07	4.9e-07
yihP	1158.45	0.421497	0.0795457	5.2988	1.17e-07	5.09e-07
dgoK	494.049	0.574684	0.108501	5.29657	1.18e-07	5.14e-07
yhhT	844.082	0.462269	0.0872891	5.29585	1.18e-07	5.16e-07
torZ	712.756	-0.494007	0.0933014	-5.29474	1.19e-07	5.18e-07
ebgC	2284.94	0.38088	0.0719425	5.29423	1.2e-07	5.19e-07
ydeJ	460.899	-0.594939	0.112534	-5.28676	1.25e-07	5.4e-07
kdsD	972.964	0.439303	0.0833889	5.26812	1.38e-07	5.97e-07
kptA	465.569	0.586588	0.11142	5.26465	1.4e-07	6.08e-07
argG	1281.07	0.408854	0.0777013	5.26187	1.43e-07	6.16e-07
rfaZ	538.398	0.5496	0.104453	5.26167	1.43e-07	6.16e-07
dppD	1056.87	0.428419	0.0814614	5.25917	1.45e-07	6.24e-07
wcaD	821.386	-0.463956	0.0884498	-5.24541	1.56e-07	6.71e-07
yhfU	708.304	0.488383	0.0931324	5.24397	1.57e-07	6.76e-07
deaD	210.916	0.851406	0.162739	5.23173	1.68e-07	7.21e-07
ulaD	1819.42	0.383038	0.0732387	5.23	1.7e-07	7.27e-07
nanT	1650.55	0.387782	0.074175	5.22793	1.71e-07	7.35e-07
yjdA	327.565	0.685432	0.13115	5.22632	1.73e-07	7.4e-07
yeaR	318.954	-0.697819	0.133701	-5.21925	1.8e-07	7.68e-07
glnB	387.837	-0.634991	0.121782	-5.21414	1.85e-07	7.87e-07
ydeA	92.264	-1.29545	0.248453	-5.21405	1.85e-07	7.87e-07
yjgZ	1449.09	0.395153	0.0757854	5.21411	1.85e-07	7.87e-07
nikC	880.272	0.448024	0.0860482	5.20667	1.92e-07	8.18e-07
yecD	431.98	-0.603356	0.115886	-5.20644	1.92e-07	8.18e-07
yhdN	1852.91	0.380254	0.0730883	5.20267	1.96e-07	8.34e-07
yoaC	410.381	-0.617004	0.118637	-5.20078	1.98e-07	8.41e-07
yecS	237.555	-0.803307	0.154635	-5.19484	2.05e-07	8.67e-07
yjgB	1153.76	0.41309	0.0796201	5.18827	2.12e-07	8.98e-07
yeaV	295.333	-0.720069	0.138833	-5.1866	2.14e-07	9.04e-07
paaC	235.358	-0.804398	0.155337	-5.17842	2.24e-07	9.44e-07
torY	616.176	-0.512444	0.0989953	-5.17644	2.26e-07	9.52e-07
yhcD	995.783	0.428704	0.0828203	5.17632	2.26e-07	9.52e-07
barA	654.142	-0.499751	0.096564	-5.17533	2.28e-07	9.56e-07
ycbB	734.242	-0.477018	0.0922065	-5.17337	2.3e-07	9.65e-07
yceK	344.93	-0.664865	0.128733	-5.16469	2.41e-07	1.01e-06
acpT	569.336	0.525615	0.10192	5.15713	2.51e-07	1.05e-06
yebO	391.277	-0.624351	0.121268	-5.14853	2.63e-07	1.1e-06
ynfH	351.46	-0.655792	0.127565	-5.14083	2.74e-07	1.14e-06
exo	1911.91	0.374201	0.0728488	5.13668	2.8e-07	1.17e-06
lyxK	1050.97	0.418808	0.0815778	5.13384	2.84e-07	1.18e-06
ycaP	943.64	-0.433511	0.0844395	-5.13398	2.84e-07	1.18e-06
serB	73.1884	1.40932	0.274822	5.12811	2.93e-07	1.22e-06
mdtJ	130.827	-1.06628	0.208004	-5.12624	2.96e-07	1.23e-06
cobS	324.315	-0.679558	0.132602	-5.12477	2.98e-07	1.24e-06
yjfY	1076.71	0.415287	0.0810461	5.12408	2.99e-07	1.24e-06
fimF	641.675	0.496536	0.0969088	5.12374	3e-07	1.24e-06
cspA	1108.33	0.411578	0.080433	5.11703	3.1e-07	1.28e-06
recQ	1253.48	0.399226	0.0780756	5.11332	3.17e-07	1.31e-06
yrbD	831.964	0.448353	0.0877196	5.1112	3.2e-07	1.32e-06
yphH	142.329	-1.01926	0.199463	-5.11003	3.22e-07	1.33e-06
yobB	304.386	-0.697136	0.136735	-5.09844	3.42e-07	1.41e-06
ydiN	356.5	-0.645819	0.126703	-5.09709	3.45e-07	1.42e-06
acs	1660.88	0.377276	0.0741087	5.09085	3.56e-07	1.46e-06
acrE	735.735	0.466402	0.0917694	5.08232	3.73e-07	1.53e-06
mdtE	726.845	0.468456	0.0921962	5.08107	3.75e-07	1.54e-06
hscB	90.5404	1.25446	0.246923	5.08035	3.77e-07	1.54e-06
yciI	193.42	-0.868847	0.171179	-5.07567	3.86e-07	1.58e-06
mdoD	172.879	-0.918301	0.181005	-5.07335	3.91e-07	1.6e-06
ydjH	302.715	-0.695618	0.137124	-5.07291	3.92e-07	1.6e-06
ampG	329.13	0.663187	0.130807	5.06995	3.98e-07	1.62e-06
ymfM	427.992	-0.589601	0.116335	-5.06813	4.02e-07	1.63e-06
pspB	298.816	-0.698848	0.137981	-5.06482	4.09e-07	1.66e-06
copA	1557.72	0.378228	0.0748389	5.0539	4.33e-07	1.76e-06
narH	333.82	-0.65945	0.130735	-5.04417	4.56e-07	1.85e-06
sgcQ	1607.37	0.374807	0.0744672	5.03318	4.82e-07	1.95e-06
yiaG	1124.64	0.402763	0.0801331	5.02617	5e-07	2.02e-06
yhcH	1515.13	0.377816	0.0751852	5.02514	5.03e-07	2.03e-06
wcaC	1760.24	-0.370037	0.073675	-5.02256	5.1e-07	2.06e-06
galU	9.26946	6.14023	1.22284	5.0213	5.13e-07	2.07e-06
tyrR	209.42	-0.825202	0.164553	-5.0148	5.31e-07	2.14e-06
kgtP	927.497	0.423871	0.0846063	5.00991	5.45e-07	2.19e-06
ydfR	64.033	-1.49579	0.298799	-5.00602	5.56e-07	2.23e-06
rffD	916.835	0.424931	0.0849082	5.00459	5.6e-07	2.25e-06
frvA	688.611	0.471124	0.0941712	5.00284	5.65e-07	2.26e-06
ibpA	5649.52	0.406325	0.0812721	4.99957	5.75e-07	2.3e-06
ysdC	756.739	0.452931	0.0907805	4.9893	6.06e-07	2.42e-06
flgF	493.051	-0.544199	0.109121	-4.98712	6.13e-07	2.45e-06
yhcO	2047.04	0.360672	0.0724108	4.98092	6.33e-07	2.52e-06
yjeI	334.513	0.646267	0.129785	4.97953	6.37e-07	2.54e-06
ybjX	623.768	-0.489647	0.098464	-4.97286	6.6e-07	2.63e-06
cycA	1278.01	0.386197	0.077733	4.96825	6.76e-07	2.69e-06
mltD	464.855	0.552874	0.111472	4.95974	7.06e-07	2.8e-06
bioB	13.0414	3.78491	0.763889	4.95479	7.24e-07	2.87e-06
ydcM	133.844	1.00669	0.203254	4.95286	7.31e-07	2.9e-06
frdA	702.892	0.462517	0.093401	4.95195	7.35e-07	2.91e-06
yncA	70.365	-1.40413	0.284324	-4.93849	7.87e-07	3.11e-06
eptA	502.143	0.531738	0.107684	4.93796	7.89e-07	3.12e-06
yihR	636.086	0.479975	0.0972449	4.93573	7.99e-07	3.15e-06
znuA	139.715	-0.992007	0.201055	-4.93401	8.06e-07	3.17e-06
entF	274.021	0.704952	0.142921	4.93245	8.12e-07	3.2e-06
sgcE	1395.54	0.376153	0.0763219	4.92851	8.29e-07	3.26e-06
iadA	253.125	-0.737801	0.149708	-4.92827	8.3e-07	3.26e-06
fkpA	966.975	0.411308	0.0835305	4.92405	8.48e-07	3.32e-06
rtcB	766.657	0.444774	0.0903406	4.9233	8.51e-07	3.33e-06
hokD	155.079	-0.937497	0.190877	-4.91153	9.04e-07	3.54e-06
yhdH	2428.04	0.352365	0.0718169	4.90643	9.27e-07	3.63e-06
yhgE	499.525	0.529279	0.107948	4.90308	9.43e-07	3.68e-06
ynhG	223.146	-0.781133	0.159365	-4.90154	9.51e-07	3.71e-06
nudH	22.5462	-2.63415	0.537497	-4.90077	9.55e-07	3.72e-06
proA	576.395	0.496219	0.101365	4.89536	9.81e-07	3.82e-06
yeaQ	580.125	-0.496909	0.101535	-4.89399	9.88e-07	3.84e-06
yebQ	706.161	-0.457987	0.0935904	-4.89353	9.9e-07	3.85e-06
yjgN	2573.59	0.351326	0.0718144	4.89214	9.97e-07	3.87e-06
ydhV	302.372	-0.66978	0.137107	-4.88509	1.03e-06	4.01e-06
yhaC	515.184	0.519916	0.106455	4.88389	1.04e-06	4.03e-06
ycfT	559.598	-0.502792	0.103135	-4.87509	1.09e-06	4.2e-06
creA	1364.33	0.373584	0.0766667	4.87283	1.1e-06	4.25e-06
lepA	21.2937	2.58841	0.531284	4.872	1.1e-06	4.26e-06
panB	16.0376	3.09462	0.63579	4.86737	1.13e-06	4.36e-06
hscA	102.643	1.12718	0.231695	4.86492	1.15e-06	4.41e-06
hyaF	462.681	-0.545875	0.11225	-4.86304	1.16e-06	4.44e-06
yaiI	634.447	-0.474497	0.0977482	-4.85427	1.21e-06	4.64e-06
ycgK	416.152	-0.57147	0.117785	-4.85179	1.22e-06	4.69e-06
yaeP	577.681	-0.49129	0.1017	-4.83076	1.36e-06	5.21e-06
ldcC	1380.93	0.369232	0.0764829	4.82765	1.38e-06	5.29e-06
cadC	279.142	0.683418	0.141619	4.82574	1.39e-06	5.33e-06
yicG	4179.42	0.365452	0.0757732	4.82297	1.41e-06	5.4e-06
surA	63.174	1.42376	0.295224	4.82263	1.42e-06	5.41e-06
phoH	832.192	-0.424312	0.0880009	-4.82168	1.42e-06	5.43e-06
rof	879.62	0.414109	0.0860515	4.81234	1.49e-06	5.68e-06
clcB	89.9294	-1.20448	0.250643	-4.80555	1.54e-06	5.87e-06
yhiK	596.381	0.479699	0.0999055	4.80153	1.57e-06	5.98e-06
aceF	10.7141	5.61228	1.17098	4.79281	1.64e-06	6.24e-06
sgcR	878.404	0.412344	0.0860982	4.78923	1.67e-06	6.35e-06
hdeA	545.828	0.496351	0.103789	4.78232	1.73e-06	6.56e-06
mobB	2048.16	0.345982	0.0724059	4.77836	1.77e-06	6.68e-06
ychE	311.436	-0.64558	0.135107	-4.77827	1.77e-06	6.68e-06
slyA	142.457	-0.949372	0.198963	-4.7716	1.83e-06	6.9e-06
yliG	841.259	-0.417785	0.0876647	-4.76571	1.88e-06	7.1e-06
yiaV	477.908	0.524377	0.11006	4.76447	1.89e-06	7.13e-06
sgcC	2297.84	0.341305	0.0719216	4.74551	2.08e-06	7.83e-06
bcsA	1202.23	0.373502	0.0788207	4.73864	2.15e-06	8.09e-06
yjgR	1810.69	0.347154	0.0732772	4.73755	2.16e-06	8.12e-06
ydiP	202.208	-0.792016	0.167218	-4.73642	2.18e-06	8.16e-06
yhaH	805.111	0.420156	0.0887307	4.73518	2.19e-06	8.2e-06
cheR	661.047	-0.454407	0.0960929	-4.72884	2.26e-06	8.45e-06
xylH	868.765	0.408455	0.0864161	4.7266	2.28e-06	8.54e-06
sodC	169.301	-0.862559	0.182575	-4.7244	2.31e-06	8.62e-06
ybbO	1160.29	-0.37617	0.0797094	-4.71927	2.37e-06	8.83e-06
rfbD	199.106	-0.794704	0.168513	-4.71599	2.41e-06	8.95e-06
ymfI	333.47	-0.616298	0.130677	-4.71619	2.4e-06	8.95e-06
ypdG	638.029	-0.459291	0.0975093	-4.71023	2.47e-06	9.2e-06
galT	750.172	-0.430378	0.0913939	-4.70905	2.49e-06	9.25e-06
yjhP	1305.6	0.36394	0.0773697	4.70391	2.55e-06	9.47e-06
rrmA	337.995	-0.610727	0.129842	-4.70361	2.56e-06	9.48e-06
yhiN	684.94	0.443464	0.0943476	4.70032	2.6e-06	9.62e-06
thiD	7.85387	5.88872	1.25392	4.69624	2.65e-06	9.8e-06
yebR	383.374	-0.574288	0.122299	-4.69578	2.66e-06	9.81e-06
yeaC	308.46	-0.63728	0.135736	-4.69499	2.67e-06	9.84e-06
yahC	549.86	0.485301	0.10345	4.69117	2.72e-06	1e-05
nrfF	1645.13	0.347419	0.0742071	4.68174	2.84e-06	1.05e-05
yjgW	1516.67	0.351868	0.0751673	4.68113	2.85e-06	1.05e-05
yciU	236.647	-0.723741	0.154642	-4.68012	2.87e-06	1.05e-05
yiiL	355.507	0.589656	0.126027	4.67881	2.89e-06	1.06e-05
lpcA	10.159	5.51164	1.17807	4.67853	2.89e-06	1.06e-05
fecC	450.549	0.528752	0.113025	4.67818	2.89e-06	1.06e-05
kefG	586.729	0.470493	0.100592	4.67726	2.91e-06	1.06e-05
ppiB	400.352	0.557742	0.119246	4.67725	2.91e-06	1.06e-05
yliF	918.21	-0.397688	0.0851279	-4.67166	2.99e-06	1.09e-05
rffG	1560.89	0.349467	0.0748105	4.67136	2.99e-06	1.09e-05
actP	1464.28	0.353024	0.0756335	4.66757	3.05e-06	1.11e-05
ymgB	89.0473	-1.17367	0.251498	-4.66673	3.06e-06	1.11e-05
yncC	254.169	-0.695844	0.14926	-4.66196	3.13e-06	1.14e-05
hflD	150.759	0.890138	0.191501	4.64823	3.35e-06	1.22e-05
ycdM	1090	-0.376465	0.0809963	-4.64792	3.35e-06	1.22e-05
fumB	591.504	0.465044	0.100245	4.63907	3.5e-06	1.27e-05
uxaA	3210.92	0.337588	0.0727856	4.63812	3.52e-06	1.27e-05
yebV	499.037	-0.502961	0.10845	-4.63772	3.52e-06	1.27e-05
yoaB	374.488	-0.572222	0.123641	-4.6281	3.69e-06	1.33e-05
uxuA	673.983	0.439293	0.0949664	4.62577	3.73e-06	1.35e-05
yeaG	485.382	-0.50795	0.109808	-4.62579	3.73e-06	1.35e-05
yhfY	654.199	0.444677	0.0961285	4.62586	3.73e-06	1.35e-05
ycgR	504.972	-0.498249	0.107874	-4.61882	3.86e-06	1.39e-05
yeeO	31.9131	-1.98997	0.430945	-4.61769	3.88e-06	1.4e-05
sgcB	1392.53	0.352169	0.0763503	4.61255	3.98e-06	1.43e-05
racC	25.1219	2.20314	0.47774	4.61159	4e-06	1.43e-05
mtgA	779.297	0.414012	0.0897845	4.61117	4e-06	1.44e-05
feoA	303.447	0.626136	0.135928	4.60638	4.1e-06	1.47e-05
ilvH	2697.15	0.330967	0.0718925	4.60364	4.15e-06	1.49e-05
lipB	14.1374	3.12038	0.677839	4.60342	4.16e-06	1.49e-05
ybjE	956.652	-0.386489	0.0840426	-4.59873	4.25e-06	1.52e-05
yheT	388.285	0.555863	0.120903	4.59759	4.27e-06	1.52e-05
srmB	47.233	-1.59914	0.348116	-4.59369	4.35e-06	1.55e-05
adhP	132.721	-0.944852	0.205848	-4.59004	4.43e-06	1.58e-05
pabA	25.7796	-2.23061	0.486515	-4.58487	4.54e-06	1.62e-05
feaB	327.572	-0.60411	0.131768	-4.58465	4.55e-06	1.62e-05
napB	806.049	-0.407562	0.0889889	-4.57992	4.65e-06	1.65e-05
ycbX	336.381	-0.595431	0.130109	-4.57639	4.73e-06	1.68e-05
ltaE	566.62	-0.469155	0.102525	-4.57601	4.74e-06	1.68e-05
ygiC	1865.21	0.33416	0.0730307	4.57561	4.75e-06	1.68e-05
yjhD	918.204	0.388206	0.0848575	4.5748	4.77e-06	1.69e-05
eutA	1479.7	-0.345251	0.0756505	-4.56377	5.02e-06	1.77e-05
ytfH	1646.76	0.33834	0.0741931	4.56026	5.11e-06	1.8e-05
degQ	2506.68	0.327179	0.0718	4.55682	5.19e-06	1.83e-05
yjhX	1224.12	0.357624	0.0784862	4.55652	5.2e-06	1.83e-05
yihO	1026.45	0.373809	0.0820991	4.55314	5.29e-06	1.86e-05
narV	157.615	-0.859744	0.189003	-4.54883	5.39e-06	1.9e-05
ymbA	692.75	-0.428181	0.0942681	-4.54216	5.57e-06	1.95e-05
gadX	594.06	0.454137	0.100056	4.53882	5.66e-06	1.98e-05
btuE	95.8152	-1.09825	0.242045	-4.53737	5.7e-06	2e-05
dgoD	440.601	0.516916	0.114157	4.5281	5.95e-06	2.08e-05
ybeZ	323.348	-0.59968	0.132594	-4.52268	6.11e-06	2.14e-05
yjjI	640.859	0.437459	0.0969162	4.51378	6.37e-06	2.22e-05
ppiA	337.537	0.581961	0.129141	4.50639	6.59e-06	2.3e-05
ygiT	951.102	0.37805	0.083939	4.50386	6.67e-06	2.33e-05
yhfW	1432.01	0.341754	0.0759417	4.50021	6.79e-06	2.36e-05
ggt	537.94	0.469549	0.104423	4.4966	6.9e-06	2.4e-05
ydgR	132.545	-0.925593	0.205889	-4.4956	6.94e-06	2.41e-05
ydhR	264.571	-0.657072	0.146218	-4.49379	7e-06	2.43e-05
hyfB	826.838	-0.396003	0.0881706	-4.49133	7.08e-06	2.46e-05
ycdO	825.154	-0.396218	0.0882315	-4.49067	7.1e-06	2.46e-05
cspC	944.261	-0.378872	0.0843738	-4.4904	7.11e-06	2.46e-05
ydhO	124.403	-0.953047	0.212447	-4.48605	7.26e-06	2.51e-05
ycaL	1318.32	0.346059	0.0772045	4.48237	7.38e-06	2.55e-05
cvrA	513.358	-0.479737	0.107065	-4.48079	7.44e-06	2.57e-05
flgE	738.924	-0.411121	0.0918934	-4.47389	7.68e-06	2.65e-05
hinT	372.243	-0.554521	0.123963	-4.47327	7.7e-06	2.65e-05
lpxA	145.708	-0.876873	0.196385	-4.46508	8e-06	2.75e-05
ymgG	365.317	-0.558302	0.125038	-4.46505	8.01e-06	2.75e-05
nikD	381.317	0.543781	0.121939	4.45943	8.22e-06	2.82e-05
cysI	30.5004	-1.95492	0.439376	-4.44932	8.61e-06	2.96e-05
artM	784.157	-0.399271	0.0898663	-4.44295	8.87e-06	3.04e-05
fimH	833.257	0.38898	0.0876452	4.43813	9.07e-06	3.11e-05
yecI	203.455	-0.738853	0.166534	-4.43666	9.14e-06	3.13e-05
frlB	548.335	0.457485	0.103558	4.41767	9.98e-06	3.41e-05
intE	229.946	-0.691998	0.156708	-4.41584	1.01e-05	3.44e-05
yhhA	782.146	0.39575	0.0896616	4.41382	1.02e-05	3.47e-05
xapB	930.653	-0.373861	0.0847515	-4.41127	1.03e-05	3.5e-05
yidI	3667.03	0.326487	0.074057	4.40859	1.04e-05	3.54e-05
aaeB	2325.83	0.316867	0.071887	4.40785	1.04e-05	3.55e-05
nanR	1143.2	0.35159	0.0797919	4.40633	1.05e-05	3.57e-05
hemY	702.841	0.411227	0.0933877	4.40344	1.07e-05	3.62e-05
pncA	238.336	-0.677856	0.153963	-4.40272	1.07e-05	3.63e-05
yeaS	555.316	-0.454547	0.103409	-4.39562	1.1e-05	3.74e-05
fdnG	232.336	-0.684732	0.155926	-4.3914	1.13e-05	3.81e-05
dinJ	612.703	0.433587	0.0987413	4.39114	1.13e-05	3.81e-05
glmM	5.78408	-5.77726	1.31634	-4.38887	1.14e-05	3.85e-05
cysQ	4.9448	5.96838	1.36137	4.3841	1.16e-05	3.93e-05
yijD	1907.27	0.318958	0.0728625	4.37753	1.2e-05	4.05e-05
umuC	243.179	-0.665756	0.152394	-4.36864	1.25e-05	4.21e-05
yebN	522.752	-0.462651	0.106175	-4.35744	1.32e-05	4.43e-05
yraJ	591.678	0.436657	0.100227	4.35666	1.32e-05	4.44e-05
fliH	230.341	-0.680376	0.156547	-4.34615	1.39e-05	4.65e-05
idnT	1412.03	0.330941	0.0761434	4.34629	1.38e-05	4.65e-05
ychM	1042.26	-0.356005	0.0819663	-4.34331	1.4e-05	4.71e-05
yggJ	765.904	-0.393584	0.090653	-4.34165	1.41e-05	4.74e-05
tas	1591.56	-0.324368	0.0747161	-4.34134	1.42e-05	4.74e-05
flgI	350.946	-0.552978	0.127422	-4.33975	1.43e-05	4.77e-05
yecM	587.476	-0.437757	0.100907	-4.33822	1.44e-05	4.8e-05
cheY	523.331	-0.458757	0.106121	-4.32296	1.54e-05	5.14e-05
yebB	521.594	-0.458625	0.106274	-4.31549	1.59e-05	5.31e-05
ycfH	825.033	-0.38034	0.0882199	-4.31127	1.62e-05	5.41e-05
lldP	1324.77	0.332069	0.0771226	4.30573	1.66e-05	5.53e-05
puuR	86.0099	-1.09835	0.255086	-4.3058	1.66e-05	5.53e-05
hyfC	1646.09	-0.3197	0.0743277	-4.30123	1.7e-05	5.64e-05
nudC	1897.31	0.312897	0.0728988	4.29221	1.77e-05	5.87e-05
gspG	233.939	0.661724	0.154357	4.28698	1.81e-05	6.01e-05
yfbV	621.008	-0.422148	0.098554	-4.28342	1.84e-05	6.1e-05
glcE	1058.74	0.348483	0.0814031	4.28096	1.86e-05	6.15e-05
hisB	368.829	-0.532704	0.124441	-4.28076	1.86e-05	6.15e-05
ycfR	1973.04	-0.311396	0.0727369	-4.28113	1.86e-05	6.15e-05
msyB	351.211	-0.544778	0.127351	-4.27778	1.89e-05	6.23e-05
yiaM	1234.36	0.334907	0.0783319	4.27549	1.91e-05	6.29e-05
yfaW	323.074	-0.566303	0.13256	-4.27206	1.94e-05	6.38e-05
aidB	977.564	0.35541	0.0832472	4.26933	1.96e-05	6.45e-05
yheS	426.052	0.494485	0.115863	4.26786	1.97e-05	6.49e-05
yjcZ	550.82	0.440838	0.103349	4.26552	1.99e-05	6.55e-05
yrhA	278.127	0.604602	0.141794	4.26395	2.01e-05	6.59e-05
yjdJ	635.402	0.414643	0.0972515	4.26362	2.01e-05	6.59e-05
cmtB	76.2517	-1.15492	0.270923	-4.2629	2.02e-05	6.61e-05
htgA	1144.45	0.339775	0.0797649	4.25971	2.05e-05	6.7e-05
citG	370.236	-0.528885	0.124196	-4.25848	2.06e-05	6.73e-05
yhgN	844.407	0.371023	0.087243	4.25275	2.11e-05	6.9e-05
yceH	997.199	-0.352516	0.0829874	-4.24783	2.16e-05	7.04e-05
rem	291.449	-0.591198	0.139362	-4.24219	2.21e-05	7.22e-05
yegT	753.434	-0.386171	0.0911938	-4.23462	2.29e-05	7.46e-05
ydjK	390.616	-0.512091	0.121146	-4.22706	2.37e-05	7.71e-05
pioO	323.871	0.556336	0.131698	4.22434	2.4e-05	7.79e-05
ymfO	302.365	-0.577668	0.136839	-4.22153	2.43e-05	7.88e-05
yagT	1082.61	0.341258	0.0809118	4.21765	2.47e-05	8.01e-05
aer	1926.77	0.306942	0.0727866	4.21701	2.48e-05	8.03e-05
yodD	234.286	-0.654243	0.155215	-4.21507	2.5e-05	8.09e-05
melA	403.725	0.500229	0.118748	4.21253	2.53e-05	8.17e-05
caiA	2299.85	0.302212	0.071915	4.20235	2.64e-05	8.54e-05
fecB	1433.8	0.318761	0.0759212	4.19858	2.69e-05	8.68e-05
araC	1457.7	0.31776	0.0756926	4.19803	2.69e-05	8.69e-05
nanA	1437.61	0.318424	0.0758844	4.19618	2.71e-05	8.75e-05
ycjD	728.201	-0.387523	0.0923889	-4.19447	2.74e-05	8.81e-05
yahI	450.637	0.473717	0.11296	4.19366	2.74e-05	8.83e-05
btuB	2764.04	0.30175	0.0719604	4.19328	2.75e-05	8.84e-05
ymfN	453.478	-0.47388	0.113129	-4.18884	2.8e-05	9.01e-05
relE	122.758	-0.893041	0.213464	-4.18357	2.87e-05	9.21e-05
flgD	767.169	-0.378861	0.0905773	-4.18273	2.88e-05	9.24e-05
yajL	908.007	-0.357145	0.08539	-4.18251	2.88e-05	9.24e-05
glcF	868.296	0.361351	0.0864147	4.18159	2.89e-05	9.27e-05
ydaL	100.207	-0.987188	0.236102	-4.1812	2.9e-05	9.27e-05
agaD	706.591	0.389456	0.0931773	4.17973	2.92e-05	9.33e-05
rihB	107.203	-0.954013	0.22837	-4.17748	2.95e-05	9.41e-05
tehA	178.93	-0.739565	0.177185	-4.17397	2.99e-05	9.55e-05
cysJ	21.0123	-2.24325	0.537528	-4.17326	3e-05	9.57e-05
ydcC	115.97	-0.915565	0.219629	-4.16869	3.06e-05	9.75e-05
hslJ	169.538	-0.758644	0.182009	-4.16816	3.07e-05	9.77e-05
rph	993.654	-0.346056	0.0830687	-4.1659	3.1e-05	9.86e-05
flgC	629.052	-0.408108	0.0979984	-4.16444	3.12e-05	9.91e-05
wcaB	373.619	-0.514896	0.123649	-4.16418	3.12e-05	9.91e-05
ytfB	726.734	0.383706	0.0921613	4.16342	3.14e-05	9.94e-05
ydhZ	278.87	-0.59235	0.142366	-4.16075	3.17e-05	0.000100442
fixA	1047.68	0.339423	0.0816293	4.1581	3.21e-05	0.000101525
manY	65.8707	-1.21	0.291291	-4.15391	3.27e-05	0.000103307
kdgR	321.695	-0.551389	0.132791	-4.15229	3.29e-05	0.000103935
oppD	402.588	-0.495855	0.119425	-4.15203	3.3e-05	0.000103935
paaB	193.437	-0.708126	0.170554	-4.15191	3.3e-05	0.000103935
ybgF	322.974	-0.550186	0.132544	-4.15096	3.31e-05	0.000104275
dgoR	513.238	0.442409	0.106587	4.15069	3.31e-05	0.000104303
erfK	231.009	-0.647298	0.156219	-4.14354	3.42e-05	0.000107514
hyfG	1040	-0.339236	0.0819994	-4.13706	3.52e-05	0.000110499
yebU	284.017	-0.583188	0.141091	-4.13341	3.57e-05	0.000112169
gadW	714.13	0.382575	0.0927866	4.12317	3.74e-05	0.00011717
yliD	444.141	-0.470779	0.114194	-4.12264	3.75e-05	0.000117335
yeaI	121.113	-0.885497	0.214808	-4.12227	3.75e-05	0.000117419
glpG	2043.77	-0.298783	0.0725166	-4.1202	3.79e-05	0.000118373
yhfS	544.341	0.427774	0.103873	4.11826	3.82e-05	0.000119268
yraK	1003.8	0.34005	0.0826083	4.11642	3.85e-05	0.000120118
dcuB	740.065	0.376716	0.0915219	4.11613	3.85e-05	0.000120164
yjeO	607.463	0.407817	0.0990978	4.1153	3.87e-05	0.00012049
ptsI	4.24804	5.76077	1.40365	4.10413	4.06e-05	0.000126297
yneG	110.811	-0.921259	0.224477	-4.10402	4.06e-05	0.000126297
mpl	1215.99	0.322562	0.0786026	4.10372	4.07e-05	0.000126352
malQ	715.157	0.380242	0.0927273	4.10065	4.12e-05	0.000127927
miaB	262.352	-0.601368	0.146678	-4.09991	4.13e-05	0.000128219
glcB	650.906	0.394655	0.0962906	4.09858	4.16e-05	0.000128847
uxaC	2634.64	0.294343	0.0718412	4.09714	4.18e-05	0.000129538
recD	1200.06	0.322997	0.0788444	4.09664	4.19e-05	0.000129701
ygjM	1675.39	0.303139	0.0740059	4.09615	4.2e-05	0.000129865
yhcM	2105.34	0.295923	0.0722555	4.09551	4.21e-05	0.00013011
ygjE	2880.87	0.294951	0.0721193	4.08977	4.32e-05	0.000133254
intB	995.536	0.338449	0.0828026	4.08742	4.36e-05	0.00013449
rffA	205.661	0.6718	0.164367	4.08718	4.37e-05	0.00013451
ynfM	94.9452	-0.990459	0.242433	-4.08549	4.4e-05	0.000135375
proP	543.934	0.424347	0.103905	4.084	4.43e-05	0.000136127
ydjN	136.805	-0.825123	0.202212	-4.08049	4.49e-05	0.000138079
hybD	888.985	0.349133	0.085742	4.0719	4.66e-05	0.000143148
ydjJ	428.274	-0.47164	0.11608	-4.06306	4.84e-05	0.000148549
gatY	644.319	-0.393148	0.0970187	-4.05229	5.07e-05	0.000155423
tynA	263.212	-0.592172	0.146443	-4.0437	5.26e-05	0.000161097
sucD	326.214	0.530139	0.131216	4.0402	5.34e-05	0.000163376
fixX	1452.85	0.305879	0.0757373	4.03868	5.38e-05	0.000164294
ycfL	482.434	-0.443818	0.109991	-4.03504	5.46e-05	0.000166716
fecE	1178.84	0.31944	0.0791862	4.03403	5.48e-05	0.000167287
ppk	4.10024	5.70298	1.41418	4.03273	5.51e-05	0.000168076
ygiE	2055.03	0.291522	0.0723808	4.02762	5.63e-05	0.000171622
yfgO	222.502	-0.640553	0.159079	-4.02662	5.66e-05	0.000172197
gntR	235.292	0.618566	0.153815	4.0215	5.78e-05	0.000175833
fhiA	2107.03	0.290396	0.0722516	4.01923	5.84e-05	0.000177385
yfbQ	842.611	-0.351567	0.0875466	-4.01576	5.93e-05	0.000179857
gdhA	278.242	-0.571922	0.142459	-4.01464	5.95e-05	0.000180557
yeeJ	228.971	-0.629459	0.156862	-4.01282	6e-05	0.0001818
maoC	203.871	-0.665826	0.166085	-4.00896	6.1e-05	0.000184643
pinQ	33.3436	-1.65739	0.413462	-4.00856	6.11e-05	0.000184728
yhiP	1486.15	0.302337	0.0754252	4.00844	6.11e-05	0.000184728
epd	66.6632	-1.15841	0.289084	-4.00717	6.14e-05	0.000185562
ytfE	1022.68	0.329005	0.0821739	4.00376	6.23e-05	0.0001881
manA	241.995	-0.610497	0.152613	-4.00029	6.33e-05	0.000190632
shiA	161.526	-0.744935	0.186225	-4.00019	6.33e-05	0.000190632
yjfF	1226.58	0.313689	0.0784394	3.99913	6.36e-05	0.000191328
gatC	578.858	-0.405613	0.101507	-3.99592	6.44e-05	0.000193773
yrdA	998.207	0.330351	0.0827341	3.99292	6.53e-05	0.00019607
dedA	190.327	-0.685886	0.171812	-3.99207	6.55e-05	0.00019661
ydiB	128.908	-0.830804	0.208131	-3.99173	6.56e-05	0.000196723
ogrK	748.733	-0.364306	0.0913913	-3.98623	6.71e-05	0.000201168
yghU	742.429	0.364176	0.0914069	3.98412	6.77e-05	0.000202786
paaJ	227.14	-0.627199	0.157449	-3.98351	6.79e-05	0.00020314
tfaE	477.253	-0.439847	0.110514	-3.98002	6.89e-05	0.00020597
ligT	1720.81	0.292761	0.0737339	3.9705	7.17e-05	0.000214189
gntT	683.629	0.374429	0.0943976	3.96651	7.29e-05	0.000217622
ygeD	2637.3	0.284946	0.0718419	3.9663	7.3e-05	0.000217632
yjeH	1136.72	0.316861	0.0798964	3.96589	7.31e-05	0.000217816
glvC	2473.36	0.284518	0.0717984	3.96273	7.41e-05	0.000220534
ompF	446.641	0.4493	0.113408	3.96179	7.44e-05	0.000221222
idnD	846.567	0.344941	0.0871567	3.95771	7.57e-05	0.000224846
exoX	270.189	-0.571461	0.144524	-3.95409	7.68e-05	0.000228078
ycfJ	172.565	-0.712391	0.18026	-3.95201	7.75e-05	0.000229881
ccmD	356.98	-0.498557	0.126283	-3.94792	7.88e-05	0.000233644
rhtA	561.873	-0.405597	0.102819	-3.94477	7.99e-05	0.000236537
yhbP	386.866	0.477036	0.121062	3.94044	8.13e-05	0.000240649
uxuR	414.118	0.462046	0.117335	3.93785	8.22e-05	0.000243057
amiB	448.63	-0.44682	0.113635	-3.93207	8.42e-05	0.000248768
yegU	236.234	-0.606807	0.154408	-3.92989	8.5e-05	0.00025082
nanE	1239.35	0.307046	0.0782571	3.92355	8.73e-05	0.0002573
ycgH	201.425	-0.653642	0.167045	-3.91298	9.12e-05	0.000268611
dbpA	129.57	-0.810689	0.207507	-3.90681	9.35e-05	0.000275099
yiiF	234.104	0.60243	0.154193	3.90697	9.35e-05	0.000275099
ygaZ	453.603	-0.441719	0.113075	-3.90642	9.37e-05	0.000275311
yjfM	806.105	0.346274	0.0886693	3.90522	9.41e-05	0.000276444
yhhY	401.226	0.464408	0.119041	3.90125	9.57e-05	0.000280787
gabT	1004.77	-0.322827	0.0827801	-3.89981	9.63e-05	0.000282225
ymfG	465.997	-0.43536	0.11171	-3.89723	9.73e-05	0.000285012
marA	55.8815	-1.22905	0.31565	-3.89373	9.87e-05	0.000288918
hybF	342.063	-0.501274	0.128877	-3.88956	0.000100427	0.000293683
mgsA	641.75	-0.377105	0.0971589	-3.88132	0.000103889	0.000303556
yhbX	1183.27	0.30701	0.0791065	3.88097	0.000104039	0.000303743
ydiR	203.958	-0.644257	0.166014	-3.88073	0.000104142	0.000303791
yciV	614.547	-0.382934	0.0989299	-3.87076	0.000108497	0.000316233
ynjI	144.584	-0.760382	0.196516	-3.86932	0.000109141	0.000317847
ydfT	151.993	-0.741821	0.191786	-3.86797	0.000109747	0.000319347
yhjH	567.228	0.394552	0.102021	3.86736	0.000110019	0.000319875
mcrC	507.626	0.414026	0.107099	3.86581	0.000110722	0.000321651
nrdF	479.473	-0.426194	0.11027	-3.865	0.000111087	0.000322446
cmk	3.72875	5.56304	1.44306	3.85502	0.000115718	0.000335611
ybhO	256.667	-0.570362	0.148172	-3.84933	0.000118443	0.000343231
zraP	3349.73	0.281232	0.0731346	3.8454	0.000120354	0.000348482
ylbF	260.706	-0.564201	0.147017	-3.83765	0.000124219	0.000359377
oppC	174.297	-0.68724	0.179263	-3.83371	0.000126227	0.000364705
zntR	355.747	0.482667	0.125904	3.83363	0.000126268	0.000364705
thiF	186.567	0.660417	0.172302	3.8329	0.000126643	0.00036549
exuT	931.899	0.323508	0.0844499	3.83077	0.000127743	0.000368361
cedA	88.7035	-0.958163	0.25021	-3.82943	0.000128439	0.000370065
creB	1462.76	0.289482	0.0756403	3.82709	0.000129666	0.000373294
hycA	461.302	0.426902	0.111755	3.81998	0.000133461	0.000383809
yedJ	224.275	-0.604944	0.158369	-3.81984	0.000133537	0.000383809
paaI	240.147	-0.583973	0.153116	-3.81392	0.000136781	0.000392813
ygbE	328.036	-0.501225	0.131454	-3.81293	0.000137329	0.000394066
fliQ	193.617	-0.64893	0.170233	-3.81201	0.000137841	0.000395213
ycdR	57.4007	-1.18491	0.311069	-3.80917	0.000139432	0.000399447
ydcS	122.164	-0.813022	0.213552	-3.80713	0.000140587	0.000402429
pqqL	210.511	-0.621798	0.163382	-3.80579	0.000141353	0.000404292
ycfZ	525.824	-0.402679	0.105832	-3.8049	0.000141861	0.000405415
kbaZ	562.294	0.389196	0.102402	3.80068	0.0001443	0.000412053
ruvB	22.1341	-1.95121	0.513491	-3.7999	0.000144756	0.000412886
yniC	173.307	-0.683064	0.179764	-3.79978	0.000144827	0.000412886
dinB	880.542	0.32656	0.0860025	3.7971	0.000146398	0.000417027
smg	4213.4	0.288091	0.0758896	3.79618	0.000146942	0.000418239
ytfA	539.893	0.395433	0.10421	3.79457	0.000147901	0.000420627
hisI	334.292	-0.493395	0.130252	-3.78801	0.000151856	0.000431528
sdaB	1711.12	-0.279902	0.0739046	-3.78733	0.000152273	0.000432361
idnO	1020.23	0.311373	0.0822258	3.7868	0.000152599	0.000432939
yeaB	214.465	-0.612732	0.161897	-3.7847	0.000153895	0.000436263
yoaF	351.894	-0.480946	0.127101	-3.78397	0.000154349	0.000437198
ydcX	121.769	-0.808913	0.213835	-3.78288	0.000155026	0.000438762
glgS	1023.9	0.310699	0.0821436	3.78239	0.00015533	0.000439269
bcsE	468.23	0.419726	0.111013	3.78086	0.000156288	0.000441623
rumB	468.464	-0.421151	0.11141	-3.78021	0.000156697	0.000442424
creD	1352.43	0.290234	0.0767913	3.77951	0.000157137	0.000442955
ttdA	1319.43	0.291729	0.0771847	3.77962	0.000157065	0.000442955
rbbA	1167.27	0.299854	0.0793675	3.77804	0.000158067	0.000445093
yghY	1574.68	0.282189	0.0746944	3.77791	0.000158149	0.000445093
relA	25.6713	-1.78639	0.473052	-3.77631	0.000159166	0.000447599
ymgD	496.958	-0.409395	0.108499	-3.77327	0.000161121	0.000452733
msrA	1160.82	0.299576	0.079479	3.76924	0.000163743	0.000459735
hyfE	886.824	-0.324172	0.0860229	-3.76844	0.000164269	0.000460844
ulaF	902.119	0.321467	0.0853335	3.76719	0.000165098	0.0004628
csgB	303.951	-0.513073	0.136382	-3.76203	0.000168536	0.000472063
yjfL	763.368	0.340093	0.0904476	3.76011	0.000169841	0.000475338
aroL	617.82	0.369745	0.0983807	3.75831	0.000171063	0.000478377
ydjA	96.4553	-0.901444	0.240012	-3.75584	0.000172764	0.000482751
yceA	285.93	-0.52746	0.140457	-3.75531	0.000173124	0.000483373
nupG	573.003	0.381149	0.101573	3.75245	0.000175117	0.000488549
fbp	764.606	0.339086	0.0903962	3.75111	0.000176054	0.000490385
yhhW	647.739	0.361887	0.096474	3.75114	0.000176032	0.000490385
yeaD	275.119	-0.536765	0.143174	-3.74904	0.000177511	0.000494053
hisH	369.534	-0.465471	0.124173	-3.74858	0.00017784	0.000494577
yciC	114.001	-0.82748	0.220846	-3.74686	0.000179059	0.000497575
yhdT	1301.9	0.289982	0.0774062	3.74624	0.000179506	0.000498423
ytjB	430.649	0.431764	0.115266	3.7458	0.000179818	0.000498897
prpR	337.486	0.48333	0.129063	3.7449	0.000180464	0.000500294
yjhH	995.277	0.309817	0.0828034	3.74159	0.000182856	0.000506526
yraL	116.437	-0.817579	0.218606	-3.73997	0.000184042	0.00050941
ygiL	710.704	0.347419	0.0929443	3.73793	0.000185543	0.00051316
ydiD	104.933	-0.858716	0.230127	-3.73149	0.000190353	0.00052605
gadE	826.364	0.327488	0.0878802	3.72653	0.000194133	0.000536076
flgK	297.975	-0.511533	0.137686	-3.71521	0.000203037	0.000560222
rimJ	285.578	-0.521774	0.140577	-3.71167	0.000205898	0.000567672
ymfB	499.495	-0.401793	0.108263	-3.71127	0.000206225	0.000568128
abgR	232.092	-0.57755	0.155694	-3.70953	0.000207645	0.000571528
ybiV	959.687	-0.311203	0.0838966	-3.70936	0.000207784	0.000571528
ddpB	95.8145	-0.892385	0.240665	-3.708	0.000208904	0.00057416
yfaX	610.59	-0.367577	0.0991884	-3.70585	0.000210684	0.000578601
ydhF	136.932	-0.747114	0.201754	-3.7031	0.000212983	0.000584456
yzgL	495.358	0.40054	0.108258	3.69986	0.000215721	0.000591509
slyB	112.027	-0.821998	0.222693	-3.69116	0.00022323	0.000611623
ssuE	392.589	-0.445338	0.1207	-3.68961	0.000224596	0.000614887
smf	4782.99	0.286899	0.0779795	3.67916	0.000234002	0.000640139
htpG	1746.43	-0.27103	0.0737028	-3.67734	0.000235679	0.000644225
flhA	419.172	-0.430053	0.117129	-3.67162	0.000241021	0.000658318
torA	1257.68	-0.286479	0.0781441	-3.66604	0.000246339	0.00067232
soxS	1610.07	0.272263	0.0744355	3.6577	0.000254491	0.00069403
aaeX	792.395	0.325863	0.0892098	3.65278	0.000259421	0.000706928
prkB	570.486	0.371407	0.101765	3.64966	0.00026259	0.000715008
glpA	388.035	-0.442276	0.121368	-3.64409	0.000268335	0.000730088
yegD	537.35	-0.381713	0.104788	-3.64272	0.000269777	0.000733444
ycdB	813.695	-0.322643	0.0885974	-3.64167	0.00027087	0.000735846
chbC	263.69	-0.531912	0.14613	-3.63999	0.000272646	0.0007401
pin	358.642	-0.458251	0.12593	-3.63894	0.000273759	0.000742009
ydhP	226.457	-0.573345	0.157559	-3.63893	0.000273771	0.000742009
ycjT	98.0947	-0.865152	0.237777	-3.6385	0.000274225	0.000742667
yebE	675.5	-0.345778	0.0951149	-3.63537	0.000277581	0.000751177
yfaV	926.042	-0.308107	0.0848174	-3.63259	0.000280588	0.000758732
malT	735.742	0.332935	0.0917111	3.63025	0.000283144	0.000764465
paaG	78.1548	-0.96563	0.26601	-3.63006	0.000283361	0.000764465
yhdX	1033.86	0.297378	0.081921	3.63006	0.000283356	0.000764465
plsB	79.7538	0.946757	0.260828	3.62982	0.00028362	0.000764578
hisA	255.186	-0.538682	0.14851	-3.62724	0.000286465	0.000771657
yedD	139.085	-0.725148	0.200152	-3.62298	0.000291231	0.000783894
yhhN	596.514	0.361644	0.0998425	3.62214	0.000292172	0.000785827
eco	407.763	-0.429589	0.11863	-3.62125	0.000293179	0.000787933
yacH	624.518	0.354662	0.0979485	3.6209	0.000293578	0.000788402
ynfP	51.6868	-1.1835	0.327187	-3.61721	0.000297795	0.000799117
ydbH	96.508	-0.865886	0.239632	-3.6134	0.000302207	0.000810339
ygjN	1614.59	0.268703	0.0744036	3.61143	0.000304513	0.0008159
yeaT	176.791	-0.641944	0.177861	-3.60925	0.00030708	0.000822151
appB	205.079	-0.5968	0.165416	-3.60786	0.000308729	0.000825939
yncN	62.4587	-1.07252	0.297324	-3.60725	0.000309458	0.00082726
appA	255.874	-0.534654	0.148301	-3.60521	0.000311905	0.000833167
yjjK	800.268	0.320426	0.0888871	3.60486	0.000312318	0.000833639
sufB	349.184	0.457278	0.126968	3.60151	0.000316371	0.000843815
fumA	176.317	-0.641183	0.178121	-3.5997	0.000318579	0.000849061
rihC	2370.34	0.258263	0.0718437	3.59479	0.000324657	0.000864604
katE	68.6127	-1.01958	0.283714	-3.5937	0.000326015	0.000867564
gapA	348.023	-0.458444	0.127706	-3.58984	0.000330884	0.000879857
yaeR	591.996	0.359288	0.100161	3.58711	0.000334365	0.00088844
manZ	582.35	-0.362603	0.101186	-3.58352	0.000338996	0.000900067
yncH	41.3947	-1.31278	0.366438	-3.58254	0.000340266	0.000902757
nac	309.068	-0.484074	0.135226	-3.57974	0.00034393	0.00091179
ydjG	238.613	-0.549246	0.153501	-3.57812	0.00034608	0.000916798
frlA	587.634	0.359215	0.100482	3.57491	0.000350348	0.000927407
fimC	537.813	0.37314	0.104398	3.57421	0.000351285	0.000929189
bcr	268.622	-0.517507	0.144807	-3.57376	0.000351891	0.000930093
glpT	989.968	-0.296259	0.0831183	-3.56431	0.00036482	0.000963541
hofC	541.82	0.3708	0.104054	3.56353	0.000365906	0.000965685
ydcU	93.5045	-0.867034	0.243366	-3.56267	0.000367096	0.000968098
ydiK	237.776	-0.547462	0.153759	-3.56052	0.000370123	0.00097535
mtr	827.628	0.31222	0.0878354	3.5546	0.000378553	0.000996819
ydfH	152.625	-0.678898	0.191145	-3.55175	0.000382678	0.00100693
yfaD	269.836	-0.51178	0.144476	-3.54233	0.000396614	0.00104282
gspC	279.141	0.500788	0.141418	3.54118	0.000398335	0.00104656
ydeS	22.3104	-1.79097	0.506151	-3.5384	0.000402557	0.00105686
zupT	1808.25	0.258807	0.0732804	3.53173	0.000412849	0.00108307
yeaH	249.83	-0.528906	0.150038	-3.52514	0.000423254	0.00110954
sufE	252.128	0.52349	0.14863	3.52212	0.000428118	0.00112146
ymfC	1554.03	-0.263912	0.0749707	-3.52021	0.000431208	0.00112871
gspH	322.409	0.463786	0.131889	3.51648	0.000437308	0.00114383
xdhA	1635.93	0.261067	0.0742583	3.51566	0.000438659	0.00114651
lrp	25.7236	-1.64804	0.468906	-3.51464	0.000440346	0.00114964
ydiE	84.3835	-0.899598	0.255965	-3.51454	0.00044051	0.00114964
yjfJ	619.753	0.345179	0.0982479	3.51335	0.000442496	0.00115397
stpA	607.275	-0.349165	0.0993937	-3.51295	0.000443155	0.00115483
potG	683.777	-0.332438	0.0946471	-3.5124	0.000444086	0.0011564
lon	392.271	0.42234	0.120259	3.51192	0.000444888	0.00115763
ybjD	580.604	-0.355477	0.101305	-3.50898	0.000449836	0.00116964
bdm	147.138	-0.682702	0.194577	-3.50864	0.000450405	0.00117025
idnK	1173.31	0.278032	0.0792713	3.50735	0.000452597	0.00117508
gnd	132.395	0.713157	0.203406	3.50608	0.000454755	0.00117982
rfbC	86.8862	-0.883845	0.252218	-3.50429	0.000457823	0.0011869
yfaQ	491.849	-0.381726	0.108969	-3.50307	0.000459934	0.00119149
ydfX	59.0742	-1.07026	0.305584	-3.50235	0.000461169	0.00119381
ychJ	91.9536	-0.858459	0.245285	-3.49985	0.000465526	0.00120421
rfbX	90.2901	-0.865977	0.24745	-3.49961	0.000465945	0.00120441
ynjE	173.598	-0.627688	0.179381	-3.49918	0.000466691	0.00120545
pfkB	152.858	-0.667076	0.190972	-3.49306	0.000477513	0.00123249
artQ	607.036	-0.347158	0.0994071	-3.49229	0.000478897	0.00123516
yciT	302.551	-0.476714	0.136602	-3.4898	0.000483374	0.00124579
ybjQ	657.882	-0.33545	0.0961304	-3.48953	0.000483872	0.00124617
ybdJ	559.56	-0.358897	0.102937	-3.48657	0.000489264	0.00125872
ygjR	2029.36	0.252596	0.0724505	3.48646	0.000489463	0.00125872
ygaH	310.568	-0.469834	0.134863	-3.48379	0.000494363	0.00126947
ykfF	1044.24	0.284621	0.0816963	3.48389	0.000494184	0.00126947
ycjM	161.654	-0.647176	0.185792	-3.48334	0.000495207	0.00127071
leuA	2327.5	0.250299	0.0718817	3.48209	0.000497509	0.00127568
yhfK	526.02	0.366961	0.105407	3.48139	0.000498825	0.00127812
asr	155.137	-0.658573	0.189565	-3.47413	0.00051251	0.00131223
ssuC	398.935	-0.415799	0.11976	-3.47192	0.000516754	0.00132214
ygeW	1100.16	0.278871	0.0805603	3.46164	0.000536893	0.00137267
yhbC	3.4515	-5.05256	1.45984	-3.46105	0.000538073	0.00137397
yheU	511.506	0.369322	0.10671	3.46099	0.000538183	0.00137397
tbpA	1326.43	0.266695	0.0770987	3.45913	0.000541916	0.0013825
yhhF	952.545	0.290025	0.0838823	3.45753	0.000545153	0.00138974
nhoA	135.845	-0.699124	0.202248	-3.45677	0.000546687	0.00139265
yjhQ	1481.17	0.260649	0.0754672	3.4538	0.00055275	0.00140707
ygeX	2054.21	0.249792	0.0723803	3.4511	0.00055831	0.0014202
ccmA	427.253	-0.399705	0.116079	-3.44339	0.000574477	0.00145921
yfaO	570.845	-0.351362	0.102039	-3.4434	0.000574445	0.00145921
dmsB	1367.28	-0.264229	0.0767499	-3.44272	0.000575886	0.00146174
ccmE	379.309	-0.421969	0.122619	-3.4413	0.000578933	0.00146841
ynaK	38.3137	-1.30704	0.379971	-3.43984	0.00058206	0.00147528
pphA	320.684	-0.456662	0.132798	-3.43878	0.000584333	0.00147997
rtcA	548.896	0.355323	0.103464	3.43425	0.000594201	0.00150388
yceD	14.3018	-2.21732	0.645814	-3.43338	0.000596113	0.00150764
yfaY	370.798	-0.425319	0.123931	-3.43191	0.000599341	0.00151471
sapA	182.963	-0.599768	0.174808	-3.43101	0.000601337	0.00151867
yfbJ	279.679	-0.486706	0.141907	-3.42976	0.000604116	0.00152459
frlR	493.561	0.371703	0.108408	3.42874	0.000606385	0.00152922
mdoC	466.937	-0.382116	0.111528	-3.4262	0.000612085	0.00154139
yqiG	1351.16	0.263142	0.076802	3.42624	0.000612005	0.00154139
yqjC	1537.41	0.256839	0.0749858	3.42517	0.000614414	0.00154614
ulaG	1247.28	0.267541	0.0781371	3.424	0.000617073	0.00155172
tdh	1698.59	0.25271	0.0738638	3.4213	0.000623234	0.0015661
yddG	91.8456	-0.838563	0.245273	-3.4189	0.000628748	0.00157883
cbpA	264.147	-0.49883	0.145928	-3.41833	0.000630072	0.00158102
yecP	1281.68	-0.26576	0.0778017	-3.41587	0.000635792	0.00159424
fumC	189.664	-0.586356	0.171769	-3.41364	0.000641013	0.00160531
ypdF	491.427	-0.372077	0.108999	-3.41359	0.00064112	0.00160531
malI	62.1721	-1.01531	0.297504	-3.41275	0.000643107	0.00160914
yedZ	196.354	-0.576158	0.168889	-3.41146	0.000646149	0.0016156
rffC	297.909	0.466847	0.137003	3.40757	0.000655448	0.00163769
btuR	263.164	-0.497909	0.146205	-3.40554	0.000660327	0.00164871
srlB	498.124	-0.368832	0.108319	-3.40505	0.000661513	0.0016505
ytfT	1086.06	0.275198	0.0808364	3.40439	0.000663132	0.00165336
hcr	683.429	-0.322056	0.0946489	-3.40264	0.000667378	0.00166277
yjjW	902.68	0.290096	0.0852998	3.4009	0.000671654	0.00167224
cbpM	675.597	-0.323172	0.0950809	-3.39891	0.000676547	0.00168323
sodB	203.179	-0.563734	0.166016	-3.39566	0.00068464	0.00170133
xylF	1552.91	0.254195	0.07486	3.3956	0.000684786	0.00170133
ynbC	63.4182	-0.998683	0.294517	-3.39092	0.000696572	0.00172939
yniD	55.181	-1.06978	0.315957	-3.38584	0.000709612	0.00176052
ydiV	143.222	-0.666903	0.197044	-3.38454	0.000712978	0.00176762
yeeI	345.006	-0.433296	0.128197	-3.37993	0.000725038	0.00179626
fxsA	612.156	0.333695	0.0987539	3.37906	0.000727351	0.00180072
mglC	202.734	-0.561203	0.166237	-3.37592	0.000735703	0.00182011
lysP	420.593	0.393008	0.116472	3.37426	0.000740146	0.00182982
yhiQ	268.171	0.486499	0.144201	3.37376	0.000741501	0.00183188
ydiT	168.11	-0.613511	0.182135	-3.36844	0.000755961	0.0018663
wcaK	112.298	-0.747952	0.222063	-3.3682	0.000756604	0.00186657
atoB	614.938	-0.332534	0.0988485	-3.36407	0.000768008	0.00189338
acnA	200.878	-0.561536	0.166998	-3.36254	0.000772299	0.00190263
ycfS	277.465	-0.478799	0.142438	-3.36146	0.000775324	0.0019074
yfbK	356.347	-0.424272	0.126213	-3.36155	0.000775071	0.0019074
rusA	54.5009	-1.06691	0.317539	-3.35993	0.000779635	0.00191667
yjeP	601.096	0.334322	0.0995109	3.35965	0.000780415	0.00191725
ynaJ	291.609	-0.466977	0.13902	-3.35905	0.000782097	0.00192004
yceI	388.266	-0.406392	0.121259	-3.35144	0.000803928	0.00197226
ycgI	575.655	-0.340437	0.101653	-3.349	0.000811038	0.00198831
napH	534.256	-0.350966	0.105016	-3.34202	0.000831701	0.00203755
csgA	196.066	-0.564166	0.168964	-3.33897	0.000840898	0.00205865
potD	1037.89	-0.272482	0.0819954	-3.32314	0.000890102	0.00217759
nhaA	100.01	-0.780422	0.235097	-3.31957	0.00090157	0.00220412
corA	579.366	0.335511	0.101089	3.31898	0.000903485	0.00220726
ydhW	240.949	-0.506352	0.152651	-3.31706	0.000909696	0.0022209
yfhK	358.189	-0.417727	0.125945	-3.31674	0.000910739	0.0022219
rnk	447.105	-0.377062	0.113691	-3.31654	0.000911386	0.00222194
yfaT	571.11	-0.338177	0.102008	-3.31519	0.000915801	0.00223115
livJ	566.019	0.337968	0.102094	3.31038	0.000931696	0.00226831
fdnI	133.47	-0.675055	0.20396	-3.30974	0.000933838	0.00227195
ybjI	511.742	-0.35397	0.107032	-3.30714	0.000942528	0.00229151
tdcR	457.681	0.370425	0.112117	3.30391	0.000953467	0.00231634
yqeG	2058.78	0.239087	0.0723688	3.30374	0.000954059	0.00231634
ycbL	230.247	-0.515596	0.156122	-3.30252	0.000958203	0.0023248
pncB	297.208	-0.4545	0.137732	-3.29989	0.000967222	0.00234506
yhhH	568.646	0.335603	0.101894	3.29364	0.000988981	0.00239617
yrfC	423.547	0.38224	0.116103	3.29223	0.000993954	0.00240656
mipA	243.801	-0.499225	0.151768	-3.28939	0.00100406	0.00242934
hemG	8.39191	2.77485	0.843941	3.28796	0.00100915	0.00244
rnt	3.14144	-4.89512	1.4905	-3.28422	0.00102264	0.0024709
glcG	641.5	0.31801	0.0968364	3.284	0.00102346	0.0024712
ygaD	426.944	0.378985	0.115673	3.27634	0.00105162	0.0025357
ytfR	894.531	0.280323	0.0855565	3.27647	0.00105115	0.0025357
ycdU	315.663	-0.438091	0.133772	-3.27492	0.00105694	0.00254678
ycjR	410.607	-0.386579	0.118149	-3.27196	0.00106805	0.00257067
ydeW	120.24	-0.702322	0.214653	-3.27189	0.00106831	0.00257067
yecE	453.609	-0.369471	0.112943	-3.2713	0.00107055	0.00257429
fadH	740.953	0.298846	0.0914615	3.26745	0.00108519	0.00260773
ybhP	214.538	-0.527397	0.161586	-3.26387	0.00109902	0.00263914
rsxG	44.7699	-1.143	0.350304	-3.26287	0.00110289	0.00264664
yjiA	758.001	0.29582	0.0906768	3.26236	0.0011049	0.00264965
ycjF	64.1706	-0.952928	0.292415	-3.25882	0.00111875	0.00268105
ydiH	156.399	-0.614555	0.188642	-3.25779	0.00112284	0.00268901
folX	214.773	0.523441	0.160724	3.25677	0.00112689	0.00269686
ydfU	102.846	-0.753639	0.231726	-3.25228	0.00114481	0.0027379
yegE	240.131	-0.497066	0.152879	-3.25137	0.00114851	0.00274488
fsaA	737.476	-0.298564	0.0918471	-3.25066	0.00115137	0.00274984
leuB	1250.48	0.253769	0.0780918	3.24963	0.00115555	0.00275796
aas	1206.44	0.255699	0.0787362	3.24754	0.00116408	0.00277644
fklB	507.777	0.34747	0.10705	3.24587	0.00117091	0.00279082
yjhC	2065.79	0.234612	0.0723498	3.24274	0.00118387	0.00281981
yebW	154.855	-0.614384	0.189572	-3.24089	0.00119156	0.00283619
hdhA	189.415	-0.555198	0.171789	-3.23186	0.00122989	0.00292547
yeeN	222.479	-0.512871	0.158724	-3.23122	0.00123265	0.00293003
yjjJ	868.144	0.279007	0.0864059	3.22902	0.00124213	0.00295059
thrC	2063.66	0.233556	0.0723549	3.22793	0.0012469	0.00295991
astC	245.616	-0.487829	0.151168	-3.22707	0.00125067	0.00296332
hyfD	927.687	-0.273503	0.0847474	-3.22728	0.00124975	0.00296332
narL	197.866	-0.542581	0.168137	-3.22702	0.00125086	0.00296332
icdC	244.757	-0.48841	0.15145	-3.22489	0.00126019	0.00298342
ycaK	957.053	-0.270505	0.0839277	-3.22308	0.00126822	0.0030004
leuC	1570.21	0.24081	0.0747281	3.22249	0.00127082	0.00300454
yciH	295.435	-0.44492	0.138107	-3.22155	0.001275	0.00301238
ydjL	125.771	-0.676099	0.209896	-3.22112	0.00127691	0.00301487
yhcG	1411.82	0.245202	0.0761369	3.22054	0.0012795	0.00301896
lit	248.079	-0.484321	0.150412	-3.21997	0.00128204	0.00302294
ydaT	57.5695	-0.993373	0.308661	-3.21833	0.00128939	0.00303822
ypdH	659.416	-0.308861	0.0960204	-3.21662	0.0012971	0.00305436
ydcO	106.092	-0.733912	0.228233	-3.21563	0.00130159	0.00306287
yqhA	2076.7	0.232463	0.0723209	3.21433	0.0013075	0.00307472
rimK	477.626	-0.354574	0.110362	-3.21283	0.00131434	0.00308874
dgsA	102.677	-0.744498	0.231878	-3.21073	0.00132397	0.00310929
glnL	657.799	-0.308515	0.0961113	-3.20998	0.00132744	0.00311538
yjdI	410.055	0.378042	0.11784	3.20809	0.0013362	0.00313382
cld	395.863	-0.385301	0.120143	-3.20701	0.00134122	0.00314351
sufA	175.198	0.568557	0.177467	3.20374	0.00135656	0.00317735
qseC	174.987	-0.571859	0.178534	-3.20308	0.00135967	0.00318251
uxaB	183.072	-0.559171	0.174651	-3.20165	0.00136642	0.00319407
ygiQ	1809.11	0.234606	0.0732732	3.20179	0.00136575	0.00319407
yfcN	54.897	-1.011	0.315884	-3.20055	0.00137166	0.00320419
yoaI	134.425	-0.649683	0.203149	-3.19805	0.00138359	0.0032299
artJ	1109.09	-0.257386	0.0805436	-3.1956	0.00139538	0.00325374
ynbB	97.374	-0.760359	0.237943	-3.19555	0.00139565	0.00325374
glpB	365.616	-0.398167	0.124696	-3.1931	0.00140754	0.0032793
ycdY	249.483	-0.478873	0.149996	-3.19257	0.00141013	0.00328315
yegR	470.473	-0.354176	0.111105	-3.18778	0.00143372	0.00333586
yjjX	811.836	0.281866	0.0884326	3.18735	0.00143581	0.00333852
ydcI	106.486	-0.725104	0.227699	-3.18448	0.00145015	0.00336964
intR	371.694	-0.393984	0.123738	-3.18402	0.00145247	0.0033728
yfdY	266.813	-0.462003	0.145131	-3.18335	0.00145581	0.00337833
yhbS	719.396	0.294154	0.092503	3.17994	0.00147304	0.00341606
emrB	1266.06	0.247609	0.0778722	3.17969	0.00147434	0.00341682
mdtC	315.548	-0.424766	0.133748	-3.17588	0.00149382	0.00345967
paaH	265.093	-0.462381	0.145621	-3.17523	0.00149719	0.00346522
yeeS	205.86	-0.523259	0.164891	-3.17337	0.00150679	0.00348513
yeeT	155.035	-0.600554	0.189388	-3.17102	0.00151904	0.00351117
yciK	229.625	-0.494956	0.156243	-3.16786	0.00153567	0.00354727
yedI	330.567	-0.412702	0.130799	-3.15524	0.00160363	0.00370183
pqiB	195.933	-0.5317	0.168888	-3.14823	0.00164261	0.00378931
paaX	42.6235	-1.12928	0.358775	-3.14761	0.00164612	0.00379244
yhaO	581.186	0.317753	0.100945	3.14777	0.00164518	0.00379244
yjiR	431.136	0.362479	0.115173	3.14726	0.00164807	0.00379443
yjeS	727.833	-0.290494	0.0923104	-3.14692	0.00164998	0.00379637
gltD	1716.21	0.232083	0.0737576	3.14656	0.00165204	0.00379861
ychH	813.422	-0.278378	0.0885641	-3.14324	0.00167091	0.00383949
kefC	1632.73	0.233444	0.074277	3.14289	0.00167289	0.00384154
dcp	79.8038	-0.823919	0.262398	-3.13996	0.0016897	0.00387761
ddpD	126.367	-0.656953	0.209303	-3.13876	0.00169664	0.00389098
ypdA	214.352	-0.506806	0.161623	-3.13573	0.00171429	0.00392891
soxR	2879.38	0.225959	0.0721153	3.13331	0.00172847	0.00395883
mdtG	311.17	-0.42169	0.134667	-3.13136	0.00173996	0.00398256
yceB	615.53	-0.309244	0.0987839	-3.13051	0.00174502	0.00399154
paaA	396.594	-0.375497	0.120043	-3.12803	0.00175984	0.00402281
yebY	265.194	-0.455226	0.145546	-3.12771	0.00176176	0.0040246
yhdV	535.469	0.326834	0.104585	3.12505	0.00177773	0.00405844
narQ	937.309	-0.263905	0.0844628	-3.12452	0.00178098	0.00406323
pspF	182.42	-0.54603	0.174859	-3.12268	0.00179211	0.00408595
hcp	779.1	-0.28086	0.0899655	-3.12187	0.00179708	0.00409465
bacA	2287.03	0.224196	0.0719289	3.11691	0.00182756	0.00416139
ydiQ	131.331	-0.639914	0.205393	-3.11555	0.00183601	0.00417793
ydaN	88.326	-0.777126	0.249466	-3.11516	0.00183847	0.00418082
yjcH	1355.24	0.239049	0.0767553	3.11443	0.00184302	0.00418846
yjeB	128.253	-0.647026	0.207805	-3.11362	0.0018481	0.0041973
ydhL	47.5322	-1.05526	0.33916	-3.11138	0.00186218	0.0042247
yhbY	298.345	-0.427534	0.137413	-3.11131	0.00186257	0.0042247
yjgX	747.321	0.283494	0.0911698	3.10951	0.00187397	0.00424784
yqaA	692.257	-0.292491	0.0941399	-3.10698	0.0018901	0.00428163
arcB	125.533	0.647625	0.20869	3.10329	0.00191383	0.00433259
yedV	101.568	-0.722484	0.232918	-3.10188	0.00192298	0.0043505
baeS	126.031	-0.649017	0.209631	-3.09599	0.00196156	0.00443494
narK	156.549	-0.58298	0.188447	-3.0936	0.00197743	0.00446795
flgH	633.42	-0.301855	0.0975972	-3.09286	0.00198235	0.00447619
yedQ	169.074	-0.561073	0.181472	-3.09179	0.00198951	0.00448948
blr	79.7271	-0.809931	0.262406	-3.08656	0.00202487	0.00456634
macB	1142.27	-0.246437	0.0799287	-3.08321	0.00204782	0.00461514
yahG	1264.09	-0.24045	0.0780271	-3.08162	0.00205877	0.00463683
yjiZ	543.309	0.3201	0.103919	3.08029	0.00206801	0.00465468
ybgK	565.193	-0.315478	0.102443	-3.07956	0.00207305	0.00466305
mdoB	776.124	0.276725	0.0898907	3.07846	0.00208074	0.00467437
wcaJ	218.892	-0.492445	0.159956	-3.07862	0.0020796	0.00467437
yaaJ	1629.64	0.228616	0.0742978	3.07702	0.00209079	0.00469394
yfbS	245.98	-0.463939	0.151018	-3.07208	0.00212575	0.00476938
yfeK	639.835	-0.298537	0.0971939	-3.07156	0.00212942	0.00477456
yeiL	89.9827	-0.758462	0.247178	-3.06849	0.00215144	0.00482086
yddB	187.745	-0.528517	0.172412	-3.06543	0.00217354	0.0048673
pflA	413.675	-0.360461	0.117729	-3.06179	0.00220019	0.00492384
ycgN	250.246	-0.458286	0.149733	-3.0607	0.00220823	0.00493868
pldB	968.262	-0.255955	0.0836335	-3.06043	0.00221018	0.00493991
yjfN	818.749	0.269742	0.088167	3.05944	0.00221748	0.00495307
yjiE	370.307	0.377678	0.123479	3.05864	0.00222347	0.00496331
ybdH	183.956	-0.532551	0.174175	-3.05756	0.0022315	0.00497807
ybiN	359.062	-0.383976	0.125723	-3.05415	0.00225702	0.00503181
yjiY	959.984	0.255371	0.0836763	3.05189	0.00227407	0.0050666
sppA	193.973	-0.517487	0.169693	-3.04955	0.00229182	0.00510293
ybiJ	638.823	0.295698	0.0970008	3.04841	0.00230056	0.00511915
yraI	341.285	0.391125	0.12834	3.04758	0.00230691	0.00513002
nlpC	102.296	-0.706645	0.232117	-3.04435	0.00233186	0.00518224
kefF	1448.38	0.230648	0.0757736	3.04392	0.0023352	0.00518638
arnT	446.407	-0.345965	0.113731	-3.04195	0.00235052	0.0052171
tar	208.686	-0.497825	0.163743	-3.04027	0.00236363	0.0052429
ycbV	225.031	-0.479209	0.157761	-3.03756	0.00238499	0.00528695
ychA	306.579	-0.410724	0.135575	-3.02949	0.00244963	0.00542683
hyfR	106.545	-0.688917	0.227456	-3.02879	0.00245535	0.00543608
eamA	71.9362	-0.834836	0.275901	-3.02585	0.00247935	0.00548231
ycaN	320.383	-0.401668	0.132739	-3.026	0.00247812	0.00548231
hycC	665.835	0.288531	0.0953699	3.02539	0.00248311	0.00548716
yejH	207.424	-0.496506	0.164196	-3.02387	0.00249564	0.00551139
fdnH	255.996	-0.447431	0.148065	-3.02184	0.00251239	0.00554492
ygdR	1179.92	-0.239291	0.0792871	-3.01803	0.0025442	0.0056116
crcB	439.082	-0.345701	0.114586	-3.01695	0.00255332	0.00562819
guaC	1637.65	0.223888	0.0742434	3.01559	0.00256481	0.00564998
hisM	297.616	-0.414758	0.137558	-3.01515	0.00256852	0.0056546
ybcJ	425.738	-0.350207	0.116198	-3.01388	0.00257928	0.00567474
ygdE	1185.27	0.238223	0.0790718	3.01274	0.00258897	0.00569249
motB	129.427	-0.62281	0.206783	-3.01191	0.0025961	0.0057046
mltB	709.421	0.280018	0.0930129	3.01053	0.00260792	0.00572699
cobT	64.9294	-0.873415	0.290178	-3.00993	0.00261309	0.00573478
ymdF	305.947	-0.408399	0.135723	-3.00906	0.00262059	0.00574765
dsbB	28.8733	-1.31492	0.437102	-3.00827	0.00262742	0.00575905
yjhR	901.069	0.256631	0.085357	3.00656	0.00264221	0.00578785
ydcV	262.183	-0.438985	0.146323	-3.00012	0.00269875	0.00590802
ygfB	148.793	-0.579202	0.193131	-2.99901	0.00270858	0.00592587
betB	179.451	0.525828	0.175374	2.99833	0.00271466	0.0059318
xylE	1219.06	0.235513	0.0785473	2.99836	0.00271434	0.0059318
ttdB	2801.14	0.215673	0.0720029	2.99534	0.00274143	0.00598657
ybjJ	380.839	-0.36627	0.122315	-2.99448	0.0027491	0.00599959
ptr	1249.03	-0.23413	0.0782352	-2.99264	0.00276578	0.00602852
ydjQ	99.5817	-0.70371	0.235134	-2.9928	0.00276428	0.00602852
ycjN	63.7229	-0.875709	0.2928	-2.99081	0.00278237	0.0060609
ymfD	422.655	-0.34841	0.116574	-2.98874	0.00280129	0.00609836
hyaD	290.188	-0.415932	0.139256	-2.9868	0.0028191	0.00613333
fabH	2.23786	4.83244	1.61878	2.98523	0.00283369	0.00616126
ydeV	96.7446	-0.711647	0.238444	-2.98454	0.00284002	0.0061712
yciE	131.974	-0.611012	0.204785	-2.98368	0.00284801	0.00618475
paaD	350.094	-0.379509	0.127252	-2.98235	0.00286046	0.00620795
djlA	3347.61	0.218075	0.0731281	2.98209	0.00286287	0.00620934
nhaB	828.692	-0.262054	0.0879767	-2.97867	0.00289502	0.00627522
ycbQ	41.3181	-1.08208	0.363372	-2.9779	0.00290234	0.00628721
ldhA	180.282	-0.523152	0.17582	-2.97549	0.00292518	0.00633278
hisL	183.207	-0.518914	0.174429	-2.97492	0.00293061	0.00634064
aaeA	1262.21	0.231785	0.0779285	2.97433	0.00293632	0.00634908
yeaL	86.3253	-0.749978	0.252173	-2.97406	0.00293889	0.00635074
ybiI	2849.52	-0.214157	0.0721221	-2.96937	0.00298413	0.00644455
agaB	368.477	0.367245	0.123776	2.96702	0.00300701	0.00648998
ypdB	412.917	-0.34949	0.117814	-2.96645	0.00301256	0.00649797
ydcH	231.948	-0.460631	0.155398	-2.9642	0.00303474	0.00654179
garK	526.886	0.31204	0.105329	2.96253	0.00305127	0.00657339
recN	902.497	-0.253182	0.085474	-2.96209	0.00305556	0.00657861
fadE	1588.09	0.220812	0.0745943	2.96018	0.00307464	0.00661565
ydiF	75.1705	-0.79804	0.269843	-2.95742	0.00310225	0.00667098
ygcG	548.722	0.305748	0.103469	2.95497	0.00312699	0.00672007
ais	1045.57	-0.241554	0.0818048	-2.95281	0.00314892	0.00676306
maeB	730.91	-0.272013	0.0921405	-2.95215	0.0031557	0.00677348
aqpZ	876.579	-0.254676	0.0862943	-2.95125	0.0031649	0.0067891
yfjQ	242.792	-0.447787	0.151942	-2.94708	0.00320788	0.0068771
ytfM	24.7957	1.3664	0.463844	2.94582	0.00322098	0.00690099
yjfI	382.187	0.358369	0.121677	2.94526	0.00322688	0.00690941
add	97.2702	-0.700167	0.237808	-2.94425	0.00323733	0.00692758
yfcE	97.4145	-0.699634	0.237693	-2.94344	0.00324586	0.00694159
yebG	274.109	-0.421245	0.143175	-2.94216	0.00325935	0.00696622
ykgM	1434.21	0.223286	0.0759104	2.94144	0.00326691	0.00697814
potF	338.988	-0.379928	0.129184	-2.94098	0.00327178	0.00698429
yfeS	487.341	-0.32126	0.109342	-2.93813	0.00330199	0.00704452
yoeF	212.573	-0.476524	0.162222	-2.93748	0.00330893	0.00705504
ddg	228.557	-0.459491	0.156506	-2.93593	0.00332554	0.00708615
ybiA	294.395	-0.405852	0.138281	-2.93498	0.00333568	0.00710346
ychN	310.362	-0.39513	0.134766	-2.93198	0.00336807	0.00716377
yncD	144.542	-0.574217	0.195841	-2.93205	0.00336729	0.00716377
ydcJ	88.2376	-0.730379	0.249418	-2.92833	0.00340791	0.00724413
yajQ	1598.81	-0.218278	0.0746077	-2.92568	0.00343708	0.00730173
nirC	125.107	0.610634	0.208872	2.92348	0.00346139	0.00734893
tdcG	775.99	0.26275	0.0898855	2.92316	0.00346497	0.0073521
gatD	589.756	-0.293641	0.100555	-2.92019	0.00349816	0.00741803
ymfA	105.869	-0.665753	0.228036	-2.91951	0.00350583	0.00742983
caiD	3512.22	0.21452	0.073587	2.91518	0.00355478	0.00752789
ssuD	687.441	-0.275162	0.0943937	-2.91504	0.00355638	0.00752789
mrcA	714.016	0.27018	0.0927644	2.91254	0.00358505	0.007584
ydaO	340.922	-0.375092	0.128825	-2.91165	0.00359525	0.00760102
cspB	49.2318	-0.968674	0.332751	-2.9111	0.00360154	0.00760974
yjjA	434.626	0.333836	0.114756	2.90909	0.00362485	0.00765439
gltJ	345.654	-0.372283	0.127997	-2.90853	0.00363135	0.00766352
ydiZ	105.574	-0.663696	0.228299	-2.90713	0.00364762	0.00769323
napC	394.53	-0.349342	0.120298	-2.90397	0.00368464	0.00776529
rluA	1860.96	-0.212334	0.0731217	-2.90384	0.00368619	0.00776529
yqcD	1578.08	-0.216865	0.0747617	-2.90075	0.00372265	0.0078374
potC	475.247	-0.320574	0.110545	-2.89996	0.00373214	0.00785268
glpD	18033	0.32799	0.113169	2.89823	0.00375272	0.00789125
ygjJ	1586.31	0.216164	0.0746051	2.89745	0.0037621	0.00790624
yfeZ	858.713	-0.251693	0.0868959	-2.89649	0.00377366	0.00792581
edd	216.806	-0.465109	0.160632	-2.8955	0.00378555	0.00794605
emrA	1061.05	0.235344	0.0813404	2.89333	0.00381183	0.00799642
yidF	3335.3	0.211399	0.0730953	2.89211	0.00382668	0.00802281
ulaC	550.601	0.298679	0.103314	2.89098	0.0038404	0.00804678
yagE	926.042	0.244407	0.0846078	2.8887	0.00386837	0.00809573
yciG	37.9241	-1.09572	0.379302	-2.88879	0.00386725	0.00809573
ybgS	313.581	-0.387271	0.134087	-2.88821	0.00387446	0.00810366
creC	1197.65	0.227676	0.0788765	2.88648	0.00389574	0.00814331
yddW	119.507	-0.619717	0.214889	-2.8839	0.00392785	0.00820556
livK	513.414	0.307035	0.106534	2.88203	0.00395121	0.00824947
ydhX	188.055	-0.495088	0.172217	-2.87479	0.00404299	0.00843609
yagF	466.976	0.319201	0.111113	2.87276	0.00406899	0.0084853
sufC	202.518	0.474046	0.165308	2.86766	0.00413521	0.00861828
ygjQ	1585.04	0.213611	0.0746149	2.86284	0.00419857	0.00874515
dcm	230.267	-0.445147	0.155909	-2.85518	0.00430129	0.00895381
moaA	357.285	-0.359573	0.125991	-2.85396	0.00431776	0.00898278
yceF	186.133	-0.493374	0.173054	-2.85099	0.00435831	0.00906179
osmC	58.7311	-0.865544	0.304492	-2.84259	0.00447491	0.00929873
mntR	392.953	-0.342204	0.120506	-2.83973	0.00451515	0.0093768
recX	190.645	0.483258	0.170275	2.8381	0.00453833	0.00941695
ybjM	649.866	-0.273983	0.096541	-2.83799	0.00453984	0.00941695
yceJ	308.688	-0.383156	0.135077	-2.83657	0.00456003	0.00945327
flxA	29.0294	-1.23034	0.43392	-2.83542	0.00457661	0.00948205
ypeB	990.74	-0.235342	0.0830519	-2.83368	0.00460158	0.00952817
yaaA	1918.31	0.206088	0.0728128	2.83038	0.00464922	0.00962114
yjcC	2245.25	0.203733	0.0719862	2.83017	0.00465232	0.0096219
cspD	982.95	-0.235514	0.0832389	-2.82938	0.00466383	0.00964004
oppF	142.493	-0.557448	0.197107	-2.82815	0.00468186	0.00967162
sfsB	1026.31	0.232065	0.0820883	2.82702	0.00469829	0.00969987
ygfU	1822.97	-0.20671	0.0732878	-2.82052	0.00479451	0.00989273
ulaB	1319.46	0.217544	0.0771813	2.81862	0.0048231	0.00994588
cstA	756.066	-0.256136	0.0909488	-2.81627	0.00485854	0.0100131
yagG	592.722	0.28176	0.100088	2.81511	0.00487606	0.0100433
wcaF	1008.94	-0.232519	0.0826204	-2.81431	0.00488819	0.0100624
ycjY	28.8551	-1.22299	0.43475	-2.81308	0.00490695	0.0100951
yqjG	923.359	0.238106	0.0846859	2.81164	0.00492895	0.0101345
yjhB	575.186	0.284776	0.101375	2.80913	0.00496761	0.010208
yrdB	480.744	0.308063	0.109674	2.8089	0.00497109	0.0102092
hisF	393.047	-0.338141	0.120476	-2.80671	0.00500507	0.010273
yieI	565.251	0.286696	0.102154	2.80651	0.00500814	0.0102733
yobF	512.462	-0.299903	0.106891	-2.80569	0.00502085	0.0102933
yjeM	493.386	0.304053	0.10841	2.80466	0.00503704	0.0103205
yggL	523.074	0.295996	0.105651	2.80164	0.00508437	0.0104114
minC	114.768	-0.612613	0.219122	-2.79577	0.00517766	0.0105963
torR	362.615	-0.349672	0.125105	-2.79502	0.00518962	0.0106084
ymfQ	552.603	-0.289075	0.103418	-2.7952	0.00518678	0.0106084
yhjK	884.405	0.239869	0.0858706	2.79338	0.00521606	0.0106563
yjjU	835.705	0.244474	0.0875268	2.79313	0.00522007	0.0106583
aspA	432.779	0.320979	0.114963	2.79202	0.00523797	0.0106886
yfcT	114.271	-0.61289	0.219588	-2.79108	0.00525318	0.0107134
yegK	138.012	-0.558697	0.200188	-2.79086	0.00525678	0.0107146
yccJ	605.144	-0.277117	0.0994612	-2.78618	0.00533325	0.0108641
rtcR	343.189	0.356447	0.127974	2.7853	0.00534776	0.0108874
ybdR	912.562	-0.237019	0.0851574	-2.7833	0.00538087	0.0109485
fliM	93.9223	-0.672166	0.241657	-2.78149	0.00541096	0.0110033
hchA	263.629	-0.405694	0.145917	-2.78031	0.0054307	0.0110371
yccX	160.607	-0.515856	0.185895	-2.77499	0.00552039	0.0112129
ydcN	60.1579	-0.834123	0.300717	-2.77378	0.00554089	0.011248
yehS	327.456	-0.363768	0.1313	-2.77052	0.0055967	0.0113548
rimL	96.0261	-0.662388	0.239109	-2.77023	0.00560159	0.0113582
caiB	2232.4	0.19907	0.0720057	2.76464	0.00569854	0.0115481
yccK	3.15578	-4.11845	1.49005	-2.76397	0.00571036	0.0115654
yihI	1029.73	0.22664	0.0820053	2.76372	0.00571458	0.0115673
yjhI	1874.07	0.201669	0.0729856	2.76313	0.00572502	0.0115817
xapA	282.53	-0.388702	0.14099	-2.75695	0.00583424	0.0117959
flhB	257.831	-0.406499	0.147465	-2.75658	0.0058409	0.0118026
gltI	993.754	0.228275	0.0828298	2.75596	0.00585207	0.0118184
mepA	232.066	-0.42689	0.155303	-2.74875	0.00598221	0.0120743
napD	315.963	-0.367027	0.133562	-2.74799	0.00599622	0.0120956
smpB	2.24221	-4.40652	1.60804	-2.7403	0.00613836	0.0123752
trg	142.881	-0.53909	0.19678	-2.73956	0.0061521	0.0123958
rseB	474.55	-0.302799	0.110613	-2.73746	0.00619151	0.0124681
xapR	535.734	-0.286689	0.104819	-2.73509	0.00623628	0.0125489
yecG	87.8497	-0.682937	0.249706	-2.73496	0.00623877	0.0125489
ydhC	90.8416	-0.671369	0.245536	-2.7343	0.00625126	0.0125668
sdhD	1852.73	-0.199974	0.0731503	-2.73375	0.00626182	0.0125809
yafL	686.902	0.257417	0.0941949	2.73281	0.00627958	0.0126021
yegP	606.968	-0.271409	0.0993129	-2.73286	0.00627863	0.0126021
yraP	445.232	0.309996	0.11349	2.73149	0.00630496	0.0126459
ogt	58.5161	-0.832111	0.304759	-2.73039	0.00632596	0.0126808
astD	167.858	-0.496273	0.181887	-2.72846	0.00636307	0.0127479
gloB	200.6	-0.455036	0.166787	-2.72825	0.00636718	0.0127488
ybgA	414.182	-0.320671	0.117607	-2.72664	0.00639833	0.0128039
yoeE	171.184	-0.490986	0.180236	-2.72412	0.00644722	0.0128944
yjhT	446.79	0.308572	0.11334	2.72253	0.00647837	0.0129494
yidA	212.916	0.438631	0.161347	2.71856	0.00655676	0.0130986
yeeW	80.3969	-0.708341	0.260713	-2.71694	0.00658894	0.0131554
eutB	1532.33	-0.203883	0.0751155	-2.71426	0.0066424	0.0132547
sfcA	184.112	-0.471534	0.173913	-2.71132	0.00670152	0.013365
yfbN	225.989	-0.426393	0.157327	-2.71022	0.00672378	0.0134019
yliJ	1201.99	-0.213844	0.0789195	-2.70965	0.00673538	0.0134174
yeeA	180.959	-0.475187	0.175394	-2.70925	0.00674347	0.0134259
alx	1328	0.208646	0.0770738	2.70709	0.00678752	0.0135059
chiA	433.516	0.310975	0.114887	2.70678	0.00679386	0.0135109
ybdA	354.174	0.340399	0.126078	2.6999	0.00693607	0.0137859
sbcB	428.55	-0.312434	0.1158	-2.69804	0.00697482	0.0138551
ygaP	645.933	0.259761	0.0965554	2.69028	0.00713929	0.0141738
yghA	1401.26	0.205094	0.0762476	2.68984	0.00714868	0.0141845
ubiG	667.583	-0.256419	0.0954795	-2.68559	0.00724014	0.0143497
ydeU	165.554	-0.491769	0.183111	-2.68563	0.00723941	0.0143497
ycdH	157.113	-0.504163	0.187842	-2.68397	0.00727536	0.0144114
yehQ	163.649	-0.49362	0.18413	-2.68083	0.00734408	0.0145394
ybgI	594.964	-0.268489	0.100166	-2.68046	0.00735218	0.0145425
ygcN	576.194	0.271539	0.101306	2.68038	0.00735394	0.0145425
flgL	127.136	-0.557781	0.208336	-2.67732	0.00742133	0.0146675
thiS	360.406	0.334532	0.125056	2.67506	0.00747152	0.0147584
wcaA	292.04	-0.370433	0.13874	-2.66998	0.00758566	0.0149755
ydgA	138.291	-0.533428	0.199861	-2.66899	0.00760799	0.0150112
alkB	567.17	-0.272534	0.102233	-2.66583	0.0076799	0.0151446
yfbW	530.21	-0.280564	0.105285	-2.6648	0.0077035	0.0151826
nudG	92.6979	-0.646748	0.243096	-2.66047	0.00780327	0.0153706
rstB	124.085	-0.560436	0.210755	-2.65918	0.00783303	0.0154206
yhbW	833.865	0.232797	0.0875916	2.65775	0.00786642	0.0154777
aat	493.182	-0.288643	0.108706	-2.65526	0.00792484	0.0155839
chbG	168.254	-0.482163	0.181644	-2.65443	0.00794414	0.0156131
gadC	187.933	-0.456384	0.172166	-2.65083	0.00802937	0.015763
ybjO	538.59	-0.277197	0.104567	-2.6509	0.00802777	0.015763
ygjG	909.529	0.225273	0.0850863	2.64759	0.00810684	0.0159062
yddA	28.504	-1.15502	0.436492	-2.64613	0.00814173	0.0159658
ybiY	690.021	-0.249054	0.0942223	-2.64325	0.00821132	0.0160933
yccS	136.782	-0.530876	0.200939	-2.64198	0.00824225	0.0161449
ynjD	108.094	-0.595403	0.225447	-2.64099	0.00826639	0.0161832
yebS	324.933	-0.347692	0.13175	-2.63903	0.00831432	0.0162679
ymcC	139.725	-0.524498	0.198867	-2.63744	0.00835355	0.0163356
ftsB	2.08502	-4.30823	1.63476	-2.63538	0.0084043	0.0164257
pntA	106.028	-0.599699	0.227586	-2.63504	0.00841268	0.016433
agaI	356.389	0.330931	0.12571	2.63249	0.00847616	0.0165395
puuB	274.243	-0.376562	0.143055	-2.63229	0.00848126	0.0165395
ynbE	67.378	-0.748069	0.28419	-2.63228	0.00848134	0.0165395
ycdX	338.748	-0.339595	0.129158	-2.62931	0.00855581	0.0166755
ycaD	811.23	-0.23282	0.0886146	-2.62733	0.00860568	0.0167634
slyD	679.86	0.2483	0.0945734	2.62547	0.00865284	0.016846
yqeB	1986.96	0.190516	0.0725769	2.62502	0.00866435	0.0168591
rluC	10.2482	-1.95103	0.743731	-2.6233	0.00870828	0.0169352
cbl	102.444	-0.606815	0.231484	-2.62141	0.00875658	0.0170197
fliN	109.688	-0.586372	0.223881	-2.61913	0.00881551	0.0171248
uvrY	86.9482	-0.655828	0.250785	-2.6151	0.00892017	0.0173185
yidG	3233.81	0.190441	0.072837	2.61462	0.00893265	0.0173332
fliG	116.658	-0.567462	0.217262	-2.61188	0.0090047	0.0174634
yeaN	290.582	-0.362993	0.139069	-2.61016	0.00904998	0.0175415
aroG	265.594	-0.378431	0.145319	-2.60415	0.00921038	0.0178426
gcvT	60.6122	-0.779265	0.299296	-2.60366	0.00922354	0.0178582
oppB	217.892	-0.416838	0.160117	-2.60333	0.00923226	0.0178598
yhaM	1983.62	0.188962	0.0725869	2.60325	0.00923449	0.0178598
uup	167.825	0.471298	0.181069	2.60287	0.00924482	0.0178675
yfbF	774.479	-0.234572	0.0901255	-2.60272	0.00924863	0.0178675
yjdK	401.256	0.30919	0.118959	2.59912	0.00934629	0.0180462
hybB	653.075	0.249348	0.0961323	2.5938	0.00949229	0.018308
rfbB	198.253	-0.435076	0.167734	-2.59385	0.00949092	0.018308
elbA	346.391	-0.331019	0.127796	-2.59021	0.00959179	0.0184898
adiY	417.744	0.30255	0.116821	2.58985	0.00960182	0.018499
yhdE	1767.94	0.190284	0.0734787	2.58965	0.00960729	0.0184994
yccM	275.484	-0.369148	0.142696	-2.58695	0.00968294	0.0186322
ytfL	1231.43	0.202717	0.0783657	2.58681	0.00968684	0.0186322
ycaC	758.192	-0.234881	0.0908386	-2.5857	0.00971827	0.0186824
yqjB	1475.65	-0.195391	0.0756062	-2.58433	0.00975695	0.0187466
napA	673.974	-0.245571	0.0950961	-2.58235	0.00981311	0.0188442
ymfE	101.175	-0.600523	0.232814	-2.57941	0.00989696	0.0189948
ftn	23.4912	-1.23958	0.480994	-2.57713	0.00996256	0.0191103
spy	229.852	-0.401827	0.15598	-2.57614	0.00999095	0.0191543
yjiP	475.272	0.28392	0.110227	2.57578	0.0100015	0.0191642
yfbL	301.316	-0.351646	0.136614	-2.57401	0.0100527	0.0192517
hisD	170.959	-0.463251	0.180223	-2.57043	0.0101573	0.0194308
yeaA	118.484	-0.553982	0.215507	-2.5706	0.0101523	0.0194308
yeiI	262.514	-0.375411	0.146124	-2.56912	0.0101957	0.0194937
osmB	56.4373	-0.794833	0.30981	-2.56555	0.0103012	0.0196847
araG	120.114	-0.548605	0.214135	-2.56196	0.0104083	0.0198786
dicB	84.3895	-0.6515	0.254367	-2.56126	0.0104294	0.0199081
ybgE	367.256	-0.318201	0.1243	-2.55994	0.010469	0.0199728
tsr	585.524	0.257521	0.100612	2.55954	0.0104812	0.0199853
ymdC	509.61	-0.274155	0.107134	-2.55899	0.0104978	0.0200061
yjhV	1220.6	0.200647	0.0785263	2.55515	0.0106141	0.0202168
csiE	141.963	-0.503749	0.197299	-2.55322	0.0106732	0.0203183
ompN	36.3838	-0.982969	0.385625	-2.54903	0.0108023	0.0205531
yggH	316.183	-0.339562	0.133495	-2.54363	0.0109709	0.0208624
yehB	6.86299	-2.36465	0.929723	-2.5434	0.0109781	0.0208648
appC	195.242	-0.429529	0.168923	-2.54276	0.0109982	0.0208918
ykfB	1000.76	0.209903	0.0826657	2.53918	0.0111114	0.0210954
ybgQ	105.113	-0.579583	0.228448	-2.53705	0.0111792	0.0212013
ygjO	1901.59	0.184902	0.0728755	2.53723	0.0111734	0.0212013
fixC	280.108	0.357098	0.141062	2.5315	0.0113577	0.0215226
ydeQ	5.90153	-2.58197	1.01998	-2.5314	0.0113609	0.0215226
cybB	56.4905	-0.782815	0.309649	-2.52807	0.011469	0.0217159
yafQ	868.097	0.218399	0.0864043	2.52764	0.0114832	0.0217311
yaiB	540.111	-0.26387	0.104422	-2.52696	0.0115055	0.0217614
citE	112.431	-0.558705	0.221114	-2.52677	0.0115117	0.0217615
ydfV	50.0459	0.82227	0.325972	2.52252	0.0116519	0.0220147
hofB	514.036	0.268482	0.106447	2.52222	0.0116618	0.0220216
yddJ	118.774	-0.542296	0.215184	-2.52015	0.0117306	0.0221397
serA	3.75818	-3.5802	1.42179	-2.51809	0.0117994	0.0222576
tatB	25.8453	-1.15233	0.457736	-2.51746	0.0118205	0.0222853
hcaC	303.103	0.341529	0.135798	2.51498	0.0119039	0.0224307
ycaO	963.238	-0.210328	0.083727	-2.51207	0.0120025	0.0225922
yfbG	922.11	-0.213183	0.0848607	-2.51216	0.0119996	0.0225922
yfcG	188.764	-0.431313	0.171773	-2.51095	0.0120406	0.0226517
pgpB	23.7348	-1.19842	0.4775	-2.50979	0.0120805	0.0227146
ego	117.508	-0.542402	0.21636	-2.50694	0.0121781	0.022886
cobU	176.647	-0.444217	0.177309	-2.50533	0.0122337	0.0229783
tolA	38.5261	-0.93683	0.374297	-2.50291	0.0123178	0.0231114
yqhC	824.653	0.220117	0.087943	2.50296	0.0123161	0.0231114
ydjR	106.009	-0.568877	0.227528	-2.50025	0.0124105	0.023273
ygfH	614.479	0.24632	0.0985765	2.49877	0.0124624	0.0233578
ydaW	61.267	-0.740639	0.297386	-2.4905	0.0127564	0.0238962
osmE	138.923	-0.495953	0.199345	-2.48791	0.0128496	0.024058
yqgE	335.149	-0.322484	0.129814	-2.48419	0.0129847	0.024298
ydfE	135.741	-0.500745	0.201606	-2.48378	0.0129997	0.0243132
ybgT	1.59843	4.3385	1.74999	2.47916	0.0131693	0.0246172
cspI	54.4528	-0.78111	0.315206	-2.4781	0.0132085	0.0246774
hisC	194	-0.419614	0.169438	-2.47651	0.0132675	0.0247745
galS	231.954	-0.384111	0.155209	-2.4748	0.0133311	0.0248801
hybO	905.16	0.210693	0.0852222	2.47228	0.0134255	0.0250428
elaD	455.539	-0.278092	0.112606	-2.46961	0.0135259	0.0252168
cspE	203.761	-0.407892	0.165433	-2.4656	0.0136783	0.0254739
yjfK	509.898	0.263443	0.106845	2.46565	0.0136765	0.0254739
hisQ	240.793	-0.375542	0.152403	-2.46414	0.0137341	0.0255642
poxB	510.303	-0.263646	0.107053	-2.46277	0.0137867	0.0256216
ppiD	833.86	-0.216125	0.087754	-2.46286	0.0137835	0.0256216
ydjM	67.1233	-0.700317	0.284351	-2.46286	0.0137833	0.0256216
dmsD	199.541	-0.410977	0.167108	-2.45936	0.0139186	0.025853
fliP	122.973	-0.520124	0.211568	-2.45843	0.0139545	0.0259061
artP	344.121	-0.315011	0.128175	-2.45766	0.0139844	0.0259479
hmp	609.335	-0.243596	0.0991358	-2.4572	0.0140026	0.0259679
rsxB	25.8478	-1.12202	0.456897	-2.45575	0.0140591	0.026059
yehM	163.233	-0.452318	0.184255	-2.45485	0.0140945	0.0261108
btuD	69.9765	-0.682553	0.278538	-2.45049	0.0142663	0.0264151
deoC	1151.22	-0.195319	0.0797474	-2.44922	0.0143164	0.0264812
yfjR	113.527	-0.538761	0.219973	-2.44921	0.014317	0.0264812
ycaM	416.595	-0.286882	0.11725	-2.44675	0.0144149	0.0266482
yhhZ	160.647	0.452128	0.184852	2.44589	0.0144494	0.0266979
sgrR	1558.12	0.182824	0.0748197	2.44353	0.0145443	0.0268593
ynaI	22.6659	-1.19333	0.488643	-2.44214	0.0146005	0.0269489
dacD	229.859	-0.380456	0.155903	-2.44034	0.0146736	0.0270555
gshB	423.1	-0.284117	0.116425	-2.44034	0.0146734	0.0270555
uspF	85.1875	-0.616907	0.253042	-2.43796	0.0147703	0.0272194
ampE	450.198	0.275247	0.112925	2.43743	0.0147921	0.0272453
ydeN	123.649	-0.514301	0.211034	-2.43705	0.0148078	0.02726
yecT	196.827	-0.409884	0.168214	-2.43669	0.0148226	0.0272729
mfd	1136.67	0.194568	0.0798832	2.43566	0.0148646	0.0273359
fepE	262.766	-0.35543	0.146023	-2.43408	0.0149298	0.0274416
yfaU	525.924	-0.257089	0.105633	-2.4338	0.0149414	0.0274485
gutM	148.069	-0.470134	0.193217	-2.4332	0.0149662	0.0274797
ddpF	75.5064	-0.652482	0.268403	-2.43098	0.0150581	0.027634
topB	56.8752	-0.748943	0.308294	-2.42931	0.0151275	0.0277469
ypjF	922.98	0.205701	0.0846996	2.42859	0.0151575	0.0277874
ubiX	2.8366	3.69348	1.52213	2.42653	0.0152441	0.0279316
caiF	2229.82	0.174525	0.0720107	2.4236	0.0153676	0.0281433
cirA	367.1	-0.301174	0.124317	-2.42263	0.0154084	0.0282019
yfcI	252.105	-0.360899	0.14898	-2.42246	0.0154157	0.0282019
astB	227.893	-0.378892	0.156593	-2.4196	0.0155374	0.0283952
trpD	34.5665	0.94558	0.390792	2.41965	0.0155355	0.0283952
hlpA	333.755	0.313391	0.129651	2.4172	0.0156406	0.0285602
pepN	136.634	-0.485776	0.200973	-2.41712	0.015644	0.0285602
yohL	99.377	-0.567336	0.234779	-2.41647	0.0156716	0.0285958
torS	452.68	-0.272775	0.112924	-2.41557	0.0157108	0.0286227
yafW	1027.12	0.198244	0.0820645	2.41571	0.0157046	0.0286227
ybfA	451.403	0.272532	0.112816	2.41571	0.0157045	0.0286227
hokB	110.701	-0.537436	0.222682	-2.41347	0.0158014	0.028773
ubiH	1.5303	4.26261	1.76814	2.4108	0.0159177	0.0289698
mrr	533.214	0.252339	0.104749	2.409	0.0159964	0.0290979
iscA	41.5902	0.859112	0.356784	2.40793	0.0160432	0.0291529
yfcC	361.004	-0.301617	0.125254	-2.40804	0.0160384	0.0291529
caiC	2353.04	0.172923	0.0718566	2.4065	0.0161064	0.0292525
narG	283.972	-0.338223	0.140573	-2.40602	0.0161272	0.0292754
pspC	131.638	-0.491948	0.204549	-2.40504	0.0161707	0.0293346
uspE	129.093	-0.496787	0.206574	-2.40489	0.0161774	0.0293346
yegW	18.2287	-1.31075	0.545073	-2.40472	0.0161849	0.0293346
xdhB	1599.42	0.179055	0.0745103	2.40309	0.0162572	0.0294505
yfcY	219.862	-0.38285	0.159334	-2.40281	0.0162695	0.0294576
ydjX	89.4273	-0.593332	0.24712	-2.40098	0.0163511	0.0295902
lysS	16.4905	-1.37363	0.573626	-2.39465	0.0166363	0.0300907
dicC	30.4952	-1.00548	0.42021	-2.39281	0.0167199	0.0302263
yoeA	216.22	-0.384379	0.16066	-2.3925	0.0167339	0.0302362
yfbE	333.781	-0.310858	0.130024	-2.39078	0.0168125	0.0303626
allA	1330.35	-0.184093	0.0771389	-2.38652	0.0170088	0.0306881
yegS	276.357	-0.339992	0.142465	-2.38649	0.0170102	0.0306881
melR	395.868	0.284835	0.119707	2.37943	0.0173394	0.0312661
yccU	220.809	-0.378075	0.159006	-2.37774	0.0174191	0.0313936
ydiJ	118.941	-0.511048	0.214992	-2.37705	0.0174516	0.0314361
yciO	95.7674	-0.565943	0.238909	-2.36886	0.017843	0.0321247
chbF	106.421	-0.537182	0.227005	-2.36638	0.0179628	0.0323239
lplA	667.53	0.225293	0.0952768	2.36462	0.0180488	0.0324619
yeiB	151.78	-0.451058	0.190869	-2.36318	0.0181187	0.032571
cadA	241.279	0.358434	0.151722	2.36245	0.0181548	0.0325939
paaK	108.119	-0.531914	0.225149	-2.3625	0.0181521	0.0325939
ynjB	136.92	-0.473964	0.200632	-2.36236	0.0181592	0.0325939
yheL	1.70626	-4.03399	1.7106	-2.35823	0.0183625	0.032942
yfaH	498.17	-0.254985	0.10819	-2.35682	0.0184324	0.0330506
ydeH	41.4211	-0.848933	0.360524	-2.35472	0.0185369	0.0332209
solA	104.419	-0.538497	0.22906	-2.3509	0.018728	0.0335464
ulaR	501.875	0.25268	0.107594	2.34846	0.0188512	0.0337498
ybdB	722.08	-0.217278	0.0925379	-2.34799	0.0188748	0.033775
puuE	319.262	-0.31098	0.132818	-2.34141	0.0192113	0.0343422
ymgA	77.0139	-0.62212	0.265694	-2.34149	0.0192071	0.0343422
ybhS	221.148	-0.371842	0.158871	-2.34053	0.0192562	0.0344001
ygeY	2014.53	-0.1698	0.0725519	-2.3404	0.0192633	0.0344001
yheN	1.68769	-4.0121	1.71501	-2.3394	0.0193146	0.0344743
thiP	1141.14	0.186333	0.0798119	2.33465	0.0195615	0.0348973
ydcD	35.4172	-0.908868	0.389546	-2.33315	0.0196403	0.035013
ydgJ	71.9443	-0.640774	0.274653	-2.33303	0.0196463	0.035013
ybaD	621.408	0.228868	0.0981279	2.33234	0.0196827	0.0350601
idi	1391.63	0.177997	0.0763488	2.33136	0.0197344	0.0351345
yhcF	903.948	0.198656	0.0852615	2.32996	0.019808	0.0352477
ynjC	171.077	-0.419086	0.180037	-2.32778	0.0199237	0.0354356
rbsR	862.659	0.201423	0.0865909	2.32614	0.020011	0.0355728
uidC	109.302	-0.520871	0.223939	-2.32595	0.0200211	0.0355729
hscC	419.578	-0.271635	0.116858	-2.32449	0.0200992	0.0356936
yhaI	679.555	0.219695	0.0945962	2.32246	0.0202084	0.0358694
hybE	822.315	0.204363	0.0880188	2.3218	0.0202435	0.0358954
ydaY	29.2453	-0.995681	0.428831	-2.32185	0.0202412	0.0358954
yfdO	145.083	-0.452701	0.195091	-2.32046	0.0203159	0.0360057
seqA	1.66213	-3.99246	1.72089	-2.32	0.0203407	0.0360315
ybiO	459.46	-0.259136	0.112166	-2.3103	0.0208717	0.036935
yfeG	1158.83	-0.183926	0.0796056	-2.31047	0.020862	0.036935
yaeH	568.366	0.235376	0.101897	2.30993	0.020892	0.0369522
yjfZ	835.436	0.202112	0.087542	2.30874	0.0209577	0.0370499
yaeI	744.58	0.210713	0.09128	2.30843	0.0209753	0.0370624
syd	640.672	-0.224045	0.0970743	-2.30797	0.0210007	0.0370886
yedK	98.2785	-0.544263	0.235844	-2.30773	0.0210143	0.037094
yadD	592.511	0.230601	0.1001	2.30371	0.0212392	0.0374721
focA	940.6	-0.19416	0.0843216	-2.30261	0.0213008	0.0375432
rlpA	305.275	-0.312548	0.135727	-2.30277	0.0212918	0.0375432
yccA	255.99	-0.339911	0.147866	-2.29878	0.0215174	0.037906
treA	467.515	-0.255762	0.111287	-2.29822	0.0215493	0.0379432
sra	86.803	-0.5756	0.250571	-2.29715	0.0216103	0.0380316
[truncated: 1,519 more rows]

## Sheet: ValidationScreen_(even)
gene	baseMean	log2FoldChange	lfcSE	stat	pvalue	padj
ompR	4087.7	7.02936	0.159727	44.0085	6.06e-172	6.9e-169
polA	1574.87	4.20525	0.115465	36.4202	2.04e-290	3.3e-287
crr	745.297	5.46047	0.153217	35.6387	3.52e-278	3.8e-275
yfcC	1522.54	3.93351	0.113758	34.5778	5.46e-262	4.42e-259
chpR	1681.5	3.82715	0.113233	33.7988	2.06e-250	1.33e-247
poxA	4620.54	5.11435	0.151532	33.751	1.03e-249	5.58e-247
rnhA	637.75	4.89603	0.147251	33.2496	2.07e-242	9.56e-240
rfaG	1378.68	3.7374	0.112949	33.0892	4.25e-240	1.72e-237
sodA	604.652	4.88571	0.149542	32.6711	4.02e-234	1.45e-231
btuB	3231.27	4.1708	0.129424	32.2259	7.66e-228	2.48e-225
nadC	602.24	6.61917	0.212909	31.0892	3.37e-212	9.92e-210
trkA	1168.78	3.4003	0.112245	30.2937	1.39e-201	3.75e-199
speD	1733.52	3.18603	0.110763	28.7643	6e-182	1.49e-179
hupA	1219.78	-3.28477	0.115936	-28.3326	1.37e-176	3.17e-174
uraA	933.208	3.05864	0.113228	27.0131	1.04e-160	2.24e-158
glgA	1564.9	2.95632	0.109474	27.0048	1.3e-160	2.63e-158
chpS	508.78	3.67995	0.136991	26.8628	5.98e-159	1.14e-156
rfaQ	4666.92	4	0.149525	26.7513	1.19e-157	2.15e-155
ihfB	384.037	6.13336	0.230052	26.6608	1.34e-156	2.29e-154
udk	1716.22	2.89387	0.109824	26.35	5.13e-153	8.3e-151
atpG	6451.89	4.59098	0.174968	26.239	9.55e-152	1.47e-149
yihP	5075.15	4.06338	0.15547	26.1362	1.42e-150	2.08e-148
cyaA	810.639	3.00513	0.11559	25.9982	5.19e-149	7.3e-147
nadB	389.369	6.53424	0.252696	25.8581	1.97e-147	2.66e-145
atpC	6702.19	4.35653	0.177876	24.4919	1.8e-132	2.33e-130
slyD	12658.8	5.59997	0.237701	23.5588	1.02e-122	1.27e-120
asnC	1659.43	2.54798	0.108744	23.4311	2.06e-121	2.47e-119
rng	913.225	2.61228	0.11152	23.4243	2.42e-121	2.8e-119
nagD	2884.05	2.81546	0.121844	23.1071	3.93e-118	4.38e-116
phoR	808.631	2.55541	0.113423	22.5298	2.12e-112	2.28e-110
fadR	4981.37	3.36403	0.153305	21.9434	1e-106	1.04e-104
ybfE	18931.9	6.06549	0.278729	21.7612	5.41e-105	5.47e-103
gshB	1029.49	2.27172	0.108896	20.8614	1.2e-96	1.18e-94
yohK	28054.5	6.76551	0.327158	20.6797	5.28e-95	5.03e-93
ptsI	240.357	6.50585	0.315505	20.6205	1.8e-94	1.66e-92
rfaY	788.435	2.3206	0.113013	20.5339	1.07e-93	9.64e-92
sapB	516.292	2.55502	0.126224	20.2419	4.18e-91	3.66e-89
ycfM	1796.84	-2.23044	0.110471	-20.1902	1.19e-90	1.02e-88
sucB	2369.53	2.28738	0.114416	19.9918	6.5e-89	5.39e-87
nagA	261.82	-4.24915	0.213868	-19.8681	7.68e-88	6.22e-86
trkH	1604.18	2.11291	0.107702	19.6181	1.08e-85	8.56e-84
yzfA	1763.2	2.11862	0.10854	19.5193	7.53e-85	5.8e-83
thiE	181.387	5.18833	0.265925	19.5105	8.93e-85	6.73e-83
sapD	443.544	2.53323	0.132226	19.1584	8.24e-82	6.07e-80
nmpC	1934.5	2.09451	0.109749	19.0846	3.39e-81	2.44e-79
hupB	801.39	-2.17701	0.115343	-18.8743	1.86e-79	1.31e-77
sapF	486.712	2.40424	0.127598	18.8423	3.4e-79	2.34e-77
ptsN	3231.73	2.33932	0.126354	18.514	1.59e-76	1.07e-74
priA	20725.9	5.32432	0.288552	18.4519	5.04e-76	3.33e-74
ubiD	223.795	3.3431	0.184536	18.1162	2.37e-73	1.54e-71
mioC	4490.88	2.61625	0.145503	17.9807	2.76e-72	1.75e-70
rhlB	801.83	-2.05186	0.114731	-17.8842	1.57e-71	9.75e-70
ytfP	1288.72	1.88142	0.106802	17.6159	1.86e-69	1.14e-67
fruB	637.264	1.98181	0.116835	16.9625	1.56e-64	9.33e-63
ygdL	1085.13	-1.81103	0.109256	-16.576	1.04e-61	6.11e-60
yigL	1731.81	1.7512	0.107892	16.2311	3.04e-59	1.76e-57
sdaC	215.925	-3.22455	0.200577	-16.0764	3.74e-58	2.12e-56
panD	187.102	3.10893	0.196998	15.7815	4.17e-56	2.33e-54
rfaF	129.579	6.2647	0.402381	15.5691	1.18e-54	6.48e-53
secB	1047.34	1.66321	0.107405	15.4855	4.35e-54	2.35e-52
fruK	266.871	-2.64659	0.170997	-15.4774	4.93e-54	2.62e-52
cysA	700.566	1.76129	0.11382	15.4744	5.17e-54	2.7e-52
pnp	237.006	-2.82469	0.183541	-15.39	1.91e-53	9.81e-52
cysP	1343.46	1.62157	0.106414	15.2384	1.97e-52	9.95e-51
atpA	9346.76	3.13789	0.207619	15.1137	1.32e-51	6.55e-50
panE	152.466	3.34435	0.222199	15.0512	3.39e-51	1.66e-49
csdA	910.57	-1.64241	0.110724	-14.8334	8.91e-50	4.31e-48
ytfN	413.203	-2.03384	0.137302	-14.8129	1.21e-49	5.75e-48
exbB	371.209	2.04099	0.137859	14.8048	1.36e-49	6.4e-48
prfC	663.479	1.69226	0.114979	14.7179	4.94e-49	2.29e-47
cyaY	767.956	1.61518	0.111563	14.4777	1.68e-47	7.64e-46
fadA	1153.16	1.53659	0.106634	14.4099	4.48e-47	2.02e-45
ihfA	100.326	5.60327	0.38933	14.3921	5.8e-47	2.57e-45
ruvA	218.053	-2.67229	0.18792	-14.2204	6.85e-46	3e-44
malG	1818.57	1.53527	0.108272	14.1798	1.22e-45	5.28e-44
ymfL	265.793	-2.35932	0.167372	-14.0962	4.01e-45	1.71e-43
gpmA	167.986	2.85681	0.203748	14.0213	1.15e-44	4.85e-43
nupC	159144	9.16872	0.655134	13.9952	1.67e-44	6.92e-43
glgX	2467.07	1.59925	0.115043	13.9013	6.22e-44	2.55e-42
cysU	1189.15	1.47553	0.106435	13.8632	1.06e-43	4.28e-42
trxA	548.866	1.64553	0.120281	13.6807	1.32e-42	5.29e-41
mdtK	122.831	-4.12436	0.301869	-13.6627	1.69e-42	6.69e-41
yrbA	1226.04	1.45236	0.106318	13.6606	1.75e-42	6.81e-41
acnB	917.469	1.47411	0.10847	13.5899	4.6e-42	1.77e-40
ygdK	518.191	-1.69978	0.125407	-13.5542	7.49e-42	2.85e-40
rimI	194.655	-2.67834	0.198427	-13.4979	1.61e-41	6.06e-40
nadA	90.9588	5.94527	0.442924	13.4228	4.45e-41	1.66e-39
hepA	2637.64	-1.56949	0.117891	-13.313	1.94e-40	7.15e-39
pta	91.0221	4.21564	0.317604	13.2733	3.31e-40	1.2e-38
fadL	232.876	-2.34268	0.177226	-13.2186	6.85e-40	2.47e-38
recF	2678.94	1.53404	0.117856	13.0162	9.9e-39	3.52e-37
damX	984.636	-1.41443	0.109045	-12.9711	1.78e-38	6.28e-37
yqaB	603.013	1.51109	0.11711	12.9032	4.32e-38	1.5e-36
purR	163.875	-2.79265	0.218166	-12.8006	1.63e-37	5.61e-36
yieP	98067.4	6.94681	0.543415	12.7836	2.02e-37	6.9e-36
icd	160.329	2.61686	0.205409	12.7397	3.56e-37	1.2e-35
yadE	80.0594	4.32976	0.342705	12.6341	1.37e-36	4.57e-35
rumA	2134.78	1.40209	0.111011	12.6302	1.44e-36	4.75e-35
sapC	183.508	2.39462	0.189824	12.615	1.75e-36	5.71e-35
yqiC	334.346	1.79051	0.142188	12.5926	2.32e-36	7.51e-35
yfeC	491.223	-1.58895	0.126843	-12.5269	5.32e-36	1.71e-34
rnb	618.112	1.4511	0.116267	12.4808	9.51e-36	3.02e-34
cyoE	5389.48	1.94531	0.158444	12.2777	1.19e-34	3.75e-33
rfaI	700.926	1.3835	0.113041	12.239	1.93e-34	5.99e-33
truB	1189.64	1.29488	0.106236	12.1887	3.57e-34	1.1e-32
speE	156.553	2.49336	0.206219	12.0908	1.18e-33	3.61e-32
exbD	253.272	1.92828	0.160229	12.0346	2.34e-33	7.08e-32
pyrI	206.949	-2.18714	0.185132	-11.814	3.31e-32	9.91e-31
cyoC	8535.16	2.34582	0.198756	11.8025	3.79e-32	1.13e-30
atpE	5248.03	1.84346	0.15637	11.7891	4.44e-32	1.31e-30
sucD	1221.17	1.24719	0.10612	11.7527	6.84e-32	2e-30
ptsP	252.772	-1.91172	0.165924	-11.5217	1.03e-30	2.97e-29
yqgC	191.659	-2.21292	0.192309	-11.5071	1.22e-30	3.48e-29
rssA	607.96	-1.36171	0.118623	-11.4793	1.68e-30	4.76e-29
cyoD	6215.03	1.94122	0.170006	11.4186	3.38e-30	9.51e-29
yigB	777.229	1.25838	0.11073	11.3644	6.29e-30	1.76e-28
yqiB	1182.86	1.20487	0.106174	11.3482	7.57e-30	2.1e-28
trxB	393.392	1.50667	0.132878	11.3388	8.43e-30	2.31e-28
sixA	1013.68	1.20978	0.107066	11.2994	1.32e-29	3.59e-28
speA	101.044	-3.28604	0.292524	-11.2334	2.79e-29	7.54e-28
dedD	79.1993	-4.7601	0.424595	-11.2109	3.6e-29	9.65e-28
yohJ	125335	6.64911	0.597923	11.1203	9.99e-29	2.65e-27
cyoA	5646.3	1.79892	0.162076	11.0992	1.27e-28	3.33e-27
bioA	61.0139	4.37137	0.394194	11.0894	1.41e-28	3.69e-27
malE	3660.38	1.46749	0.132367	11.0865	1.46e-28	3.78e-27
ndk	114.569	2.65936	0.242904	10.9482	6.78e-28	1.74e-26
yifE	490.677	-1.37433	0.125897	-10.9164	9.63e-28	2.45e-26
ybjQ	683.97	-1.25422	0.115089	-10.8978	1.18e-27	2.99e-26
bioH	56.0485	5.4469	0.500733	10.8779	1.47e-27	3.69e-26
deaD	708.474	1.21973	0.112516	10.8405	2.21e-27	5.51e-26
rplI	170.39	2.09984	0.19404	10.8217	2.72e-27	6.72e-26
bioF	56.2587	4.50735	0.418847	10.7613	5.24e-27	1.29e-25
ubiF	55.481	4.64252	0.431742	10.753	5.74e-27	1.4e-25
greA	73.4372	-4.31764	0.402497	-10.7271	7.59e-27	1.83e-25
mraW	91.9411	-3.23485	0.30489	-10.6099	2.68e-26	6.43e-25
tig	277.242	-1.65732	0.157262	-10.5386	5.73e-26	1.37e-24
ybjG	384.96	1.40526	0.133581	10.5199	6.99e-26	1.65e-24
yfaE	530.53	1.25193	0.120484	10.3908	2.73e-25	6.41e-24
hslO	1495.82	1.09843	0.106225	10.3406	4.62e-25	1.08e-23
ycaJ	1542.85	1.09617	0.10639	10.3033	6.81e-25	1.57e-23
bglH	2033.07	1.12686	0.109848	10.2584	1.09e-24	2.49e-23
yraM	404.34	-1.37353	0.134028	-10.2481	1.21e-24	2.75e-23
yihG	1396.83	1.07044	0.105968	10.1015	5.44e-24	1.23e-22
iscU	130.761	2.2469	0.222509	10.098	5.64e-24	1.27e-22
kdsC	2066.81	1.11213	0.110173	10.0944	5.85e-24	1.31e-22
prpB	178.815	1.88125	0.187948	10.0094	1.39e-23	3.07e-22
pstS	187.079	1.83021	0.183617	9.96753	2.11e-23	4.66e-22
fadB	1169.25	1.05569	0.106097	9.95025	2.52e-23	5.5e-22
yicN	2157.22	1.09693	0.111102	9.87315	5.44e-23	1.18e-21
atpF	4987.74	1.50425	0.152477	9.86546	5.88e-23	1.27e-21
rhoL	1731.32	1.05644	0.107363	9.8399	7.58e-23	1.63e-21
thiH	500.274	1.19291	0.122407	9.74545	1.93e-22	4.11e-21
glnD	273.204	1.48928	0.153065	9.72974	2.25e-22	4.77e-21
xylA	2473.57	1.11014	0.114901	9.66168	4.39e-22	9.22e-21
panF	1566.02	1.02731	0.106451	9.65052	4.89e-22	1.02e-20
pck	1140.17	1.0238	0.106177	9.64239	5.29e-22	1.1e-20
rbsB	1715.83	1.01575	0.107247	9.47112	2.77e-21	5.71e-20
cysW	250.723	1.50458	0.158872	9.47039	2.79e-21	5.71e-20
citF	1914.37	1.02927	0.108727	9.46652	2.89e-21	5.89e-20
glpF	1825.22	1.02196	0.108008	9.46193	3.02e-21	6.12e-20
bioC	48.9288	3.80781	0.406899	9.35813	8.12e-21	1.63e-19
rssB	127.304	-2.19463	0.234785	-9.34739	8.98e-21	1.8e-19
dctA	1635.73	0.997311	0.106774	9.34043	9.59e-21	1.91e-19
recT	138.371	-2.08593	0.223553	-9.3308	1.05e-20	2.07e-19
rluC	102.109	-2.48574	0.267492	-9.29276	1.5e-20	2.95e-19
dgkA	292.511	1.37852	0.148415	9.28829	1.57e-20	3.06e-19
uspA	1156.61	0.984167	0.10609	9.27675	1.75e-20	3.39e-19
phnJ	459.959	1.15638	0.125429	9.21936	2.99e-20	5.76e-19
zntA	174.619	1.73594	0.189283	9.17114	4.68e-20	8.97e-19
rffT	2641.16	1.06972	0.11715	9.13121	6.77e-20	1.29e-18
fabF	95.1217	-2.53719	0.278162	-9.12125	7.43e-20	1.41e-18
mtlD	1763.89	0.975805	0.107546	9.07335	1.15e-19	2.17e-18
pstB	46.0519	3.80348	0.419423	9.06836	1.21e-19	2.26e-18
nuoC	651.722	1.03498	0.114236	9.05997	1.3e-19	2.43e-18
yjcD	1963.88	0.98324	0.109144	9.00863	2.09e-19	3.86e-18
dppB	2072.54	0.989553	0.110183	8.98097	2.68e-19	4.94e-18
nuoN	612.872	1.04031	0.115849	8.97981	2.71e-19	4.96e-18
hscB	176.809	1.67973	0.187784	8.94504	3.72e-19	6.76e-18
rraA	1987.91	0.976478	0.109361	8.92892	4.3e-19	7.78e-18
yifN	1510	0.947798	0.106196	8.92496	4.46e-19	8.02e-18
gltP	2378.04	1.01383	0.113645	8.92102	4.62e-19	8.27e-18
queA	625.513	-1.03898	0.116787	-8.89634	5.77e-19	1.03e-17
fkpA	1889.31	0.962452	0.108492	8.87114	7.24e-19	1.28e-17
smtA	190.786	-1.64814	0.186148	-8.85395	8.45e-19	1.49e-17
yeeO	85.6268	-2.57849	0.293675	-8.78009	1.63e-18	2.86e-17
yieL	3716.37	1.16878	0.133148	8.77805	1.66e-18	2.9e-17
fdoG	1537.03	0.928948	0.106287	8.73998	2.33e-18	4.04e-17
yiiX	1002.05	-0.935808	0.107832	-8.67842	4.01e-18	6.91e-17
yhhK	50.662	3.28739	0.378987	8.67415	4.17e-18	7.14e-17
pepA	1081.3	0.921313	0.106379	8.66069	4.69e-18	7.99e-17
aroC	41.1869	3.85087	0.445402	8.64584	5.34e-18	9.05e-17
yjaH	1504.34	-0.91882	0.106745	-8.60765	7.46e-18	1.26e-16
ycaN	185.045	-1.60983	0.188521	-8.53929	1.35e-17	2.27e-16
lpp	73.3425	-2.7458	0.321736	-8.53433	1.41e-17	2.35e-16
nudF	756.25	0.941803	0.110883	8.4937	2e-17	3.32e-16
yicC	899.768	0.912877	0.108084	8.446	3.01e-17	4.98e-16
mdoG	905.577	-0.91608	0.10895	-8.40829	4.16e-17	6.84e-16
ilvE	4125.02	1.1658	0.139412	8.36229	6.15e-17	1.01e-15
entB	719.262	0.93506	0.111884	8.35737	6.41e-17	1.04e-15
pdxK	2344.44	0.940162	0.113207	8.30481	1e-16	1.62e-15
yejK	291.456	-1.2459	0.151234	-8.23821	1.75e-16	2.82e-15
bcp	365.862	-1.1333	0.137751	-8.22718	1.92e-16	3.07e-15
yfaL	284.048	-1.25462	0.152882	-8.2065	2.28e-16	3.63e-15
yigE	467.812	1.01662	0.124556	8.16197	3.3e-16	5.23e-15
ydhB	123.783	-1.90174	0.233371	-8.14901	3.67e-16	5.8e-15
panB	31.7679	4.51733	0.555265	8.13545	4.1e-16	6.45e-15
yihV	2419.42	0.921226	0.114143	8.07084	6.98e-16	1.09e-14
yciQ	338.465	-1.14508	0.141895	-8.06991	7.04e-16	1.1e-14
yieG	1280.14	0.843419	0.105785	7.97296	1.55e-15	2.4e-14
yfcF	101.805	-2.06528	0.259488	-7.95908	1.73e-15	2.67e-14
grxC	2564.24	0.923624	0.116058	7.95827	1.74e-15	2.68e-14
priC	1895.54	0.855442	0.108508	7.8837	3.18e-15	4.85e-14
yebZ	1615.6	0.839091	0.106604	7.87109	3.52e-15	5.34e-14
rbsC	2219.18	0.872342	0.111714	7.80872	5.78e-15	8.74e-14
yciB	110.552	-1.92276	0.247241	-7.77684	7.44e-15	1.12e-13
metL	1055.43	-0.832607	0.107231	-7.76463	8.19e-15	1.23e-13
fruA	600.253	0.899636	0.116252	7.7387	1e-14	1.5e-13
rhtB	1079.44	0.82148	0.106333	7.72557	1.11e-14	1.65e-13
aceF	54.1987	8.12168	1.05155	7.72356	1.13e-14	1.67e-13
nagB	1887.73	0.836511	0.108437	7.71424	1.22e-14	1.79e-13
rhtC	1404.83	0.816585	0.105859	7.71386	1.22e-14	1.79e-13
yehD	698.624	-0.874221	0.113557	-7.69852	1.38e-14	2.01e-13
yiiS	2160.36	0.851573	0.111058	7.66783	1.75e-14	2.54e-13
cbrC	930.879	0.824395	0.107626	7.65984	1.86e-14	2.69e-13
ycjV	866.497	-0.837536	0.109419	-7.6544	1.94e-14	2.79e-13
yicH	1774.12	0.822068	0.107563	7.64267	2.13e-14	3.05e-13
ycbC	128.942	-1.72717	0.226396	-7.62898	2.37e-14	3.38e-13
nuoG	720.466	0.852475	0.111775	7.62674	2.41e-14	3.42e-13
ygaH	496.139	-0.942703	0.123857	-7.61124	2.71e-14	3.84e-13
phnK	2493.14	0.874669	0.115094	7.59961	2.97e-14	4.18e-13
fsaB	1817.46	0.819376	0.107878	7.5954	3.07e-14	4.3e-13
rbsA	1906.87	0.822992	0.108595	7.57851	3.5e-14	4.88e-13
yhiR	1020.85	0.808512	0.106715	7.57638	3.55e-14	4.94e-13
yggW	350.868	1.03932	0.137338	7.56755	3.8e-14	5.26e-13
cysN	90.8271	-2.0786	0.274907	-7.5611	4e-14	5.51e-13
pabC	34.4193	-8.19257	1.08772	-7.53186	5e-14	6.86e-13
ptsA	2012.35	0.825005	0.109545	7.53119	5.03e-14	6.87e-13
gltS	3594.91	0.987477	0.131252	7.5235	5.33e-14	7.26e-13
rbsK	1676.26	0.802739	0.106927	7.50732	6.03e-14	8.18e-13
yeiN	227.959	-1.2619	0.168335	-7.49634	6.56e-14	8.85e-13
udp	704.821	0.83957	0.112231	7.48074	7.39e-14	9.93e-13
ydhD	103.495	1.83566	0.245535	7.47613	7.65e-14	1.02e-12
argB	2777.68	0.882717	0.119022	7.41643	1.2e-13	1.6e-12
bglB	1343.95	0.782756	0.105766	7.4008	1.35e-13	1.8e-12
hslV	1981.61	0.80597	0.109252	7.37714	1.62e-13	2.14e-12
ilvD	1911.74	0.798461	0.10863	7.35026	1.98e-13	2.6e-12
yidJ	4725.07	1.09062	0.148498	7.34437	2.07e-13	2.71e-12
ydcF	916.944	-0.797072	0.108569	-7.3416	2.11e-13	2.76e-12
hslR	1246.1	0.774691	0.105783	7.32336	2.42e-13	3.14e-12
yihF	964.243	0.784904	0.107219	7.32055	2.47e-13	3.2e-12
yfgC	60.3015	-2.54214	0.347456	-7.31643	2.55e-13	3.29e-12
glnK	259.115	-1.1531	0.158443	-7.27769	3.4e-13	4.36e-12
phnG	1276.19	0.768776	0.105755	7.26938	3.61e-13	4.62e-12
yigZ	1611.16	0.773251	0.106562	7.25635	3.98e-13	5.07e-12
astA	477.313	-0.903792	0.12518	-7.21992	5.2e-13	6.61e-12
fdhE	1810.16	0.778163	0.107812	7.21779	5.28e-13	6.68e-12
metB	1673.47	0.771004	0.1069	7.21241	5.5e-13	6.93e-12
mltC	452.425	-0.917324	0.127304	-7.20577	5.77e-13	7.24e-12
trpL	143.285	-1.53177	0.212815	-7.19766	6.13e-13	7.63e-12
yhdJ	2008.07	0.788155	0.109495	7.1981	6.11e-13	7.63e-12
serB	170.121	1.36548	0.189795	7.19449	6.27e-13	7.78e-12
radA	2168.45	0.798674	0.111133	7.18664	6.64e-13	8.21e-12
phnM	1551.76	0.76243	0.106284	7.1735	7.31e-13	9e-12
hscA	95.2044	1.82963	0.255541	7.15982	8.08e-13	9.91e-12
ade	2645.04	0.837244	0.117148	7.14691	8.88e-13	1.08e-11
metR	1047.51	0.760255	0.106502	7.1384	9.44e-13	1.15e-11
sufI	403.069	-0.94271	0.132321	-7.12442	1.05e-12	1.27e-11
yagR	508.797	0.856539	0.12134	7.05898	1.68e-12	2.03e-11
frwC	2041.73	0.773204	0.109816	7.04091	1.91e-12	2.3e-11
yjaG	1839.1	0.75986	0.108028	7.03393	2.01e-12	2.41e-11
ompL	1581.3	0.744395	0.106411	6.99547	2.64e-12	3.16e-11
mdoH	1259.06	-0.741468	0.106308	-6.97473	3.06e-12	3.65e-11
yihD	1096.8	0.739669	0.106213	6.96402	3.31e-12	3.92e-11
yihN	1420.17	0.736135	0.10586	6.95385	3.55e-12	4.2e-11
treF	951.226	0.746078	0.107335	6.95093	3.63e-12	4.27e-11
yrfA	2080.16	0.76309	0.110196	6.92481	4.37e-12	5.12e-11
bglG	1169.81	0.73348	0.105929	6.92428	4.38e-12	5.12e-11
gpt	249.14	1.09347	0.158031	6.91935	4.54e-12	5.27e-11
rhaS	1532.34	0.734815	0.106199	6.91921	4.54e-12	5.27e-11
pabA	84.0555	-1.95816	0.283115	-6.91649	4.63e-12	5.33e-11
yhbH	468.579	-0.87001	0.125782	-6.91683	4.62e-12	5.33e-11
nlpI	57.4539	-2.43449	0.352502	-6.90631	4.97e-12	5.71e-11
arsB	691.186	0.777746	0.112639	6.90478	5.03e-12	5.75e-11
thiG	370.709	0.927751	0.134454	6.90012	5.2e-12	5.92e-11
yiiG	1729.65	0.739682	0.107239	6.89752	5.29e-12	6.01e-11
hofQ	3685.49	0.914696	0.13263	6.89662	5.33e-12	6.03e-11
ilvY	905.389	0.743141	0.107907	6.88688	5.7e-12	6.42e-11
yiaT	1271.05	0.728228	0.105744	6.88672	5.71e-12	6.42e-11
yifO	1487.65	0.730136	0.10604	6.88551	5.76e-12	6.45e-11
lldD	1523.96	0.72925	0.106167	6.86889	6.47e-12	7.22e-11
rhaB	1532.2	0.725896	0.106197	6.83535	8.18e-12	9.1e-11
ydhQ	51.1989	-2.5768	0.377497	-6.826	8.73e-12	9.68e-11
yfcN	137.303	-1.47185	0.216711	-6.79177	1.11e-11	1.22e-10
fimA	910.545	0.731874	0.107833	6.78712	1.14e-11	1.26e-10
phnI	1607.09	0.722318	0.106528	6.78052	1.2e-11	1.31e-10
yidK	3457.71	0.871542	0.129137	6.74899	1.49e-11	1.63e-10
mrcB	139.295	-1.45188	0.215148	-6.74829	1.5e-11	1.63e-10
bax	1332.91	0.711068	0.105737	6.72488	1.76e-11	1.91e-10
mrp	341.873	0.930905	0.138509	6.72092	1.81e-11	1.96e-10
hokA	1613.2	0.71598	0.106558	6.71918	1.83e-11	1.97e-10
entE	538.779	0.801964	0.119388	6.71729	1.85e-11	1.99e-10
yahM	276.55	1.01337	0.150941	6.71364	1.9e-11	2.04e-10
yajR	4083.58	0.928908	0.138741	6.69526	2.15e-11	2.3e-10
bcsG	1612.31	0.713279	0.106551	6.69424	2.17e-11	2.31e-10
yieN	1789.7	0.720303	0.107649	6.69119	2.21e-11	2.35e-10
yiiR	2196.43	0.744577	0.11143	6.68204	2.36e-11	2.49e-10
recJ	762.821	-0.744429	0.11144	-6.68006	2.39e-11	2.52e-10
dcuA	1747.44	0.716946	0.107352	6.67846	2.41e-11	2.53e-10
fiu	899.94	0.721051	0.107967	6.67843	2.42e-11	2.53e-10
agaR	700.849	0.747698	0.112302	6.65792	2.78e-11	2.9e-10
yieH	649.654	0.759057	0.114077	6.65388	2.85e-11	2.97e-10
ilvL	3191.92	0.83083	0.125102	6.64124	3.11e-11	3.23e-10
yfgD	74.4337	-1.99698	0.300786	-6.63919	3.15e-11	3.26e-10
aphA	1187.91	0.702221	0.105864	6.63325	3.28e-11	3.39e-10
ptsG	392.497	0.872289	0.131681	6.62425	3.49e-11	3.59e-10
thrC	3249.29	0.832172	0.125966	6.60634	3.94e-11	4.04e-10
nikC	571.83	0.776227	0.117554	6.60315	4.02e-11	4.11e-10
ugpC	947.38	0.707517	0.107368	6.58968	4.41e-11	4.49e-10
miaB	915.455	-0.713639	0.108463	-6.57954	4.72e-11	4.79e-10
yhjG	1852.68	0.711278	0.108124	6.57834	4.76e-11	4.81e-10
ybaN	1752.05	0.702042	0.107379	6.538	6.23e-11	6.29e-10
atpI	1237.09	0.690389	0.10577	6.52728	6.7e-11	6.73e-10
sbp	2828.37	0.781413	0.119731	6.52642	6.74e-11	6.75e-10
fdx	68.0798	1.96746	0.30178	6.51951	7.05e-11	7.05e-10
hslU	2134.57	0.721802	0.110754	6.51719	7.16e-11	7.14e-10
ysaB	1359.86	0.688876	0.105751	6.51415	7.31e-11	7.26e-10
ydjI	1495.34	-0.692345	0.106482	-6.50199	7.93e-11	7.85e-10
fadD	82.9726	-1.83693	0.28265	-6.49894	8.09e-11	7.99e-10
yihX	941.084	0.697883	0.107437	6.49573	8.26e-11	8.13e-10
yhbE	2794.53	0.773434	0.119244	6.48616	8.81e-11	8.64e-10
aslA	1344.08	0.685274	0.105738	6.48086	9.12e-11	8.92e-10
yciI	201.014	-1.15162	0.177714	-6.4802	9.16e-11	8.93e-10
cdh	2182.97	0.719769	0.111276	6.46829	9.91e-11	9.64e-10
yibN	2143.24	0.714752	0.110844	6.44825	1.13e-10	1.1e-09
ugpE	1112.79	0.683267	0.106115	6.43893	1.2e-10	1.16e-09
cedA	242.811	-1.04421	0.16239	-6.43024	1.27e-10	1.23e-09
cysJ	43.6235	-2.64514	0.411711	-6.42474	1.32e-10	1.27e-09
wzxC	650.638	-0.73507	0.114981	-6.39297	1.63e-10	1.56e-09
yhdL	2234.71	0.715016	0.111857	6.39222	1.63e-10	1.56e-09
metE	1402.9	0.674489	0.10581	6.37452	1.84e-10	1.75e-09
yidA	1407.24	0.67389	0.105818	6.36838	1.91e-10	1.81e-09
kdgK	1067.07	0.676921	0.106346	6.36525	1.95e-10	1.85e-09
arsC	1584.15	0.67509	0.106407	6.34443	2.23e-10	2.11e-09
rffA	422.832	0.81359	0.128357	6.33849	2.32e-10	2.18e-09
trpC	53.4807	2.16816	0.342665	6.32736	2.49e-10	2.34e-09
yhjJ	1811	0.682006	0.107796	6.32683	2.5e-10	2.34e-09
panC	35.6038	2.71447	0.430649	6.3032	2.92e-10	2.72e-09
rarD	1217.03	0.666197	0.105792	6.29725	3.03e-10	2.82e-09
bcsZ	1174.08	0.666778	0.105895	6.29662	3.04e-10	2.82e-09
yibJ	735.691	0.700102	0.111259	6.29256	3.12e-10	2.89e-09
dgoR	2128.3	0.69563	0.110683	6.28489	3.28e-10	3.03e-09
yiaF	1753.85	0.674453	0.107386	6.28063	3.37e-10	3.1e-09
yjeF	117.909	1.42953	0.227676	6.2788	3.41e-10	3.13e-09
mog	707.779	0.703425	0.112059	6.27726	3.45e-10	3.15e-09
frvB	1363.16	0.663197	0.105749	6.2714	3.58e-10	3.26e-09
mutM	2594.75	0.729743	0.116437	6.26727	3.67e-10	3.34e-09
ilvA	795.482	0.687622	0.109808	6.26203	3.8e-10	3.45e-09
yibG	2517.21	0.722167	0.115387	6.25866	3.88e-10	3.51e-09
speF	644.401	-0.720009	0.115189	-6.25069	4.09e-10	3.69e-09
cpxR	2843.84	0.749478	0.119949	6.2483	4.15e-10	3.73e-09
mprA	915.901	-0.677014	0.108418	-6.24447	4.25e-10	3.81e-09
katG	1967.56	0.680305	0.109097	6.23578	4.5e-10	4.01e-09
pflC	2060.97	0.685875	0.109989	6.23587	4.49e-10	4.01e-09
yciV	907.162	-0.676615	0.108514	-6.23526	4.51e-10	4.01e-09
trmA	3326.98	0.792659	0.127137	6.2347	4.53e-10	4.02e-09
glnE	96.6255	-1.61565	0.259395	-6.22853	4.71e-10	4.17e-09
aceK	1423.43	0.658957	0.105846	6.22564	4.8e-10	4.23e-09
yeeX	47.4773	-2.39745	0.385661	-6.21647	5.08e-10	4.47e-09
fpr	1550.95	0.659923	0.106257	6.21064	5.28e-10	4.63e-09
qor	2479.46	0.713167	0.114883	6.20776	5.37e-10	4.7e-09
apaH	473.491	0.767929	0.123811	6.20241	5.56e-10	4.85e-09
yjjY	22.8193	6.87453	1.10889	6.19947	5.67e-10	4.93e-09
ilvM	2601.94	0.722136	0.116535	6.19673	5.76e-10	5e-09
frwD	1667.13	0.661696	0.106837	6.19352	5.88e-10	5.09e-09
uhpC	1709.08	0.662352	0.107091	6.18496	6.21e-10	5.36e-09
yahK	307.423	0.891201	0.14425	6.17819	6.48e-10	5.58e-09
slp	810.286	0.674231	0.109475	6.15874	7.33e-10	6.3e-09
yicE	3393.75	0.788785	0.128151	6.15512	7.5e-10	6.43e-09
thiD	19.7014	4.01969	0.656081	6.12683	8.96e-10	7.66e-09
yieF	4087.28	0.849579	0.138789	6.12137	9.28e-10	7.91e-09
dhaK	74.9835	1.74797	0.28579	6.11626	9.58e-10	8.14e-09
cchB	96.1135	-1.58729	0.259674	-6.11264	9.8e-10	8.31e-09
hemN	1065.58	0.64955	0.106344	6.10798	1.01e-09	8.53e-09
phnF	2047.43	0.670631	0.109852	6.10484	1.03e-09	8.68e-09
yjeT	1608.22	0.650155	0.106518	6.10373	1.04e-09	8.71e-09
yigI	920.954	0.656427	0.107666	6.09689	1.08e-09	9.07e-09
ibpB	912.783	0.656975	0.107775	6.09579	1.09e-09	9.11e-09
rnd	33.8128	-2.91868	0.478931	-6.09416	1.1e-09	9.18e-09
hcaT	268.131	-0.944958	0.15509	-6.09296	1.11e-09	9.23e-09
yhfK	1359.41	0.643726	0.105738	6.08796	1.14e-09	9.49e-09
ypeC	808.53	0.666465	0.109509	6.08594	1.16e-09	9.59e-09
yidB	1008.51	0.649318	0.106751	6.08255	1.18e-09	9.77e-09
nac	340.798	-0.853551	0.140377	-6.08041	1.2e-09	9.88e-09
yhjY	893.922	0.653814	0.108036	6.05179	1.43e-09	1.18e-08
yidX	634.567	0.693468	0.11463	6.04963	1.45e-09	1.19e-08
yhbP	492.954	0.733746	0.122329	5.99815	2e-09	1.63e-08
gshA	461.497	-0.754773	0.126025	-5.98905	2.11e-09	1.72e-08
nikE	440.262	0.758284	0.126635	5.98794	2.13e-09	1.73e-08
dppD	1295.17	0.632314	0.105707	5.98173	2.21e-09	1.79e-08
yjcO	1134.39	0.634145	0.106014	5.98173	2.21e-09	1.79e-08
yhjE	1873.93	0.647095	0.108282	5.97604	2.29e-09	1.85e-08
rhaD	1238.47	0.631858	0.105752	5.97492	2.3e-09	1.85e-08
hdeA	1565.56	0.635148	0.106314	5.97427	2.31e-09	1.86e-08
yhjV	1142.54	0.630605	0.105982	5.95011	2.68e-09	2.15e-08
kdgT	1488.78	0.630591	0.106018	5.94797	2.71e-09	2.17e-08
yaiW	270.138	-0.91808	0.154423	-5.94524	2.76e-09	2.2e-08
ggt	1510.48	0.630255	0.106093	5.94056	2.84e-09	2.26e-08
yibH	997.307	0.634648	0.106837	5.94036	2.84e-09	2.26e-08
ybiX	234.163	0.962694	0.162211	5.93484	2.94e-09	2.33e-08
menA	1367.29	0.62625	0.105744	5.92233	3.17e-09	2.51e-08
entD	398.481	0.773842	0.130874	5.91287	3.36e-09	2.65e-08
tiaE	1267.3	0.623743	0.105716	5.90018	3.63e-09	2.85e-08
yoeF	507.146	-0.722185	0.122437	-5.89843	3.67e-09	2.88e-08
dgoD	779.332	0.64739	0.110148	5.87747	4.17e-09	3.26e-08
yegV	213.193	-1.00982	0.172143	-5.86619	4.46e-09	3.48e-08
yiaU	683.634	0.659478	0.112817	5.84556	5.05e-09	3.93e-08
ygiE	874.978	0.632326	0.108303	5.83848	5.27e-09	4.09e-08
yiiM	1494.68	0.618403	0.106036	5.83201	5.48e-09	4.24e-08
yijO	1481.82	0.61601	0.105994	5.81175	6.18e-09	4.78e-08
ybeZ	540.007	-0.698464	0.120286	-5.80671	6.37e-09	4.91e-08
yihL	1067.13	0.616673	0.106326	5.79982	6.64e-09	5.11e-08
oppF	291.182	-0.866085	0.149462	-5.79469	6.84e-09	5.25e-08
phnD	1875.66	0.627355	0.108294	5.79308	6.91e-09	5.29e-08
yjaB	1353.33	0.609995	0.105724	5.76968	7.94e-09	6.07e-08
metH	2167.51	0.64027	0.111095	5.76329	8.25e-09	6.28e-08
msyB	636.022	-0.663346	0.115423	-5.74708	9.08e-09	6.9e-08
ydjG	159.749	-1.13776	0.198485	-5.7322	9.91e-09	7.52e-08
xylR	2490.33	0.658095	0.11502	5.72157	1.06e-08	7.98e-08
lipB	15.2821	5.27325	0.921845	5.72032	1.06e-08	8.02e-08
znuA	146.023	-1.18805	0.207833	-5.71637	1.09e-08	8.19e-08
helD	478.559	-0.711757	0.124539	-5.71515	1.1e-08	8.22e-08
yjfO	939.518	0.613991	0.107426	5.71548	1.09e-08	8.22e-08
yibA	1917.01	0.620541	0.108639	5.71195	1.12e-08	8.35e-08
yjbI	1823.48	0.6158	0.10788	5.70821	1.14e-08	8.52e-08
nuoM	242.123	0.91005	0.15968	5.69922	1.2e-08	8.96e-08
dadX	449.461	-0.723642	0.126989	-5.69846	1.21e-08	8.98e-08
yiiT	1885.87	0.6171	0.108376	5.69407	1.24e-08	9.19e-08
ugpQ	1192.05	0.6023	0.10583	5.69121	1.26e-08	9.33e-08
bcsE	830.696	0.619663	0.109061	5.68181	1.33e-08	9.83e-08
dcuR	1441.35	0.601269	0.105876	5.67899	1.35e-08	9.97e-08
dinF	1054.82	0.603591	0.106394	5.67316	1.4e-08	1.03e-07
aceA	1384.79	0.599797	0.105764	5.67111	1.42e-08	1.04e-07
ydcQ	62.1284	1.77716	0.313519	5.66844	1.44e-08	1.05e-07
yijE	2629.11	0.662543	0.116901	5.66755	1.45e-08	1.06e-07
tatA	2614.19	0.66099	0.116694	5.66428	1.48e-08	1.07e-07
yifL	984.921	0.605612	0.106947	5.66275	1.49e-08	1.08e-07
dbpA	381.24	-0.75936	0.134318	-5.65343	1.57e-08	1.14e-07
bcsF	981.265	0.604137	0.106973	5.64759	1.63e-08	1.18e-07
gntX	58.9804	1.81232	0.321745	5.63278	1.77e-08	1.28e-07
frwB	2256.45	0.630806	0.112095	5.62742	1.83e-08	1.32e-07
hfq	14.6179	5.17739	0.921087	5.62096	1.9e-08	1.36e-07
yhjB	2012.24	0.615465	0.109503	5.62052	1.9e-08	1.36e-07
rfaE	16.8105	6.41652	1.14303	5.61362	1.98e-08	1.42e-07
aceB	1129.03	0.595048	0.106026	5.61226	2e-08	1.42e-07
malP	482.6	0.690659	0.123061	5.61235	2e-08	1.42e-07
yidP	3404.92	0.719744	0.128314	5.60926	2.03e-08	1.44e-07
yhdT	1036.67	0.596526	0.106518	5.60022	2.14e-08	1.52e-07
dgoK	384.304	0.741451	0.132528	5.59467	2.21e-08	1.56e-07
argH	3330.59	0.711128	0.127182	5.59142	2.25e-08	1.59e-07
yhhA	891.901	0.603663	0.108047	5.58704	2.31e-08	1.63e-07
bcsB	1196.34	0.590799	0.105816	5.58325	2.36e-08	1.66e-07
frvX	1506.42	0.591321	0.106071	5.57475	2.48e-08	1.74e-07
gph	3599.64	0.731164	0.131292	5.56901	2.56e-08	1.79e-07
yijP	2462.99	0.638074	0.114657	5.56509	2.62e-08	1.83e-07
sgbU	1267.54	0.588212	0.105711	5.56433	2.63e-08	1.83e-07
pepQ	1900.14	0.603643	0.108493	5.56387	2.64e-08	1.83e-07
phnH	1932.11	0.604904	0.108769	5.56137	2.68e-08	1.85e-07
xylB	1801.67	0.599015	0.107712	5.56129	2.68e-08	1.85e-07
eptB	2445.53	0.636249	0.114428	5.56027	2.69e-08	1.86e-07
dhaH	329.606	-0.787868	0.141898	-5.55235	2.82e-08	1.94e-07
fhuE	1427.65	-0.589618	0.10622	-5.55093	2.84e-08	1.95e-07
dppF	947.08	0.595381	0.107331	5.54713	2.9e-08	1.99e-07
pflD	2333.85	0.625473	0.113017	5.53433	3.12e-08	2.14e-07
ycjT	220.209	-0.936177	0.16921	-5.53263	3.15e-08	2.15e-07
ybgT	21.9686	3.1114	0.562697	5.52944	3.21e-08	2.19e-07
glpX	991.872	0.589902	0.106877	5.51944	3.4e-08	2.31e-07
yiaH	2016.25	0.604092	0.10954	5.5148	3.49e-08	2.37e-07
yiaA	1330.06	0.582551	0.105702	5.51126	3.56e-08	2.41e-07
mdtF	1000.06	0.588486	0.106797	5.51033	3.58e-08	2.42e-07
yrbD	678.162	0.622157	0.11298	5.50678	3.65e-08	2.47e-07
yheS	997.119	0.587448	0.106829	5.49894	3.82e-08	2.57e-07
yiiL	997.983	0.587353	0.106817	5.49869	3.83e-08	2.57e-07
nlpA	3287.43	0.694674	0.126526	5.49035	4.01e-08	2.69e-07
yijF	1233.66	0.578876	0.105746	5.47422	4.39e-08	2.94e-07
yiiF	849.948	0.594998	0.108709	5.47333	4.42e-08	2.95e-07
nikB	620.277	0.630446	0.115208	5.47226	4.44e-08	2.96e-07
lldR	1465.89	0.579582	0.105941	5.47079	4.48e-08	2.98e-07
cpxA	63.984	-1.74317	0.318709	-5.46948	4.51e-08	2.99e-07
umuD	436.928	-0.700576	0.128093	-5.46928	4.52e-08	2.99e-07
yibF	2581.03	0.634074	0.116237	5.45499	4.9e-08	3.24e-07
sppA	163.798	-1.06571	0.195481	-5.45171	4.99e-08	3.29e-07
yhjX	1949.28	0.593553	0.108919	5.44949	5.05e-08	3.32e-07
yiaN	693.331	-0.616762	0.113265	-5.44532	5.17e-08	3.4e-07
cpdA	322.013	-0.779763	0.143221	-5.44448	5.2e-08	3.41e-07
dedA	192.336	-0.982094	0.18046	-5.44217	5.26e-08	3.44e-07
galU	14.0958	4.55897	0.838893	5.43451	5.49e-08	3.59e-07
argE	1410.32	0.574859	0.105802	5.43332	5.53e-08	3.6e-07
puuR	965.965	-0.584897	0.107661	-5.43274	5.55e-08	3.61e-07
yieM	3950.21	0.741987	0.136676	5.4288	5.67e-08	3.68e-07
sgbE	1129.69	0.575305	0.106022	5.42627	5.75e-08	3.73e-07
yegD	366.326	-0.738659	0.136193	-5.42362	5.84e-08	3.77e-07
rfbD	412.813	-0.70674	0.130548	-5.41365	6.18e-08	3.98e-07
hycA	675.074	0.61202	0.113078	5.41239	6.22e-08	4e-07
glgC	516.052	0.652998	0.12072	5.40921	6.33e-08	4.07e-07
yicI	2995.45	0.660335	0.122153	5.40581	6.45e-08	4.14e-07
sdaA	157.223	-1.07862	0.199707	-5.40099	6.63e-08	4.24e-07
yibI	1780.75	0.580698	0.107559	5.39888	6.71e-08	4.28e-07
tag	1592.44	0.5733	0.106426	5.38682	7.17e-08	4.57e-07
ysgA	885.537	0.582313	0.108132	5.3852	7.24e-08	4.6e-07
uhpB	2673.76	0.63265	0.117518	5.38343	7.31e-08	4.64e-07
ygfG	221.042	-0.908449	0.168778	-5.38251	7.35e-08	4.65e-07
yhdU	1752.73	0.572996	0.107361	5.3371	9.44e-08	5.97e-07
yahO	534.728	0.637709	0.119524	5.33542	9.53e-08	6.02e-07
cobT	169.298	-1.02458	0.192198	-5.33089	9.77e-08	6.16e-07
idnO	628.599	0.611042	0.114825	5.32149	1.03e-07	6.47e-07
yqaA	393.898	0.695811	0.131341	5.29773	1.17e-07	7.36e-07
melR	618.468	0.609584	0.115257	5.2889	1.23e-07	7.71e-07
selA	1627.08	0.563588	0.106601	5.2869	1.24e-07	7.78e-07
cmr	310.739	-0.767179	0.145199	-5.28362	1.27e-07	7.9e-07
xylG	1619.49	0.562669	0.10656	5.28032	1.29e-07	8.03e-07
gntU	475.085	0.652492	0.12362	5.27819	1.3e-07	8.11e-07
pdhR	655.132	0.599844	0.113791	5.27146	1.35e-07	8.4e-07
ampD	468.135	0.654239	0.124152	5.26966	1.37e-07	8.46e-07
fldB	556.976	0.622417	0.118265	5.26291	1.42e-07	8.76e-07
yjbF	1240.54	0.555213	0.105731	5.25118	1.51e-07	9.32e-07
livG	408.434	0.681039	0.129725	5.24989	1.52e-07	9.37e-07
yihW	780.272	0.577954	0.110102	5.24927	1.53e-07	9.38e-07
prkB	1203.45	0.552995	0.105795	5.22706	1.72e-07	1.06e-06
mobB	831.243	0.568812	0.109037	5.21669	1.82e-07	1.11e-06
metA	1611.22	0.55504	0.106517	5.21081	1.88e-07	1.15e-06
yihT	1310.79	0.5501	0.105694	5.20466	1.94e-07	1.19e-06
yiiD	1177.71	0.550366	0.105855	5.19923	2e-07	1.22e-06
cbrA	2431.71	0.59215	0.114244	5.18319	2.18e-07	1.33e-06
zwf	21.3684	2.91607	0.562798	5.18138	2.2e-07	1.34e-06
rmuC	1151.89	0.548271	0.105932	5.1757	2.27e-07	1.37e-06
ycfS	1127.44	-0.550809	0.106463	-5.17373	2.29e-07	1.39e-06
prlC	812.909	0.565694	0.10939	5.17134	2.32e-07	1.4e-06
ynfM	170.999	-0.987532	0.191073	-5.16835	2.36e-07	1.42e-06
yiaB	1178.71	0.546511	0.105852	5.16296	2.43e-07	1.46e-06
yhfY	1473.37	0.54535	0.105958	5.14687	2.65e-07	1.59e-06
proQ	44.6777	-1.98025	0.385423	-5.13787	2.78e-07	1.66e-06
fdhF	1448.2	0.543974	0.105885	5.13741	2.79e-07	1.66e-06
yrfB	2183.18	0.571218	0.111258	5.13417	2.83e-07	1.69e-06
slyB	233.579	-0.842809	0.164306	-5.1295	2.91e-07	1.73e-06
livF	533.579	0.612859	0.119595	5.12447	2.98e-07	1.77e-06
rsd	2701.66	0.604093	0.117906	5.12352	3e-07	1.78e-06
dinD	2107.99	0.565297	0.110451	5.11806	3.09e-07	1.82e-06
rbsD	3254.16	0.645004	0.126019	5.1183	3.08e-07	1.82e-06
dhaR	439.083	-0.653225	0.127768	-5.11259	3.18e-07	1.87e-06
rem	2737.92	-0.606191	0.118602	-5.11115	3.2e-07	1.89e-06
yiaG	3262.79	0.644093	0.126149	5.1058	3.29e-07	1.94e-06
frlC	1277.67	0.538534	0.105695	5.09517	3.48e-07	2.04e-06
glvB	3265.84	0.642684	0.126195	5.09278	3.53e-07	2.07e-06
glcE	1434.7	0.538622	0.105849	5.08858	3.61e-07	2.11e-06
gmhB	7.25846	6.67183	1.31131	5.08791	3.62e-07	2.11e-06
yihM	653.606	0.578769	0.113841	5.08402	3.7e-07	2.15e-06
narL	244.631	-0.816458	0.160823	-5.07674	3.84e-07	2.23e-06
yagM	221.64	-0.854724	0.168361	-5.07672	3.84e-07	2.23e-06
trmH	1909.09	0.550873	0.108564	5.0742	3.89e-07	2.25e-06
yiaJ	1861.56	0.54813	0.108169	5.06737	4.03e-07	2.33e-06
yicL	3254.54	0.63833	0.126024	5.06514	4.08e-07	2.36e-06
glpC	367.476	-0.686034	0.13593	-5.04697	4.49e-07	2.59e-06
dnaB	112.464	1.16749	0.23187	5.0351	4.78e-07	2.75e-06
yiaY	2498.25	0.578982	0.115117	5.02952	4.92e-07	2.82e-06
yigF	1041.08	0.535512	0.106474	5.02953	4.92e-07	2.82e-06
yiiU	1268.32	0.531566	0.105698	5.02911	4.93e-07	2.82e-06
ndh	113.136	1.16142	0.231083	5.02597	5.01e-07	2.86e-06
yihU	1245	0.530741	0.105723	5.02013	5.16e-07	2.94e-06
livH	424.051	0.641876	0.128088	5.01122	5.41e-07	3.08e-06
ygjK	922.554	0.539228	0.10762	5.01049	5.43e-07	3.08e-06
yheU	1699.91	0.535525	0.107013	5.00429	5.61e-07	3.18e-06
pepE	2154.7	0.554706	0.110945	4.99981	5.74e-07	3.25e-06
rfbX	231.207	-0.824712	0.164965	-4.99933	5.75e-07	3.25e-06
ygjF	1388.46	0.52867	0.105756	4.99895	5.76e-07	3.25e-06
yliB	250.095	-0.795264	0.15923	-4.99444	5.9e-07	3.32e-06
ygjG	904.56	0.538462	0.107849	4.99273	5.95e-07	3.35e-06
adiY	591.42	0.580413	0.116483	4.9828	6.27e-07	3.52e-06
uhpA	3859.11	0.673705	0.135271	4.9804	6.35e-07	3.55e-06
dppC	1562.22	0.529161	0.106285	4.97871	6.4e-07	3.58e-06
kefB	2894.45	0.600319	0.120667	4.97501	6.52e-07	3.64e-06
nrfD	1954.85	0.541392	0.108963	4.96859	6.74e-07	3.75e-06
yidL	3975.99	0.681062	0.137067	4.96882	6.74e-07	3.75e-06
phnE	1799.18	0.534205	0.107686	4.96076	7.02e-07	3.9e-06
hinT	271.269	-0.761107	0.153558	-4.95649	7.18e-07	3.98e-06
setC	2134.57	0.547678	0.11073	4.94608	7.57e-07	4.19e-06
glpE	786.909	0.542909	0.109943	4.93812	7.89e-07	4.36e-06
yhjH	724.473	0.550372	0.111514	4.93545	8e-07	4.41e-06
frlD	1562.8	0.524158	0.106285	4.93165	8.15e-07	4.49e-06
agaV	1103.43	0.523265	0.106119	4.93091	8.18e-07	4.5e-06
pspF	402.456	-0.64725	0.13151	-4.92169	8.58e-07	4.71e-06
cadC	311.082	0.704883	0.143435	4.91432	8.91e-07	4.88e-06
minD	340.473	-0.686019	0.139791	-4.90747	9.23e-07	5.04e-06
yiaV	724.109	0.54732	0.111527	4.90751	9.22e-07	5.04e-06
nuoE	177.942	0.901879	0.184263	4.89453	9.85e-07	5.37e-06
yegI	264.143	-0.760209	0.155321	-4.89444	9.86e-07	5.37e-06
yaiI	398.517	-0.64574	0.131976	-4.89285	9.94e-07	5.4e-06
chbG	245.197	-0.784471	0.1605	-4.88766	1.02e-06	5.53e-06
malK	2547.19	0.565756	0.115772	4.8868	1.02e-06	5.55e-06
yigG	542.832	0.581395	0.119039	4.88408	1.04e-06	5.62e-06
ycjD	765.165	-0.5423	0.111054	-4.88321	1.04e-06	5.63e-06
ydgI	98.2642	-1.23569	0.253061	-4.88298	1.04e-06	5.63e-06
ulaG	1315.29	0.515673	0.105687	4.87924	1.06e-06	5.73e-06
ilvB	2844.65	0.584948	0.119943	4.87687	1.08e-06	5.79e-06
yhiK	539.046	0.581422	0.119256	4.87541	1.09e-06	5.82e-06
yfeO	444.865	0.613894	0.126089	4.86875	1.12e-06	6.01e-06
hycC	721.239	0.543214	0.11162	4.86664	1.14e-06	6.07e-06
asnA	1092.58	0.516321	0.106171	4.8631	1.16e-06	6.16e-06
bcsC	933.342	0.522609	0.10748	4.86238	1.16e-06	6.18e-06
dusB	1487.39	-0.51682	0.106314	-4.86125	1.17e-06	6.2e-06
dgoA	721.615	0.541846	0.111599	4.85528	1.2e-06	6.38e-06
hpt	1477.14	0.51411	0.105961	4.85189	1.22e-06	6.48e-06
upp	320.466	-0.694192	0.143164	-4.84893	1.24e-06	6.57e-06
znuB	98.8036	-1.2196	0.252055	-4.83865	1.31e-06	6.91e-06
bglF	1278.57	0.511314	0.105691	4.83782	1.31e-06	6.92e-06
pspE	192.143	-0.870749	0.180006	-4.83734	1.32e-06	6.93e-06
pspA	944.299	-0.520664	0.107833	-4.82842	1.38e-06	7.23e-06
frvA	1419.76	0.509941	0.105813	4.81928	1.44e-06	7.56e-06
yjbH	2018.19	0.527082	0.10955	4.81133	1.5e-06	7.86e-06
ybcF	170.094	-0.919311	0.191254	-4.80676	1.53e-06	8.01e-06
yzgL	231.243	0.782481	0.162786	4.80681	1.53e-06	8.01e-06
rffD	1624.26	0.512145	0.106581	4.80522	1.55e-06	8.06e-06
ymjB	99.3196	-1.20792	0.251543	-4.80203	1.57e-06	8.18e-06
nrfC	969.543	0.513537	0.107075	4.79603	1.62e-06	8.41e-06
yjcR	1450.96	0.507669	0.105887	4.79442	1.63e-06	8.47e-06
yhhN	543.877	0.570178	0.118969	4.79266	1.65e-06	8.53e-06
ygaZ	501.182	-0.586968	0.122569	-4.78887	1.68e-06	8.68e-06
kdsD	1646.85	0.510746	0.106701	4.78672	1.7e-06	8.75e-06
otsB	514.58	-0.581767	0.121654	-4.78215	1.73e-06	8.94e-06
umuC	417.046	-0.619682	0.129895	-4.77064	1.84e-06	9.45e-06
yiaW	1322.6	0.50413	0.105687	4.77002	1.84e-06	9.47e-06
ampG	1236.52	0.503976	0.105725	4.76687	1.87e-06	9.6e-06
aroA	27.2611	2.28474	0.479331	4.76652	1.87e-06	9.6e-06
barA	642.72	-0.547474	0.114965	-4.76208	1.92e-06	9.8e-06
yceI	519.848	-0.577339	0.121294	-4.75983	1.94e-06	9.9e-06
yhiL	178.212	0.87562	0.184048	4.75756	1.96e-06	9.99e-06
yhjD	1113.63	0.503272	0.106071	4.74468	2.09e-06	1.06e-05
aldB	3433.07	0.610758	0.128734	4.74434	2.09e-06	1.06e-05
ydjJ	193.779	-0.848593	0.179172	-4.73619	2.18e-06	1.11e-05
ydiH	391.951	-0.627994	0.132659	-4.73388	2.2e-06	1.11e-05
yicO	3106.57	0.586038	0.123797	4.73388	2.2e-06	1.11e-05
yidE	4732.94	0.702878	0.148579	4.73066	2.24e-06	1.13e-05
malQ	437.021	0.599539	0.126832	4.72702	2.28e-06	1.15e-05
yhhX	442.404	0.596838	0.126327	4.72455	2.31e-06	1.16e-05
yfcD	133.631	-1.01731	0.215773	-4.71474	2.42e-06	1.22e-05
ycjR	454.407	-0.595072	0.126255	-4.71325	2.44e-06	1.22e-05
nrdG	287.788	-0.70478	0.14959	-4.71143	2.46e-06	1.23e-05
lysC	888.822	0.509069	0.108065	4.71075	2.47e-06	1.24e-05
alr	862.448	0.510497	0.108479	4.70594	2.53e-06	1.26e-05
rffE	811.013	0.514421	0.109432	4.70084	2.59e-06	1.29e-05
yjcF	1935.89	0.509921	0.108791	4.68714	2.77e-06	1.38e-05
cysD	31.0961	-2.19316	0.467956	-4.68668	2.78e-06	1.38e-05
phnN	2294.02	0.526913	0.112528	4.68252	2.83e-06	1.41e-05
gspH	936.301	0.502997	0.107435	4.68186	2.84e-06	1.41e-05
proV	699.024	-0.527112	0.112917	-4.66813	3.04e-06	1.5e-05
arpA	1001.65	0.498346	0.106767	4.66762	3.05e-06	1.51e-05
dcuB	1336.31	0.492378	0.105695	4.65848	3.19e-06	1.57e-05
yhfA	1849.45	0.50287	0.108067	4.6533	3.27e-06	1.61e-05
citG	943.025	-0.501304	0.107834	-4.64886	3.34e-06	1.64e-05
cysI	16.7356	-3.308	0.7136	-4.63565	3.56e-06	1.75e-05
eptA	410.057	0.599863	0.129466	4.63334	3.6e-06	1.77e-05
yiaC	1314.22	0.489608	0.105687	4.63264	3.61e-06	1.77e-05
agaW	989.833	0.49482	0.106874	4.62996	3.66e-06	1.79e-05
trkG	306.438	-0.674368	0.145713	-4.62805	3.69e-06	1.8e-05
thiF	223.809	0.763902	0.165227	4.62335	3.78e-06	1.84e-05
yciS	242.479	-0.745237	0.161172	-4.62386	3.77e-06	1.84e-05
yecJ	419.932	-0.59881	0.129515	-4.62347	3.77e-06	1.84e-05
spy	333.278	-0.650731	0.140856	-4.61985	3.84e-06	1.86e-05
ydjQ	124.459	-1.03122	0.223668	-4.61051	4.02e-06	1.95e-05
dsdA	68.3566	-1.39667	0.30332	-4.6046	4.13e-06	2e-05
dgoT	4296.99	0.653103	0.14198	4.59997	4.23e-06	2.04e-05
yhcN	3686.31	0.610039	0.132612	4.60017	4.22e-06	2.04e-05
yhiD	465.128	0.571445	0.124358	4.59517	4.32e-06	2.08e-05
nrfB	1574.08	0.488117	0.106332	4.59052	4.42e-06	2.13e-05
yecM	248.708	-0.730095	0.159325	-4.58244	4.6e-06	2.21e-05
galF	252.138	-0.72524	0.158323	-4.58075	4.63e-06	2.22e-05
gspD	1413.66	0.484449	0.105799	4.57896	4.67e-06	2.24e-05
ycgL	308.601	-0.664425	0.145243	-4.57459	4.77e-06	2.28e-05
nuoH	274.279	0.688708	0.150944	4.56269	5.05e-06	2.41e-05
ulaC	980.908	0.488029	0.106959	4.56278	5.05e-06	2.41e-05
livM	457.928	0.56965	0.124971	4.55825	5.16e-06	2.46e-05
yceB	1878.84	-0.494637	0.10854	-4.5572	5.18e-06	2.46e-05
melA	1715.62	0.487867	0.107108	4.55491	5.24e-06	2.49e-05
cpdB	1276.11	0.479574	0.105688	4.53764	5.69e-06	2.7e-05
lysU	1352.21	0.479582	0.105704	4.53702	5.71e-06	2.7e-05
gatZ	312.485	-0.655078	0.144506	-4.53322	5.81e-06	2.75e-05
tgt	277.262	-0.688101	0.151951	-4.52846	5.94e-06	2.8e-05
baeS	227.451	-0.751006	0.165971	-4.52492	6.04e-06	2.85e-05
phnC	1388.6	0.478233	0.10575	4.52232	6.12e-06	2.88e-05
hyaF	224.899	-0.754129	0.16677	-4.52198	6.13e-06	2.88e-05
elbA	285.459	-0.677277	0.149998	-4.51525	6.32e-06	2.96e-05
gspE	118.445	1.01758	0.225355	4.51545	6.32e-06	2.96e-05
yjjI	1651.46	0.481846	0.106724	4.51489	6.33e-06	2.96e-05
rfaK	3585.13	0.591452	0.131059	4.51288	6.4e-06	2.99e-05
napB	523.907	-0.545523	0.120971	-4.50953	6.5e-06	3.02e-05
php	2277.49	0.506597	0.11233	4.50991	6.49e-06	3.02e-05
thiS	278.015	0.677277	0.150185	4.50963	6.49e-06	3.02e-05
zraR	2337.47	0.509885	0.113051	4.51022	6.48e-06	3.02e-05
epd	77.1266	-1.28361	0.285033	-4.50338	6.69e-06	3.1e-05
yjeI	1697.35	0.481078	0.106992	4.49639	6.91e-06	3.2e-05
yliJ	381.933	-0.601023	0.133818	-4.49135	7.08e-06	3.27e-05
nanT	1889	0.48664	0.108387	4.48982	7.13e-06	3.29e-05
dcuS	305.827	0.648089	0.144359	4.48941	7.14e-06	3.29e-05
acpT	427.87	0.573059	0.127677	4.48835	7.18e-06	3.31e-05
yhgA	284.496	0.667173	0.148699	4.48673	7.23e-06	3.32e-05
yojI	462.756	-0.562932	0.125466	-4.48674	7.23e-06	3.32e-05
ysdC	575.948	0.525957	0.11721	4.48731	7.21e-06	3.32e-05
rluB	62.1515	-1.42649	0.318087	-4.4846	7.31e-06	3.35e-05
fumB	1367.46	0.473247	0.105719	4.47644	7.59e-06	3.47e-05
yieK	753.255	0.495647	0.110727	4.47629	7.6e-06	3.47e-05
uvrB	189.281	-0.809947	0.181053	-4.47354	7.69e-06	3.51e-05
lepA	38.9659	1.76054	0.393573	4.47322	7.7e-06	3.51e-05
yjbR	1886.59	0.484575	0.108368	4.47155	7.77e-06	3.53e-05
yqiK	557.922	-0.53156	0.118932	-4.46945	7.84e-06	3.56e-05
fixC	1764.14	0.480112	0.10743	4.46907	7.86e-06	3.56e-05
cheW	310.98	-0.646618	0.14479	-4.4659	7.97e-06	3.61e-05
hyfB	736.626	-0.498853	0.11174	-4.46441	8.03e-06	3.63e-05
yjcP	2197.12	0.496785	0.111406	4.45922	8.23e-06	3.71e-05
yhjC	843.834	0.484509	0.108793	4.4535	8.45e-06	3.81e-05
frlB	1282.99	0.47022	0.105683	4.44935	8.61e-06	3.88e-05
yjcQ	2009.29	0.485713	0.109462	4.43728	9.11e-06	4.1e-05
feoA	370.684	0.595198	0.13416	4.43649	9.14e-06	4.1e-05
ynfH	320.842	-0.63402	0.142906	-4.43661	9.14e-06	4.1e-05
ychE	430.601	-0.569123	0.128387	-4.43288	9.3e-06	4.16e-05
yhjR	1883.14	0.480204	0.108339	4.43241	9.32e-06	4.17e-05
actP	1995.48	0.483115	0.10933	4.41886	9.92e-06	4.43e-05
tldD	2553.19	0.511573	0.115849	4.41585	1.01e-05	4.49e-05
rfaC	5.25398	6.18877	1.4024	4.41298	1.02e-05	4.53e-05
wcaC	358.902	-0.604066	0.13688	-4.41312	1.02e-05	4.53e-05
ppk	11.3821	3.61702	0.820421	4.40874	1.04e-05	4.62e-05
yhfS	946.726	0.472979	0.107314	4.40744	1.05e-05	4.64e-05
mntH	168.472	0.832733	0.189077	4.40419	1.06e-05	4.7e-05
yeaE	486.222	-0.543931	0.123569	-4.40185	1.07e-05	4.75e-05
yhfT	1451.2	0.465555	0.105886	4.39677	1.1e-05	4.85e-05
yecS	348.294	-0.608009	0.13842	-4.39249	1.12e-05	4.94e-05
yobA	238.732	0.704264	0.160382	4.39118	1.13e-05	4.97e-05
yjeP	975.549	0.469261	0.107007	4.38531	1.16e-05	5.1e-05
oppD	272.585	-0.670468	0.152912	-4.38467	1.16e-05	5.1e-05
yjeJ	3839.66	0.591524	0.134967	4.38272	1.17e-05	5.14e-05
yhhW	620.049	0.504481	0.115148	4.38114	1.18e-05	5.17e-05
dmsD	150.141	-0.888791	0.203023	-4.37778	1.2e-05	5.25e-05
alsA	1674.32	0.466356	0.106853	4.36446	1.27e-05	5.57e-05
rstB	71.0891	-1.2909	0.296204	-4.35815	1.31e-05	5.72e-05
yjbE	2632.46	0.507567	0.116934	4.34061	1.42e-05	6.19e-05
rnhB	1001.87	0.46306	0.106761	4.33736	1.44e-05	6.28e-05
relA	69.5393	-1.29961	0.299755	-4.33557	1.45e-05	6.32e-05
proP	842.094	0.471643	0.108823	4.33402	1.46e-05	6.35e-05
yeeI	420.606	-0.560428	0.129349	-4.33268	1.47e-05	6.39e-05
frlR	467.009	0.537937	0.124199	4.33126	1.48e-05	6.42e-05
iclR	1166.19	0.45757	0.10587	4.32201	1.55e-05	6.68e-05
ymfP	586.552	-0.50672	0.117382	-4.31686	1.58e-05	6.83e-05
ybiS	372.804	-0.582282	0.13494	-4.31513	1.6e-05	6.88e-05
cycA	554.719	0.51047	0.118335	4.31378	1.6e-05	6.91e-05
cobS	440.496	-0.549222	0.127411	-4.31062	1.63e-05	7e-05
yicS	2140.56	0.477228	0.110789	4.30755	1.65e-05	7.09e-05
yfaT	859.341	-0.469286	0.108996	-4.30556	1.67e-05	7.14e-05
puuP	380.172	-0.576343	0.133949	-4.30272	1.69e-05	7.22e-05
yhcG	1154.25	0.455735	0.105912	4.30295	1.69e-05	7.22e-05
amyA	327.57	-0.609343	0.141722	-4.29957	1.71e-05	7.31e-05
fliY	374.193	-0.579068	0.134723	-4.29821	1.72e-05	7.35e-05
gspC	735.045	0.47781	0.111201	4.2968	1.73e-05	7.38e-05
ycbJ	156.265	-0.853017	0.1989	-4.28868	1.8e-05	7.65e-05
yeaX	114.027	-0.998749	0.233172	-4.28332	1.84e-05	7.82e-05
phnL	2762.17	0.508058	0.118755	4.27819	1.88e-05	8e-05
yhfW	2594.35	0.497592	0.116409	4.27451	1.92e-05	8.12e-05
yhbU	1009.82	0.455796	0.106698	4.27184	1.94e-05	8.21e-05
ymgH	540.214	-0.512096	0.119899	-4.27105	1.95e-05	8.22e-05
rffM	384.535	0.565376	0.132383	4.27074	1.95e-05	8.22e-05
kbaZ	727.872	0.475419	0.111402	4.2676	1.98e-05	8.33e-05
bcsA	1275.06	0.450909	0.105687	4.26646	1.99e-05	8.36e-05
adiC	640.404	0.487324	0.114324	4.26267	2.02e-05	8.46e-05
kbl	929.193	-0.460268	0.107971	-4.26288	2.02e-05	8.46e-05
uspE	221.985	-0.71441	0.167572	-4.26331	2.01e-05	8.46e-05
ymjA	212.225	-0.729819	0.171195	-4.2631	2.02e-05	8.46e-05
rbsR	3037.71	0.523036	0.122768	4.26036	2.04e-05	8.54e-05
cysG	39.1167	-1.72673	0.405372	-4.25961	2.05e-05	8.56e-05
yceO	180.467	-0.788121	0.18508	-4.25827	2.06e-05	8.59e-05
yedQ	310.512	-0.616457	0.144758	-4.25855	2.06e-05	8.59e-05
yhaV	737.77	0.472857	0.111127	4.2551	2.09e-05	8.7e-05
gspA	1117.01	0.450706	0.106049	4.24999	2.14e-05	8.87e-05
paaA	576.627	-0.50084	0.117852	-4.24973	2.14e-05	8.87e-05
yehS	400.786	-0.558708	0.131464	-4.24989	2.14e-05	8.87e-05
lldP	686.911	0.478627	0.112653	4.24866	2.15e-05	8.9e-05
hisC	322.265	-0.605941	0.142639	-4.24808	2.16e-05	8.91e-05
nrfA	2494.16	0.488765	0.115057	4.24804	2.16e-05	8.91e-05
yiiQ	859.226	0.460851	0.10852	4.24668	2.17e-05	8.95e-05
cbpA	514.181	-0.515029	0.121537	-4.23765	2.26e-05	9.29e-05
yhiP	1263.2	0.447897	0.105694	4.23766	2.26e-05	9.29e-05
gnd	171.771	0.7929	0.187168	4.2363	2.27e-05	9.34e-05
dadA	344.729	-0.58798	0.138943	-4.23181	2.32e-05	9.51e-05
acrF	1898.74	0.458735	0.108468	4.22922	2.34e-05	9.6e-05
yfaA	805.831	-0.465288	0.110017	-4.22923	2.34e-05	9.6e-05
ybaJ	309.947	-0.612268	0.144839	-4.22724	2.37e-05	9.67e-05
gadE	1525.25	0.448112	0.106125	4.2225	2.42e-05	9.87e-05
yccC	509.773	-0.513824	0.121836	-4.21736	2.47e-05	0.000100802
yjbA	1775.67	0.45294	0.107511	4.21297	2.52e-05	0.000102651
ygfB	271.526	-0.645023	0.153121	-4.21251	2.53e-05	0.000102734
sgbH	2796.41	0.502111	0.119244	4.21077	2.54e-05	0.000103396
pspC	559.725	-0.49947	0.118759	-4.20575	2.6e-05	0.000105586
yjbD	1695.66	0.449887	0.106981	4.20532	2.61e-05	0.000105658
ydjK	543.684	-0.503143	0.119689	-4.20376	2.63e-05	0.000106252
trg	162.984	-0.817484	0.194596	-4.20093	2.66e-05	0.000107456
exo	1319.05	0.443529	0.105681	4.19687	2.71e-05	0.000109266
mdtI	123.098	-0.940902	0.224275	-4.19531	2.72e-05	0.000109881
yidR	5227.49	0.653996	0.155898	4.19502	2.73e-05	0.000109887
fixB	1659.23	0.447847	0.106765	4.19469	2.73e-05	0.000109907
ynbD	87.6274	-1.11644	0.266191	-4.19412	2.74e-05	0.000110047
rob	784.898	-0.462967	0.110478	-4.19059	2.78e-05	0.000111636
melB	853.797	0.454904	0.108612	4.18835	2.81e-05	0.000112607
hdhA	285.607	-0.626322	0.149818	-4.18056	2.91e-05	0.000116202
yhaC	695.376	0.469719	0.112363	4.18036	2.91e-05	0.000116202
yjfL	678.992	0.472087	0.112916	4.18087	2.9e-05	0.000116202
ycfN	274.06	-0.636805	0.152431	-4.17765	2.95e-05	0.000117306
yedJ	323.912	-0.594459	0.142289	-4.17782	2.94e-05	0.000117306
yjbB	2855.95	0.501588	0.120102	4.17636	2.96e-05	0.000117827
glnG	20.1072	2.32768	0.558268	4.16946	3.05e-05	0.000121306
ybjT	707.172	-0.468545	0.112568	-4.16234	3.15e-05	0.000124999
hemX	243.281	0.661841	0.159026	4.16185	3.16e-05	0.000125111
yebK	90.5547	-1.08735	0.261614	-4.15633	3.23e-05	0.000128019
elaC	584.901	-0.487299	0.117423	-4.14994	3.33e-05	0.00013148
yjdL	1152.58	0.439429	0.105918	4.14878	3.34e-05	0.000131825
yniD	168.74	-0.793583	0.19127	-4.14903	3.34e-05	0.000131825
yibQ	1369.5	0.437712	0.105721	4.14027	3.47e-05	0.00013665
gadX	1734.24	0.443837	0.107227	4.13924	3.48e-05	0.000137094
ygjM	584.722	0.483022	0.116757	4.13697	3.52e-05	0.000138294
yjhQ	1052.03	0.440088	0.106387	4.13667	3.52e-05	0.000138304
mdtH	363.832	-0.562547	0.136067	-4.13434	3.56e-05	0.000139484
yniB	175.91	-0.774424	0.187323	-4.13416	3.56e-05	0.000139484
ppiB	458.852	0.516038	0.124848	4.13333	3.58e-05	0.000139825
pepT	543.823	-0.494384	0.119661	-4.13153	3.6e-05	0.00014075
hdeB	812.029	0.451471	0.109395	4.127	3.68e-05	0.000143383
yjfM	738.127	0.458135	0.111119	4.12294	3.74e-05	0.000145753
ilvN	8090.47	0.797701	0.193537	4.12169	3.76e-05	0.000146197
yejO	1057.17	0.438369	0.106355	4.12177	3.76e-05	0.000146197
ycdL	596.334	-0.481464	0.116857	-4.12011	3.79e-05	0.000147025
nrfF	1156.48	0.435959	0.105905	4.11653	3.85e-05	0.000149151
flgK	363.586	-0.558828	0.136119	-4.10543	4.04e-05	0.000156311
fdnI	282.662	-0.617153	0.150438	-4.10237	4.09e-05	0.000158204
mdtE	458.241	0.511917	0.124892	4.09887	4.15e-05	0.00016042
fxsA	357.17	0.556939	0.13594	4.09693	4.19e-05	0.000161576
yihR	394.203	0.537442	0.13121	4.09605	4.2e-05	0.000161998
yhcD	1098.39	0.434675	0.106135	4.0955	4.21e-05	0.000162189
rihB	276.375	-0.621669	0.151854	-4.09386	4.24e-05	0.000163151
ynfD	338.961	-0.572043	0.139776	-4.09257	4.27e-05	0.000163864
nfsA	1197.39	-0.434197	0.106115	-4.09175	4.28e-05	0.00016425
yigA	1045.56	0.43516	0.106434	4.08856	4.34e-05	0.000166326
yjhT	637.089	0.467888	0.114461	4.08775	4.36e-05	0.000166712
lysS	164.787	0.780092	0.190924	4.08587	4.39e-05	0.000167868
cheB	230.545	-0.67231	0.16456	-4.08551	4.4e-05	0.000167935
rimJ	542.573	-0.488418	0.119726	-4.07947	4.51e-05	0.000172154
ydiN	351.047	-0.562145	0.13787	-4.07734	4.56e-05	0.00017353
cheA	382.108	-0.544267	0.133654	-4.07222	4.66e-05	0.000177188
ycfJ	607.88	-0.473027	0.116313	-4.06684	4.77e-05	0.000181112
flxA	641.536	-0.467003	0.114869	-4.06552	4.79e-05	0.000181925
yegZ	610.498	-0.472353	0.116194	-4.0652	4.8e-05	0.000181963
rof	272.382	0.614847	0.151359	4.06217	4.86e-05	0.000184125
manX	62.7542	-1.27234	0.314431	-4.0465	5.2e-05	0.000196663
yodD	151.646	-0.815359	0.201622	-4.04401	5.25e-05	0.000198533
yjiM	940.666	0.434135	0.10738	4.04297	5.28e-05	0.000199182
yehZ	309.294	-0.585644	0.144912	-4.04139	5.31e-05	0.000200296
pntB	151.526	-0.81368	0.201591	-4.0363	5.43e-05	0.000204449
sspB	6883.1	0.720624	0.178725	4.03203	5.53e-05	0.00020774
ytfT	664.425	0.457324	0.113424	4.032	5.53e-05	0.00020774
sufE	296.62	0.58791	0.146084	4.02445	5.71e-05	0.000214211
yibK	2065.42	0.442703	0.110009	4.02425	5.72e-05	0.000214211
fcl	1000.99	-0.431129	0.107148	-4.02367	5.73e-05	0.000214485
yjeH	803.176	0.440724	0.109578	4.02201	5.77e-05	0.000215752
selB	364.373	0.542188	0.134914	4.01877	5.85e-05	0.000218492
tdcA	112.887	-0.93958	0.234213	-4.01165	6.03e-05	0.000224672
yheO	999.409	0.42838	0.106784	4.01166	6.03e-05	0.000224672
yeaG	439.913	-0.50998	0.127368	-4.00399	6.23e-05	0.000231807
ivbL	5694.74	0.650157	0.162619	3.99803	6.39e-05	0.000237449
yeiG	559.726	-0.474103	0.118723	-3.99335	6.51e-05	0.000241909
puuE	189.888	-0.718834	0.180337	-3.98605	6.72e-05	0.000249178
glnB	290.907	-0.59072	0.148557	-3.97638	7e-05	0.000259238
yhhJ	646.701	0.453498	0.114077	3.97538	7.03e-05	0.000260026
ycdO	590.252	-0.465388	0.11711	-3.97396	7.07e-05	0.00026129
yhgG	173.07	0.738345	0.186491	3.95914	7.52e-05	0.000277723
flgE	675.367	-0.449196	0.113582	-3.95482	7.66e-05	0.000282465
htrC	695.921	0.44377	0.112353	3.9498	7.82e-05	0.000288134
idnT	699.976	0.442791	0.112212	3.94602	7.95e-05	0.000292381
iscR	377.949	0.525312	0.133156	3.94508	7.98e-05	0.000293201
yhaL	3287.89	0.49873	0.126521	3.94189	8.08e-05	0.000296791
dtd	1194.43	0.416915	0.105802	3.94051	8.13e-05	0.000298162
ybjD	866.869	-0.428772	0.108821	-3.94016	8.14e-05	0.000298265
rpiB	1677.52	0.421016	0.10687	3.93953	8.16e-05	0.000298704
tdcR	851.073	0.427789	0.10865	3.9373	8.24e-05	0.000301149
ykgH	398.218	-0.517761	0.131674	-3.93213	8.42e-05	0.000307358
yneI	89.8645	-1.03029	0.262116	-3.93068	8.47e-05	0.000308869
ygeW	1472.16	0.41625	0.105941	3.92909	8.53e-05	0.000310576
rfaS	1149.31	0.415533	0.105923	3.92297	8.75e-05	0.000318206
yjfY	1353.18	0.414332	0.105703	3.91977	8.86e-05	0.0003221
ymfN	601.032	-0.4558	0.116591	-3.90938	9.25e-05	0.000335906
nrdD	453.416	-0.49302	0.126122	-3.90907	9.27e-05	0.000335952
glcF	995.963	0.417343	0.106811	3.9073	9.33e-05	0.000337663
yjbJ	824.978	0.426433	0.109134	3.90744	9.33e-05	0.000337663
yfbV	670.816	-0.444229	0.113733	-3.90589	9.39e-05	0.000339259
cld	877.434	-0.424015	0.108645	-3.90276	9.51e-05	0.000343065
sufB	558.423	0.460961	0.118115	3.90266	9.51e-05	0.000343065
ydaY	173.93	-0.733688	0.188169	-3.8991	9.66e-05	0.000347759
yafX	309.159	0.559654	0.14365	3.89596	9.78e-05	0.000351905
astC	371.808	-0.525123	0.134917	-3.89219	9.93e-05	0.000357021
galS	149.781	-0.788651	0.202698	-3.89077	9.99e-05	0.000358709
ybcJ	310.417	-0.562799	0.14466	-3.8905	0.00010004	0.000358725
garK	716.222	0.43458	0.111731	3.8895	0.00010045	0.000359798
frdA	375.235	0.51902	0.133494	3.88798	0.000101082	0.000361661
nikR	516.561	0.468351	0.120602	3.88343	0.000102994	0.000368094
ddpA	127.201	-0.854649	0.220174	-3.88169	0.000103731	0.000369914
flgN	818.156	-0.425883	0.109712	-3.88183	0.000103672	0.000369914
narX	210.913	-0.664654	0.171367	-3.87854	0.000105087	0.000374335
malT	655.097	0.440641	0.113758	3.8735	0.000107284	0.000381742
ycgK	631.318	-0.446243	0.115252	-3.87189	0.000107993	0.000383842
yhiF	906.991	0.415694	0.107798	3.85621	0.000115157	0.00040886
yhiJ	434.82	0.48942	0.126984	3.85419	0.000116115	0.000411807
yhhH	195.255	0.677138	0.175915	3.84923	0.000118489	0.000419606
ytfE	845.243	0.418626	0.108761	3.84906	0.000118573	0.000419606
mscL	1779.64	0.412917	0.107537	3.83976	0.000123156	0.00043535
fimH	741.221	0.426006	0.111038	3.83657	0.000124767	0.000440561
yggJ	971.916	-0.411612	0.107418	-3.83187	0.000127173	0.000448569
apaG	378.402	0.509589	0.133103	3.82852	0.000128916	0.000454221
phnO	2211.16	0.426771	0.111561	3.82543	0.000130543	0.000459454
ppiA	3573.38	0.500617	0.130875	3.82516	0.000130687	0.000459461
yhiN	370.157	0.512844	0.134146	3.82304	0.000131815	0.000462926
flgI	387.598	-0.508013	0.132904	-3.82241	0.000132151	0.000463603
yjeO	1201.85	0.403929	0.105782	3.81852	0.000134257	0.000470482
yfbM	344.373	-0.529971	0.138812	-3.8179	0.000134591	0.00047114
yghZ	839.752	0.415428	0.108854	3.81638	0.000135426	0.000473554
yfeK	336.524	-0.534335	0.140043	-3.8155	0.000135909	0.000474729
ynhG	192.52	-0.682492	0.178912	-3.81469	0.000136356	0.000475776
grxA	839.026	-0.416432	0.109299	-3.81004	0.000138943	0.000484282
ldcA	48.5911	-1.36255	0.357748	-3.80869	0.000139704	0.000486411
dcuD	1864.47	0.411455	0.108183	3.80333	0.000142764	0.000496532
rumB	1069.31	-0.405446	0.106618	-3.80279	0.000143078	0.000497088
deoB	1528.22	0.403422	0.106133	3.8011	0.000144056	0.000499948
yjbL	1216.59	0.401796	0.105747	3.79958	0.00014494	0.000502479
flgF	836.412	-0.414837	0.109347	-3.79376	0.000148381	0.000513842
yjdJ	1063.44	0.403312	0.106316	3.79351	0.000148535	0.000513842
yrbC	586.409	0.442291	0.116672	3.79088	0.000150116	0.000518757
dam	71.6469	-1.11176	0.293364	-3.78968	0.000150842	0.000520709
aaeB	2121.82	0.418568	0.110587	3.78496	0.000153733	0.000530126
topB	151.385	-0.762463	0.201468	-3.78454	0.000153993	0.000530457
ompF	443.895	0.477022	0.126129	3.782	0.000155571	0.000535322
entC	456.16	0.472802	0.125064	3.78047	0.000156533	0.00053788
garL	1129.35	0.400706	0.105999	3.78029	0.000156646	0.00053788
ugpA	477.784	0.465869	0.123329	3.77744	0.000158451	0.000543499
ycaR	56.1995	1.22449	0.324336	3.77538	0.000159762	0.000547417
rtcB	549.975	0.446458	0.118577	3.76513	0.000166461	0.000569767
yhhM	311.868	0.539149	0.143207	3.76483	0.000166662	0.000569854
ybjJ	679.842	-0.426567	0.113399	-3.76163	0.000168811	0.000576593
caiB	3001.16	0.459462	0.122224	3.75917	0.000170481	0.000581682
yheT	3204.38	0.470575	0.125258	3.75685	0.000172069	0.000586483
relE	161.813	-0.732139	0.194978	-3.75498	0.000173357	0.000590252
nrdE	229.604	-0.617058	0.164672	-3.74719	0.000178829	0.000608245
uxuR	656.964	0.425769	0.113675	3.7455	0.000180032	0.000611695
ybjE	534.13	-0.449729	0.120159	-3.74277	0.000181999	0.00061773
garP	1144.3	0.396375	0.105941	3.74147	0.000182944	0.000620286
brnQ	790.635	0.410864	0.109829	3.74095	0.000183328	0.000620939
ydhR	232.684	-0.611879	0.163736	-3.73698	0.000186241	0.000629488
yrbB	1481.35	0.396029	0.10597	3.73717	0.000186102	0.000629488
gntT	859.8	0.405225	0.108512	3.7344	0.000188165	0.000635325
iadA	615.616	0.430637	0.115334	3.73382	0.000188596	0.00063612
fkpB	2098.52	0.411911	0.110345	3.73294	0.000189259	0.000637691
yedA	306.148	-0.542556	0.145357	-3.73257	0.000189534	0.000637952
yfdF	95.5469	-0.946269	0.253703	-3.72983	0.000191609	0.000644269
yihO	1066.34	0.396318	0.106304	3.72817	0.000192879	0.000647864
yjhH	765.607	0.411226	0.110408	3.7246	0.000195629	0.000656421
yjbM	994.578	0.397787	0.106825	3.7237	0.000196321	0.000658061
ybjI	256.054	-0.583635	0.156805	-3.72205	0.000197613	0.000661708
tsgA	1314.83	0.393226	0.105678	3.72097	0.000198459	0.000663854
yeaH	213.021	-0.633886	0.170441	-3.7191	0.000199931	0.000668088
yrhA	192.659	0.654274	0.177018	3.69609	0.000218944	0.000730867
yihQ	917.121	0.397505	0.107665	3.69204	0.000222464	0.000741853
yrdA	568.925	0.43373	0.117565	3.68926	0.000224904	0.000749216
rbbA	888.975	0.398242	0.108055	3.68555	0.000228213	0.000758678
sodC	131.596	-0.796641	0.216146	-3.68566	0.000228108	0.000758678
livJ	402.228	0.479714	0.130286	3.682	0.000231415	0.000768534
gltD	1793.01	0.395481	0.107635	3.67428	0.000238517	0.000791309
paaG	205.247	-0.637344	0.173474	-3.674	0.000238781	0.000791373
elaB	446.019	-0.465463	0.126737	-3.67268	0.000240023	0.000793907
flgB	416.681	-0.475838	0.129571	-3.67242	0.000240267	0.000793907
maoC	287.91	-0.547376	0.149051	-3.6724	0.000240281	0.000793907
ogrK	897.864	-0.397488	0.10831	-3.66992	0.000242623	0.00080083
flgL	173.348	-0.690059	0.188243	-3.66579	0.000246573	0.000812212
ydaL	52.6754	-1.25513	0.342388	-3.6658	0.000246564	0.000812212
potG	455.196	-0.461312	0.12592	-3.66354	0.00024875	0.00081855
flgG	161.05	-0.714827	0.195246	-3.66116	0.00025108	0.000824648
malM	1176.43	0.387504	0.105843	3.66112	0.000251113	0.000824648
feaB	419.542	-0.473121	0.12928	-3.65967	0.00025254	0.000828495
chiA	796.507	0.401399	0.109705	3.65888	0.000253315	0.000830198
csgE	377.344	-0.49061	0.134131	-3.6577	0.000254489	0.000833202
nirC	3426.22	0.470348	0.128623	3.65679	0.000255389	0.000835302
ansP	235.527	-0.594633	0.162669	-3.65547	0.000256711	0.000838778
ypdH	362.943	-0.497023	0.136052	-3.65319	0.000259006	0.000845423
ynfG	96.2504	-0.923774	0.252886	-3.65292	0.000259271	0.000845437
alsE	1202.86	0.385954	0.105781	3.64863	0.000263648	0.000858844
ygjJ	759.558	0.403346	0.110568	3.64795	0.000264344	0.000860248
yqiG	431.184	0.464328	0.127308	3.64729	0.000265026	0.000861599
ychF	15.4373	-2.46011	0.674927	-3.645	0.000267387	0.000868406
ychH	684.955	-0.411871	0.113196	-3.63855	0.000274176	0.000888671
yhcH	1037.25	0.387476	0.106485	3.63877	0.000273946	0.000888671
yejH	824.954	-0.397769	0.109539	-3.63129	0.000282008	0.000912881
yjgX	692.093	0.40834	0.112456	3.63111	0.000282209	0.000912881
yjhD	565.184	0.42719	0.117746	3.62807	0.000285545	0.000922749
stfR	252.064	-0.572139	0.157831	-3.62502	0.000288944	0.000932502
ydjE	208.346	-0.624221	0.172206	-3.62484	0.000289139	0.000932502
yciW	287.733	-0.539556	0.14907	-3.61948	0.000295196	0.000951089
yjdF	1167.09	0.38315	0.105868	3.61915	0.000295574	0.000951361
ycgF	102.732	-0.88491	0.244598	-3.61782	0.000297094	0.000955304
ptr	830.06	-0.395879	0.109446	-3.61712	0.000297895	0.000956927
agp	789.898	-0.398777	0.110277	-3.61614	0.00029903	0.000959621
tonB	92.7263	0.914671	0.25356	3.60731	0.000309385	0.000991871
wcaB	467.35	-0.449908	0.124867	-3.60309	0.00031446	0.00100714
acnA	266.368	-0.554489	0.154078	-3.59877	0.00031973	0.00102301
ynfL	77.0792	-1.01369	0.281919	-3.59569	0.000323533	0.00103416
ymfQ	274.138	-0.546539	0.152162	-3.59182	0.000328383	0.00104862
fecB	842.207	0.390683	0.108806	3.59062	0.000329887	0.00105239
pioO	1710.57	0.384398	0.10707	3.59014	0.000330502	0.00105331
hchA	220.679	-0.601449	0.167577	-3.5891	0.000331827	0.00105649
emtA	412.172	-0.466394	0.130029	-3.58686	0.000334688	0.00106456
mtgA	1650.76	0.382186	0.106715	3.58136	0.000341811	0.00108615
yaaJ	1940.31	0.389466	0.108825	3.57883	0.000345133	0.00109563
ycjP	480.113	-0.443079	0.123844	-3.57771	0.000346611	0.00109924
malS	2664.1	0.419845	0.117371	3.57708	0.000347454	0.00110084
ynjB	263.015	-0.554092	0.15492	-3.57663	0.000348051	0.00110165
ydiY	215.672	-0.605353	0.169435	-3.57278	0.000353216	0.00111691
prc	8.19575	-4.08866	1.14452	-3.57239	0.00035374	0.00111747
wcaI	324.783	-0.506629	0.141917	-3.56989	0.000357131	0.00112709
yahF	278.184	0.535118	0.15001	3.56722	0.000360783	0.0011375
torA	1265.82	-0.377795	0.105959	-3.56548	0.000363188	0.00114397
puuB	360.5	-0.48562	0.136355	-3.56143	0.00036884	0.00116065
ycjF	190.346	-0.639709	0.179797	-3.55794	0.000373773	0.00117503
recN	499.573	-0.43552	0.122422	-3.55753	0.000374353	0.00117571
cybC	714.217	0.397495	0.11179	3.55572	0.000376941	0.00118269
ycfR	354.538	-0.487588	0.13721	-3.55359	0.00038001	0.00119117
ydiO	101.975	-0.871215	0.245432	-3.54972	0.000385648	0.00120767
puuC	67.3354	-1.07059	0.30168	-3.54875	0.000387066	0.00121094
ycgH	254.142	-0.557535	0.157258	-3.54536	0.000392081	0.00122544
hisL	536.934	-0.424908	0.119954	-3.54226	0.000396709	0.00123871
arsR	427.554	0.452008	0.12765	3.54099	0.000398632	0.00124352
ymgD	287.319	-0.527553	0.149131	-3.53751	0.000403912	0.00125878
hisB	312.84	-0.509381	0.144061	-3.53588	0.000406419	0.00126537
ytfG	815.648	0.384725	0.109317	3.51935	0.000432613	0.00134563
nlpC	31.9648	-1.55708	0.4427	-3.51723	0.000436081	0.00135512
narY	54.1712	-1.18358	0.336782	-3.51439	0.000440768	0.00136837
pncB	285.906	-0.524679	0.149462	-3.51046	0.00044733	0.00138741
basS	527.179	0.420928	0.119923	3.50998	0.000448137	0.00138858
yebG	113.739	-0.815321	0.232319	-3.50949	0.00044897	0.00138983
ycgZ	70.797	-1.03188	0.294058	-3.5091	0.000449618	0.00139051
yijD	2589.69	0.407506	0.116343	3.50263	0.000460693	0.0014234
tynA	230.075	-0.574723	0.164359	-3.49676	0.000470953	0.00145371
ymcB	652.761	-0.399795	0.114349	-3.49627	0.000471803	0.00145495
yccU	143.336	-0.721695	0.206763	-3.49044	0.000482226	0.00148568
yjgM	512.96	0.42132	0.120819	3.4872	0.000488109	0.00150237
argG	1509.26	0.369828	0.106064	3.48682	0.000488792	0.00150305
fliQ	226.213	-0.577197	0.165705	-3.48329	0.000495294	0.0015216
glvG	5119.35	0.533923	0.15431	3.46006	0.000540058	0.00165754
sthA	5824.05	0.568607	0.16444	3.45784	0.000544516	0.00166964
yhdV	1167.71	0.365802	0.105866	3.45531	0.000549659	0.00168382
trmU	4.05285	-5.10584	1.47779	-3.45505	0.000550192	0.00168386
pgm	5.747	4.29936	1.24692	3.44798	0.00056479	0.0017269
ymcA	313.558	-0.495759	0.143837	-3.44667	0.000567535	0.00173366
paaH	297.23	-0.506389	0.147022	-3.4443	0.00057253	0.00174727
gatC	1165.03	-0.365511	0.106155	-3.44319	0.00057489	0.00175282
hyaB	217.601	-0.580115	0.168623	-3.4403	0.000581062	0.00176997
yeaS	73.991	-0.988944	0.287498	-3.43983	0.000582088	0.00177143
yidI	3603.75	0.451674	0.131339	3.43899	0.000583887	0.00177524
oppC	180.014	-0.634454	0.184549	-3.43785	0.000586343	0.00178103
ibpA	2858.63	0.412691	0.120138	3.43514	0.000592258	0.00179731
ydiV	153.112	-0.687046	0.200071	-3.43401	0.000594726	0.00180311
mazG	782.801	-0.379061	0.110427	-3.4327	0.00059761	0.00181016
mipA	295.966	-0.505472	0.147288	-3.43186	0.000599464	0.00181408
pspB	272.614	-0.522755	0.152478	-3.4284	0.000607143	0.0018356
mrcA	819.118	0.374153	0.109238	3.42513	0.000614504	0.00185439
ycgR	341.052	-0.476748	0.139182	-3.42537	0.000613964	0.00185439
yhdY	1310.76	0.361906	0.105678	3.4246	0.00061571	0.0018563
fnr	42.9395	-1.29654	0.378679	-3.42383	0.000617444	0.00185827
yedZ	225.244	-0.568261	0.165974	-3.4238	0.000617512	0.00185827
nudD	625.028	-0.394397	0.115442	-3.41641	0.000634521	0.00190769
adhP	167.342	-0.653575	0.191323	-3.41608	0.000635298	0.00190825
yedR	299.918	-0.500356	0.146506	-3.41526	0.000637214	0.00191223
sucC	748.127	0.378501	0.11084	3.41485	0.000638182	0.00191336
tap	461.316	-0.427214	0.12531	-3.40926	0.000651398	0.00195118
paaD	374.993	-0.457862	0.134361	-3.4077	0.000655137	0.00196057
yedF	301.745	-0.497299	0.146093	-3.40399	0.000664091	0.00198553
abgR	206.438	-0.588013	0.172784	-3.40318	0.000666066	0.0019896
mdtA	852.939	-0.370719	0.109001	-3.40105	0.000671284	0.00200334
mdoC	362.852	-0.46195	0.135938	-3.39823	0.000678229	0.0020222
ulaF	1392.69	0.359339	0.105754	3.39789	0.000679088	0.00202289
rtcA	338.12	0.470506	0.138702	3.3922	0.00069335	0.00206348
ulaB	1441.58	0.35896	0.105857	3.39099	0.000696414	0.0020707
yedI	342.112	-0.471345	0.139041	-3.38997	0.000699009	0.00207651
ybjM	1093.35	-0.360646	0.10645	-3.38795	0.000704174	0.00208993
yfcY	229.427	-0.555853	0.164525	-3.37854	0.000728718	0.0021608
yjjA	914.959	0.363498	0.107687	3.37552	0.000736763	0.00218265
yehU	302.104	-0.492423	0.146002	-3.37271	0.000744333	0.00220306
nhoA	105.052	-0.811632	0.241519	-3.36053	0.000777932	0.00230041
yicG	3822.7	0.452608	0.134702	3.36007	0.000779233	0.00230215
tam	33.0995	-1.45725	0.43381	-3.3592	0.000781697	0.00230732
marA	42.4123	-1.27957	0.381075	-3.3578	0.000785648	0.00231687
yhgN	374.36	0.447742	0.133592	3.35157	0.000803542	0.00236749
yncJ	81.7427	-0.915695	0.273452	-3.34865	0.000812072	0.00239044
kefG	995.998	0.357617	0.106811	3.34814	0.000813563	0.00239266
nrfE	1067.76	0.355756	0.106289	3.34708	0.000816678	0.00239747
yecI	289.342	-0.497461	0.148616	-3.3473	0.000816027	0.00239747
appC	443.768	-0.424505	0.126845	-3.34663	0.000818008	0.00239919
ydiB	225.61	-0.553926	0.16583	-3.34032	0.000836809	0.00245212
paaX	127.263	-0.731888	0.219354	-3.33656	0.000848229	0.00248333
yjcZ	156.307	0.653087	0.195791	3.33563	0.000851054	0.00248935
phoH	698.199	-0.375511	0.11271	-3.33166	0.000863298	0.00252289
yjeN	503.884	0.404246	0.121426	3.32917	0.00087106	0.00254328
dmsC	344.515	-0.461578	0.138674	-3.32851	0.000873106	0.00254695
exuT	1643.67	0.35485	0.106676	3.32643	0.000879663	0.00256364
yjdI	870.508	0.36033	0.108331	3.32619	0.000880411	0.00256364
paaF	1238.41	-0.352431	0.105976	-3.32559	0.00088232	0.00256689
lsrF	69.6614	-0.983571	0.295836	-3.32472	0.000885079	0.00257261
cadA	1726.74	0.355161	0.107175	3.31384	0.000920244	0.00267013
ynjH	77.1705	-0.93163	0.281134	-3.31383	0.000920279	0.00267013
yeiE	175	-0.620013	0.187139	-3.31311	0.000922656	0.00267463
acrE	661.65	0.375883	0.113503	3.31166	0.00092743	0.00268606
phnP	1795.83	0.356259	0.107654	3.30931	0.000935276	0.00270637
blr	50.4057	-1.15267	0.348556	-3.30697	0.000943107	0.00272659
ydhP	223.099	-0.549713	0.166602	-3.29955	0.000968396	0.0027972
ulaD	2097.88	0.363639	0.110338	3.29568	0.00098185	0.00283354
yeaY	205.862	0.564733	0.171466	3.29355	0.000989305	0.00285251
ydgJ	105.439	-0.793528	0.240962	-3.29317	0.000990657	0.00285387
fecI	537.403	0.392806	0.119309	3.29235	0.000993551	0.00285966
tbpA	1455.56	0.348514	0.105894	3.29117	0.000997716	0.0028691
yjfC	723.817	0.36691	0.111506	3.29051	0.00100007	0.00287331
rpoZ	3140.76	0.408929	0.124302	3.28981	0.00100254	0.00287786
iscA	43.8536	1.20286	0.365876	3.2876	0.00101044	0.00289797
fecA	852.346	0.357029	0.108633	3.28657	0.00101415	0.00290604
artJ	501.289	-0.40055	0.122204	-3.2777	0.00104656	0.00299626
yhfX	4642.65	0.482269	0.147214	3.27597	0.001053	0.00301204
gatD	324.65	-0.464012	0.141839	-3.2714	0.00107015	0.00305568
yajI	430.009	-0.419204	0.128137	-3.27154	0.00106963	0.00305568
ydcW	140.704	-0.682205	0.208556	-3.27109	0.00107132	0.00305634
slt	1911.5	0.354996	0.108574	3.26963	0.00107689	0.00306952
ltaE	526.192	-0.394043	0.120554	-3.26861	0.00108076	0.00307785
cspE	681.271	-0.37009	0.113277	-3.26714	0.0010864	0.00309117
pabB	7.04104	-3.88607	1.18959	-3.26673	0.00108796	0.0030929
chbF	141.965	-0.677851	0.207561	-3.2658	0.00109157	0.00310044
ydfP	13.6388	-2.31054	0.70818	-3.26264	0.00110379	0.0031324
hisA	377.085	-0.436753	0.134036	-3.25847	0.00112016	0.00317606
proA	426.065	0.416302	0.127788	3.25776	0.00112295	0.00318119
yhcM	2375.79	0.36968	0.113521	3.25648	0.00112803	0.0031928
asnB	778.866	-0.359731	0.110495	-3.25562	0.00113143	0.00319696
yghY	530.038	0.389871	0.119753	3.25561	0.00113148	0.00319696
dhaL	345.905	-0.450212	0.138388	-3.25326	0.0011409	0.00322078
alkA	256.799	-0.508537	0.156353	-3.2525	0.00114394	0.00322655
hmp	582.303	-0.381445	0.117408	-3.24887	0.00115863	0.00326515
fdnH	145.651	-0.664674	0.204954	-3.24304	0.00118262	0.00332817
ybiN	235.335	-0.52728	0.162594	-3.24293	0.00118305	0.00332817
yjfZ	1320.09	0.342654	0.105682	3.24232	0.00118559	0.00333242
ytfA	262.087	0.498455	0.1538	3.24093	0.00119142	0.00334589
yodC	403.003	-0.424225	0.130946	-3.2397	0.00119654	0.00335735
yceA	573.911	-0.381571	0.117817	-3.23866	0.00120091	0.00336411
ycgY	105.461	-0.780049	0.240857	-3.23864	0.00120102	0.00336411
fis	48.6751	-1.14767	0.35471	-3.23552	0.00121422	0.00339813
grxB	626.269	-0.372964	0.115356	-3.23315	0.00122432	0.00342275
hdeD	520.407	0.38905	0.120339	3.23296	0.00122513	0.00342275
yciU	53.1357	-1.09498	0.338862	-3.23135	0.00123207	0.00343919
ydiF	46.9627	-1.1649	0.360788	-3.22877	0.00124325	0.0034674
yhcC	1687.54	0.345194	0.10693	3.22823	0.00124558	0.00347089
uvrC	295.222	-0.475323	0.147384	-3.22506	0.00125945	0.00350652
glcC	531.09	0.38576	0.119676	3.22335	0.00126699	0.00352448
cheR	220.163	-0.539553	0.167551	-3.22022	0.00128092	0.00356018
yliG	412.179	-0.417745	0.129953	-3.21457	0.00130638	0.00362784
yjiR	477.078	0.396462	0.123363	3.21379	0.00130998	0.00363471
npr	640.354	-0.368584	0.114786	-3.21106	0.00132247	0.00366622
msrA	861.059	0.347565	0.108487	3.20374	0.00135656	0.00375752
fliG	268.35	-0.490932	0.153395	-3.20044	0.00137216	0.00379748
yrfC	1854.86	0.345758	0.108106	3.19831	0.00138237	0.00382246
yihI	926.223	0.343637	0.107548	3.19521	0.0013973	0.00385718
ypjD	385.02	-0.42517	0.133065	-3.19521	0.00139728	0.00385718
yoaH	3.48969	-4.89296	1.53257	-3.19266	0.00140971	0.00388811
flgJ	244.193	-0.509174	0.159814	-3.18604	0.00144235	0.00397475
nrdF	407.486	-0.414831	0.130443	-3.18018	0.00147186	0.00405262
narV	81.9789	-0.866461	0.272491	-3.17977	0.0014739	0.0040548
etp	286.716	-0.47413	0.149164	-3.17859	0.00147993	0.00406793
mbhA	310.894	0.455365	0.143338	3.17686	0.00148876	0.00408873
ydfX	46.7112	-1.14562	0.361438	-3.16963	0.00152631	0.00418829
sgcQ	547.321	0.375657	0.118728	3.164	0.00155615	0.00426655
fliO	99.6013	-0.783749	0.247773	-3.16317	0.00156059	0.00427512
elaA	540.298	-0.378045	0.11967	-3.15907	0.00158274	0.00433214
cvrA	185.464	-0.573999	0.181759	-3.15803	0.0015884	0.00433732
ycaM	785.316	-0.348414	0.110328	-3.15798	0.00158866	0.00433732
yifK	415.506	0.407015	0.128867	3.15841	0.00158633	0.00433732
ydiI	173.377	-0.59301	0.187904	-3.15592	0.00159995	0.00436111
yeeJ	347.71	-0.435835	0.138102	-3.1559	0.00160006	0.00436111
pmbA	527.343	0.378386	0.119912	3.15553	0.00160204	0.00436284
wcaJ	303.979	-0.45883	0.145566	-3.15204	0.00162132	0.00441126
yahA	226.507	0.516966	0.164021	3.15182	0.00162255	0.00441126
ynfK	258.157	-0.490772	0.155985	-3.14628	0.0016536	0.0044919
ycjY	172.96	-0.591377	0.188021	-3.14527	0.00165935	0.00450374
ygeX	2171.53	0.349258	0.111121	3.14306	0.00167193	0.00453408
ydbJ	185.894	-0.569957	0.181598	-3.13857	0.00169776	0.00460029
narH	526.422	-0.378018	0.120523	-3.13649	0.00170986	0.00462919
yrhB	278.882	0.469459	0.149792	3.13407	0.001724	0.00466358
araG	182.263	-0.574192	0.183274	-3.13297	0.00173049	0.00467722
ycaP	658.028	-0.357118	0.114071	-3.13066	0.00174415	0.00471023
sgrR	1539.08	0.332243	0.106177	3.12914	0.00175319	0.00473069
mgsA	1311.26	-0.331157	0.105904	-3.12695	0.00176631	0.00476212
fucA	935.096	0.335736	0.107443	3.12477	0.00177942	0.00478948
yjiY	527.64	0.374694	0.119905	3.12493	0.00177848	0.00478948
gcvP	32.9286	-1.35177	0.433211	-3.12035	0.00180634	0.00485792
hycD	739.25	0.34658	0.111081	3.12005	0.00180822	0.00485893
mdtC	613.557	-0.361572	0.115896	-3.11979	0.00180981	0.00485917
yajL	981.845	-0.334029	0.107243	-3.1147	0.00184129	0.0049396
yegS	402.106	-0.40792	0.131016	-3.1135	0.0018488	0.00495564
proW	442.77	0.392952	0.126234	3.1129	0.00185261	0.00496176
ymcE	214.948	-0.527068	0.169391	-3.11155	0.00186111	0.00498038
yahB	286.946	0.460418	0.147994	3.11106	0.00186415	0.00498441
prpR	296.167	0.453711	0.146114	3.10519	0.00190155	0.00508021
artM	651.29	-0.354825	0.114319	-3.10383	0.00191036	0.00509114
narK	102.934	-0.755844	0.243504	-3.10403	0.00190907	0.00509114
yegU	678.717	-0.351788	0.113334	-3.104	0.00190921	0.00509114
yciG	86.5057	-0.822937	0.265297	-3.10195	0.00192253	0.00511937
aaeR	2148.87	0.343858	0.110876	3.10129	0.00192678	0.00512226
corA	913.055	0.334112	0.107725	3.10151	0.00192535	0.00512226
yfbO	4521.19	0.450681	0.14538	3.10003	0.00193503	0.00513996
yhdW	1660.23	0.3309	0.106768	3.09924	0.0019402	0.00514947
manZ	87.8551	-0.815642	0.263386	-3.09676	0.00195649	0.00518848
ydhO	99.6079	-0.766699	0.247649	-3.09591	0.00196212	0.00519914
ydfZ	87.1885	-0.817873	0.264212	-3.09551	0.00196472	0.00520178
yraJ	931.728	0.332636	0.107484	3.09476	0.00196975	0.00521083
pntA	95.4771	-0.782061	0.252801	-3.09359	0.00197752	0.00522712
yoaA	93.5217	-0.789293	0.255256	-3.09217	0.00198699	0.00524787
appB	639.303	-0.354599	0.114812	-3.08852	0.00201155	0.0053084
yeeZ	442.609	-0.391716	0.126881	-3.08726	0.00202008	0.00532656
macB	853.087	-0.336272	0.108959	-3.08622	0.00202719	0.00534095
eamA	85.1956	-0.8238	0.267203	-3.08305	0.00204892	0.00539381
intB	430.891	0.392274	0.127339	3.08054	0.00206626	0.00543067
ymfG	283.341	-0.461654	0.149861	-3.08054	0.00206627	0.00543067
yqjA	628.492	-0.355049	0.115268	-3.08021	0.00206855	0.00543225
ruvC	9.46892	-2.71346	0.881345	-3.07877	0.00207856	0.00545109
uxaA	2195.94	0.342911	0.111391	3.07845	0.00208077	0.00545109
ydcO	96.5913	-0.773421	0.251218	-3.07868	0.00207918	0.00545109
recQ	653.905	0.350225	0.113791	3.07779	0.00208541	0.00545881
yjdK	2058.81	0.337922	0.109941	3.07366	0.00211447	0.00553041
creA	2014.19	0.336333	0.109506	3.07136	0.00213089	0.00556842
cutA	455.544	0.38424	0.125113	3.07114	0.00213244	0.00556842
yrfD	2396.28	0.349316	0.113781	3.07007	0.00214006	0.00558381
mqo	1039.44	-0.326961	0.106746	-3.06298	0.00219143	0.00571324
cspA	1317.1	0.323542	0.10568	3.06152	0.00220219	0.00573668
cspB	38.4371	-1.21987	0.398618	-3.06025	0.00221155	0.00575283
pepB	338.377	0.424335	0.138663	3.06019	0.00221194	0.00575283
rnk	497.934	-0.374389	0.122412	-3.05843	0.00222502	0.00578219
paaC	295.607	-0.450057	0.147206	-3.05733	0.00223315	0.00579551
ydfR	26.5945	-1.47589	0.482751	-3.05726	0.00223372	0.00579551
ytjB	527.741	0.366301	0.119884	3.05546	0.00224714	0.00582566
pncA	553.831	-0.362426	0.118884	-3.04856	0.00229941	0.00595638
dsrB	477.332	-0.377797	0.123949	-3.04801	0.00230364	0.00596257
ligT	341.815	0.420848	0.138102	3.04736	0.00230858	0.00597009
ycjS	291.432	-0.451336	0.148118	-3.04715	0.00231023	0.00597009
yaaU	2753.43	0.361422	0.118628	3.04669	0.00231373	0.00597253
yqjC	1914.93	0.330868	0.108604	3.04655	0.00231486	0.00597253
ynfF	163.948	-0.587944	0.193004	-3.04628	0.00231691	0.00597305
soxR	1566.14	0.323269	0.106292	3.04132	0.0023554	0.00606745
ycdX	516.377	-0.368298	0.121132	-3.04047	0.00236212	0.00607992
ykgK	228.199	0.496999	0.163541	3.03899	0.00237373	0.00610494
ypdD	474.877	-0.377176	0.124151	-3.03805	0.00238114	0.00611914
yeeS	240.51	-0.488254	0.160869	-3.03511	0.00240448	0.00617423
ttdB	1005.63	0.323523	0.10673	3.03121	0.00243575	0.00624958
ubiX	2.45851	5.12673	1.69263	3.02885	0.00245483	0.00629353
yecD	124.749	-0.669858	0.221231	-3.02786	0.0024629	0.00630924
yncM	16.5619	-1.88543	0.62391	-3.02196	0.0025114	0.00642839
lhr	101.652	-0.738752	0.244897	-3.01658	0.00255644	0.00652819
yhaO	790.821	0.331306	0.109826	3.01665	0.00255583	0.00652819
ymfD	573.84	-0.355346	0.117786	-3.01687	0.00255397	0.00652819
yecF	262.416	-0.465798	0.154774	-3.00954	0.00261643	0.00667611
btuC	86.9413	-0.794699	0.264444	-3.00517	0.00265431	0.00676745
yoeB	394.326	-0.395797	0.131888	-3.001	0.00269093	0.00685542
erfK	63.6566	-0.925766	0.308608	-2.99981	0.00270148	0.00687688
nikA	337.996	0.416023	0.138749	2.99838	0.00271417	0.00690375
ybbN	610.703	-0.347714	0.116012	-2.99721	0.00272459	0.00692381
ydeN	44.5883	-1.10588	0.368993	-2.99702	0.00272633	0.00692381
rhsD	54.6044	-0.997428	0.333059	-2.99475	0.00274672	0.00697013
yhfG	3547.64	0.3907	0.130478	2.99437	0.00275013	0.00697331
ycdM	818.918	-0.328	0.109588	-2.99304	0.00276216	0.00699833
gatY	491.372	-0.36731	0.12288	-2.98919	0.0027972	0.00708158
dcm	370.966	-0.402497	0.134743	-2.98714	0.00281601	0.00712363
rlmB	623.067	-0.344834	0.115469	-2.98638	0.00282304	0.00713584
astB	279.353	-0.449409	0.150715	-2.98184	0.00286518	0.0072367
ydjF	107.301	-0.710668	0.238425	-2.98067	0.00287617	0.0072588
yjgL	508.651	0.360698	0.121108	2.97831	0.00289838	0.00730916
yfbW	724.872	-0.333114	0.111871	-2.97767	0.00290451	0.00731892
ycgJ	212.387	-0.506892	0.17027	-2.97699	0.0029109	0.0073293
yehK	63.1515	-0.92202	0.309784	-2.97633	0.00291721	0.00733949
smpB	10.1042	-2.48074	0.834925	-2.97121	0.00296633	0.00745727
rimL	67.6014	-0.888825	0.299355	-2.96914	0.00298639	0.00750189
abgT	113.441	-0.688396	0.231925	-2.96819	0.00299564	0.00751928
mviM	657.807	-0.337662	0.114071	-2.96012	0.0030752	0.00771301
ydcZ	42.3862	-1.11919	0.378416	-2.95756	0.00310083	0.00777129
gdhA	190.637	-0.529418	0.179268	-2.95323	0.00314471	0.00787514
hisI	926.789	-0.318255	0.107844	-2.95107	0.0031668	0.00791821
yadH	554.348	0.349221	0.118336	2.95109	0.00316656	0.00791821
mdtB	1240.18	-0.31198	0.105944	-2.94475	0.0032322	0.00806928
yfbG	510.712	-0.357863	0.121521	-2.94487	0.00323091	0.00806928
bglX	446.291	-0.372522	0.126515	-2.94449	0.00323492	0.00806986
yecH	236.909	-0.476698	0.161927	-2.9439	0.00324102	0.00807659
yraQ	740.158	0.326941	0.111063	2.94375	0.00324261	0.00807659
yjfP	1066.32	0.312836	0.106298	2.94301	0.0032504	0.00808978
yeeN	269.621	-0.449809	0.152918	-2.94151	0.00326616	0.00812275
ydcS	94.8623	-0.744643	0.253284	-2.93996	0.00328254	0.00815723
ydiE	71.9237	-0.853654	0.290396	-2.93961	0.0032862	0.00816007
vsr	190.565	-0.526843	0.179296	-2.93839	0.00329917	0.00818598
ycdT	410.711	-0.381754	0.130038	-2.9357	0.00332793	0.00825103
yaaH	1329.77	0.309934	0.105687	2.93257	0.00336166	0.00832827
argP	375.656	0.390874	0.133413	2.9298	0.00339185	0.00839663
ybfH	227.277	-0.483466	0.165036	-2.92946	0.00339551	0.00839928
yqjK	459.652	0.365361	0.124759	2.92853	0.00340564	0.00841792
slyA	137.826	-0.61571	0.210321	-2.92747	0.00341729	0.00844027
sgcB	495.43	0.356781	0.12203	2.92372	0.00345872	0.00853608
yceJ	4112.31	-0.406762	0.139218	-2.92177	0.00348046	0.00858319
add	102.118	-0.71391	0.244406	-2.921	0.00348915	0.00859808
yeiR	229.364	-0.479266	0.164251	-2.91789	0.0035241	0.00867759
ybjX	726.062	-0.326075	0.111824	-2.91597	0.00354589	0.00872462
ugd	78.1096	-0.811289	0.278536	-2.91269	0.00358333	0.00881004
livK	128.131	0.628939	0.216	2.91175	0.00359411	0.00882983
ydiD	240.442	-0.468047	0.160837	-2.91007	0.00361352	0.0088708
wzc	362.129	-0.394491	0.135944	-2.90186	0.00370951	0.00909955
fecE	850.773	0.315174	0.108662	2.90049	0.00372585	0.00913269
chbR	69.3519	-0.857064	0.295544	-2.89996	0.00373212	0.00914115
phoU	13498.7	0.702005	0.242251	2.89785	0.00375733	0.00918901
ycgB	556.365	-0.344005	0.118702	-2.89807	0.00375472	0.00918901
ccmC	268.398	-0.442166	0.153232	-2.88559	0.00390675	0.00954721
recD	833.634	0.314216	0.108967	2.88358	0.00393177	0.00960112
ygiC	839.588	0.313562	0.108861	2.88037	0.00397203	0.00969212
nanE	1263.9	0.30433	0.105693	2.87938	0.00398458	0.00971542
ygcM	1184.54	-0.305181	0.106054	-2.87759	0.00400731	0.00975614
yohO	262.216	-0.44551	0.15482	-2.87759	0.00400723	0.00975614
yeaN	42.0469	-1.09436	0.380359	-2.87719	0.00401238	0.00976114
yccX	252.213	-0.452556	0.1574	-2.87519	0.00403779	0.00981558
sbmC	172.294	-0.541119	0.188251	-2.87446	0.00404724	0.00982382
yjjQ	612.588	0.331922	0.115468	2.87458	0.00404566	0.00982382
narU	30.6589	-1.28621	0.447517	-2.87411	0.00405174	0.00982737
purT	89.6945	-0.747678	0.260344	-2.87189	0.00408031	0.00988924
fecR	583.06	0.335217	0.116838	2.86907	0.00411677	0.00997015
yjiD	447.73	0.360553	0.125768	2.86681	0.00414638	0.0100344
ydaW	121.115	-0.643022	0.224353	-2.86611	0.00415545	0.0100488
yeeF	367.154	-0.387131	0.135238	-2.8626	0.0042018	0.0101533
hybA	588.621	0.333083	0.116571	2.85733	0.00427218	0.0103157
yhhF	652.999	0.325095	0.113833	2.85588	0.00429178	0.0103553
bcr	447.73	-0.360839	0.126373	-2.85536	0.00429885	0.0103569
nudC	1946.78	0.310911	0.108884	2.85543	0.00429787	0.0103569
torR	290.685	-0.422503	0.148139	-2.85207	0.0043436	0.0104569
ompW	306.629	-0.41317	0.144942	-2.85059	0.00436386	0.0104902
yadS	668.863	0.322831	0.113251	2.85058	0.00436391	0.0104902
ydfH	74.1228	-0.813871	0.285617	-2.84952	0.00437854	0.0105176
yjiG	757.439	0.314984	0.110614	2.84758	0.00440526	0.0105739
fecC	864.921	0.308621	0.108426	2.84637	0.00442211	0.0105987
ynbC	55.364	-0.940509	0.330409	-2.8465	0.00442033	0.0105987
ybgP	228.626	-0.468078	0.164561	-2.8444	0.00444957	0.0106566
ytfI	624.783	0.326874	0.114929	2.84413	0.00445332	0.0106577
ssuB	59.0396	-0.909986	0.320009	-2.84362	0.00446036	0.0106667
flgD	656.343	-0.324367	0.114105	-2.84271	0.00447315	0.0106893
chaB	240.652	-0.456753	0.160745	-2.84148	0.00449051	0.0107229
fhuB	445.744	0.357783	0.125958	2.84048	0.00450454	0.0107485
yecC	132.475	-0.60912	0.214466	-2.84017	0.00450892	0.010751
yceH	518.99	-0.343098	0.120958	-2.83652	0.00456084	0.0108668
ychP	118.337	-0.643529	0.226898	-2.83621	0.00456524	0.0108693
rhtA	245.278	-0.452023	0.159405	-2.8357	0.00457261	0.0108788
ydiS	93.3119	-0.723291	0.25516	-2.83465	0.00458753	0.0109063
ycdS	78.7569	-0.785032	0.277215	-2.83185	0.00462793	0.0109943
ycdH	552.878	-0.336537	0.118894	-2.83056	0.00464665	0.0110307
zntR	499.77	0.344222	0.121709	2.82824	0.00468052	0.0111029
hlpA	418.671	0.363083	0.128531	2.82486	0.00473011	0.0112124
ydgG	181.624	-0.518145	0.183454	-2.82439	0.0047371	0.0112207
fdnG	122.304	-0.62989	0.223201	-2.82207	0.00477143	0.0112938
yhcF	1049.65	0.299883	0.106403	2.81838	0.00482672	0.0114163
ycdY	249.472	-0.445653	0.158184	-2.81731	0.00484282	0.011446
ydgD	9.22911	-2.44353	0.868734	-2.81275	0.00491195	0.0116009
cirA	736.238	-0.313568	0.111519	-2.81178	0.00492688	0.0116277
ybfM	943.339	-0.302441	0.107623	-2.81017	0.00495149	0.0116773
ytfF	498.965	0.341883	0.121779	2.80741	0.00499419	0.0117694
ypdG	586.605	-0.328548	0.117109	-2.80549	0.00502394	0.0118309
ybgF	191.367	-0.501666	0.178877	-2.80454	0.00503889	0.0118575
tyrB	811.458	0.306707	0.109392	2.80373	0.00505145	0.0118612
yacG	1765.09	0.301262	0.107436	2.80412	0.00504546	0.0118612
ydfD	51.3009	-0.961884	0.343065	-2.80379	0.00505054	0.0118612
pcnB	182.592	-0.511553	0.182896	-2.79697	0.00515846	0.0121037
gldA	719.279	0.311679	0.111651	2.79155	0.00524557	0.0122992
ycgI	340.861	-0.387635	0.139005	-2.78864	0.00529306	0.0124015
ldhA	95.1131	-0.70369	0.252799	-2.78359	0.00537602	0.0125868
idnK	430.444	0.35426	0.127355	2.78169	0.00540774	0.0126493
yhgE	408.919	0.360329	0.129544	2.78152	0.00541055	0.0126493
djlB	390.278	-0.367893	0.132305	-2.78064	0.00542524	0.0126716
sieB	51.0507	-0.955797	0.343753	-2.78048	0.00542788	0.0126716
napC	625.413	-0.320515	0.115342	-2.77883	0.00545553	0.0127269
xylE	562.239	0.327557	0.117904	2.77816	0.00546673	0.0127439
ymfB	395.768	-0.365727	0.131662	-2.77778	0.00547314	0.0127497
yagI	243.137	0.441274	0.15895	2.77619	0.00550009	0.0128032
ydhZ	313.739	-0.398564	0.143605	-2.77542	0.0055131	0.0128243
yncN	97.504	-0.692651	0.249744	-2.77344	0.00554666	0.0128931
argC	3149.83	0.344476	0.124437	2.76827	0.00563553	0.0130903
ydeU	112.953	-0.642145	0.232114	-2.76651	0.00566606	0.0131463
ygdE	1012.17	0.2951	0.106672	2.76641	0.00566778	0.0131463
idnR	467.784	0.342868	0.124102	2.76279	0.00573092	0.0132833
hisH	485.266	-0.340333	0.123283	-2.76058	0.00576982	0.0133621
yjiH	718.3	0.308253	0.11167	2.76039	0.00577318	0.0133621
yqhC	732.726	0.307012	0.111263	2.75932	0.00579217	0.0133965
soxS	1518.25	0.292573	0.106099	2.75755	0.00582364	0.0134596
lysA	915.982	-0.297428	0.107963	-2.75491	0.00587089	0.0135592
yjeM	695.536	0.309428	0.11236	2.75391	0.00588876	0.0135907
yeaA	245.265	-0.438502	0.159355	-2.75174	0.00592802	0.0136716
ydhT	106.459	-0.657634	0.239091	-2.75056	0.00594939	0.0137111
yjcE	2817.5	0.328672	0.119545	2.74937	0.00597099	0.0137511
ugpB	548.976	0.325935	0.11864	2.74727	0.00600941	0.0138158
yjiZ	481.037	0.338097	0.123073	2.74713	0.00601188	0.0138158
ypaA	530.838	-0.330186	0.120182	-2.74739	0.00600719	0.0138158
bdm	127.031	-0.601009	0.219004	-2.74428	0.00606441	0.0139266
pitA	440.072	-0.348529	0.127064	-2.74293	0.00608938	0.0139741
flhA	97.2006	-0.685592	0.250096	-2.74131	0.00611942	0.0140331
ychM	734.997	-0.304777	0.111551	-2.73218	0.00629161	0.0144177
ygaD	872.768	0.295818	0.108295	2.73159	0.00630303	0.0144337
icdC	178.426	-0.504217	0.184867	-2.72746	0.00638245	0.0146052
zupT	844.689	0.296626	0.108767	2.72716	0.00638824	0.0146081
potC	445.77	-0.344634	0.126531	-2.72371	0.00645529	0.014751
ydfC	24.8434	-1.35409	0.497465	-2.72197	0.0064894	0.0148185
hybO	471.17	0.336759	0.123825	2.71964	0.0065353	0.0149128
aroL	367.126	0.365831	0.134535	2.71924	0.0065433	0.0149206
kgtP	158.891	0.527565	0.194105	2.71794	0.00656899	0.0149686
fliN	181.511	-0.497933	0.183302	-2.71646	0.00659851	0.0150253
yoaC	83.2568	-0.73234	0.269677	-2.71562	0.00661522	0.0150528
ilvI	1556.03	0.288188	0.10625	2.71235	0.00668081	0.0151913
yhcO	3290.13	0.343139	0.126553	2.71143	0.00669927	0.0152226
cpsB	241.792	-0.434625	0.16033	-2.71081	0.00671196	0.0152399
uup	96.9243	0.670877	0.247506	2.71054	0.00671731	0.0152399
xapB	707.213	-0.304513	0.112352	-2.71036	0.006721	0.0152399
ddpB	52.4725	-0.918223	0.338906	-2.70938	0.00674098	0.0152745
yffH	1057.13	-0.288526	0.1066	-2.70663	0.006797	0.0153907
yhhY	252.742	0.421869	0.156196	2.70089	0.00691537	0.0156478
rihC	2057.2	0.296797	0.109927	2.69995	0.00693497	0.0156812
ycjX	190.445	-0.483714	0.179244	-2.69863	0.00696262	0.0157327
yagA	328.236	0.377895	0.140282	2.69382	0.0070638	0.0159502
ymcC	188.68	-0.484173	0.179989	-2.69002	0.00714477	0.0161218
dkgA	799.334	0.294675	0.109647	2.6875	0.00719896	0.0162328
serA	11.9836	-1.9791	0.737919	-2.682	0.0073184	0.0164906
yehB	126.611	-0.587596	0.21914	-2.68138	0.007332	0.0165098
yneG	76.8562	-0.751154	0.280403	-2.67884	0.0073878	0.0166238
oppB	222.54	-0.445188	0.166485	-2.67404	0.00749428	0.0168517
sgcC	430.634	0.340369	0.127351	2.67268	0.00752475	0.0169085
shiA	305.886	-0.386854	0.14502	-2.6676	0.00763958	0.0171503
ybcL	80.9889	-0.728305	0.273045	-2.66734	0.00764533	0.0171503
ycjW	75.297	-0.755056	0.283088	-2.66722	0.00764827	0.0171503
caiA	2330.7	0.301061	0.112965	2.66508	0.00769706	0.0172478
yjiP	420.985	0.341782	0.128285	2.66424	0.00771635	0.0172791
mdtG	225.227	-0.440298	0.165536	-2.65984	0.00781781	0.0174942
ydcN	96.2961	-0.667687	0.251167	-2.65834	0.00785277	0.0175603
fimF	597.718	0.30835	0.116135	2.6551	0.00792839	0.0177171
basR	629.971	0.304576	0.114725	2.65484	0.00793459	0.0177175
ddg	339.45	-0.369582	0.139221	-2.65463	0.00793952	0.0177175
baeR	439.162	-0.337319	0.127122	-2.65349	0.00796635	0.0177652
ybeA	757.028	-0.294247	0.110953	-2.652	0.00800167	0.0178304
yjdA	175.119	0.491214	0.185239	2.65179	0.00800662	0.0178304
yhbO	536.729	0.31604	0.119354	2.64792	0.00809895	0.0180236
yqjE	1451.84	0.280329	0.105886	2.64746	0.00810984	0.0180355
artI	382.514	-0.35235	0.133221	-2.64485	0.00817281	0.0181631
caiC	1337.07	0.279354	0.105692	2.6431	0.00821498	0.0182442
ypdF	501.384	-0.322323	0.12209	-2.64005	0.00828943	0.018397
ydfG	59.853	-0.837302	0.317242	-2.63932	0.00830727	0.0184239
yghS	456.498	0.329994	0.125046	2.63897	0.0083159	0.0184304
potB	887.863	-0.28572	0.108353	-2.63695	0.00836553	0.0185225
ynjC	209.009	-0.452021	0.171427	-2.63681	0.00836886	0.0185225
aaeX	280.879	0.39373	0.149347	2.63634	0.00838065	0.0185359
cysZ	759.914	-0.292153	0.110881	-2.63483	0.00841803	0.0186059
uxaB	141.46	-0.546237	0.207365	-2.63419	0.0084339	0.0186265
yfdV	212.247	-0.448152	0.170157	-2.63376	0.00844463	0.0186265
ygjR	1031.48	0.280575	0.106528	2.63382	0.00844311	0.0186265
uidA	23.2175	-1.35361	0.514263	-2.63215	0.00848472	0.0187022
yjbO	1172.27	0.278559	0.105863	2.63131	0.00850566	0.0187356
yfaH	360.57	-0.35801	0.136079	-2.6309	0.00851597	0.0187455
metI	148.21	-0.532785	0.202574	-2.63007	0.00853674	0.0187785
inaA	691.564	-0.296419	0.112855	-2.62654	0.00862584	0.0189616
fecD	566.905	0.308786	0.117659	2.6244	0.00868018	0.0190681
ynaI	252.922	-0.411782	0.15709	-2.62132	0.00875906	0.0192284
dinB	251.139	0.410631	0.156668	2.62103	0.00876639	0.0192314
agaS	727.613	0.291295	0.111401	2.61482	0.00892745	0.0195715
mdtJ	98.5414	-0.648879	0.24827	-2.61361	0.00895924	0.0196265
yjiA	813.537	0.285761	0.109354	2.61317	0.00897072	0.0196265
ymfE	107.161	-0.622261	0.238108	-2.61336	0.00896578	0.0196265
ycdQ	120.81	-0.586151	0.224354	-2.61261	0.0089854	0.0196453
ychQ	256.006	-0.408173	0.156315	-2.61122	0.00902186	0.0197079
yiaO	2409.79	0.297541	0.113954	2.61106	0.00902617	0.0197079
gntR	68.8316	0.763026	0.292342	2.61005	0.00905303	0.0197532
ycfP	452.723	-0.3283	0.125877	-2.60811	0.00910425	0.0198516
torY	147.322	-0.529785	0.20316	-2.60772	0.00911474	0.0198611
rstA	64.6238	-0.793845	0.305049	-2.60235	0.0092587	0.0201612
srmB	39.8182	-1.01249	0.389127	-2.60196	0.00926933	0.0201708
intR	733.614	-0.28999	0.111577	-2.599	0.00934947	0.0203315
polB	67.442	0.765669	0.295112	2.5945	0.0094728	0.0205859
speG	21.0859	-1.39948	0.539577	-2.59366	0.00949617	0.0206228
yecT	62.6367	-0.803237	0.309965	-2.59138	0.00955916	0.0207457
hisD	533.578	-0.310875	0.119993	-2.59077	0.00957601	0.0207544
yjiK	930.564	0.278515	0.107495	2.59095	0.00957108	0.0207544
wcaD	315.479	-0.370473	0.143239	-2.5864	0.00969831	0.0210054
ydcU	50.5852	-0.89062	0.344896	-2.58229	0.00981475	0.0212434
ybgA	544.219	-0.308114	0.119347	-2.58166	0.00983258	0.0212678
ycfH	234.416	-0.419423	0.162518	-2.58079	0.00985759	0.0213077
rpsO	2.3939	-4.35261	1.68773	-2.57898	0.00990938	0.0214053
pqqL	131.177	-0.555083	0.215412	-2.57685	0.00997054	0.0215231
chbA	106.217	-0.615769	0.239032	-2.5761	0.00999215	0.0215553
yjcH	881.596	0.278296	0.108172	2.57273	0.01009	0.021752
eutP	515.287	-0.311661	0.121153	-2.57246	0.0100978	0.0217544
osmC	101.549	-0.628897	0.24451	-2.57207	0.0101092	0.0217584
yjhC	368.673	0.345521	0.134343	2.57194	0.0101131	0.0217584
yggL	987.135	0.274766	0.106896	2.57041	0.0101579	0.0218402
wbbJ	63.0723	-0.79246	0.308661	-2.56741	0.0102462	0.0220153
ytfQ	626.644	0.294897	0.114877	2.56707	0.0102561	0.022022
tdh	1910.29	0.278576	0.108566	2.56595	0.0102893	0.0220787
lplA	1166.2	0.271649	0.105877	2.56572	0.0102963	0.022079
hisQ	81.9647	-0.695988	0.271445	-2.56401	0.0103469	0.0221729
mntR	211.683	-0.436218	0.170311	-2.56131	0.0104279	0.0223022
sdhB	888.906	0.276792	0.108051	2.56167	0.0104169	0.0223022
ycgN	179.03	-0.472619	0.184518	-2.56137	0.0104259	0.0223022
ygbE	498.087	-0.312345	0.122318	-2.55354	0.0106635	0.0227911
copA	1690.61	0.273062	0.106954	2.55308	0.0106775	0.0228059
yeiL	272.716	-0.387944	0.152067	-2.55114	0.0107373	0.0229184
ygjQ	836.115	0.277616	0.108929	2.5486	0.0108158	0.0230708
ydhY	78.3884	-0.705981	0.277289	-2.54601	0.0108962	0.023227
folX	112.868	0.58496	0.229788	2.54565	0.0109075	0.0232358
yfeA	462.4	-0.317759	0.125043	-2.54121	0.0110469	0.0235174
yafE	583.976	0.296469	0.116788	2.53852	0.0111324	0.0236837
yjiE	520.47	0.305394	0.120347	2.53761	0.0111613	0.0237297
yedX	206.839	-0.436284	0.172186	-2.5338	0.0112834	0.0239735
yedD	328.68	-0.356878	0.140899	-2.53287	0.0113134	0.0240216
garR	253.815	0.394624	0.155936	2.53068	0.0113841	0.0241558
qseC	89.6017	-0.657029	0.259885	-2.52815	0.0114664	0.0243145
yfeN	530.769	-0.303604	0.120154	-2.52679	0.0115109	0.0243928
yciE	148.499	-0.510448	0.202276	-2.52352	0.0116185	0.0246048
aqpZ	1587.5	-0.268824	0.106545	-2.52311	0.0116321	0.0246175
torC	300.362	-0.36816	0.146073	-2.52038	0.011723	0.0247936
yraH	499.017	0.306811	0.121765	2.51971	0.0117452	0.0248244
fliA	58.0721	-0.810196	0.321591	-2.51934	0.0117575	0.0248343
hsdM	527.344	0.302019	0.119912	2.51868	0.0117795	0.0248645
rfaZ	155.635	0.493588	0.196124	2.51672	0.0118453	0.024987
smpA	523.998	0.302168	0.120121	2.51553	0.0118854	0.0250554
ybbO	704.692	-0.282632	0.112421	-2.51405	0.0119354	0.0251443
leuA	2099.13	0.277307	0.110353	2.51291	0.0119739	0.0252091
csgB	192.357	-0.447494	0.178218	-2.51093	0.0120413	0.0253344
yccE	334.233	-0.35133	0.140015	-2.50924	0.0120992	0.0254233
ydeJ	36.0365	-1.02554	0.408694	-2.50931	0.0120966	0.0254233
deoA	1030.48	0.267133	0.106536	2.50743	0.0121612	0.025537
yedO	102.605	-0.608919	0.243099	-2.50482	0.0122514	0.0257097
yrbL	3289.15	0.316748	0.126538	2.50319	0.0123081	0.0258119
ldcC	1813.9	0.269753	0.107791	2.50255	0.0123302	0.0258416
recB	4.79313	-3.27925	1.31094	-2.50145	0.0123684	0.0259049
yodB	112.975	-0.578774	0.231875	-2.49607	0.0125579	0.0262847
ybhE	10.2459	-1.9928	0.799023	-2.49405	0.0126295	0.0264176
crcA	358.325	-0.339956	0.13634	-2.49344	0.0126512	0.0264458
btuE	149.334	-0.50215	0.201767	-2.48876	0.0128188	0.026779
glnL	622.452	-0.286969	0.115427	-2.48614	0.0129138	0.0269599
ychJ	96.9066	-0.621559	0.250053	-2.48571	0.0129293	0.0269748
ydfJ	75.4283	-0.700523	0.282387	-2.48072	0.0131117	0.0273378
glpK	15903.6	0.64093	0.258638	2.4781	0.0132085	0.0275106
minE	80.1798	-0.679152	0.274071	-2.47802	0.0132115	0.0275106
yadC	391.737	0.325656	0.131461	2.4772	0.0132419	0.0275384
zraP	3198.82	0.310095	0.125174	2.47731	0.0132377	0.0275384
mcrC	439.016	0.313349	0.126589	2.47532	0.0133116	0.0276656
ybcC	82.7902	-0.66686	0.269959	-2.47023	0.0135026	0.0280446
napD	725.21	-0.276058	0.111789	-2.46945	0.0135322	0.02807
ydcK	82.7988	-0.666872	0.270039	-2.46954	0.0135288	0.02807
yfbE	317.777	-0.35252	0.142774	-2.46908	0.0135462	0.0280811
fliK	151.347	-0.494421	0.200334	-2.46798	0.0135878	0.0281493
tas	1518.56	-0.262005	0.106257	-2.46577	0.013672	0.0283056
ymfC	317.896	-0.351966	0.142769	-2.46528	0.0136904	0.0283256
ybcI	258.546	-0.383482	0.155569	-2.46502	0.0137006	0.0283286
ybdD	339.308	-0.342961	0.1392	-2.4638	0.0137471	0.0284067
ydjM	57.0369	-0.79797	0.324203	-2.46133	0.0138424	0.0285852
yedW	84.2736	-0.657841	0.267598	-2.45832	0.0139588	0.0288073
aegA	835.235	-0.267738	0.109216	-2.45146	0.0142277	0.0293436
chaA	93.2329	-0.624157	0.254648	-2.45105	0.0142438	0.0293581
ybgK	609.276	-0.284174	0.115987	-2.45006	0.0142834	0.0294209
sufC	220.157	0.406662	0.166201	2.44681	0.0144126	0.0296682
ymfM	211.651	-0.416404	0.170319	-2.44484	0.0144914	0.0298115
yaaX	1349.56	0.258261	0.105704	2.44325	0.0145558	0.0299059
yraP	690.495	0.274954	0.112531	2.44337	0.0145509	0.0299059
yecR	221.459	-0.407239	0.166741	-2.44234	0.0145925	0.0299622
yceD	54.7881	-0.807088	0.330974	-2.43852	0.0147475	0.0302614
ycdG	398.712	-0.319701	0.131232	-2.43615	0.0148446	0.0304413
fliE	130.234	-0.525581	0.215873	-2.43468	0.0149052	0.0305461
hybG	744.947	0.269895	0.110945	2.4327	0.0149868	0.030694
potF	218.095	-0.408311	0.167931	-2.43142	0.0150399	0.0307833
ydaM	124.764	-0.535038	0.220637	-2.42497	0.0153097	0.0313156
yebW	62.8321	-0.747475	0.308944	-2.41945	0.0155439	0.0317748
aat	472.379	-0.300454	0.124218	-2.41876	0.0155734	0.0318149
ydgT	33.5045	-1.02414	0.423629	-2.41753	0.0156263	0.0319028
ytfJ	360.747	0.327158	0.135375	2.41667	0.0156631	0.0319578
yfaP	949.385	-0.25969	0.107522	-2.41523	0.0157255	0.0320649
spr	867.549	0.261726	0.108382	2.41484	0.0157422	0.0320771
ygaM	649.77	-0.275948	0.114292	-2.4144	0.0157612	0.0320771
yidF	2536.31	0.279162	0.11562	2.41447	0.0157583	0.0320771
dinI	30.69	-1.06828	0.442529	-2.41403	0.015777	0.0320892
tar	211.272	-0.411304	0.17041	-2.41361	0.0157952	0.032106
nrdI	565.958	-0.284813	0.118113	-2.41135	0.0158934	0.0322651
ogt	139.023	-0.503866	0.20895	-2.41142	0.0158906	0.0322651
napA	850.038	-0.26265	0.108946	-2.41083	0.0159161	0.0322909
metC	626.227	0.276682	0.114889	2.40826	0.016029	0.0324996
mcrA	154.192	-0.477898	0.198463	-2.408	0.0160403	0.0325022
ycaK	358.324	-0.328151	0.136319	-2.40722	0.0160744	0.0325509
ytfH	736.384	0.267454	0.111163	2.40597	0.0161296	0.0326422
uidC	117.224	-0.54656	0.227462	-2.40286	0.0162672	0.0329002
ycfT	191.353	-0.429097	0.178611	-2.40241	0.0162876	0.0329209
appA	100.944	-0.58816	0.244933	-2.40131	0.0163366	0.0329994
ydcC	230.773	-0.392828	0.163622	-2.40083	0.0163578	0.0330215
yehL	110.478	-0.561731	0.234311	-2.39737	0.0165132	0.0333145
yfdI	195.365	-0.423301	0.176834	-2.39378	0.0166758	0.0336215
ydhV	403.66	-0.312576	0.130666	-2.39217	0.0167491	0.0337484
ddpC	79.4816	-0.658024	0.27523	-2.39081	0.0168111	0.0338522
pphA	57.5562	-0.770914	0.322825	-2.38803	0.016939	0.0340886
yfbB	1360.55	-0.252693	0.105882	-2.38656	0.0170068	0.0342037
yhbX	1080.6	0.253443	0.106225	2.38591	0.0170371	0.0342435
ydfV	21.3977	1.24304	0.521344	2.38431	0.0171114	0.0343714
ybdM	619.829	-0.275367	0.115526	-2.3836	0.0171444	0.034395
yggC	422.924	0.305381	0.128116	2.38362	0.0171432	0.034395
chpB	492.666	0.291317	0.122234	2.38328	0.0171594	0.0344037
asr	197.166	-0.419221	0.17603	-2.38153	0.017241	0.034546
ccmG	253.487	-0.37364	0.15693	-2.38094	0.0172686	0.0345798
flhB	70.5647	-0.69283	0.291695	-2.37519	0.01754	0.0351016
yfdO	202.654	-0.412351	0.173761	-2.37309	0.0176398	0.0352797
ydiA	129.211	-0.513952	0.216679	-2.37195	0.0176944	0.035367
exoX	108.713	-0.559418	0.236107	-2.36934	0.0178196	0.0355953
paaJ	95.6142	-0.595881	0.251528	-2.36905	0.017834	0.0356021
cfa	182.534	0.428858	0.181499	2.36287	0.0181341	0.0361789
paaK	71.8756	-0.682685	0.289118	-2.36126	0.0182128	0.0363134
wcaA	569.535	-0.278218	0.117912	-2.35955	0.0182973	0.0364595
yghK	343.769	0.324989	0.137843	2.35767	0.0183899	0.0366215
ymfO	262.79	-0.363749	0.15445	-2.35513	0.0185163	0.0368505
ydiZ	165.563	-0.451012	0.191555	-2.35448	0.0185487	0.0368923
fliF	98.7433	-0.580392	0.247556	-2.34449	0.0190532	0.0378492
ybiJ	285.125	-0.349803	0.149195	-2.3446	0.0190477	0.0378492
cusC	528.33	0.280689	0.119842	2.34215	0.0191729	0.0380636
feaR	134.278	-0.497816	0.212639	-2.34114	0.0192251	0.038144
cbl	103.553	-0.565867	0.241742	-2.34079	0.0192429	0.0381559
kdpA	378.626	-0.312637	0.133621	-2.33972	0.0192981	0.0382419
yebQ	183.646	-0.425647	0.182134	-2.337	0.0194394	0.0384984
ygiF	620.703	-0.269851	0.115499	-2.33639	0.0194707	0.0385368
adiA	429.998	0.297545	0.127422	2.33511	0.0195375	0.0386296
ydhU	221.5	-0.389219	0.166687	-2.33504	0.0195415	0.0386296
sdaB	963.817	-0.250588	0.107358	-2.33413	0.0195889	0.0386997
cspI	19.266	-1.31285	0.562865	-2.33243	0.0196779	0.0388045
xylH	485.728	0.286346	0.122747	2.33282	0.0196576	0.0388045
yggT	793.774	0.256042	0.109773	2.33247	0.019676	0.0388045
rpe	13.9471	-1.5575	0.668383	-2.33025	0.0197931	0.0390005
tyrR	46.4678	-0.836707	0.359088	-2.33009	0.0198013	0.0390005
citX	200.837	-0.406441	0.174468	-2.3296	0.0198273	0.0390278
mltB	465.538	0.28906	0.12429	2.32569	0.0200351	0.039413
nirB	1595.63	-0.247594	0.106574	-2.32321	0.0201681	0.0396505
yeaC	459.654	-0.290491	0.125246	-2.31937	0.0203751	0.0400332
speC	705.27	0.25984	0.112064	2.31868	0.0204123	0.0400819
yjjK	1246.27	0.245075	0.105718	2.3182	0.0204386	0.0401092
ybdA	467.834	0.287594	0.124104	2.31736	0.020484	0.0401739
yfcE	55.5772	-0.76009	0.328039	-2.31707	0.0204999	0.0401807
yjbG	475.725	0.286077	0.123479	2.31681	0.0205142	0.0401846
sbmA	596.738	0.268908	0.116192	2.31434	0.0206493	0.0404247
kdgR	117.451	-0.525361	0.227224	-2.31208	0.0207732	0.0406268
ydeT	35.9207	-0.944824	0.408661	-2.312	0.0207776	0.0406268
tolR	14.2872	-1.52114	0.658376	-2.31045	0.0208634	0.0407699
hflK	1038.88	0.245844	0.10648	2.30883	0.0209531	0.0409205
yjjU	1230.14	0.243924	0.105737	2.30691	0.02106	0.0411044
glpQ	1087.53	-0.245168	0.106392	-2.30438	0.0212016	0.0413558
intE	76.992	-0.643609	0.279389	-2.30363	0.0212434	0.0414124
pflA	401.652	-0.301336	0.130858	-2.30277	0.0212918	0.041478
ybbB	917.907	0.247895	0.10766	2.30258	0.0213026	0.041478
gst	147.833	-0.466182	0.202575	-2.30128	0.0213756	0.0415694
yeaQ	86.3579	-0.607726	0.264107	-2.30106	0.0213881	0.0415694
yjfJ	270.362	0.349238	0.151766	2.30116	0.0213824	0.0415694
yeaK	51.6356	-0.781993	0.34012	-2.29917	0.0214955	0.0417531
ynjE	248.881	-0.363276	0.15815	-2.29704	0.0216165	0.041963
ybfC	185.874	-0.415013	0.180987	-2.29305	0.0218449	0.042381
metN	227.995	-0.377053	0.164473	-2.29249	0.0218772	0.0424182
ybjR	559.594	-0.271348	0.11842	-2.29141	0.0219399	0.0425143
ydiU	80.4068	-0.626607	0.273559	-2.29057	0.021988	0.0425636
yhdN	3890.58	0.310926	0.135745	2.29051	0.0219916	0.0425636
acs	1502.83	0.24268	0.106049	2.28837	0.0221157	0.0427527
xapR	755.089	-0.253935	0.110965	-2.28842	0.022113	0.0427527
yhhT	389.498	0.301389	0.131722	2.28808	0.0221331	0.0427607
rsxD	36.6873	-0.923002	0.403867	-2.28541	0.0222888	0.0430102
yadD	576.785	0.267768	0.117157	2.28554	0.0222811	0.0430102
racC	2.04717	4.06056	1.78049	2.28059	0.022573	0.0435068
yejF	211.176	-0.388639	0.170412	-2.28059	0.0225727	0.0435068
nanR	887.448	0.245918	0.108084	2.27524	0.0228917	0.0440947
yeeE	667.331	-0.258438	0.113628	-2.27442	0.0229407	0.0441629
htgA	1908.35	0.24672	0.108552	2.27282	0.0230369	0.0443217
prpC	77.6983	0.625231	0.275368	2.27053	0.0231756	0.0445621
ybhS	153.582	-0.451159	0.198723	-2.27029	0.02319	0.0445633
yeaP	42.8259	-0.848197	0.373714	-2.26964	0.0232293	0.0446124
gmd	472.682	-0.281426	0.124169	-2.26648	0.0234223	0.0449563
yafC	378.971	0.301251	0.133012	2.26484	0.0235228	0.0451224
ydaG	25.5976	-1.09883	0.48522	-2.26459	0.0235379	0.0451247
smf	5192.61	0.351842	0.155383	2.26436	0.0235521	0.0451253
fliI	90.6403	-0.584152	0.258037	-2.26383	0.0235843	0.0451603
slyX	1753.38	0.242734	0.10736	2.26094	0.0237629	0.0454753
ygjH	1002.83	0.241324	0.106764	2.26036	0.0237988	0.0455172
poxB	1029.94	-0.241132	0.106753	-2.25879	0.0238965	0.0456771
betB	246.662	0.356413	0.157899	2.25722	0.0239941	0.0458365
fklB	285.715	0.334563	0.148308	2.25587	0.0240787	0.045971
thrB	1892.02	0.244456	0.108415	2.25483	0.0241442	0.0460689
manA	199.39	-0.394592	0.175031	-2.25442	0.02417	0.046091
rlpA	487.981	-0.276597	0.122983	-2.24906	0.0245089	0.0466702
uxaC	949.53	0.24132	0.107285	2.24933	0.0244916	0.0466702
ydhM	246.56	-0.357107	0.15879	-2.24893	0.024517	0.0466702
yedP	198.58	-0.393894	0.175348	-2.24636	0.024681	0.0469548
sspA	441.65	-0.284798	0.126838	-2.24536	0.0247449	0.0470488
yghA	473.305	0.277648	0.123681	2.24487	0.0247762	0.0470806
yejA	424.363	-0.28834	0.128458	-2.24463	0.0247917	0.0470824
fimB	432.121	0.28479	0.12722	2.23856	0.0251847	0.0478007
murP	497.654	-0.273413	0.122274	-2.23608	0.0253468	0.0480803
ybiV	794.844	-0.245956	0.110008	-2.2358	0.0253649	0.0480864
yqfA	326.829	0.314114	0.140516	2.23543	0.0253889	0.0481037
yeeV	212.526	-0.379553	0.169819	-2.23504	0.0254146	0.0481242
btuR	246.58	-0.354465	0.158712	-2.23339	0.0255235	0.0483021
fadH	373.238	0.298483	0.133732	2.23194	0.0256188	0.0484542
yohN	380.829	-0.297167	0.133313	-2.22909	0.0258077	0.0487831
ydjN	197.997	-0.390751	0.175608	-2.22514	0.0260721	0.0492541
yegW	21.7341	-1.17268	0.527282	-2.22401	0.0261478	0.0493684
flgH	349.448	-0.305321	0.137564	-2.21948	0.0264541	0.0499175
mglC	186.146	-0.401366	0.180884	-2.21891	0.0264925	0.0499318
yfbK	239.922	-0.356484	0.160656	-2.21892	0.0264921	0.0499318
ybbS	343.963	-0.306881	0.138367	-2.21787	0.0265636	0.0500366
ybhQ	165.229	-0.425086	0.191728	-2.21713	0.0266142	0.0501028
clcB	66.0118	-0.667508	0.301106	-2.21685	0.0266331	0.0501093
yahJ	389.619	0.291832	0.131699	2.2159	0.0266985	0.0502031
tdcF	920.282	0.238426	0.107631	2.21522	0.026745	0.0502614
ypdC	174.989	-0.412207	0.186379	-2.21166	0.0269902	0.0506927
recE	7.72377	-2.02763	0.917722	-2.20942	0.0271457	0.0509312
yfcA	126.033	-0.484607	0.219341	-2.20937	0.0271486	0.0509312
ybgH	941.311	-0.237555	0.107594	-2.2079	0.0272516	0.0510947
hisF	434.046	-0.281421	0.127501	-2.20721	0.0272997	0.0511258
napF	477.8	-0.273141	0.123742	-2.20735	0.0272899	0.0511258
yidH	4001.55	0.303284	0.13745	2.2065	0.0273487	0.0511583
yjhV	1031.22	0.235089	0.106535	2.20669	0.0273356	0.0511583
ygdB	1019.86	-0.235588	0.106829	-2.20527	0.0274348	0.0512898
yjgZ	324.906	0.310172	0.140841	2.20228	0.0276453	0.0516534
galK	195.567	0.386574	0.175619	2.20121	0.0277211	0.0517653
clpP	153.541	-0.437499	0.198859	-2.20004	0.0278038	0.0518898
amiB	1751.02	-0.236324	0.107466	-2.19907	0.027873	0.051989
solA	271.833	-0.334365	0.152145	-2.19767	0.0279727	0.0521449
ycbW	123.149	-0.487117	0.221832	-2.19588	0.0281007	0.0523533
yhdX	2053.22	0.240908	0.109891	2.19224	0.0283619	0.0528096
mtlR	1702.69	0.234124	0.10703	2.18746	0.0287092	0.0534256
fumC	157.32	-0.428918	0.196334	-2.18464	0.0289155	0.0537785
ompN	63.0663	-0.671711	0.307815	-2.18219	0.0290956	0.0540824
ybgE	67.8623	-0.646629	0.296885	-2.17804	0.0294028	0.054622
htpX	138.97	-0.454176	0.20879	-2.17527	0.0296096	0.0549445
yfjD	338.239	0.301614	0.138666	2.17511	0.029622	0.0549445
yojL	615.681	-0.251619	0.115685	-2.17504	0.0296273	0.0549445
yobH	34.9472	-0.898322	0.413245	-2.17382	0.0297185	0.0550821
yraR	590.124	0.253119	0.116507	2.17256	0.0298135	0.0552265
creC	942.505	0.233219	0.107366	2.1722	0.0298409	0.0552458
cof	1533.6	0.230526	0.106161	2.17148	0.0298951	0.0552876
ybfQ	195.083	-0.383986	0.176834	-2.17144	0.0298976	0.0552876
dinJ	191.175	0.385352	0.177512	2.17086	0.029942	0.0553379
prmA	1255.99	-0.229762	0.105873	-2.17017	0.029994	0.0554025
yjfF	614.549	0.250071	0.115393	2.16713	0.0302252	0.0557976
yecA	326.48	-0.305555	0.141183	-2.16425	0.0304454	0.0561722
puuD	568.844	-0.254977	0.117915	-2.16238	0.0305888	0.0563726
rffG	875.927	0.23413	0.108266	2.16255	0.0305755	0.0563726
citT	480.529	-0.267043	0.123529	-2.16178	0.0306349	0.0564253
rrmA	127.577	-0.470963	0.217949	-2.16088	0.0307044	0.0565213
yecE	154.336	-0.428256	0.198264	-2.16003	0.0307705	0.0566107
lsrD	21.5703	-1.14054	0.528437	-2.15833	0.0309019	0.0568202
gntP	464.003	0.268375	0.124425	2.15692	0.0310119	0.0569625
yegP	325.85	-0.304731	0.141283	-2.15689	0.0310145	0.0569625
fixA	1924.62	0.234408	0.108693	2.1566	0.0310366	0.0569708
hofC	1245.65	0.227834	0.10572	2.15508	0.0311555	0.0571566
yciC	115.479	-0.492591	0.22889	-2.15208	0.0313908	0.0575558
yjfI	365.703	0.289857	0.134706	2.15178	0.0314146	0.0575667
yfiF	475.859	0.265572	0.123481	2.15071	0.0314993	0.0576567
yoeA	167.787	-0.409299	0.19029	-2.15092	0.0314825	0.0576567
yafJ	263.13	0.330095	0.153524	2.15013	0.0315453	0.0577083
ymbA	150.047	-0.431564	0.200953	-2.14759	0.0317463	0.0580432
ygiQ	1116.09	0.22766	0.106063	2.14646	0.031836	0.0581745
setB	379.213	-0.286087	0.133496	-2.14304	0.0321096	0.0586412
yehW	227.895	-0.352372	0.164493	-2.14217	0.0321796	0.0587358
wzb	200.24	-0.373708	0.174663	-2.1396	0.0323875	0.0590821
rtcR	160.204	0.412718	0.193344	2.13463	0.0327911	0.0597847
yeiU	201.233	-0.371447	0.174247	-2.13173	0.0330291	0.0601847
yfdX	115.481	-0.488023	0.228994	-2.13116	0.0330761	0.0602174
ygjN	948.828	0.228645	0.107292	2.13106	0.0330842	0.0602174
ilvH	1777.58	0.229122	0.107529	2.13079	0.0331064	0.0602239
ybjH	498.711	-0.260267	0.122197	-2.1299	0.0331797	0.0603233
yfjF	224.253	-0.352532	0.165683	-2.12775	0.0333579	0.0606132
ynfA	49.8662	-0.734973	0.346058	-2.12384	0.0336835	0.0611706
yjgB	107.595	0.499343	0.235222	2.12285	0.0337661	0.0612863
yadB	241.594	-0.339778	0.160172	-2.12133	0.0338936	0.0614833
pfkB	129.617	-0.458101	0.216174	-2.11914	0.034079	0.0617503
ydeS	17.2996	-1.25394	0.591716	-2.11915	0.0340777	0.0617503
ydhW	177.508	-0.392034	0.185043	-2.11861	0.0341238	0.061797
ygfS	1339.2	0.223759	0.105699	2.11694	0.0342652	0.0620183
intS	152.927	-0.42104	0.199022	-2.11555	0.0343835	0.0621977
yeiI	458.968	-0.264733	0.125253	-2.1136	0.0345498	0.0624636
dacD	246.232	-0.335278	0.158785	-2.11152	0.0347275	0.0627498
ygfY	149.366	0.421666	0.200134	2.10691	0.0351251	0.0633975
ymcD	284.291	-0.31452	0.149276	-2.10697	0.03512	0.0633975
agaI	516.051	0.253738	0.120632	2.10341	0.0354304	0.0639128
yehR	503.806	-0.256049	0.121835	-2.10161	0.035587	0.0641597
tsr	690.672	0.23642	0.112534	2.10087	0.0356525	0.064242
yeiM	444.365	-0.265606	0.126505	-2.09957	0.0357668	0.0644121
ybfA	823.519	0.229129	0.109164	2.09894	0.0358221	0.0644758
eutL	818.979	-0.229696	0.109497	-2.09774	0.0359282	0.0646308
ycfZ	289.177	-0.310666	0.148227	-2.09588	0.0360932	0.0648916
yeaR	79.2842	-0.576074	0.275108	-2.094	0.0362603	0.0651559
yfaQ	316.329	-0.299214	0.142936	-2.09335	0.0363181	0.0652234
ydjY	99.0619	-0.516479	0.246788	-2.0928	0.0363667	0.0652745
ycbB	250.169	-0.329992	0.157723	-2.09223	0.0364182	0.0653308
ydcM	56.3203	-0.680174	0.325406	-2.09023	0.0365969	0.065615
hybF	216.431	0.349475	0.16749	2.08655	0.0369292	0.0661742
leuO	550.22	0.24736	0.118576	2.08609	0.0369702	0.066211
lipA	1.30998	4.17522	2.00525	2.08215	0.0373288	0.0668163
gntK	110.469	0.48319	0.232186	2.08104	0.0374298	0.066934
ybhT	324.559	-0.294461	0.141517	-2.08075	0.0374566	0.066934
yeaI	234.648	-0.337676	0.162272	-2.08093	0.0374404	0.066934
narW	88.1713	-0.543322	0.261205	-2.08006	0.0375202	0.0669822
yjiX	543.622	0.247407	0.118945	2.08001	0.0375249	0.0669822
ymdF	204.135	-0.359768	0.173024	-2.0793	0.0375901	0.0670616
ybgC	55.9168	-0.678459	0.326678	-2.07685	0.0378159	0.0674272
kbaY	889.934	0.224335	0.108052	2.07617	0.0378779	0.0675006
lysP	411.864	0.268256	0.129241	2.07562	0.0379288	0.0675541
fliZ	337.632	-0.289092	0.139349	-2.07459	0.0380248	0.0676879
yhdE	2299.74	0.233458	0.112595	2.07343	0.0381327	0.0678281
yjjZ	326.828	0.291305	0.140504	2.07329	0.0381455	0.0678281
yidQ	2075.12	0.228169	0.110113	2.07214	0.0382523	0.0679807
galT	538.11	-0.247676	0.119631	-2.07034	0.0384207	0.0682426
flgC	250.622	-0.325606	0.157568	-2.06644	0.0387868	0.0688552
tehB	98.0605	-0.511678	0.247888	-2.06415	0.0390036	0.0692021
hyfD	1003.14	-0.220246	0.106951	-2.05932	0.0394637	0.06998
ydiR	62.7227	-0.634448	0.308443	-2.05694	0.039692	0.0703463
mdoD	92.8938	-0.523528	0.254664	-2.05576	0.0398053	0.0705086
smg	4681.4	0.302591	0.147797	2.04735	0.0406242	0.0719197
ygeM	508.644	-0.248605	0.121478	-2.0465	0.0407074	0.0720276
yahI	342.11	0.282428	0.138072	2.04552	0.0408038	0.0721587
wcaL	249.218	-0.323065	0.157969	-2.04511	0.040844	0.0721904
hofB	454.326	0.255987	0.125235	2.04406	0.0409475	0.0723338
ydbL	46.7181	-0.728187	0.356812	-2.04082	0.041269	0.0728621
yegH	395.191	-0.267752	0.131559	-2.03523	0.0418277	0.0738082
ydhK	112.425	-0.471149	0.231944	-2.03131	0.042224	0.0744669
yohC	1201.31	-0.215052	0.105954	-2.02967	0.0423896	0.0747184
yhjK	867.406	0.219865	0.108402	2.02823	0.0425365	0.0749364
oxc	133.572	-0.431502	0.212861	-2.02716	0.0426465	0.0750894
yeaV	38.2689	-0.798815	0.394459	-2.02509	0.0428581	0.0753799
yegL	554.119	-0.240367	0.118693	-2.02512	0.0428551	0.0753799
rsxB	28.9259	-0.918782	0.454005	-2.02372	0.0429986	0.075586
ytfL	137.084	0.422535	0.20882	2.02344	0.0430279	0.0755964
ydbC	115.126	-0.462449	0.229122	-2.01835	0.0435545	0.0764803
ynbE	70.6113	-0.58693	0.290982	-2.01707	0.0436887	0.0766743
xthA	413.493	-0.260978	0.129521	-2.01495	0.04391	0.0770209
cysQ	1.23166	4.10236	2.03702	2.0139	0.0440203	0.0771725
hybB	595.066	0.234129	0.116281	2.01347	0.044065	0.0772091
ydfT	82.7623	-0.541338	0.269231	-2.01068	0.0443589	0.0776821
ccmB	500.637	-0.245048	0.122047	-2.00782	0.0446621	0.0781707
ygcG	420.073	-0.258529	0.128848	-2.00646	0.0448067	0.0783815
cspH	78.9695	-0.552293	0.275305	-2.00611	0.0448442	0.0784047
malX	74.5884	-0.568221	0.283284	-2.00583	0.0448741	0.0784147
yjfK	243.245	0.318528	0.158875	2.0049	0.0449742	0.0785472
fepA	761.424	0.221462	0.110525	2.00373	0.045099	0.0787227
ydiT	135.407	-0.423551	0.211438	-2.00319	0.0451565	0.0787806
ycaC	595.626	-0.233288	0.116554	-2.00154	0.0453341	0.0790053
yraN	103.747	-0.482858	0.241239	-2.00157	0.0453311	0.0790053
malI	47.5678	-0.707577	0.353587	-2.00114	0.0453776	0.0790346
yjhX	637.734	0.228981	0.114437	2.00093	0.0453997	0.0790346
yjjP	1115.51	0.212047	0.106068	1.99916	0.0455912	0.0793252
torZ	337.957	-0.278357	0.139263	-1.99879	0.0456312	0.0793523
ybjO	260.641	-0.309338	0.154852	-1.99764	0.0457561	0.0795267
pmrD	623.459	-0.230298	0.115309	-1.99723	0.0458006	0.0795613
gadC	139.813	-0.415144	0.207999	-1.99589	0.0459457	0.0797516
yqcD	1281.35	-0.211234	0.105841	-1.99577	0.0459594	0.0797516
puuA	477.834	-0.246805	0.1237	-1.9952	0.0460216	0.0797741
yhaH	709.876	0.223325	0.111925	1.9953	0.0460097	0.0797741
rimK	548.746	-0.237254	0.118998	-1.99376	0.0461783	0.0800028
yfbF	342.413	-0.275869	0.138607	-1.9903	0.046558	0.0806175
ydiK	186.353	-0.359374	0.180682	-1.98898	0.0467033	0.0808259
fliH	217.83	-0.333651	0.167793	-1.98847	0.0467602	0.080872
ydfA	6.39793	-2.00271	1.00726	-1.98829	0.0467799	0.080872
fhuF	447.28	0.249968	0.12584	1.9864	0.046989	0.0811901
iaaA	360.326	-0.269131	0.135953	-1.97958	0.0477503	0.0824615
hflX	1556.44	0.210311	0.106261	1.9792	0.0477934	0.082492
yeaB	85.0586	-0.525726	0.265687	-1.97874	0.0478453	0.0825376
atoA	638.394	-0.226631	0.114685	-1.97612	0.0481417	0.0829652
ynjD	115.077	-0.452963	0.229222	-1.97609	0.0481444	0.0829652
eco	285.879	-0.293371	0.148913	-1.97009	0.0488285	0.0840688
ybhK	151.422	-0.393988	0.199992	-1.97001	0.0488368	0.0840688
ydaO	156.638	-0.387233	0.196661	-1.96904	0.0489488	0.0842168
yhaI	976.185	0.210445	0.107007	1.96664	0.0492249	0.0846469
deoC	1090.52	-0.208968	0.106351	-1.96489	0.0494272	0.0849497
tus	59.1859	-0.622774	0.317112	-1.96389	0.0495424	0.0851026
ssuE	264.897	-0.301832	0.153793	-1.96258	0.0496944	0.0853184
yoaG	58.9947	-0.622232	0.317718	-1.95844	0.0501784	0.0861037
idi	1193.81	0.207075	0.105811	1.95702	0.0503448	0.0862977
yhbV	136.735	0.409102	0.209029	1.95715	0.0503295	0.0862977
narZ	95.6735	-0.490831	0.250956	-1.95584	0.0504836	0.0864899
trmC	359.07	-0.266014	0.136151	-1.95382	0.0507222	0.0868528
hycI	742.643	-0.217248	0.11125	-1.95279	0.0508446	0.0869244
rspA	176.34	-0.36228	0.185516	-1.95283	0.0508402	0.0869244
ydcE	95.0149	-0.491734	0.251802	-1.95286	0.0508362	0.0869244
yneJ	32.6506	-0.832685	0.426621	-1.95182	0.0509601	0.0870759
stfQ	22.1478	-1.0127	0.519607	-1.94898	0.0512981	0.0876073
codA	619.545	-0.224855	0.115462	-1.94744	0.0514821	0.0878752
tatE	451.953	-0.24468	0.125803	-1.94494	0.0517817	0.0883399
ydaF	12.4338	-1.36153	0.70012	-1.9447	0.0518106	0.0883427
ymgE	173.883	-0.363181	0.186804	-1.94418	0.0518733	0.088403
rph	670.624	-0.220378	0.113487	-1.94188	0.0521519	0.088831
amn	28.4074	-0.885917	0.457055	-1.93831	0.0525849	0.0895215
mppA	45.185	-0.70264	0.36265	-1.93751	0.0526827	0.0896409
ycgM	37.6038	-0.769867	0.397549	-1.93654	0.0528021	0.0897968
yacF	400.462	0.252473	0.130503	1.93461	0.0530384	0.0901513
pppA	502.495	0.234945	0.121546	1.93298	0.0532391	0.090445
ycaI	339.859	-0.268286	0.138957	-1.93071	0.0535193	0.0908734
garD	705.958	0.21593	0.112051	1.92707	0.0539708	0.091592
pepP	466.252	-0.240036	0.124633	-1.92595	0.0541109	0.0917747
yeiC	70.3211	-0.561188	0.291412	-1.92575	0.0541352	0.0917747
pcm	280.982	-0.288118	0.14998	-1.92104	0.0547264	0.0927285
dcrB	217.767	0.320562	0.167	1.91954	0.0549159	0.0930009
acrA	1.49079	-3.66827	1.91208	-1.91847	0.0550509	0.0931808
pflB	774.237	-0.211834	0.110452	-1.91788	0.0551265	0.09326
yceP	237.871	-0.308869	0.161191	-1.91617	0.0553433	0.0935778
yhaM	918.962	0.206229	0.107658	1.9156	0.055416	0.0936519
fliC	205.138	-0.330404	0.172581	-1.91449	0.0555573	0.0938418
hyfC	758.044	-0.212146	0.110844	-1.91391	0.0556318	0.0938696
ybiR	203.881	-0.331351	0.173127	-1.91392	0.0556298	0.0938696
yphB	581.106	-0.224154	0.117254	-1.91169	0.0559158	0.0942996
napG	581.848	-0.223953	0.117225	-1.91045	0.0560754	0.0945196
yqjD	582.448	0.22322	0.116884	1.90976	0.0561647	0.0946208
yjjB	578.497	0.223257	0.117079	1.9069	0.0565338	0.0951932
yggF	595.481	0.221628	0.116264	1.90624	0.0566196	0.0952881
gadW	1272.75	0.201305	0.105702	1.90445	0.0568511	0.0955049
yccS	157.795	-0.373157	0.19595	-1.90434	0.0568654	0.0955049
yceK	186.154	-0.344193	0.180686	-1.90492	0.0567901	0.0955049
yedK	125.846	-0.417292	0.219127	-1.90434	0.0568664	0.0955049
alx	672.215	0.215416	0.113157	1.9037	0.056949	0.0955941
pal	48.2558	-0.667115	0.350682	-1.90233	0.0571277	0.0958443
yneF	45.6885	-0.684935	0.360532	-1.89979	0.0574607	0.096353
napH	664.151	-0.215959	0.113711	-1.89919	0.0575399	0.096386
yhbQ	760.211	0.210019	0.110574	1.89936	0.0575175	0.096386
cmtB	220.207	0.314728	0.166147	1.89427	0.0581893	0.0974235
yehX	327.681	-0.266729	0.14093	-1.89264	0.0584064	0.0977364
edd	202.335	-0.328569	0.1737	-1.89159	0.0585452	0.0979181
yddW	102.552	-0.458321	0.242541	-1.88966	0.0588028	0.0982982
ykgE	312.276	0.269915	0.143025	1.88718	0.0591359	0.0988039
uidB	40.676	-0.719628	0.381658	-1.88553	0.0593582	0.0990731
yfeX	1206.73	-0.199743	0.10593	-1.88561	0.0593474	0.0990731
ycjO	110.318	-0.440772	0.233969	-1.88389	0.0595805	0.0993929
yqjB	1614.14	0.200548	0.106531	1.88254	0.0597629	0.0996458
yjhI	562.635	0.22187	0.117915	1.88162	0.0598882	0.0998034
cadB	336.597	0.261223	0.138944	1.88006	0.0601001	0.100077
kil	4.65175	2.1294	1.13269	1.87996	0.060114	0.100077
mfd	876.522	0.203463	0.10825	1.87956	0.0601681	0.100115
ymfI	289.996	-0.277945	0.14795	-1.87864	0.0602936	0.100273
yliC	295.493	-0.275754	0.146907	-1.87706	0.0605097	0.10058
rsxG	17.4948	-1.09631	0.585141	-1.87357	0.060989	0.101325
pps	110.455	-0.437921	0.233781	-1.87321	0.0610391	0.101356
djlC	485.77	-0.230233	0.123093	-1.87041	0.0614271	0.101948
yehI	281.575	-0.279994	0.149829	-1.86876	0.0616559	0.102276
yacL	997.057	0.199226	0.106822	1.86502	0.0621786	0.10309
ypfN	1142.14	-0.197795	0.106119	-1.8639	0.0623362	0.103298
astE	57.9054	-0.595816	0.320185	-1.86085	0.062766	0.103956
ynjF	175.529	-0.345987	0.185952	-1.86062	0.0627976	0.103956
ygiL	464.503	0.231328	0.124391	1.85969	0.0629294	0.104121
djlA	1465.49	0.196962	0.105934	1.8593	0.0629846	0.104159
pykA	377.859	-0.248019	0.133619	-1.85617	0.0634293	0.104841
yqgE	421.673	-0.238757	0.128679	-1.85545	0.0635313	0.104956
yfdL	141.205	0.381227	0.205674	1.85355	0.0638036	0.105352
ydcT	42.4614	-0.690797	0.373652	-1.84877	0.064491	0.106433
yciF	131.651	-0.395705	0.214234	-1.84707	0.064737	0.106785
rcsA	163.053	-0.355635	0.192714	-1.8454	0.0649794	0.10713
fimG	477.678	0.227569	0.123341	1.84504	0.0650312	0.107161
yajB	549.458	-0.219313	0.118941	-1.84388	0.065201	0.107386
ompG	47.6609	-0.64994	0.352825	-1.8421	0.06546	0.107758
glpT	458.897	-0.230657	0.12523	-1.84187	0.0654937	0.107758
yjeS	884.619	-0.199506	0.108332	-1.84163	0.0655297	0.107763
ygaU	675.333	-0.208116	0.113297	-1.8369	0.0662245	0.10885
ydeA	18.8923	-1.03217	0.562007	-1.83657	0.066273	0.108875
fhuD	561.339	0.216514	0.117974	1.83527	0.0664662	0.109137
osmY	1317.26	0.193913	0.105693	1.83467	0.0665539	0.109225
yghT	575.294	0.215042	0.117254	1.83399	0.0666553	0.109336
yggV	302.652	0.26558	0.144841	1.83359	0.0667146	0.109378
hokE	499.904	-0.223739	0.122078	-1.83276	0.0668377	0.109525
hyfI	49.7674	-0.631756	0.345373	-1.8292	0.0673696	0.11034
yqhG	713.749	0.204454	0.111825	1.82833	0.0674999	0.110498
yfgA	2.62406	-2.97344	1.62809	-1.82634	0.0677988	0.110931
yjhR	620.449	0.210155	0.115137	1.82527	0.067961	0.11114
yniA	148.577	-0.368016	0.201759	-1.82404	0.0681467	0.111388
yfhG	154.774	-0.360587	0.197743	-1.82352	0.0682253	0.11146
ssuD	427.406	-0.23344	0.128077	-1.82265	0.0683565	0.111618
yfcV	46.4434	-0.650941	0.357282	-1.82192	0.0684665	0.111741
rsmB	1640.89	0.194225	0.106673	1.82075	0.0686455	0.111921
yfiR	31.7617	-0.7866	0.431974	-1.82094	0.0686155	0.111921
yphE	158.52	-0.355655	0.195391	-1.82022	0.0687262	0.111996
yfdY	240.919	-0.291546	0.160234	-1.8195	0.0688355	0.112117
yadG	550.037	0.215688	0.118602	1.81858	0.0689754	0.112257
ygaY	428.332	0.232026	0.127593	1.81848	0.0689906	0.112257
artP	436.908	-0.230969	0.12717	-1.81623	0.069335	0.112761
yfiB	551.364	0.214652	0.118531	1.81093	0.0701522	0.114033
ydgR	101.248	-0.44092	0.243908	-1.80774	0.0706477	0.11478
dgsA	94.8427	-0.454897	0.251818	-1.80645	0.0708475	0.115047
creD	312.019	0.25844	0.143102	1.80598	0.0709216	0.11511
atoB	1059.34	-0.192051	0.10652	-1.80295	0.0713954	0.115821
malY	126.55	-0.393574	0.218528	-1.80102	0.0716993	0.116256
ydaT	69.6628	-0.526453	0.292586	-1.79931	0.07197	0.116598
yddE	102.267	-0.436653	0.242689	-1.79923	0.0719828	0.116598
[truncated: 1,239 more rows]

## Sheet: commonRES_oriOdd_vs_valOdd
geneID	log2FC-original_libOdd	Padj-orginal_libOdd	log2FC-validation_libOdd	Padj-validation_libOdd
'nadA'	5.52761	0.000294297	9.44418	5.43e-18
'nupC'	7.21386	6.9e-169	8.80384	8.56e-297
'rfaE'	5.05062	6.9e-169	7.91977	2.36e-12
'ompR'	4.93266	4.25e-258	6.96214	6.9e-169
'yieP'	5.7785	6.9e-169	6.90684	6.9e-169
'gmhB'	5.40219	6.9e-169	6.8882	7.83e-10
'envZ'	5.15631	6.9e-169	6.78231	6.9e-169
'yohK'	5.24311	6.9e-169	6.66352	6.9e-169
'yohJ'	5.07771	6.9e-169	6.52608	6.9e-169
'rfaD'	5.21874	6.9e-169	6.31838	1.47e-40
'nadB'	5.95127	1.29e-18	6.30888	5.58e-169
'nadC'	7.03563	1.19e-07	6.10232	2.6e-114
'hfq'	6.5532	1.32e-58	6.00207	1.68e-09
'ybfE'	5.33093	6.9e-169	5.93791	6.9e-169
'ptsI'	5.14555	0.00147097	5.76077	0.000126297
'yjjY'	4.06999	7.39e-133	5.69908	4.57e-13
'aceF'	6.30779	3.7e-18	5.61228	6.24e-06
'cmk'	4.99582	0.000145163	5.56304	0.000335611
'lpcA'	4.90585	6.9e-169	5.51164	1.06e-05
'yraO'	4.78774	6.9e-169	5.33687	6.9e-169
'rfaH'	4.68149	6.9e-169	5.23779	6.9e-169
'arcA'	4.32452	3.33e-117	5.07991	1.14e-19
'rfaF'	4.80255	6.9e-169	5.01373	5.48e-57
'fabH'	6.02469	3.98e-07	4.83244	0.00616126
'poxA'	4.23998	6.9e-169	4.80848	6.9e-169
'bioC'	7.58199	2.66e-08	4.56993	1.88e-27
'sodA'	4.1894	3.67e-97	4.38862	6.9e-169
'cytR'	4.14374	6.9e-169	4.25513	6.9e-169
'rfaG'	4.18569	6.9e-169	4.18736	6.9e-169
'bioF'	5.75461	2.26e-06	3.73926	1.59e-28
'bioD'	5.07748	0.000119059	3.72668	3.95e-24
'ihfA'	4.36332	1.13e-230	3.6241	2.67e-14
'bioH'	7.05314	1.07e-07	3.39775	1.78e-37
'rfaC'	5.0271	6.9e-169	3.33315	0.100528
'fadR'	4.1	6.9e-169	3.24787	6.9e-169
'trkA'	4.21188	1.8e-293	3.18582	6.9e-169
'panB'	5.19335	0.00626319	3.09462	4.36e-06
'fepG'	4.07739	0.037018	3.04541	6.91e-08
'panC'	5.13329	0.00766337	2.85776	3.01e-10
'ppc'	4.11932	2.21e-152	2.64726	5.27e-218
'trpC'	4.62998	3.26e-09	2.43322	1.39e-14
'trpD'	5.65656	8.41e-24	0.94558	0.0283952

## Sheet: commonRES_oriOdd_vs_valEven
geneID	log2FC-original_libOdd	Padj-original_libVOdd	log2FC-validation_libEven	Padj-validation_libEven
'nupC'	7.21386	6.9e-169	9.16872	6.92e-43
'aceF'	6.30779	3.7e-18	8.12168	1.67e-13
'ompR'	4.93266	4.25e-258	7.02936	6.9e-169
'yieP'	5.7785	6.9e-169	6.94681	6.9e-36
'yjjY'	4.06999	7.39e-133	6.87453	4.93e-09
'yohK'	5.24311	6.9e-169	6.76551	5.03e-93
'gmhB'	5.40219	6.9e-169	6.67183	2.11e-06
'yohJ'	5.07771	6.9e-169	6.64911	2.65e-27
'nadC'	7.03563	1.19e-07	6.61917	9.92e-210
'nadB'	5.95127	1.29e-18	6.53424	2.66e-145
'ptsI'	5.14555	0.00147097	6.50585	1.66e-92
'rfaE'	5.05062	6.9e-169	6.41652	1.42e-07
'rfaF'	4.80255	6.9e-169	6.2647	6.48e-53
'rfaC'	5.0271	6.9e-169	6.18877	4.53e-05
'ybfE'	5.33093	6.9e-169	6.06549	5.47e-103
'nadA'	5.52761	0.000294297	5.94527	1.66e-39
'ihfA'	4.36332	1.13e-230	5.60327	2.57e-45
'bioH'	7.05314	1.07e-07	5.4469	3.69e-26
'hfq'	6.5532	1.32e-58	5.17739	1.36e-07
'poxA'	4.23998	6.9e-169	5.11435	5.58e-247
'sodA'	4.1894	3.67e-97	4.88571	1.45e-231
'panB'	5.19335	0.00626319	4.51733	6.45e-15
'bioF'	5.75461	2.26e-06	4.50735	1.29e-25
'bioC'	7.58199	2.66e-08	3.80781	1.63e-19
'rfaG'	4.18569	6.9e-169	3.7374	1.72e-237
'trkA'	4.21188	1.8e-293	3.4003	3.75e-199
'fadR'	4.1	6.9e-169	3.36403	1.04e-104
'panC'	5.13329	0.00766337	2.71447	2.72e-09
'trpC'	4.62998	3.26e-09	2.16816	2.34e-09
'fabH'	6.02469	3.98e-07	1.85252	0.346377
'envZ'	5.15631	6.9e-169	0.145484	0.6133
'fepG'	4.07739	0.037018	strain not available in this library	strain not available in this library
'ppc'	4.11932	2.21e-152	strain not available in this library	strain not available in this library
'cytR'	4.14374	6.9e-169	strain not available in this library	strain not available in this library
'arcA'	4.32452	3.33e-117	strain not available in this library	strain not available in this library
'rfaH'	4.68149	6.9e-169	strain not available in this library	strain not available in this library
'yraO'	4.78774	6.9e-169	strain not available in this library	strain not available in this library
'lpcA'	4.90585	6.9e-169	strain not available in this library	strain not available in this library
'cmk'	4.99582	0.000145163	strain not available in this library	strain not available in this library
'bioD'	5.07748	0.000119059	strain not available in this library	strain not available in this library
'rfaD'	5.21874	6.9e-169	strain not available in this library	strain not available in this library
'trpD'	5.65656	8.41e-24	strain not available in this library	strain not available in this library
