# Supplementary material for: Evolved bacterial resistance to the chemotherapy gemcitabine modulates its efficacy in co-cultured cancer cells
Source: eLife. 2023 Feb 3;12:e83140. doi: 10.7554/eLife.83140 (PMC9931390; doi:10.7554/eLife.83140)
Supplement: Supplementary file 2. [file elife-83140-supp2.xlsx]

## Sheet: NoDrug-Gemcitabine - Enrichment
Pathway id and name	p.geomean	stat.mean	p.val	q.val	set.size	exp1
eco00540 Lipopolysaccharide biosynthesis	3.65e-08	0.576049	3.65e-08	2.34e-06	26	3.65e-08
eco01110 Biosynthesis of secondary metabolites	4.64e-07	0.182103	4.64e-07	1.48e-05	236	4.64e-07
eco00190 Oxidative phosphorylation	3.46e-06	0.475802	3.46e-06	7.38e-05	28	3.46e-06
eco01230 Biosynthesis of amino acids	0.000170237	0.230093	0.000170237	0.00239336	84	0.000170237
eco01210 2-Oxocarboxylic acid metabolism	0.000186981	0.443116	0.000186981	0.00239336	22	0.000186981
eco00770 Pantothenate and CoA biosynthesis	0.000424701	0.493717	0.000424701	0.00453014	16	0.000424701
eco02010 ABC transporters	0.00075808	0.154354	0.00075808	0.00693102	158	0.00075808
eco00290 Valine, leucine and isoleucine biosynthesis	0.00564091	0.430894	0.00564091	0.0449979	14	0.00564091
eco03070 Bacterial secretion system	0.00635387	0.459905	0.00635387	0.0449979	12	0.00635387
eco00053 Ascorbate and aldarate metabolism	0.00703093	0.382789	0.00703093	0.0449979	17	0.00703093
eco00230 Purine metabolism	0.0109545	0.204205	0.0109545	0.0637355	55	0.0109545
GO:0005975 carbohydrate metabolic process	3.3e-12	0.265484	3.3e-12	2.19e-09	199	3.3e-12
GO:0044262 cellular carbohydrate metabolic process	9.3e-11	0.317038	9.3e-11	1.56e-08	119	9.3e-11
GO:0033692 cellular polysaccharide biosynthetic process	1.07e-10	0.437715	1.07e-10	1.56e-08	61	1.07e-10
GO:0009244 lipopolysaccharide core region biosynthetic process	1.17e-10	0.723172	1.17e-10	1.56e-08	22	1.17e-10
GO:0046401 lipopolysaccharide core region metabolic process	1.17e-10	0.723172	1.17e-10	1.56e-08	22	1.17e-10
GO:0000271 polysaccharide biosynthetic process	5.2e-10	0.415709	5.2e-10	5.74e-08	63	5.2e-10
GO:0044264 cellular polysaccharide metabolic process	8.04e-10	0.396321	8.04e-10	7.61e-08	68	8.04e-10
GO:0034637 cellular carbohydrate biosynthetic process	1.1e-09	0.405219	1.1e-09	9.11e-08	64	1.1e-09
GO:0009103 lipopolysaccharide biosynthetic process	4.56e-09	0.550369	4.56e-09	3.36e-07	32	4.56e-09
GO:0005976 polysaccharide metabolic process	6.11e-09	0.368759	6.11e-09	4.05e-07	71	6.11e-09
GO:0016051 carbohydrate biosynthetic process	1.72e-08	0.349039	1.72e-08	1.04e-06	75	1.72e-08
GO:0008653 lipopolysaccharide metabolic process	3.66e-08	0.504278	3.66e-08	1.98e-06	34	3.66e-08
GO:0009312 oligosaccharide biosynthetic process	3.89e-08	0.554227	3.89e-08	1.98e-06	28	3.89e-08
GO:0008610 lipid biosynthetic process	6.38e-08	0.384397	6.38e-08	3.02e-06	57	6.38e-08
GO:1903509 liposaccharide metabolic process	8.39e-08	0.471776	8.39e-08	3.52e-06	37	8.39e-08
GO:0016053 organic acid biosynthetic process	9.01e-08	0.261486	9.01e-08	3.52e-06	123	9.01e-08
GO:0046394 carboxylic acid biosynthetic process	9.01e-08	0.261486	9.01e-08	3.52e-06	123	9.01e-08
GO:1901566 organonitrogen compound biosynthetic process	1.02e-07	0.188057	1.02e-07	3.75e-06	245	1.02e-07
GO:0051186 cofactor metabolic process	2.36e-07	0.234343	2.36e-07	8.25e-06	145	2.36e-07
GO:0019752 carboxylic acid metabolic process	2.61e-07	0.16461	2.61e-07	8.64e-06	307	2.61e-07
GO:0006082 organic acid metabolic process	4.23e-07	0.157868	4.23e-07	1.33e-05	325	4.23e-07
GO:0044283 small molecule biosynthetic process	7.98e-07	0.199723	7.98e-07	2.41e-05	186	7.98e-07
GO:0043436 oxoacid metabolic process	9.47e-07	0.155861	9.47e-07	2.73e-05	314	9.47e-07
GO:0051188 cofactor biosynthetic process	1.26e-06	0.272567	1.26e-06	3.47e-05	94	1.26e-06
GO:0006820 anion transport	1.86e-06	0.216493	1.86e-06	4.94e-05	147	1.86e-06
GO:0006790 sulfur compound metabolic process	2.17e-06	0.300053	2.17e-06	5.54e-05	74	2.17e-06
GO:1901135 carbohydrate derivative metabolic process	2.29e-06	0.184353	2.29e-06	5.62e-05	203	2.29e-06
GO:0006793 phosphorus metabolic process	2.77e-06	0.191655	2.77e-06	6.55e-05	184	2.77e-06
GO:0009108 coenzyme biosynthetic process	3.18e-06	0.308138	3.18e-06	7.27e-05	68	3.18e-06
GO:0006573 valine metabolic process	3.71e-06	0.723109	3.71e-06	8.19e-05	12	3.71e-06
GO:0009311 oligosaccharide metabolic process	4.2e-06	0.405848	4.2e-06	8.98e-05	38	4.2e-06
GO:0043604 amide biosynthetic process	4.77e-06	0.307613	4.77e-06	9.89e-05	66	4.77e-06
GO:0016052 carbohydrate catabolic process	5.07e-06	0.249347	5.07e-06	0.000101842	101	5.07e-06
GO:0072330 monocarboxylic acid biosynthetic process	9.04e-06	0.409407	9.04e-06	0.000176213	35	9.04e-06
GO:0044255 cellular lipid metabolic process	1.06e-05	0.254232	1.06e-05	0.00020096	91	1.06e-05
GO:0019637 organophosphate metabolic process	1.32e-05	0.213509	1.32e-05	0.000242432	128	1.32e-05
GO:0006629 lipid metabolic process	1.52e-05	0.248909	1.52e-05	0.000271743	92	1.52e-05
GO:0009081 branched-chain amino acid metabolic process	1.56e-05	0.541146	1.56e-05	0.000272591	19	1.56e-05
GO:0006732 coenzyme metabolic process	1.81e-05	0.234862	1.81e-05	0.000307351	102	1.81e-05
GO:1901137 carbohydrate derivative biosynthetic process	1.94e-05	0.224714	1.94e-05	0.000321523	111	1.94e-05
GO:0006811 ion transport	2.14e-05	0.156982	2.14e-05	0.000345852	234	2.14e-05
GO:0031163 metallo-sulfur cluster assembly	3.1e-05	0.570889	3.1e-05	0.000489613	16	3.1e-05
GO:0009066 aspartate family amino acid metabolic process	4.1e-05	0.37655	4.1e-05	0.00061851	36	4.1e-05
GO:0006520 cellular amino acid metabolic process	4.1e-05	0.197307	4.1e-05	0.00061851	135	4.1e-05
GO:0015711 organic anion transport	5.71e-05	0.20214	5.71e-05	0.000841808	124	5.71e-05
GO:0016226 iron-sulfur cluster assembly	5.95e-05	0.570723	5.95e-05	0.000857724	15	5.95e-05
GO:1901575 organic substance catabolic process	7.19e-05	0.124412	7.19e-05	0.00101444	342	7.19e-05
GO:0009056 catabolic process	7.78e-05	0.122168	7.78e-05	0.00107123	353	7.78e-05
GO:0043603 cellular amide metabolic process	7.96e-05	0.224866	7.96e-05	0.00107123	96	7.96e-05
GO:0005996 monosaccharide metabolic process	8.08e-05	0.269779	8.08e-05	0.00107123	66	8.08e-05
GO:0044272 sulfur compound biosynthetic process	0.000130277	0.401312	0.000130277	0.00169361	28	0.000130277
GO:1901607 alpha-amino acid biosynthetic process	0.000139703	0.24921	0.000139703	0.00178121	73	0.000139703
GO:0008652 cellular amino acid biosynthetic process	0.000144653	0.234987	0.000144653	0.00180952	82	0.000144653
GO:0006796 phosphate-containing compound metabolic process	0.000293488	0.159062	0.000293488	0.00360339	169	0.000293488
GO:0006810 transport	0.000314921	0.102462	0.000314921	0.00379623	440	0.000314921
GO:0019321 pentose metabolic process	0.000362865	0.446306	0.000362865	0.00424288	20	0.000362865
GO:0051234 establishment of localization	0.000364773	0.10123	0.000364773	0.00424288	443	0.000364773
GO:0009082 branched-chain amino acid biosynthetic process	0.000393616	0.512325	0.000393616	0.00449943	15	0.000393616
GO:0009110 vitamin biosynthetic process	0.000589334	0.347892	0.000589334	0.00662251	31	0.000589334
GO:0015849 organic acid transport	0.000638694	0.199524	0.000638694	0.00705756	95	0.000638694
GO:1901605 alpha-amino acid metabolic process	0.000815519	0.177359	0.000815519	0.00886376	117	0.000815519
GO:1902600 proton transmembrane transport	0.00098175	0.481537	0.00098175	0.0104984	15	0.00098175
GO:0044275 cellular carbohydrate catabolic process	0.0011928	0.288229	0.0011928	0.0125528	41	0.0011928
GO:0046365 monosaccharide catabolic process	0.0013178	0.273236	0.0013178	0.0135638	45	0.0013178
GO:0046942 carboxylic acid transport	0.00132979	0.192294	0.00132979	0.0135638	92	0.00132979
GO:0042364 water-soluble vitamin biosynthetic process	0.00151184	0.330436	0.00151184	0.0151871	30	0.00151184
GO:0015980 energy derivation by oxidation of organic compounds	0.00167834	0.190914	0.00167834	0.0166081	90	0.00167834
GO:0019520 aldonic acid metabolic process	0.00176843	0.460625	0.00176843	0.0169923	15	0.00176843
GO:0046176 aldonic acid catabolic process	0.00176843	0.460625	0.00176843	0.0169923	15	0.00176843
GO:0009060 aerobic respiration	0.00179992	0.297828	0.00179992	0.0170478	36	0.00179992
GO:0016999 antibiotic metabolic process	0.00209557	0.260666	0.00209557	0.0195684	46	0.00209557
GO:0034645 cellular macromolecule biosynthetic process	0.00213164	0.0953541	0.00213164	0.0196288	380	0.00213164
GO:0044248 cellular catabolic process	0.00225376	0.108826	0.00225376	0.0204691	280	0.00225376
GO:0008643 carbohydrate transport	0.00258054	0.186404	0.00258054	0.0231202	88	0.00258054
GO:0009059 macromolecule biosynthetic process	0.0027397	0.0928557	0.0027397	0.024219	385	0.0027397
GO:0006091 generation of precursor metabolites and energy	0.00297987	0.171393	0.00297987	0.0259955	102	0.00297987
GO:0071702 organic substance transport	0.00307945	0.10137	0.00307945	0.0265152	309	0.00307945
GO:0009259 ribonucleotide metabolic process	0.0031587	0.266565	0.0031587	0.0266497	41	0.0031587
GO:0009150 purine ribonucleotide metabolic process	0.00317545	0.280312	0.00317545	0.0266497	37	0.00317545
GO:0019693 ribose phosphate metabolic process	0.00324403	0.234322	0.00324403	0.0268849	53	0.00324403
GO:0015672 monovalent inorganic cation transport	0.00424009	0.298182	0.00424009	0.0343712	31	0.00424009
GO:0015748 organophosphate ester transport	0.00425103	0.442509	0.00425103	0.0343712	14	0.00425103
GO:0000041 transition metal ion transport	0.00443732	0.292305	0.00443732	0.0354451	32	0.00443732
GO:0032787 monocarboxylic acid metabolic process	0.00453123	0.140299	0.00453123	0.0357644	143	0.00453123
GO:0044282 small molecule catabolic process	0.00471485	0.120075	0.00471485	0.0367758	197	0.00471485
GO:0016311 dephosphorylation	0.00485818	0.471948	0.00485818	0.0369881	12	0.00485818
GO:0046348 amino sugar catabolic process	0.00488834	0.492576	0.00488834	0.0369881	11	0.00488834
GO:0006163 purine nucleotide metabolic process	0.00490942	0.253123	0.00490942	0.0369881	42	0.00490942
GO:0051179 localization	0.00513384	0.0791683	0.00513384	0.0382442	490	0.00513384
GO:0006766 vitamin metabolic process	0.0053313	0.25416	0.0053313	0.0392739	41	0.0053313
GO:0009067 aspartate family amino acid biosynthetic process	0.00544266	0.362071	0.00544266	0.0396537	20	0.00544266
GO:0098660 inorganic ion transmembrane transport	0.00574448	0.233456	0.00574448	0.0413977	48	0.00574448
GO:0009084 glutamine family amino acid biosynthetic process	0.0058816	0.429152	0.0058816	0.0419301	14	0.0058816
GO:0098662 inorganic cation transmembrane transport	0.00650148	0.255533	0.00650148	0.0458562	39	0.00650148
GO:0030001 metal ion transport	0.00674689	0.225211	0.00674689	0.0467231	50	0.00674689
GO:0034220 ion transmembrane transport	0.00676533	0.149271	0.00676533	0.0467231	116	0.00676533
GO:0006753 nucleoside phosphate metabolic process	0.00702667	0.177029	0.00702667	0.0480276	81	0.00702667
GO:0051604 protein maturation	0.00740332	0.266082	0.00740332	0.0500857	35	0.00740332
GO:0006826 iron ion transport	0.00810449	0.40151	0.00810449	0.0542755	15	0.00810449
GO:0006040 amino sugar metabolic process	0.00958337	0.408246	0.00958337	0.0635377	14	0.00958337
GO:0009117 nucleotide metabolic process	0.010168	0.173471	0.010168	0.0667461	78	0.010168
GO:0006518 peptide metabolic process	0.0103068	0.201999	0.0103068	0.066994	57	0.0103068
GO:0017001 antibiotic catabolic process	0.0105174	0.338424	0.0105174	0.0676995	20	0.0105174
GO:0043043 peptide biosynthetic process	0.0109783	0.227885	0.0109783	0.0690236	44	0.0109783
GO:0006767 water-soluble vitamin metabolic process	0.0110636	0.238663	0.0110636	0.0690236	40	0.0110636
GO:0006575 cellular modified amino acid metabolic process	0.0110681	0.26651	0.0110681	0.0690236	32	0.0110681
GO:0015740 C4-dicarboxylate transport	0.0111396	0.474884	0.0111396	0.0690236	10	0.0111396
GO:0045333 cellular respiration	0.0124705	0.165479	0.0124705	0.0765549	82	0.0124705
GO:0072350 tricarboxylic acid metabolic process	0.0134797	0.379708	0.0134797	0.081485	15	0.0134797
GO:0015698 inorganic anion transport	0.0135194	0.300476	0.0135194	0.081485	24	0.0135194
GO:0051336 regulation of hydrolase activity	0.0137558	0.423341	0.0137558	0.0821628	12	0.0137558
GO:0044271 cellular nitrogen compound biosynthetic process	0.0146109	0.0763041	0.0146109	0.0864915	412	0.0146109
GO:0042180 cellular ketone metabolic process	0.015668	0.252148	0.015668	0.0919281	33	0.015668
GO:0009141 nucleoside triphosphate metabolic process	0.016761	0.281469	0.016761	0.0974784	26	0.016761
GO:0006733 oxidoreduction coenzyme metabolic process	0.0172836	0.226536	0.0172836	0.0994401	40	0.0172836
GO:0033036 macromolecule localization	0.0173983	0.232164	0.0173983	0.0994401	38	0.0173983

## Sheet: NoDrug-Gemcitabine - Depletion
Pathway id and name	p.geomean	stat.mean	p.val	q.val	set.size	exp1
eco02040 Flagellar assembly	1.11e-10	0.601266	1.11e-10	7.09e-09	32	1.11e-10
eco02030 Bacterial chemotaxis	0.00155896	0.424839	0.00155896	0.0396253	18	0.00155896
eco02020 Two-component system	0.00185743	0.154051	0.00185743	0.0396253	138	0.00185743
GO:0006928 movement of cell or subcellular component	8.74e-07	0.365583	8.74e-07	0.000548332	53	8.74e-07
GO:0001539 cilium or flagellum-dependent cell motility	3.31e-06	0.415178	3.31e-06	0.000548332	37	3.31e-06
GO:0071973 bacterial-type flagellum-dependent cell motility	3.31e-06	0.415178	3.31e-06	0.000548332	37	3.31e-06
GO:0097588 archaeal or bacterial-type flagellum-dependent cell motility	3.31e-06	0.415178	3.31e-06	0.000548332	37	3.31e-06
GO:0009850 auxin metabolic process	2.07e-05	0.645283	2.07e-05	0.0017154	13	2.07e-05
GO:0009852 auxin catabolic process	2.07e-05	0.645283	2.07e-05	0.0017154	13	2.07e-05
GO:0010124 phenylacetate catabolic process	2.07e-05	0.645283	2.07e-05	0.0017154	13	2.07e-05
GO:0042447 hormone catabolic process	2.07e-05	0.645283	2.07e-05	0.0017154	13	2.07e-05
GO:0048870 cell motility	3.35e-05	0.344371	3.35e-05	0.00222266	44	3.35e-05
GO:0051674 localization of cell	3.35e-05	0.344371	3.35e-05	0.00222266	44	3.35e-05
GO:0040011 locomotion	4.57e-05	0.29854	4.57e-05	0.00275594	57	4.57e-05
GO:0010817 regulation of hormone levels	8.63e-05	0.579268	8.63e-05	0.00440249	14	8.63e-05
GO:0042445 hormone metabolic process	8.63e-05	0.579268	8.63e-05	0.00440249	14	8.63e-05
GO:1901606 alpha-amino acid catabolic process	0.000462321	0.359315	0.000462321	0.0218942	30	0.000462321
GO:0071978 bacterial-type flagellum-dependent swarming motility	0.000811028	0.545512	0.000811028	0.034361	12	0.000811028
GO:0009407 toxin catabolic process	0.000829225	0.471964	0.000829225	0.034361	16	0.000829225
GO:0098754 detoxification	0.00142757	0.34344	0.00142757	0.0556752	28	0.00142757
GO:0009404 toxin metabolic process	0.0019573	0.406223	0.0019573	0.0682995	19	0.0019573
GO:0042178 xenobiotic catabolic process	0.0019573	0.406223	0.0019573	0.0682995	19	0.0019573
GO:0071554 cell wall organization or biogenesis	0.00284506	0.343653	0.00284506	0.0943137	25	0.00284506
