# Supplementary material for: Evolved bacterial resistance to the chemotherapy gemcitabine modulates its efficacy in co-cultured cancer cells
Source: eLife. 2023 Feb 3;12:e83140. doi: 10.7554/eLife.83140 (PMC9931390; doi:10.7554/eLife.83140)
Supplement: Supplementary file 3. [file elife-83140-supp3.xlsx]

## Sheet: Summary
Strain	Line	Colony	Total Bases Sequenced	Reference Sequence Length	Coverage (fold)	Date
BW	Ancestor	Combined Lines 1, 2, 3 in 1:1:1	543176981	4631469	117.28	2022-05-11
BW	Control3	4	549661643	4631469	118.68	2022-05-11
BW	1	3	598371016	4631469	129.197	2022-05-11
BW	2	3	510909193	4631469	110.313	2022-05-11
BW	3	8	1262260051	4631469	272.54	2022-05-27
Nissle	Ancestor	Combined Lines 1, 2, 3 in 1:1:1	625243707	5441200	114.909	2022-05-11
Nissle	Control3	2	656297883	5441200	120.616	2022-05-11
Nissle	1	3	388762347	5441200	71.4479	2022-05-11
Nissle	2	3	521526776	5441200	95.8477	2022-05-11
Nissle	3	3	651771520	5441200	119.785	2022-05-11
F-18	Ancestor	Combined Lines 1, 2, 3 in 1:1:1	623761891	5251079	118.787	2022-05-11
F-18	Control3	2	547366478	5251079	104.239	2022-05-11
F-18	1	7	547366478	5251079	104.239	2022-05-11
F-18	2	7	671687275	5251079	127.914	2022-05-11
F-18	3	5	731491031	5251079	139.303	2022-05-11

## Sheet: BW
E. coli BW25113
Predicted mutations
Reference	position	mutation	Ancestor_p	Control	Line 1	Line 2	Line 3	annotation	gene	description
CP009273	2506869	Δ189 bp				Yes		coding (349‑537/1203 nt)	nupC →	nucleoside (except guanosine) transporter
CP009273	2507043	T→C					Yes	S175P (TCC→CCC)	nupC →	nucleoside (except guanosine) transporter
Unassigned new junction evidence
Reference	position		Ancestor_p	Control	Line 1	Line 2	Line 3	annotation	gene	product
CP009273	2282398 =				Yes (43%)			noncoding (1195/1195 nt)	IS5	repeat region
CP009273	2506629 =							coding (109/1203 nt)	nupC	nucleoside (except guanosine) transporter
CP009273	1203246 =		Yes		Yes (42.5%)	Yes (91.9%)	Yes (91.6%)	coding (290/630 nt)	stfP	e14 prophage; uncharacterized protein
CP009273	1205075 =							pseudogene (1/501 nt)	stfE	pseudogene, e14 prophage; side tail fiber protein fragment family;Phage or Prophage Related
CP009273	= 1203261		Yes			Yes (90.2%)	Yes (91.3%)	coding (305/630 nt)	stfP	e14 prophage; uncharacterized protein
CP009273	= 1205058							pseudogene (18/501 nt)	stfE	pseudogene, e14 prophage; side tail fiber protein fragment family;Phage or Prophage Related
Key:
Frequencies of '?' indicate that there were not enough aligned reads to call a mutation at this position in the genome in question (either for or against the mutation).
Yes = mutation present in the sequenced colony
ancestor_p	indicates that ancestor has been run using the population mode in breseq. See methods for details
	known gemcitabine resistance mutation according to the genetic screen
	mutations detected in the ancestor and at least one evolved line
	mutations detected in at least two gemcitabine evolved lines (but not in ancestor nor in control evolved line)
	mutations detected only in one gemcitabine evolved line and not a known gemcitabine resistance gene (but not in ancestor nor in control evolved line)
	mutations detected in control evolved line and gemcitabine evolved lines
	mutation only found in the ancestor
	mutations only detected in control evolved line

## Sheet: EcN
E. coli Nissle 1917 Breseq Results
Predicted mutations
Reference	position	mutation	EcN_ancestor_p	EcN_control	EcN_Line1	EcN_Line2	EcN_Line3	annotation	gene	description
NZ_CP058217	1476545	A→G			1			V249A (GTT→GCT)	nupC ←	nucleoside permease NupC
NZ_CP058217	1642025	G→A		1				A114T (GCT→ACT)	yfaL →	AIDA‑I family autotransporter adhesin YfaL/EhaC
NZ_CP058217	169838	A→T	Yes (36.6%)		1			S166C (AGC→TGC)	xylB →	xylulokinase
NZ_CP058217	4617742	T→A	yes (33.6%)		1			I537N (ATT→AAT)	HW372_RS22160 →	ATP‑binding protein
Unassigned new junction evidence
Reference	position		EcN_ancestor_p	Control	Line 1	Line 2	Line 3	annotation	gene	description
NZ_CP058217	1912197 =				98.1%			intergenic (+99/‑99)	dacD/HW372_RS08995	serine‑type D‑Ala‑D‑Ala carboxypeptidase DacD/ClbS/DfsB family four‑helix bundle protein
NZ_CP058217	4611302 =							intergenic (‑158/‑97)	ssb1/uvrA	single‑stranded DNA‑binding protein SSB1/excinuclease ABC subunit UvrA
NZ_CP058217	= 4298879				97.9%			pseudogene (204/204 nt)	fimB	type 1 fimbria switch DNA invertase FimB
NZ_CP058217	= 4611309							intergenic (‑165/‑90)	ssb1/uvrA	single‑stranded DNA‑binding protein SSB1/excinuclease ABC subunit UvrA
NZ_CP058217	883254 =					95.9%		intergenic (‑71/‑71)	HW372_RS04310/HW372_RS04315	IS3‑like element IS600 family transposase/IS3‑like element ISEc52 family transposase
NZ_CP058217	= 1476302							coding (989/1203 nt)	nupC	nucleoside permease NupC
NZ_CP058217	1120822 =					97.6%		intergenic (+234/+6)	syd/HW372_RS05390	SecY‑interacting protein/IS3‑like element ISEc52 family transposase
NZ_CP058217	1476297 =							coding (994/1203 nt)	nupC	nucleoside permease NupC
NZ_CP058217	= 884500						98.2%	coding (1101/1101 nt)	HW372_RS04320	IS30 family transposase
NZ_CP058217	1477129 =							coding (162/1203 nt)	nupC	nucleoside permease NupC
NZ_CP058217	= 1122069						99.2%	intergenic (‑72/‑394)	HW372_RS05390/yqcC	IS3‑like element ISEc52 family transposase/YqcC family protein
NZ_CP058217	= 1477133							coding (158/1203 nt)	nupC	nucleoside permease NupC
Frequencies of '?' indicate that there were not enough aligned reads to call a mutation at this position in the genome in question (either for or against the mutation).
Yes = mutation present in the line
Highlighted: nupC mutation
ancestor_p	indicates that ancestor has been run using the population mode in breseq. See methods for details
	known gemcitabine resistance mutation according to the genetic screen
	mutations detected in the ancestor and at least one evolved line
	mutations detected in at least two gemcitabine evolved lines (but not in ancestor nor in control evolved line)
	mutations detected only in one gemcitabine evolved line and not a known gemcitabine resistance gene (but not in ancestor nor in control evolved line)
	mutations detected in control evolved line and gemcitabine evolved lines
	mutation only found in the ancestor
	mutations only detected in control evolved line

## Sheet: F-18
F-18
Predicted mutations
Reference	position	mutation	Ancestor	Control	Line 1	Line 2	Line 3	annotation	gene	description
MLZI01000010	180416	C→A	Yes (81.0%)					pseudogene (535/581 nt)	BKN13_13830 →	phage tail protein
MLZI01000095	1	Δ686 bp		Yes	Yes	Yes	Yes		[BKN13_26315]	[BKN13_26315]
MLZI01000106	86	C→G	Yes (100%)		Yes	Yes		pseudogene (86/416 nt)	BKN13_26385 →	autotransporter (AT) family porin
MLZI01000110	14	A→G	?	Yes	?			pseudogene (252/265 nt)	BKN13_26400 ←	hypothetical protein
MLZI01000112	1	Δ200 bp			Yes			intergenic (–/–)	– / –	–/–
Unassigned new junction evidence
Reference	position		Ancestor	Control	Line 1	Line 2	Line 3	annotation	gene	description
MLZI01000109	1 =		+CAACGCGGTGGTGAAC Yes (100%)					pseudogene (341/341 nt)	BKN13_26395	hypothetical protein
MLZI01000113	= 200							intergenic (–/–)	–/–	–/–
MLZI01000020	85783 =				Yes (96.6%)			pseudogene (3/1218 nt)	BKN13_20545	hypothetical protein
MLZI01000021	1096 =				1			coding (264/1203 nt)	BKN13_20550	nucleoside permease
MLZI01000021	= 1104				Yes (93.5%)		Yes (96.1%)	coding (256/1203 nt)	BKN13_20550	nucleoside permease
MLZI01000088	764 =				1			intergenic (+667/–)	BKN13_26260/–	transposase/–
MLZI01000021	746 =					Yes (98.6%)		coding (614/1203 nt)	BKN13_20550	nucleoside permease
MLZI01000078	1 =					1		intergenic (–/+3)	–/BKN13_26195	–/IS4 family transposase
MLZI01000021	= 755					Yes (83%)		coding (605/1203 nt)	BKN13_20550	nucleoside permease
MLZI01000021	66524 =					1		intergenic (+21/–)	BKN13_20975/–	DNA injection protein/–
MLZI01000106	= 416					Yes (100%)		pseudogene (416/416 nt)	BKN13_26385	autotransporter (AT) family porin
MLZI01000113	= 143							intergenic (–/–)	–/–	–/–
MLZI01000112	= 200					Yes (100%)		intergenic (–/–)	–/–	–/–
MLZI01000113	= 143							intergenic (–/–)	–/–	–/–
MLZI01000030	= 4015						Yes (100%)	coding (181/330 nt)	BKN13_22975	hypothetical protein
MLZI01000072	= 1611						1	intergenic (‑29/–)	BKN13_26150/–	phage tail protein/–
MLZI01000020	85783 =						Yes (98%)	pseudogene (3/1218 nt)	BKN13_20545	hypothetical protein
MLZI01000021	1096 =							coding (264/1203 nt)	BKN13_20550	nucleoside permease
MLZI01000021	= 1104						Yes (96.1%)	coding (256/1203 nt)	BKN13_20550	nucleoside permease
MLZI01000088	764 =							intergenic (+667/–)	BKN13_26260/–	transposase/–
Key:
Frequencies of '?' indicate that there were not enough aligned reads to call a mutation at this position in the genome in question (either for or against the mutation).
Yes = mutation present in the line
Highlighted: nupC mutation
ancestor_p	indicates that ancestor has been run using the population mode in breseq. See methods for details
	known gemcitabine resistance mutation according to the genetic screen
	mutations detected in the ancestor and at least one evolved line
	mutations detected in at least two gemcitabine evolved lines (but not in ancestor nor in control evolved line)
	mutations detected only in one gemcitabine evolved line and not a known gemcitabine resistance gene (but not in ancestor nor in control evolved line)
	mutations detected in control evolved line and gemcitabine evolved lines
	mutation only found in the ancestor
	mutations only detected in control evolved line
	ignored due to low coverage/fit on read mapping on this contig
