# Supplementary material for: Evolved bacterial resistance to the chemotherapy gemcitabine modulates its efficacy in co-cultured cancer cells
Source: eLife. 2023 Feb 3;12:e83140. doi: 10.7554/eLife.83140 (PMC9931390; doi:10.7554/eLife.83140)
Supplement: Supplementary file 4. [file elife-83140-supp4.xlsx]

## Sheet: Supplementary File 3
	gemcitabine - nupC (normalized to nfsA locus)				furazolidone - nfsA
	p (mutation rate)	95%_confidence interval1	95%_confidence interval1		p (mutation rate)	95%_confidence interval1	95%_confidence interval1
BW25113_Bio1	2.12138e-07	1.59263e-07	2.6827e-07		3.19112e-08	1.39944e-08	5.9359e-08
BW25113_Bio2	2.45868e-07	1.82399e-07	3.12932e-07		4.02521e-08	1.9469e-08	7.0525e-08
BW25113_Bio3	2.41042e-07	1.79212e-07	3.06963e-07		4.8015e-08	2.58699e-08	7.86383e-08
BW25113_Bio4	2.10652e-07	1.56407e-07	2.69113e-07		3.967e-08	1.85032e-08	7.08058e-08
EcN_Bio1	9.02e-08	6.31e-08	1.2e-07		1.76e-08	7.21e-09	3.43e-08
EcN_Bio2	1.06e-07	7.54e-08	1.39e-07		1.11e-08	3.56e-09	2.49e-08
EcN_Bio3	1.32e-07	9.71e-08	1.7e-07		1.85e-08	8.63e-09	3.39e-08
EcN_Bio4	1.2e-07	8.58e-08	1.58e-07		1.88e-08	8.16e-09	3.53e-08
F18_Bio1	1.99238e-08	6.26042e-09	4.45604e-08		1.84648e-07	1.16072e-07	2.67845e-07
F18_Bio2	2.27799e-08	9.85522e-09	4.34893e-08		2.81857e-07	1.88353e-07	3.90526e-07
F18_Bio3	2.27799e-08	9.85522e-09	4.34893e-08		2.04856e-07	1.246e-07	3.03616e-07
F18_Bio4	5.13627e-08	2.84668e-08	8.24916e-08		2.48683e-07	1.5784e-07	3.55576e-07
MG1655_Bio1	2.26154e-07	1.56628e-07	3.04418e-07		1.02616e-07	5.58828e-08	1.67366e-07
MG1655_Bio2	2.64227e-07	1.93573e-07	3.41929e-07		1.05928e-07	5.90759e-08	1.68571e-07
MG1655_Bio3	2.5023e-07	1.78204e-07	3.29637e-07		2.16517e-07	1.42132e-07	3.05919e-07
MG1655_Bio4	2.73928e-07	1.99445e-07	3.54432e-07		1.32842e-07	8.06607e-08	1.99589e-07
