# Supplementary material for: Evolved bacterial resistance to the chemotherapy gemcitabine modulates its efficacy in co-cultured cancer cells
Source: eLife. 2023 Feb 3;12:e83140. doi: 10.7554/eLife.83140 (PMC9931390; doi:10.7554/eLife.83140)
Supplement: Supplementary file 5. [file elife-83140-supp5.xlsx]

## Sheet: Sheet1
Colony	Mutation (nupC CDS)	AA change	Chenge in DNA Sequence	Mutation category	DNA position(nupC CDS)
40	C7A	R3S		point	7
3	22:24del(GTA)	V8del	-GTA	deletion	22:24:00
10	29insT	A10fs	+T	insert, frameshift	29
76	58insC	L20fs	+C	insert, frameshift	58
52	76insA	I28fs	+A	insert, frameshift	75
69	76insA	I28fs	+A	insert, frameshift	75
87	76insA	I28fs	+A	insert, frameshift	75
96	76insA	I28fs	+A	insert, frameshift	75
99	76insA	I28fs	+A	insert, frameshift	75
23	76insA	I28fs	+A	insert, frameshift	76
32	76insA	I28fs	+A	insert, frameshift	76
91	A76del	I28fs	-A	deletion, frameshift	81
92	A76del	I28fs	-A	deletion, frameshift	81
44	85insIS1	R29	transposon insertion	transposon	84
75	99insIS1	V33	transposon insertion	transposon	98
7	132insIS2A	A44	transposon insertion	transposon	132
38	182insIS5A	S61	transposon insertion	transposon	181
97	T203G	L68R	CTC>CGC	point	203
30	214insIS1	N72	transposon insertion	transposon	214
28	G217T	E73*	GAA>TAA	point, nonsense	217
39	220insG	T75fs	+G	insert, frameshift	220
50	G221A	G74E	GGG>GAG	point	221
37	227insIS3A	N76	transposon insertion	transposon	226
83	227insIS2	N76	transposon insertion	transposon	226
6	234insIS2A	V78	transposon insertion	transposon	234
8	G262A	A88T		point	262
55	C290A	P97Q	CCA>CAA	point	290
85	294insIS2A	I98	transposon insertion	transposon	294
5	A313T	I105F	ATC>TTC	point	313
14	A313T	I105F	ATC>TTC	point	313
21	A313T	I105F	ATC>TTC	point	313
29	A313T	I105F	ATC>TTC	point	313
57	A313T	I105F	ATC>TTC	point	313
60	A313T	I105F	ATC>TTC	point	313
95	A313T	I105F	ATC>TTC	point	313
64	G317A	G106D	GGT>GAT	point	317
15	336insIS1	R112	transposon insertion	transposon	335
79	T341G	L114W	TTG>TGG	point	341
16	358insIS2	A120	transposon insertion	transposon	357
68	380?insIS5A	K127	transposon insertion	transposon	380
51	T411G	F137L	TTT>TTG	point	411
33	C439A	Q147A	CAG>AAG	point	439
89	C450A	N150K	AAC>AAA	point	450
47	462insT	K155fs		insert, frameshift	462
17	G511A	A171T	GCC>ACC	point	511
98	C512A	A171D	GCC>GAC	point	512
45	C515A	T172K	ACG>AAG	point	515
94	528insIS5A?	T176	transposon insertion	transposon	528
43	T553G	Y185D	TAC>GAC	point	553
35	561insIS2	T187	transposon insertion	transposon	561
9	574insA	P191fs	+A	insert, frameshift	574
31	C603A	N201K	AAC>AAA	point	602
90	C645A	Y215*	TAC>TAA	point, nonsense	645
4	G796C	A266P	GCG>CCG	point	796
34	G890A	W297*	TGG>TAG	point, nonsense	890
88	G890A	W297*	TGG>TAG	point, nonsense	890
2	891+G	W297fs	+G	insert, frameshift	891
22	C941A	A314E	GCG>GAG	point	941
46	G952T	V318F		point	952
1	C971A	A324E	GCG>GAG	point	971
49	C971T	A324V	GCG>GTG	point	971
86	G975del	M325fs		deletion, frameshift	975
82	C1046G	S349C	TCC>TGC	point	1046
77	T1062del	S354fs	-T	deletion, frameshift	1062
54	G1069T	G357W	GGG>TGG	point	1069
72	G1069T	G357W	GGG>TGG	point	1069
12	A1090T	K364*	AAA>TAA	point, nonsense	1090
27	A1090T	K364*	AAA>TAA	point, nonsense	1090
70	G1094A	G365D	GGC>GAC	point	1094
18	G1132C	G378R	GGT>CGT	point	1132
63	G1162T	V388L	GTG>TTG	point	1162
93	T1167G	S389R	AGT>AGG	point	1167
25	T1172G	L391R	CTG>CGG	point	1172
84	T1174C	S392P	TCG>CCT	point	1174
42	344:382del	V182:V194	-tcgttggtgcatacatgaccatgctggaaccgaaatacg	deletion	344::382
20	463:466del	K155delD156fs		deletion, frameshift	463:466
73	528:542dupGTGTCGATGTCCATC	dup(T176:I181)fs		duplication	528:542
26	621:645del	I207_Y215delfs	-cgtgctgtcgctgatcaatccttac	deletion, frameshift	621::645
36	621:645del	V208:R216delfs	-cgtgctgtcgctgatcaatccttac	deletion, frameshift	621:645
100	731:732del	L244fs	-TG	deletion, frameshift	731::732
24	782:793del	I261:A264del_A265T	-tcgccctgatcg	deletion	782:793
74	816_825del	A272delfs	-caccgttact	deletion, frameshift	816:825
11	Wild type
13	Wild type
19	Wild type
41	Wild type
48	Wild type
56	Wild type
59	Wild type
61	Wild type
62	Wild type
65	Wild type
66	Wild type
71	Wild type
80	Wild type
81	Wild type
53	reaction failed
58	reaction failed
67	reaction failed
78	reaction failed
